# Supplementary material for: Innate and early immune responses to Yersinia ruckeri in the spleen of rainbow trout (Oncorhynchus mykiss)
Source: Research Square preprint supplement (doi:10.21203/rs.3.rs-219853/v1), 2021-02-23
Supplement: Supplementary file 1 [file 3536998bd8bfaf1677a39cc8.xlsx]

## Sheet: Table S3
#ID	Control1_Count	Control2_Count	Control3_Count	YR1_Count	YR2_Count	YR3_Count	Control1_FPKM	Control2_FPKM	Control3_FPKM	YR1_FPKM	YR2_FPKM	YR3_FPKM	FDR	log2FC	regulated
gene10016	1166	1712	1168	5017	7341	13025	10.8902	16.5255	11.1486	51.2842	70.0667	132.58	0.000460774	3.02188	up
gene10063	974	1109	974	340	278	318	8.8521	11.1443	9.54461	3.5288	3.01545	3.16669	0.00225449	-1.30824	down
gene10064	324	228	241	1626	2675	3114	2.7994	2.22446	2.20052	16.2809	25.6847	27.6015	7.9027e-11	3.63946	up
gene10070	351	204	323	3358	15398	9066	3.11774	2.1783	2.87893	35.2073	126.887	67.6488	0.00189437	5.42983	up
gene10137	609	731	609	1202	1112	1104	2.44564	2.51221	2.39573	4.19372	4.00126	4.27017	0.00271613	1.21067	up
gene10146	428	393	383	1448	3138	2828	4.09234	4.24495	3.86259	15.9938	33.1297	27.5077	2.65277e-05	3.03483	up
gene10148	197	292	227	2718	9048	3688	0.983857	1.70341	1.15848	11.4732	33.3405	12.6006	0.00687233	4.84909	up
gene10151	657	666	720	1223	2293	2296	5.37488	6.1638	6.21634	11.584	20.8256	19.255	0.000365747	1.91587	up
gene10154	157	137	101	7280	8700	13572	2.20375	1.98336	1.27961	99.8128	114.513	164.524	2.2203e-24	6.62135	up
gene10230	367	406	381	2641	2149	4574	2.60962	2.96531	3.60685	20.6646	16.9577	33.6142	6.28009e-07	3.40445	up
gene10233	4367	3004	3602	6091	6270	6608	65.0597	50.628	56.6	105	103.607	100.826	0.00789231	1.20975	up
gene10251	148	91	147	1725	2604	2392	1.35686	0.940229	1.40137	18.0942	26.7469	22.232	2.39872e-24	4.55084	up
gene10258	1609	1069	1425	2887	3600	2878	7.1577	5.35988	6.69212	14.7434	17.5857	13.055	3.45733e-05	1.6196	up
gene10272	295	235	279	616	738	901	1.13274	1.01759	1.13904	2.7467	3.1568	3.56497	3.45673e-06	1.88981	up
gene1028	214	245	260	407	518	608	1.46054	1.90239	1.87322	3.21357	5.79875	4.24854	0.00124562	1.49209	up
gene10353	320	283	192	42	67	67	3.11069	3.22337	1.96245	0.499465	0.714966	0.658227	0.00684162	-1.76808	down
gene10371	46	35	70	2	0	2	0.334406	0.288415	0.533925	0.015766	0	0.01448	1.72875e-06	-4.85199	down
gene10401	101	95	150	850	1271	759	0.873521	0.769104	1.29172	6.76817	10.4928	5.06066	8.43909e-08	3.48574	up
gene10422	5	3	9	1393	3471	1167	0.068923	0.03077	0.124514	25.099	61.0188	18.6057	2.82578e-06	8.93051	up
gene10437	1382	2025	1634	368	385	467	4.99556	8.27084	6.19478	1.52687	1.53025	2.16743	0.000140673	-1.65873	down
gene10438	1144	922	1065	1617	1650	1955	7.1485	6.61274	7.53776	11.9172	11.7335	11.807	0.00471239	1.1496	up
gene10482	870	825	748	315	234	253	3.97443	3.92811	3.37291	1.58247	1.09186	1.20862	0.00907284	-1.19978	down
gene10485	155	338	276	694	1004	781	0.652607	1.40976	0.994492	3.13199	4.31579	3.083	4.06184e-07	2.07834	up
gene10496	713	831	651	2355	5519	6858	7.73882	10.3005	7.65012	29.8874	66.8337	77.7599	0.000505651	3.13842	up
gene10549	409	494	404	683	968	1195	3.96074	5.3668	4.1133	7.65998	10.7256	11.9686	0.000113733	1.51537	up
gene10557	119	82	83	1019	1016	976	0.848911	0.410896	0.636807	8.80386	8.56968	5.3414	1.7842e-21	3.8275	up
gene10565	225	234	249	31	19	48	2.7846	3.28599	3.25053	0.43671	0.251049	0.605084	0.000206092	-2.46797	down
gene10575	576	577	510	2029	3430	3544	6.1396	7.49601	5.84521	27.6908	42.0856	38.4972	1.07835e-08	2.84124	up
gene10578	497	373	559	86	39	12	3.35466	2.74608	3.85018	0.64781	0.279024	0.0744	1.82952e-08	-2.9448	down
gene10582	799	576	470	1139	1022	1063	7.18952	6.02675	4.68483	12.2605	11.6291	10.6913	0.00298978	1.22147	up
gene10587	1866	1594	1594	2342	4052	3639	4.8542	4.47864	3.85994	6.99364	11.2171	9.13423	0.00154547	1.40452	up
gene10592	878	823	1411	107	79	123	4.59514	4.86818	7.78566	0.647811	0.453566	0.658879	2.89463e-08	-2.92626	down
gene10632	446	419	374	1459	2135	2337	3.48924	3.71552	3.0847	13.2299	18.5547	18.7586	1.61741e-12	2.66448	up
gene10641	166	121	190	227	327	432	1.85471	1.52557	2.24995	2.9391	4.06389	4.96143	0.00867428	1.46078	up
gene10650	402	419	338	1370	2451	1781	9.41961	11.0886	8.34586	37.147	63.7213	42.7478	7.42513e-06	2.68542	up
gene10678	199	276	279	66	27	32	1.44917	2.27987	2.27765	0.580844	0.13629	0.149911	0.000724963	-2.19537	down
gene10680	170	144	136	304	373	505	1.18581	1.19817	1.07398	2.51742	3.83397	4.25959	0.000332821	1.79682	up
gene1070	686	1032	1404	6267	6439	8416	14.6726	22.1603	30.3881	151.633	152.682	181.627	1.3287e-15	3.15298	up
gene10708	111	84	115	7840	13217	14530	1.29492	1.09717	1.41046	106.18	171.505	172.612	4.59668e-27	7.25899	up
gene10736	353	261	299	1105	1932	1934	6.45159	5.39932	5.76998	23.4188	39.2371	36.2796	4.6412e-08	2.86278	up
gene10756	1111	1256	896	1864	2912	2226	5.52625	6.94325	4.61361	10.5387	15.7784	11.1342	0.000479492	1.50826	up
gene10794	7	10	4	402	368	318	0.074513	0.129305	0.046559	5.68972	4.99791	4.46084	6.77781e-23	6.08338	up
gene1080	80	67	56	0	0	19	0.745901	0.763664	0.550272	0	0	0.17289	0.000609461	-3.08589	down
gene10802	83	58	25	180	243	210	1.1788	0.849514	0.342637	2.79565	3.57694	2.91066	0.000157345	2.34913	up
gene10807	11	16	17	20481	76398	41413	0.182183	0.321617	0.304587	426.285	1524.07	762.842	7.4183e-10	12.0338	up
gene10827	224	230	183	515	658	664	6.65043	7.73004	5.71852	17.7114	21.7067	20.2205	6.51717e-06	1.93172	up
gene10855	1165	1056	944	1377	2080	1968	6.97183	7.14736	5.95777	9.5327	13.8062	12.0646	0.00322537	1.1882	up
gene10891	0	1	0	266	652	953	0	0.024194	0	8.35032	19.6295	26.5295	1.65228e-11	11.1402	up
gene109	28	55	23	149	350	427	0.436757	0.97859	0.369309	2.71614	6.12268	7.45575	0.000143247	3.49306	up
gene10906	659	497	598	211	121	170	5.69162	4.8543	5.42048	2.12513	1.1563	1.4964	0.00541488	-1.39293	down
gene1094	466	442	472	637	947	945	4.08294	4.38285	4.35863	6.45202	9.20179	8.4775	0.00213568	1.2837	up
gene10943	533	572	570	1501	1465	1538	2.96501	3.91025	3.53442	10.3057	9.6213	9.27011	8.08108e-07	1.83161	up
gene11003	47	7	21	750	609	691	0.516895	0.076769	0.239689	9.71092	7.55076	7.91878	8.62049e-28	5.23498	up
gene11027	219	334	274	795	1231	1194	1.79085	3.19074	2.74383	7.72297	11.3377	9.96223	2.65169e-09	2.35385	up
gene11040	648	486	579	195	146	145	2.24092	1.90015	2.11241	0.77833	0.559196	0.510721	0.00530537	-1.39806	down
gene11047	100	88	69	1128	3910	2425	1.52951	1.51555	1.11233	19.9762	66.3884	38.0138	0.000237232	5.28299	up
gene11057	105	108	103	9	11	24	1.67143	1.94309	1.72734	0.154643	0.178988	0.388613	0.00299527	-2.46136	down
gene11074	777	439	584	199	67	246	7.10989	4.54537	5.63359	2.09854	0.679046	2.30191	0.00491532	-1.41158	down
gene11078	31	29	15	1020	1157	2013	0.472776	0.50032	0.233224	19.6651	21.4107	34.3351	2.80377e-16	6.19125	up
gene11105	6704	8075	6632	1847	1089	602	88.1124	118.339	97.8399	33.183	10.5375	9.74088	1.8718e-08	-2.18588	down
gene11124	10	21	20	170	128	150	0.126059	0.30731	0.280787	2.66149	1.9134	2.0759	4.08577e-07	3.5191	up
gene11145	1061	728	977	2133	2529	2309	11.69	9.18492	11.4875	27.2829	31.0601	26.0241	3.18103e-06	1.7582	up
gene11153	229	151	147	432	369	447	2.29371	1.73183	1.66924	2.61934	4.31208	4.58431	0.000851195	1.66053	up
gene1117	5	36	38	678	1111	1080	0.019947	0.198406	0.31593	5.9238	9.23246	8.28045	6.08262e-23	5.55575	up
gene11185	3251	2454	2785	6071	8395	8987	22.7933	19.4866	20.5976	48.9345	65.306	64.6107	6.54069e-06	1.88154	up
gene112	0	21	0	114	42	48	0	0.086855	0	0.48189	0.169272	0.176606	0.00969581	3.56407	up
gene11227	484	444	537	1385	1725	1834	2.39695	2.5193	2.85756	7.93774	10.7378	9.31125	3.74428e-09	2.16553	up
gene11236	1821	1535	1338	6461	9787	9531	21.2241	19.9555	13.1489	86.8002	126.513	119.218	1.81612e-12	2.86946	up
gene11245	131	116	145	4	5	18	0.409143	0.409925	0.47729	0.014083	0.01406	0.05522	1.11993e-05	-3.48392	down
gene1125	1644	988	1452	2895	4068	5966	20.7226	9.66184	18.5857	40.045	50.5236	80.2463	0.000140786	2.07765	up
gene11348	3123	2533	2746	6401	5677	7129	40.2663	37.3168	54.8819	113.924	80.698	95.0156	0.000118196	1.60251	up
gene11350	826	872	866	232	115	108	2.96546	3.53943	3.27899	0.963229	0.457601	0.39713	8.49173e-07	-2.08565	down
gene11357	12	21	45	3041	12583	4450	0.298743	0.648446	1.34531	102.388	404.475	132.284	0.000337199	8.44517	up
gene11368	1384	1086	1298	1854	2609	2493	9.14707	9.27728	9.35947	17.3141	22.8404	20.0996	0.00108666	1.30256	up
gene11398	1541	2490	1780	44	59	314	14.073	26.0831	17.2548	0.509206	0.652821	2.91668	6.27791e-07	-3.46093	down
gene11402	242	206	203	26	43	33	2.4014	2.3129	2.12531	0.290765	0.464553	0.331152	0.000842006	-2.25441	down
gene11417	213	218	234	10	7	13	1.38095	1.6001	1.60435	0.071661	0.043852	0.08482	7.91771e-09	-4.07733	down
gene11446	818	1013	650	1783	2178	3090	4.05166	5.51646	3.24417	10.2007	11.6382	14.9918	1.75449e-06	1.89186	up
gene11447	951	884	932	1533	1609	2194	7.42635	8.16358	7.88317	13.8013	13.9224	17.4461	0.000469725	1.34962	up
gene11479	1669	1467	958	5193	9091	4607	23.9602	22.8142	13.0046	82.8987	165.717	61.8419	0.00206374	2.63142	up
gene11487	44	50	45	175	175	232	0.658408	0.855571	0.828756	2.3052	2.14361	2.7538	9.99584e-05	2.46094	up
gene11489	238	223	252	27	33	49	2.77004	2.93648	3.09716	0.354352	0.41875	0.576245	0.000480147	-2.30997	down
gene1149	374	354	378	78	21	99	3.45325	3.69885	3.67869	0.830462	0.205306	0.936978	0.00028552	-2.1009	down
gene11628	334	568	364	739	1591	1839	2.81752	5.58601	3.4663	9.19027	16.7678	19.7816	0.00457576	2.09886	up
gene11654	794	900	958	1702	1397	1317	15.9437	19.9964	19.3115	36.0416	31.7948	26.8372	0.00499054	1.14254	up
gene11655	1	8	2	84	65	107	0.002823	0.104537	0.024344	1.1814	0.88493	1.33816	7.55343e-09	4.85937	up
gene11669	468	406	481	886	1254	1841	5.54544	5.03756	5.43622	13.9788	14.0515	14.2426	0.000273952	1.95702	up
gene11672	548	413	535	1014	730	1209	7.06048	6.61249	8.23805	17.3714	14.2785	18.4168	0.000509553	1.3882	up
gene1170	5	5	0	47	86	95	0.02886	0.032651	0	0.385386	0.676716	0.690357	1.82119e-08	4.89665	up
gene1175	69	60	87	333	439	405	0.633009	0.868735	0.975943	1.9955	2.73195	2.29399	1.66861e-08	2.86424	up
gene11778	213	76	110	306	387	303	7.78735	3.15082	4.2236	12.9566	15.7182	11.3406	0.00132795	1.76911	up
gene11798	52	35	47	3	3	3	0.543278	0.41407	0.519307	0.036352	0.023556	0.03116	0.000195311	-3.47311	down
gene11801	53	72	61	3	10	5	0.334	0.511116	0.525382	0.020925	0.065694	0.028545	0.000835455	-2.95329	down
gene11824	1461	1144	1200	574	513	198	9.4265	8.34862	8.68653	5.38385	3.79456	1.30777	0.00604888	-1.13061	down
gene11831	1279	1391	1387	4951	4861	8545	11.3073	12.8305	10.2934	30.5982	31.8258	49.7905	2.79618e-07	2.5675	up
gene11839	448	349	354	703	561	1096	2.50455	2.61199	2.0357	4.37573	3.35828	6.11327	0.00206506	1.43448	up
gene11866	819	700	869	1750	1111	1273	12.4125	11.8729	15.0122	33.0823	17.8339	19.4739	0.00285779	1.20469	up
gene1189	0	0	0	77	129	118	0	0	0	1.31588	2.12091	1.7922	3.80319e-16	Inf	up
gene11916	460	401	325	708	635	1013	7.12067	6.51334	5.00834	11.5807	12.4171	15.2597	0.000752538	1.38801	up
gene11924	171	161	102	11	14	27	1.04393	1.09634	0.656798	0.066024	0.089296	0.166144	0.000456896	-2.676	down
gene11925	70	55	34	10	4	0	0.89448	0.777939	0.439633	0.124922	0.057726	0	0.00063697	-3.0693	down
gene1197	1376	737	802	2409	3047	5146	18.5138	11.2093	11.38	37.5047	45.4572	70.8977	0.000399901	2.27605	up
gene11991	334	229	224	1354	1411	1746	3.76118	2.83064	2.58314	17.1657	17.1564	19.5991	2.431e-15	2.93323	up
gene11997	151	261	156	411	1222	1404	1.41955	1.99704	1.51546	3.34086	8.67468	9.66362	0.00773793	2.79609	up
gene12013	4764	4385	3889	7196	12373	13425	33.9181	35.9312	30.2457	59.1723	96.475	96.7053	0.000248635	1.74541	up
gene12018	401	163	276	703	1064	1710	1.79984	0.825603	1.30786	3.65375	5.30348	7.87368	0.00100211	2.47363	up
gene12184	150	137	108	589	856	1103	1.22079	1.25974	0.924858	5.55035	7.73888	9.20676	4.12534e-10	3.08959	up
gene1219	513	353	425	914	1378	1789	3.42682	3.15462	2.57602	6.78596	10.7133	11.9699	2.00524e-05	2.07346	up
gene12278	226	98	132	521	404	401	1.64155	0.799566	1.01125	4.38672	3.25672	2.98393	4.8384e-05	1.97752	up
gene12280	473	517	750	1650	2535	3656	3.10377	3.83503	5.18812	12.5235	18.4487	24.5678	4.30541e-05	2.57071	up
gene12306	457	453	328	71	77	161	4.34475	4.79934	3.29539	0.713379	0.80907	1.56461	0.00462038	-1.61928	down
gene12318	1876	1908	2125	3476	4435	4291	6.89107	7.92855	8.23513	14.7763	18.0718	16.1447	0.000303276	1.45547	up
gene12328	97	161	144	0	0	0	0.752555	1.41526	1.17883	0	0	0	2.66914e-14	#NAME?	down
gene12345	194	194	286	813	869	1149	0.844413	1.08816	1.32311	4.85141	4.05305	5.20352	1.61975e-10	2.47565	up
gene12371	181	107	232	2619	1842	3311	1.04031	0.691775	1.41235	17.5784	11.8426	19.6714	6.1419e-21	4.31751	up
gene1238	469	579	469	893	1303	1247	5.85081	8.6081	6.55586	14.3346	21.0596	18.6561	3.73683e-05	1.58174	up
gene12385	1055	1132	1158	308	269	577	6.92985	8.79995	7.73017	1.90868	1.3413	3.76918	0.00947417	-1.15005	down
gene12394	277	313	322	74	69	72	1.09008	1.39248	1.33473	0.333897	0.299008	0.288676	0.00741575	-1.68096	down
gene1241	4261	3299	4553	45725	70053	74715	28.1325	24.6386	31.7055	349.448	513.162	505.367	1.14948e-13	4.39167	up
gene12410	110	121	91	202	311	356	1.12699	1.40748	0.986357	2.41361	3.56391	3.75948	0.00108177	1.82899	up
gene12433	255	232	198	9749	10522	22953	1.28457	1.32123	1.04961	56.8978	58.8601	118.565	4.06991e-09	6.36608	up
gene1246	1866	1413	1639	3928	6149	5229	9.40352	6.38857	8.70558	21.2169	32.257	19.6951	2.39129e-07	2.06008	up
gene12533	1080	914	1117	81303	131588	136711	9.8228	9.40027	10.7203	856.109	1328.05	1274.03	7.3432e-23	7.2256	up
gene12557	612	737	654	1112	1077	1329	4.6955	6.40409	5.30004	9.88071	9.17254	10.4586	0.00255773	1.20775	up
gene12566	245	218	187	25	21	78	1.30825	1.26623	0.859068	0.119128	0.106449	0.352699	0.00415869	-2.01626	down
gene12573	149	142	95	1263	3108	2388	5.55485	5.95996	3.71824	55.1175	131.058	92.4557	1.84004e-06	4.54217	up
gene12601	269	251	267	853	1237	1230	1.70435	1.78243	2.7887	12.6909	18.3225	15.4599	5.24608e-11	2.48714	up
gene1261	7780	8390	8540	10831	18243	18289	66.9048	84.9607	79.8131	125.151	198.03	182.075	0.00864643	1.34369	up
gene12616	154	138	151	605	990	1728	0.948738	1.11293	1.13656	4.74541	7.50659	12.52	0.000593104	3.30142	up
gene12629	3196	2827	2728	6751	7614	9567	19.1089	19.1224	17.1989	46.7084	50.4915	58.5802	8.34324e-06	1.85629	up
gene12636	103	101	104	309	365	295	0.706378	0.744982	0.840269	2.35776	2.6771	1.99562	0.000122376	2.06783	up
gene12646	406	190	255	1133	1185	2289	4.69839	2.27209	3.3238	15.1906	14.8688	26.3386	5.07807e-05	2.85212	up
gene12647	166	166	186	3269	5557	6025	0.822251	1.0237	0.754833	15.3309	28.4509	29.6629	1.19937e-17	5.24758	up
gene12655	242	70	219	485	267	369	3.34047	1.04836	3.21638	7.75894	4.16597	5.30602	0.00555563	1.52066	up
gene12659	106	144	137	411	687	1037	0.545213	0.837847	0.745247	2.45623	3.93707	5.49693	0.00019708	2.84856	up
gene12672	617	675	668	1734	1874	2209	6.37982	8.07834	7.37589	21.2035	21.958	23.8936	7.47733e-08	1.96991	up
gene12685	168	197	164	27	19	34	0.899689	1.19104	0.924857	0.163482	0.11109	0.182544	0.00131691	-2.33875	down
gene12697	1023	824	796	304	282	285	8.8185	8.98039	7.64433	3.17928	2.76871	2.63418	0.00812527	-1.18702	down
gene12702	310	123	101	1025	792	946	1.39947	0.592164	0.465081	5.27865	4.31912	4.28037	1.33113e-12	2.8065	up
gene12711	1210	1465	1546	2418	3891	2447	5.45157	7.7017	7.66379	10.7311	16.7562	10.0196	0.00974668	1.46776	up
gene12758	388	310	447	567	718	839	2.24028	1.64324	1.76648	2.21368	2.73554	3.24776	0.00260535	1.3053	up
gene12773	42	59	55	0	16	6	0.393961	0.629762	0.534888	0	0.159911	0.056494	0.00848509	-2.39761	down
gene12776	739	642	698	1157	2284	1968	3.17424	3.1188	3.15954	5.75312	10.8825	8.65877	0.00194452	1.79621	up
gene12777	1487	1283	1526	2249	2178	2949	9.73115	9.49675	10.5332	17.0295	15.811	19.7684	0.00348045	1.18616	up
gene12782	107	49	57	1125	667	1408	1.69082	0.865033	0.941664	20.7268	11.7648	22.9585	2.65518e-12	4.32642	up
gene12787	903	747	744	1752	1979	2551	20.3359	19.027	17.6655	45.6738	49.4641	58.8676	1.20377e-06	1.79843	up
gene12791	293	1041	1528	1602	1937	1768	4.45942	11.0374	13.5041	15.5345	21.3084	16.1064	0.00442554	1.28328	up
gene12811	658	875	1046	2345	2799	3617	2.88358	6.14505	8.46299	16.4098	14.2961	15.8018	4.26257e-09	2.15936	up
gene12844	44	51	12	143	269	269	0.14695	0.191745	0.039371	0.554836	1.00152	0.925918	8.06243e-07	3.05772	up
gene12863	817	1007	823	1846	3896	2811	7.18681	8.86254	5.62339	18.7428	28.4361	25.3715	0.00346994	2.09952	up
gene12869	18	36	42	163	176	215	0.183952	0.424089	0.468381	2.07434	2.60232	2.58257	5.76085e-06	2.91621	up
gene12917	511	1053	535	2832	3637	2907	3.30528	7.70202	3.65015	21.2034	26.0957	19.2586	3.66574e-12	2.54034	up
gene1292	190	157	163	510	738	536	2.91193	2.53582	2.45672	8.44864	11.7284	7.86598	3.1118e-07	2.22909	up
gene12935	850	816	1040	399	85	264	4.13555	3.10685	3.46949	1.71403	0.886808	0.830744	0.000774848	-1.45943	down
gene13012	146	217	112	10925	32851	32753	1.27912	2.15274	1.01928	110.741	317.751	292.939	5.37112e-10	7.71673	up
gene13052	2210	1751	1493	3378	2620	4943	18.2522	16.8442	13.3701	33.2304	23.9949	43.0433	0.000867819	1.40205	up
gene13059	190	93	87	5	0	7	3.43481	1.90596	1.66128	0.08515	0	0.11304	1.35339e-06	-4.55872	down
gene13117	111	91	100	11	13	14	1.35365	1.25047	1.28973	0.14351	0.165371	0.174914	0.001736	-2.57761	down
gene13118	466	410	461	39	20	23	5.01731	4.82693	4.59681	0.418897	0.207829	0.216114	6.63231e-11	-3.61561	down
gene13158	2166	2824	1213	3823	3797	3301	14.2594	24.0904	8.40823	27.6316	26.2363	22.5091	0.0034823	1.20839	up
gene13178	177	163	285	925	1380	1609	1.0477	1.09811	1.78614	6.3695	9.09995	9.79861	9.05334e-12	3.05878	up
gene13181	297	260	260	1702	2000	1737	1.63017	1.4614	1.33866	12.5438	14.3318	11.5064	1.42655e-17	3.15058	up
gene13193	383	970	893	5373	5265	6878	1.73873	4.16514	3.53881	30.9597	22.0953	27.422	5.13081e-18	3.3389	up
gene13250	2096	868	1138	6376	8232	6936	9.24485	4.32779	5.29371	32.5382	40.2761	31.3387	1.77377e-12	2.83545	up
gene13261	1282	1296	1069	294	400	550	5.12867	6.60046	4.93761	1.44786	1.87565	2.48208	0.00725423	-1.1563	down
gene13303	2476	2128	2670	5786	6103	5349	29.81	28.9847	33.9101	80.6271	81.5066	65.9658	5.10792e-05	1.66324	up
gene13304	331	369	340	83	50	69	1.89006	2.38026	2.04921	0.546145	0.313922	0.402096	0.000810583	-1.96707	down
gene13324	83	56	56	253	245	263	0.589392	0.449753	0.415119	2.08918	1.93797	1.91732	4.66954e-05	2.38343	up
gene13363	421	411	467	727	956	1050	1.95894	2.07963	2.23176	3.70091	5.01904	4.75645	0.000217731	1.48023	up
gene13365	329	201	90	1318	5238	3367	2.53845	1.849	2.14578	10.8159	40.9444	24.2082	0.00317474	4.4335	up
gene1339	352	315	320	732	965	1164	1.57488	1.58072	1.4981	3.8072	4.80548	5.36259	5.29324e-07	1.94114	up
gene1343	363	355	206	766	1152	913	2.84224	3.11378	1.7194	6.91319	9.72993	7.35869	8.74045e-07	2.02406	up
gene13432	3985	4268	4179	11376	14426	10982	37.662	45.637	41.663	124.428	151.235	106.312	9.27987e-06	1.9775	up
gene13448	1774	1614	1241	3247	4065	4180	7.04365	7.25089	5.18184	14.8914	17.2915	16.921	8.98011e-06	1.7189	up
gene1345	885	775	745	1143	1445	1347	7.10338	7.18102	6.60755	10.8476	13.0306	10.9485	0.00659106	1.12361	up
gene13450	1286	934	984	1980	3007	2959	9.05469	7.42107	7.27616	16.0659	23.3878	21.2856	5.14054e-06	1.72887	up
gene13474	568	400	542	1047	1703	1578	6.05677	4.79433	6.057	12.8868	20.0697	17.289	2.65394e-06	1.94237	up
gene13512	245	886	1470	2070	1328	1751	3.17743	12.4663	20.0156	32.4421	19.6469	24.5622	0.00982287	1.37315	up
gene13567	191	217	109	301	409	422	1.93998	2.5024	1.37386	4.24269	4.62075	4.40013	0.00308665	1.52493	up
gene13602	11	2	20	39	93	57	0.403798	0.045925	0.848478	1.77929	4.12826	2.33394	0.00456736	2.9851	up
gene1362	3	3	3	98	152	123	0.038188	0.042772	0.040279	2.11528	3.17122	2.35909	3.87003e-12	5.78639	up
gene13626	138	100	75	718	671	1861	1.58492	1.30561	0.90227	9.59398	8.59074	22.0153	0.00297123	3.76363	up
gene13628	1340	817	1018	3334	8019	8611	14.4314	9.78818	11.4385	41.2179	104.809	94.3692	0.000303276	3.07461	up
gene13637	1884	1624	1694	499	364	437	30.2785	29.5249	28.7122	9.28038	6.47217	7.19178	3.2047e-05	-1.59131	down
gene1365	414	422	399	682	1006	754	3.38118	3.86619	3.42449	6.39727	9.15418	6.32834	0.000756332	1.39759	up
gene13653	275	235	183	982	1675	1535	4.05564	3.85033	3.00679	17.559	29.7386	25.3357	2.27918e-09	3.00898	up
gene13655	4	6	11	43	118	172	0.055844	0.095866	0.18826	0.814447	2.13376	2.88161	0.000684257	4.38109	up
gene13715	253	270	336	572	828	901	3.09031	3.77109	4.66362	8.80352	12.021	11.9553	6.37997e-06	1.82744	up
gene13726	37	43	33	159	126	123	0.990399	1.29646	0.919202	4.96795	3.76675	3.38543	0.00150607	2.2531	up
gene13731	83	111	93	615	879	2218	0.999614	1.47555	1.14424	8.46492	11.574	26.9685	0.00723765	4.06093	up
gene13734	486	465	332	878	1579	1608	6.92885	8.30967	5.95564	15.0599	26.0526	25.1854	6.73118e-05	2.06793	up
gene13776	1747	2534	1781	7090	14042	7266	13.3273	21.1473	14.6992	60.9312	116.052	61.1684	0.00461949	2.6367	up
gene13778	750	464	701	927	1080	1162	12.8668	8.9937	12.6726	18.4033	20.5488	20.4179	0.00641954	1.15083	up
gene13801	694	518	917	4756	14851	7249	6.15273	7.43727	7.66481	47.4357	137.847	60.8442	0.00659681	4.09957	up
gene13818	0	0	0	676	1544	1740	0	0	0	26.258	58.4115	59.5369	1.89326e-20	Inf	up
gene13819	0	9	0	337	553	803	0	0.285027	0	8.37268	5.64671	16.8051	3.29919e-16	7.82756	up
gene13835	47	7	31	1468	160	2132	0.266696	0.0348	0.201273	11.0437	1.06189	14.133	0.00506028	5.89023	up
gene13861	365	220	276	442	644	805	4.55626	3.09713	3.6372	6.38799	8.92135	10.2925	0.0003609	1.55384	up
gene13882	4527	3472	3404	1136	1001	1366	32.9921	28.6267	26.1635	9.57583	8.08586	10.1956	0.00134188	-1.2944	down
gene13889	1570	1421	1448	3892	6529	3863	14.7448	15.0426	14.0666	42.2961	66.3929	37.182	0.00136982	2.11094	up
gene13896	915	822	748	1940	1466	1657	13.0829	13.2931	11.2821	32.1174	23.2663	24.2821	0.000183201	1.43463	up
gene13905	2995	1962	2793	10814	16637	14266	24.4394	18.1109	24.0401	102.112	150.571	119.216	9.30929e-11	2.85638	up
gene13908	4092	3470	3795	29602	40252	44844	70.5198	67.6558	68.9735	590.316	769.359	791.453	8.74219e-13	3.74666	up
gene13923	3495	2575	2823	4406	5248	5569	35.355	29.4955	30.0857	51.5334	58.9075	58.353	0.00693229	1.19215	up
gene13950	228	256	272	657	1314	1140	0.401023	0.815524	0.503982	2.18732	3.80851	2.96935	8.40179e-05	2.44951	up
gene13953	720	568	737	1087	1097	1309	7.07565	6.40962	7.88255	12.6717	12.0452	13.2422	0.00332292	1.19979	up
gene13974	1205	1163	1140	3830	4567	3047	11.3948	12.4347	11.3672	41.9092	47.8941	29.4997	1.50914e-07	2.12472	up
gene13985	96	76	148	657	880	1522	0.387341	0.34207	0.626466	3.78221	5.47516	7.85034	3.58108e-06	3.66212	up
gene14022	745	1142	858	8181	14265	7647	7.80966	13.5484	9.48457	99.3176	165.989	82.1574	6.37997e-06	3.86151	up
gene14036	287	161	380	28	21	50	1.47383	0.964188	2.03454	0.157866	0.112294	0.251641	9.43789e-05	-2.65488	down
gene14039	103	76	103	471	422	411	0.816384	0.681435	0.834444	4.28234	3.66665	3.33497	6.59525e-08	2.63042	up
gene14060	32	9	0	71	137	82	0.278856	0.08025	0	0.714425	1.32401	0.727251	0.000231552	3.28821	up
gene14062	202	132	116	1109	633	546	1.78883	1.32253	1.08835	11.5104	6.28605	4.97804	0.000393581	2.77123	up
gene14078	157	127	113	27	5	34	1.00659	0.916786	0.761324	0.194718	0.028834	0.221209	0.00583195	-2.2079	down
gene14096	101	59	100	11	10	8	0.486977	0.319254	0.506062	0.060088	0.052811	0.035069	0.00111792	-2.72999	down
gene14105	383	262	263	25	9	42	3.06975	2.37481	2.22497	0.231872	0.07174	0.339663	2.92331e-07	-3.19147	down
gene14109	317	337	354	89	90	61	3.6026	4.02474	3.75543	1.06479	1.07344	0.682124	0.00592726	-1.65422	down
gene14111	904	889	800	2370	8453	8224	10.2214	11.3704	9.52984	31.0012	105.993	95.2227	0.00557487	3.28336	up
gene14117	2108	1539	2061	5052	6363	6640	5.01311	4.11942	5.15513	13.7924	16.644	16.9046	1.70466e-07	2.08035	up
gene14122	48	91	58	2936	4895	3749	0.471039	1.13624	0.656957	36.8546	60.3251	39.2717	6.00695e-22	6.26604	up
gene14130	73	40	114	526	381	652	0.688349	0.437454	1.00675	7.41939	7.67369	8.23254	7.51889e-12	3.20032	up
gene14132	1173	874	1107	1749	1571	1673	4.64162	3.91306	4.64934	8.01284	6.96602	6.90418	0.00969348	1.0808	up
gene14134	506	725	990	1979	1359	1902	3.00289	5.74857	6.2748	21.9745	10.4575	18.3508	1.11993e-05	1.63415	up
gene14150	29	48	39	177	145	283	0.195983	0.362489	0.275102	1.47809	1.34455	2.37792	9.1162e-06	2.75528	up
gene14180	558	355	622	2986	3446	7493	3.57378	2.57122	4.20379	22.1463	24.4949	49.1806	0.000379236	3.58499	up
gene14183	680	688	663	921	1032	1325	2.86801	3.34542	2.55668	3.89842	4.60882	4.98159	0.00866855	1.0906	up
gene14212	525	527	474	56	78	129	6.75749	5.99267	6.21086	0.629128	0.745305	1.399	2.65237e-05	-2.14573	down
gene14227	314	608	435	113	66	83	1.17307	3.08384	2.73338	0.485381	0.327101	0.316027	0.00877109	-1.99339	down
gene14230	507	591	496	678	1046	1344	2.00234	2.62605	2.05503	3.08374	4.60091	5.42394	0.00477949	1.33734	up
gene14259	1136	857	939	1354	2049	1924	13.1743	11.0724	12.1881	19.1776	28.288	23.2807	0.00128473	1.2804	up
gene14261	352	340	379	8189	25976	14423	2.96787	3.24244	3.36639	80.032	243.472	124.661	5.84646e-05	5.93048	up
gene14289	673	615	567	181	160	188	2.38051	2.46226	2.1156	0.741209	0.625266	0.681244	0.00420539	-1.4041	down
gene14308	3	23	18	163	123	224	0.017282	0.216255	0.156405	1.6108	1.16553	2.41853	9.53071e-09	3.88238	up
gene14338	511	446	607	84	163	69	1.8754	1.80747	2.41336	0.339164	0.67899	0.265209	0.000161365	-1.86986	down
gene14350	369	404	375	691	934	1233	1.18054	1.40919	1.20551	2.41569	3.80434	4.62935	1.04183e-05	1.71147	up
gene14361	362	249	247	2315	4033	3189	3.14535	2.4497	2.26436	23.3272	38.9576	28.4464	5.39851e-11	3.90052	up
gene1439	12	3	7	61	81	158	0.128814	0.035686	0.071012	0.775479	0.992823	1.78355	4.74822e-05	4.20192	up
gene14392	321	237	263	367	661	707	1.65962	1.73862	1.77448	2.60616	2.74599	2.77374	0.0032262	1.49513	up
gene14404	12	11	10	93	93	86	0.104192	0.107004	0.092261	0.998687	0.964318	0.822807	1.10177e-05	3.45474	up
gene14437	928	946	1120	1534	2726	2847	5.21557	6.27785	7.03592	10.1778	16.628	15.3973	0.000733231	1.65451	up
gene14462	410	407	562	1180	1586	1282	3.47398	2.9693	3.80938	8.81461	22.269	14.7776	1.40505e-07	1.97124	up
gene14512	1088	697	1054	2959	4226	4015	10.784	7.85452	11.0353	33.9834	46.7642	40.8406	1.6976e-10	2.40633	up
gene14515	3417	2309	3484	14367	10733	10255	35.7178	27.3106	38.4119	173.811	124.45	109.796	5.35895e-08	2.3661	up
gene14541	643	491	505	748	988	990	5.39138	4.72773	4.51574	7.23161	9.2813	8.69165	0.00708863	1.15032	up
gene14555	1798	1641	1562	3507	4450	5221	6.29048	6.4675	5.49733	13.9557	16.3299	17.3365	3.46629e-06	1.80318	up
gene14557	509	439	414	11897	21851	23064	3.66835	3.79199	2.98464	110.967	182.478	180.001	1.284e-16	5.79184	up
gene14567	3	9	6	445	937	905	0.037851	0.171867	0.100145	9.64685	19.4538	17.3581	3.70617e-16	7.36084	up
gene14571	785	606	561	3836	4417	5317	6.1891	5.3947	4.65893	34.9916	38.6368	42.9489	3.18191e-17	3.20758	up
gene14592	151	110	148	646	1327	1259	1.15618	0.996403	1.25645	6.08997	11.8858	10.4146	9.55806e-07	3.40348	up
gene14596	171	152	172	2630	1747	3319	1.72918	1.51471	1.68762	22.4086	13.1245	23.5372	1.66753e-17	4.35618	up
gene14597	57	50	56	314	157	461	0.429241	0.35903	0.407063	2.39258	1.22861	3.77359	0.000845984	2.90395	up
gene14600	134	172	132	659	1221	1074	0.745436	1.08134	0.774714	4.2422	7.53629	6.12041	7.96815e-08	3.15321	up
gene14678	725	609	730	1226	1841	2198	5.87581	5.57978	6.20008	11.9159	17.5823	19.1166	1.28867e-05	1.7604	up
gene1469	401	334	324	802	1436	1410	5.81342	5.38857	4.92424	14.0645	23.5797	22.4485	1.58349e-05	2.19751	up
gene14700	535	549	422	4537	3845	10770	10.2648	11.9237	8.53553	100.873	81.9462	211.967	0.00074374	4.04437	up
gene14711	717	570	659	1246	1608	1529	9.40082	8.4565	9.11153	18.9149	23.396	20.5416	3.12908e-05	1.58903	up
gene14722	109	274	104	801	1156	972	0.555053	2.01015	0.47593	4.56955	6.23062	4.84252	2.29854e-13	2.95722	up
gene14746	7	0	0	7770	11467	13069	0.055065	0	0	81.4384	115.167	121.2	5.73507e-70	12.6709	up
gene14769	81	99	102	1906	9072	4690	1.04285	1.33228	1.43282	35.2853	140.371	77.6551	0.00133837	6.21778	up
gene14796	1696	1399	1551	2180	2450	2817	24.7596	23.0987	23.8817	36.8215	39.6599	42.1018	0.00924438	1.09172	up
gene14803	5811	4063	5005	7588	9569	9101	19.385	15.391	17.6674	29.3443	35.3472	31.0863	0.00965638	1.24168	up
gene14836	822	709	977	2918	3283	3728	4.82516	4.93737	6.41641	24.5771	26.515	27.5214	1.07635e-10	2.3975	up
gene14840	1453	1240	1548	412	280	268	14.3039	15.6178	16.3329	5.14674	3.01362	2.93935	7.14137e-06	-1.72629	down
gene14842	1290	1313	1519	1880	3096	2786	5.8577	6.32313	6.84824	8.63682	14.5077	10.8043	0.000961708	1.32468	up
gene14861	252	329	273	85	34	55	2.16918	3.2884	2.60613	0.862054	0.272085	0.392246	0.0027095	-1.90576	down
gene14867	89	79	65	211	469	342	0.818427	0.814781	0.629817	2.23863	4.77229	3.183	0.00114617	2.55107	up
gene14911	466	446	564	3114	5576	4292	2.5881	2.8073	3.30733	20.0479	34.4152	24.4607	7.12538e-09	3.55564	up
gene14917	2205	1937	1924	3003	4265	3790	17.7138	17.6089	16.3055	27.9196	38.0152	31.1928	0.00204215	1.281	up
gene14926	654	338	623	170	114	174	5.75094	2.59716	5.13245	1.92919	1.03087	1.17744	0.0067984	-1.39501	down
gene14944	17	5	6	574	1609	1772	0.088377	0.024903	0.034396	3.69361	9.86884	10.0876	6.84818e-10	7.58689	up
gene15004	608	903	423	1476	2611	2742	2.41217	4.53327	1.75019	6.6871	11.3682	10.9992	3.95652e-05	2.20266	up
gene15009	650	573	615	1382	2256	2413	3.22639	3.30983	3.26229	8.02202	12.4974	12.5021	1.3762e-06	2.12893	up
gene15014	413	297	244	80	30	66	3.22113	3.30605	2.11518	0.689563	0.326148	0.50555	0.000764288	-2.03579	down
gene15032	1123	1233	860	356	226	316	4.94285	6.13485	3.93213	1.78036	1.05344	1.39522	0.000516662	-1.44699	down
gene15072	818	773	678	4741	5431	7455	12.9463	13.826	11.3166	86.8204	95.332	120.831	5.7751e-18	3.35671	up
gene15082	0	0	0	150	591	313	0	0	0	2.22616	8.43222	4.12018	4.97326e-07	Inf	up
gene15087	12	6	3	576	2740	1945	0.356001	0.152223	0.042387	19.5039	97.8261	60.1282	2.46829e-06	8.40762	up
gene15088	8	22	0	443	874	658	0.148891	0.484103	0	12.7249	24.6844	15.9384	2.66914e-14	6.38771	up
gene15098	286	169	275	697	1373	1357	2.73824	1.82568	2.77722	7.73988	14.6188	13.3378	2.21816e-05	2.65854	up
gene15099	849	1020	1103	1751	2955	3726	8.94585	12.0928	12.1875	21.2319	34.5263	40.6916	0.000588776	1.90022	up
gene15116	334	277	360	26	50	38	4.528	4.84501	5.47484	0.395091	0.853021	0.470854	6.84741e-06	-2.66678	down
gene15147	744	868	750	2572	2842	1864	12.6892	19.0105	14.2307	51.1092	56.312	35.0462	9.31806e-07	2.03512	up
gene15184	1980	1389	1768	4283	5320	3240	20.717	16.4439	19.5068	51.8539	61.7349	34.7198	0.000238271	1.75553	up
gene15211	311	216	250	4634	9527	9212	1.95415	1.44358	1.65698	33.1437	66.4032	58.6737	7.25361e-12	5.33165	up
gene15220	1186	1095	983	2899	4445	5628	11.7487	12.4421	10.7363	33.3236	48.7561	57.5711	1.2106e-06	2.39219	up
gene15246	3372	2958	2277	5377	7195	6123	34.4104	34.3537	24.6997	62.9652	81.0211	63.4068	0.000272619	1.53253	up
gene1525	437	711	639	9	17	18	3.78444	6.96873	5.84126	0.081316	0.155877	0.152869	4.52783e-14	-4.9542	down
gene153	552	421	481	11043	19743	16820	4.82348	4.15279	4.42867	112.145	192.529	151.393	4.54374e-17	5.45471	up
gene15301	48	61	70	3	0	5	0.467107	0.675328	0.729365	0.023153	0	0.04112	1.18933e-05	-4.12832	down
gene15324	176	267	249	434	395	475	1.97547	3.41429	2.94429	5.62885	4.83838	5.47903	0.00879686	1.30441	up
gene15332	108	94	83	228	209	238	0.756569	0.750149	0.609638	1.97243	1.66717	1.71767	0.00856578	1.6518	up
gene15360	0	0	0	676	3289	1257	0	0	0	19.6377	90.4293	31.6915	3.13961e-06	Inf	up
gene15361	0	3	0	816	891	612	0	0.054903	0	22.7982	23.8604	15.1246	9.5106e-46	9.88792	up
gene15368	42	52	77	481	484	703	0.435397	0.607552	0.844752	5.814	5.59843	7.51993	2.20767e-15	3.68371	up
gene15383	1331	1173	1161	8102	19334	22300	22.044	21.9716	20.2776	155.278	355.184	378.28	7.11101e-06	4.16837	up
gene15409	377	217	283	630	959	1288	3.30256	2.13629	2.56559	6.36925	9.24184	11.4205	6.51706e-05	2.13205	up
gene15419	97	103	140	405	421	854	0.681898	0.974042	1.365	4.60908	4.25167	8.39101	0.000354597	2.69487	up
gene15423	649	521	512	1242	2108	2185	10.5493	9.57843	8.77064	23.3585	38.0037	36.3763	5.50024e-06	2.1313	up
gene15433	317	322	309	914	1259	1789	1.6989	2.29856	2.03204	5.77405	8.34922	10.0862	1.1719e-06	2.4593	up
gene15448	637	514	462	2521	4596	7279	6.91562	6.31195	5.29346	31.6839	55.379	80.9816	0.000162671	3.55627	up
gene1545	176	177	219	624	653	370	0.929188	1.83032	1.50788	6.58716	5.09024	3.11167	0.000396238	1.94956	up
gene15498	334	560	485	3039	1867	6504	2.68019	5.08342	4.10968	28.2771	17.1866	54.5186	0.00773793	3.408	up
gene15573	593	554	497	1456	1508	1751	4.97385	5.31326	4.40679	16.3783	15.9945	14.6119	1.83668e-07	1.92484	up
gene15608	7	8	13	214	274	265	0.101128	0.129907	0.207324	3.99862	4.91744	4.38985	3.06071e-15	5.16093	up
gene1566	1682	1169	1645	1999	3170	2592	10.1738	7.51351	9.47233	13.8244	19.4534	14.8095	0.00339999	1.21509	up
gene15712	76	40	37	2952	3064	3979	1.12574	0.667405	0.573	50.7987	50.5342	60.6	2.89636e-52	6.45148	up
gene15730	909	626	735	1261	1467	1483	9.93313	7.47876	8.36636	16.0222	18.841	16.0457	0.000949782	1.31222	up
gene15731	479	453	422	789	1222	1284	3.14837	3.54439	3.01454	6.15687	9.65071	9.3158	1.07472e-05	1.68979	up
gene15743	1415	1859	1546	2198	3004	2609	9.0603	15.4529	10.0558	17.1692	15.3852	11.1482	0.00848509	1.09701	up
gene15752	864	887	756	50	89	103	7.52808	8.98385	7.06675	0.527407	0.892593	0.997543	9.6686e-12	-2.97306	down
gene15782	127	111	108	2087	3311	2914	2.0597	2.03372	1.85074	39.4503	59.9924	48.7457	2.05958e-22	5.00123	up
gene15787	870	405	568	186	99	81	6.74238	3.6837	4.9068	1.73217	0.819623	0.606368	0.000884327	-1.89229	down
gene15809	150	114	174	27	21	27	1.32943	1.19952	1.83535	0.253149	0.188039	0.234206	0.00566355	-2.13115	down
gene15826	1043	990	1110	2156	2543	2033	3.55305	3.86932	3.47204	11.1959	12.7279	6.55732	8.27386e-05	1.51544	up
gene15896	236	236	251	366	707	657	5.97468	4.64485	4.32132	6.3246	14.0201	17.9542	0.00235146	1.66866	up
gene15915	1159	659	635	1555	1718	1624	4.2209	3.08427	2.73629	9.33259	11.2987	6.35619	0.000263868	1.42521	up
gene15917	427	350	563	5114	10800	6383	5.02186	4.69685	7.04582	70.2533	141.092	77.2118	3.61946e-06	4.48978	up
gene15961	339	372	361	102	55	112	3.05739	3.39754	2.9265	1.03861	0.432526	0.990403	0.00773793	-1.60558	down
gene15969	745	749	497	2229	2019	1903	26.1094	23.9676	16.2687	90.3441	63.7614	55.6022	3.01003e-08	2.03212	up
gene15982	707	466	541	803	1407	1373	4.91995	3.6684	3.97066	6.45887	10.8585	9.78163	0.00150519	1.48628	up
gene15995	607	584	553	3380	7796	5505	1.57685	1.92286	1.70631	11.607	24.9534	15.6291	3.59415e-05	3.67558	up
gene16002	0	3	3	114	101	53	0	0.026279	0.0245	1.56794	1.34097	0.755083	1.13998e-09	5.85791	up
gene16063	597	514	542	767	1303	1566	4.16766	4.58878	3.59269	6.12371	10.4487	10.6183	0.00235146	1.54406	up
gene16076	92	94	96	345	598	369	0.89245	1.03889	0.997158	3.31016	6.16618	3.75615	0.000104233	2.63815	up
gene16077	2328	2739	2468	832	522	748	17.2445	22.9494	19.2832	7.12776	4.28362	5.6692	0.000194753	-1.44785	down
gene16094	5	13	15	464	439	375	0.072377	0.245653	0.265538	9.57921	8.68164	6.83841	2.22094e-23	5.66729	up
gene16116	240	207	300	441	1003	1275	0.840954	0.801318	1.06909	1.66928	3.82018	4.50989	0.00780719	2.27161	up
gene16118	2229	2007	1788	3043	3726	3949	10.377	11.5658	8.79454	16.3492	19.4106	20.1161	0.00282494	1.23932	up
gene16143	510	406	438	515	825	960	7.06449	7.30844	6.05296	8.80433	13.2627	17.3781	0.00690013	1.17505	up
gene16147	229	205	193	21	9	22	3.58285	3.6005	3.16211	0.353252	0.141304	0.347357	3.94564e-06	-3.19951	down
gene16162	217	259	195	9578	14775	14438	2.83737	3.81997	2.67796	145.784	215.711	195.101	1.36497e-34	6.25196	up
gene16203	813	887	791	1991	2465	2608	7.96022	9.82602	8.28904	22.5075	26.9222	26.3062	2.41386e-07	1.90565	up
gene16233	2271	2165	2125	3192	4045	4691	9.96207	10.7428	9.82898	16.201	19.6791	21.0716	0.00226676	1.26699	up
gene16239	81	32	86	4	0	20	0.627208	0.460764	0.922764	0.056886	0	0.165575	0.00474791	-2.67635	down
gene16245	3	3	7	783	1986	937	0.013757	0.01572	0.043532	6.1484	14.9424	6.50886	4.00842e-08	8.59483	up
gene16289	287	233	236	81	33	49	0.89266	0.819464	0.773191	0.291307	0.110484	0.15601	0.00661906	-1.80491	down
gene16335	1267	1039	1093	1864	2530	2922	9.93221	9.35723	9.15092	16.3621	21.4436	22.914	7.78104e-05	1.51603	up
gene16343	168	106	181	13	34	37	0.766107	0.532432	0.893065	0.063411	0.162113	0.160641	0.00849831	-2.01479	down
gene16352	1279	835	979	496	254	286	7.98208	5.11988	6.61259	3.00447	1.51877	1.55712	0.00753148	-1.15615	down
gene16363	959	629	752	2339	2243	2448	9.81304	7.06359	8.25711	29.9632	25.7999	27.0363	6.15728e-08	2.0078	up
gene16383	1577	1436	1317	4471	5910	7713	11.5338	11.878	10.1555	37.8438	47.9438	57.7734	2.95915e-10	2.46481	up
gene16457	52	59	46	137	168	242	0.443049	0.57295	0.417878	1.37328	1.61736	2.14601	0.000690745	2.1907	up
gene16479	842	640	585	2101	1521	1848	2.82495	2.44093	2.07075	8.17437	5.67079	6.3607	9.88347e-07	1.81592	up
gene1648	169	174	118	241	424	352	1.38774	2.11089	1.35798	3.68535	6.7275	4.14956	0.00428748	1.54857	up
gene1653	284	205	254	15563	9834	13467	4.492	3.74431	3.93419	283.262	171.963	217.907	2.0594e-38	6.12265	up
gene16546	560	570	708	879	1099	1111	13.778	17.1668	19.5124	24.9004	31.1413	30.9309	0.00540017	1.15857	up
gene16565	2	0	2	39	58	75	0.032858	0	0.025263	0.793834	1.13181	1.35878	3.36648e-09	5.89191	up
gene16574	27	12	22	14268	27325	12003	0.553777	0.286932	0.491126	350.916	644.113	261.266	3.29916e-13	10.237	up
gene16579	190	211	158	420	480	526	0.78751	0.989331	0.689994	2.0179	2.21207	2.23841	0.000174946	1.74935	up
gene16589	2525	2453	2462	6407	5919	9636	58.7321	64.5545	60.3982	172.472	152.716	229.565	1.34742e-06	1.95738	up
gene16603	304	248	188	408	729	536	2.23494	2.26918	2.11973	3.64843	5.36742	3.75794	0.0043407	1.5968	up
gene16641	83	80	66	207	181	370	0.571274	0.620087	0.478956	1.63997	1.38123	2.61003	0.000491196	2.11435	up
gene16644	1140	1234	937	2104	2664	3353	7.01034	8.57209	6.07691	14.9679	18.1875	21.1243	6.57061e-06	1.68945	up
gene16677	2735	1764	1870	785	649	840	13.2463	9.66852	9.54555	4.39274	3.48018	4.16764	0.00982287	-1.06937	down
gene16686	2249	2175	1803	12187	17866	15272	21.3964	23.4166	18.0895	134.202	188.575	148.848	1.58367e-13	3.27438	up
gene16711	4949	4948	4569	7839	11772	11083	52.7508	59.7176	51.4126	96.7959	139.268	117.816	0.00112553	1.49339	up
gene16731	507	694	830	168	127	145	6.03048	9.55485	10.8709	2.3977	1.75743	1.83323	8.75798e-05	-1.80735	down
gene16742	2464	2010	2079	3249	3744	5762	17.563	16.2799	15.6332	27.032	29.8768	42.0648	0.00081181	1.36298	up
gene16752	677	1241	711	162	77	86	2.03974	4.22991	2.25756	0.562626	0.254734	0.262958	0.00312285	-2.63575	down
gene16780	473	410	682	706	1008	915	9.21043	9.04189	13.9895	16.3683	22.5478	18.7385	0.00655885	1.16863	up
gene16781	0	7	0	360	674	652	0	0.066458	0	4.02024	7.21086	6.44459	9.05044e-23	8.19646	up
gene16793	3749	3559	4537	1136	683	746	13.0907	13.5806	16.1993	4.53492	2.61151	2.63651	1.93869e-06	-1.79572	down
gene16842	739	292	475	1021	1299	1296	4.07908	1.67256	2.42847	5.62537	11.3489	7.87807	1.13033e-05	1.70351	up
gene16847	527	328	442	13673	21979	10914	3.83241	2.6654	3.39553	113.217	174.494	80.0599	3.57514e-09	5.60902	up
gene16859	20	43	35	122	312	390	0.098569	0.319102	0.211669	0.754951	1.82557	2.12861	0.000625501	3.44668	up
gene16869	1466	1488	1144	2078	2719	4047	7.75601	8.99861	6.06566	11.5778	14.5597	20.929	0.00159718	1.502	up
gene16907	1592	1392	1392	2460	2946	2699	22.8887	22.3991	20.719	41.5073	47.4349	39.2701	0.00116775	1.30346	up
gene16913	1190	1252	852	14429	18635	21405	31.5598	37.553	23.8193	442.786	548.121	581.35	1.14409e-21	4.44492	up
gene16933	0	0	0	87	197	209	0	0	0	0.988843	2.14348	2.1152	3.37596e-14	Inf	up
gene16934	1623	1110	1326	2502	2325	2249	17.6143	14.0699	15.5024	32.4321	28.786	24.8488	0.002733	1.22444	up
gene16955	2457	2430	2089	4965	6370	4257	18.2749	20.5015	16.3952	43.0876	52.5725	32.4975	0.000121237	1.57695	up
gene16995	2912	1722	2839	8273	10959	11166	46.9547	31.4063	48.2924	154.386	196.005	184.418	7.04137e-09	2.45153	up
gene17011	1322	1196	1230	1783	2128	2259	14.6329	14.9798	14.3691	22.8465	26.1385	25.6141	0.00594949	1.12861	up
gene17040	2514	2676	2051	5778	12543	14350	31.8557	38.368	27.4131	84.7452	176.335	186.272	0.000625365	2.57106	up
gene1706	855	365	387	1267	1248	1334	8.2046	4.16005	3.71096	14.1538	14.8035	13.2649	1.06669e-05	1.69528	up
gene17060	980	1032	971	151	184	271	6.96339	8.74101	7.2962	1.4763	1.41546	2.0789	3.62121e-06	-1.90531	down
gene17066	188	181	158	432	900	700	1.1724	1.27931	1.04129	3.12656	6.24768	4.4861	0.00055588	2.36108	up
gene17087	55	21	52	280	96	211	0.599309	0.260023	0.599964	3.54253	1.16253	2.36863	0.00522147	2.62528	up
gene1709	538	342	249	1017	802	1421	12.2592	8.67365	6.10011	29.825	19.6698	37.2273	1.52331e-06	1.9273	up
gene17115	384	328	426	1379	2419	3287	3.52396	3.33555	4.60255	14.8618	24.6423	27.3702	1.8572e-05	3.04358	up
gene17142	539	729	776	2499	4225	5324	3.2921	5.18048	4.82872	16.8751	28.3948	31.7808	1.10969e-06	2.95169	up
gene17160	734	536	837	1490	2086	2378	6.6429	5.49273	7.99977	15.6156	20.9647	22.0652	2.30773e-07	1.91627	up
gene1718	46	26	76	536	976	574	0.551092	0.344351	0.94507	9.54666	15.9656	9.07834	4.40989e-07	4.26405	up
gene1721	282	241	190	732	662	829	6.7314	6.50901	4.78035	20.3199	17.6234	20.3783	4.7986e-07	2.04547	up
gene1727	71	17	60	217	446	501	0.987305	0.27183	0.847561	4.91585	6.46082	6.25971	6.85275e-06	3.42369	up
gene17284	149	203	244	428	762	640	1.45073	2.2394	2.50706	4.8401	8.2532	6.39995	8.87781e-05	2.02487	up
gene1730	79	48	78	139	208	188	1.73038	1.18541	1.8718	3.69482	5.32988	4.64246	0.00780247	1.81359	up
gene17350	94	66	90	153	258	218	1.18354	1.03116	1.35517	2.53947	4.39295	3.08639	0.00654904	1.75712	up
gene17355	199	188	191	305	460	491	6.44501	6.91529	6.54028	11.4561	16.5711	16.3445	0.00223523	1.52704	up
gene17367	74	76	67	1209	1475	2034	1.27498	2.09649	1.85025	19.1825	22.6355	28.4748	1.05203e-25	4.83842	up
gene17378	22	44	42	605	1340	955	0.345826	0.7771	0.688518	10.9988	23.3563	15.3627	2.12675e-08	5.1446	up
gene17416	351	370	352	131	72	57	2.12075	2.60263	2.04058	1.2199	0.505905	0.426161	0.00564108	-1.63363	down
gene17429	68	62	65	147	162	223	0.525184	0.518336	0.50355	1.28313	1.52066	1.93849	0.00571777	1.8502	up
gene17469	107	86	85	829	1291	619	0.891578	0.825997	0.750567	9.5768	13.4711	6.4146	2.25611e-05	3.73349	up
gene17481	50	35	46	228	308	280	0.979896	0.767136	0.953554	5.17157	6.70862	5.61821	1.1553e-07	3.06286	up
gene17502	5	5	3	104	123	166	0.022636	0.054914	0.011938	2.00001	2.02038	3.25114	2.30131e-11	5.31143	up
gene17503	150	225	137	853	526	1403	0.793202	1.34356	0.753847	5.20159	3.07002	7.56882	0.000608899	2.80596	up
gene17506	1615	1142	1746	2423	2634	2552	11.0695	8.85434	12.6198	19.2134	20.0243	17.9108	0.00454177	1.1802	up
gene17525	1199	704	656	1729	3007	3605	16.2317	10.8886	9.44637	28.6133	48.1056	54.3873	0.000201938	2.12344	up
gene17550	691	685	674	1348	1892	2548	8.42295	9.61005	8.33028	21.4841	27.9665	34.1205	1.83021e-05	1.8961	up
gene17556	704	844	607	45	53	63	5.70732	7.70428	4.76379	0.390889	0.418671	0.491486	6.02262e-13	-3.34971	down
gene17559	584	465	513	4411	5388	6937	4.55278	4.10308	4.22014	39.8335	46.6393	55.4483	1.53351e-22	3.83008	up
gene17575	1810	1422	1374	3017	3877	5311	8.75054	7.77545	6.87442	16.3059	20.0387	25.5964	2.53255e-06	1.81168	up
gene17599	263	291	279	597	967	606	1.23022	1.54312	1.37384	3.23623	5.08722	2.89492	0.00190588	1.79771	up
gene17635	24	22	25	453	165	463	0.285372	0.293014	0.31571	6.43598	2.24538	5.81895	5.87634e-06	4.32026	up
gene17638	75	119	95	23	17	3	0.940626	0.912696	0.709927	0.179175	0.127773	0.014133	0.00509122	-2.33172	down
gene17654	250	301	314	65	38	51	1.30101	1.77488	1.75972	0.390005	0.216598	0.27042	0.000783225	-2.09234	down
gene17665	9	78	41	154	214	372	0.08636	1.4056	0.644019	2.87843	3.48371	6.04395	0.000401803	2.86301	up
gene17687	220	115	288	483	405	311	2.13254	1.25931	2.94465	5.41207	4.35645	3.08898	0.00921177	1.38497	up
gene17688	580	403	478	1858	1951	1607	5.48208	4.65875	4.69756	22.7125	20.9528	15.3818	3.09084e-10	2.31624	up
gene17733	200	210	245	24	44	32	1.86156	2.21778	2.41018	0.247447	0.448464	0.298751	0.000652447	-2.29466	down
gene17748	802	671	873	6575	6595	12523	6.71019	6.3507	7.66382	63.3858	61.3188	106.887	1.94377e-08	3.85127	up
gene17755	1169	1024	1073	1406	1917	1951	12.7434	12.4227	12.3649	17.7245	23.6386	20.8661	0.00749933	1.10299	up
gene17758	489	833	597	1517	3931	5550	2.99183	5.62282	3.92798	10.9043	27.256	35.5295	0.00787474	2.89316	up
gene17763	1518	1092	1083	4932	11930	12775	11.2421	9.14817	8.45752	42.2765	98.0156	96.9189	8.77573e-05	3.41961	up
gene1779	100	95	79	1903	595	2255	0.719498	0.95594	0.584717	22.4545	7.01504	20.6155	0.000114023	4.49803	up
gene17796	108	102	129	5	0	0	0.639563	0.683835	0.805402	0.027937	0	0	1.16562e-09	-5.66536	down
gene1780	10	10	3	434	146	526	0.227655	0.306022	0.056869	13.7616	4.37217	14.1816	8.8906e-07	5.95868	up
gene1782	13	4	0	132	43	61	0.163275	0.046181	0	2.03866	0.625941	0.825405	0.00389288	4.23991	up
gene17824	12	14	10	50	42	66	0.097123	0.132852	0.09011	0.49717	0.397837	0.57834	0.00318931	2.521	up
gene17825	513	636	446	881	1151	1037	3.07174	4.37262	2.75403	5.5327	6.75795	5.55435	0.000743488	1.34317	up
gene17836	932	1986	748	4416	8778	8026	5.47108	12.9496	4.56516	33.9202	56.6361	50.8468	7.31437e-06	2.90437	up
gene17876	1453	2555	1637	14475	32447	73326	19.635	39.0599	23.3241	226.371	486.378	1014.95	0.00655885	4.76945	up
gene17898	301	288	252	615	1156	907	1.86661	1.95783	1.85572	5.20326	8.60186	7.04099	0.000299671	2.08499	up
gene17964	1107	576	987	1294	2218	2449	9.09631	7.46899	7.94839	12.2445	19.1358	23.7453	0.0015557	1.58705	up
gene18096	1172	852	926	1352	1810	1912	10.5755	8.55343	9.02562	14.2086	18.5575	17.8737	0.00300918	1.1993	up
gene18141	2360	1772	1671	810	699	392	9.17439	7.9725	6.89478	3.72624	3.12634	1.27928	0.00289996	-1.18045	down
gene18169	1144	793	627	4693	5120	5438	9.89054	9.07698	6.44085	54.0584	47.5362	56.0733	6.78161e-15	2.98891	up
gene18172	200	229	260	6	37	43	1.28702	1.67089	1.77076	0.041943	0.264986	0.279268	9.33852e-05	-2.60372	down
gene18191	408	433	439	7810	13012	8964	3.12969	3.75838	3.54583	69.3562	110.758	70.4481	1.43049e-13	4.95644	up
gene18213	164	140	125	15	9	18	2.07399	1.99791	1.66175	0.209217	0.113895	0.232995	0.000108761	-2.95674	down
gene18216	112	90	99	172	299	222	0.502692	0.460734	0.468519	0.893737	1.49754	1.03046	0.00995002	1.62663	up
gene18228	501	426	643	2088	3515	3644	2.96261	2.88028	4.07436	9.79485	15.3823	15.5607	3.32347e-09	2.97382	up
gene1825	144	153	120	662	1042	1083	1.44593	1.53018	1.98882	9.88529	15.3145	14.4916	2.16642e-12	3.1418	up
gene18286	510	559	462	18601	24029	28104	13.0724	16.2285	12.5068	552.424	683.975	738.686	2.83043e-31	5.92764	up
gene18306	965	882	771	2455	2747	4405	3.78927	3.9485	3.15933	11.1009	12.2756	18.1291	1.01463e-06	2.27124	up
gene18310	171	174	186	366	611	783	1.24694	1.23287	1.24558	2.72325	3.83619	5.28491	0.000164461	2.12868	up
gene18318	1683	1249	1671	12753	22400	25003	19.916	16.7222	20.8634	174.719	294.129	303.164	2.64661e-11	4.12392	up
gene18336	11	11	7	121	158	370	0.075529	0.085451	0.048167	1.04258	1.29811	2.81989	0.000294957	4.86093	up
gene1834	590	503	447	2003	2731	2307	4.29978	4.14496	3.44488	17.2379	22.4047	17.4849	1.01538e-12	2.60886	up
gene18368	1	1	1	111	78	77	0.000649	0.000308	2e-05	1.78395	1.19704	1.0962	3.41783e-12	6.87925	up
gene1837	358	360	307	851	1191	1089	4.1589	4.73982	3.77053	11.4686	15.3841	12.9863	1.25308e-07	2.01887	up
gene18409	28	57	39	253	326	826	0.21846	0.515265	0.325848	2.35067	2.90343	6.79801	0.00610978	3.8551	up
gene18446	1882	1746	1325	133	132	129	8.11356	8.51316	6.02332	0.66009	0.628433	0.566675	1.68026e-17	-3.24404	down
gene18463	0	21	18	38	62	112	0	0.23469	0.184747	0.43611	0.692394	1.15667	0.00673667	2.77978	up
gene18484	114	91	77	191	252	392	0.444393	0.417786	0.3314	0.89915	1.13844	1.63908	0.000510772	1.96621	up
gene18494	616	370	566	136	149	143	8.13548	5.50644	8.36431	2.06094	2.17337	1.92252	0.00571897	-1.43014	down
gene18518	370	251	466	18180	44655	67086	2.69596	2.22341	2.48171	115.401	266.853	383.787	4.00349e-08	7.31195	up
gene18542	1493	1141	1251	2	1	3	10.4262	9.01332	9.21439	0.008192	0.007015	0.014501	1.45634e-54	-8.94672	down
gene18545	1848	1570	1044	4662	2580	5036	19.7244	18.9554	11.7503	57.6183	30.5261	55.0388	9.26861e-05	1.85488	up
gene18560	1036	739	983	7893	11418	14987	5.2193	4.44297	4.62673	33.9979	42.6522	52.0092	9.8877e-14	4.04895	up
gene18562	931	609	612	220	268	192	8.67596	6.66405	6.02152	2.43447	2.85552	2.08314	0.00834718	-1.23184	down
gene18611	143	186	134	6	24	27	2.06867	3.22867	2.05784	0.084682	0.371079	0.388117	0.000432186	-2.63245	down
gene18648	67	133	125	613	1060	466	0.511293	1.16837	1.13945	5.50311	9.56334	3.9993	0.00174013	3.12736	up
gene187	796	775	706	19402	34866	43182	4.2038	4.6274	3.93169	118.612	204.469	233.88	4.70367e-14	5.81964	up
gene1870	194	285	303	418	578	536	4.37837	7.1542	7.09135	11.9077	14.267	12.1811	0.00350172	1.36989	up
gene18766	100	145	109	328	232	287	1.10603	1.81542	1.27422	4.33329	3.0272	3.39316	0.00385785	1.64673	up
gene188	0	0	0	53	101	67	0	0	0	0.748389	1.37859	0.841768	7.35605e-13	Inf	up
gene18864	189	144	124	1081	1540	1293	1.93881	1.92698	1.30112	14.7814	21.6114	15.0315	1.49967e-19	3.51815	up
gene18867	301	167	255	1896	1135	2715	2.79395	1.53259	2.46147	20.04	11.9192	26.4067	1.45934e-06	3.39926	up
gene18888	811	855	735	1390	1233	1646	3.30053	4.12641	3.16055	7.02226	6.88696	7.11065	0.00187299	1.22733	up
gene18891	3176	2834	2639	17271	23748	32715	22.7984	23.0497	20.0354	144.229	190.325	242.328	1.96421e-11	3.49251	up
gene18898	805	532	582	2402	3234	4174	4.48865	3.46251	3.53446	15.9017	20.7909	24.4623	2.29539e-11	2.76806	up
gene18899	974	778	1014	1466	1833	2012	8.7943	7.94599	9.65019	15.3023	18.3481	18.6199	0.00050812	1.35587	up
gene19037	35	6	14	65	61	147	0.592819	0.117932	0.248321	1.34197	1.18929	2.67725	0.00720979	2.74963	up
gene19076	158	269	164	25	7	29	1.0397	2.01336	1.14515	0.190496	0.047569	0.190785	0.000354592	-2.91884	down
gene19101	153	77	119	1054	1169	1402	1.30882	0.803968	1.06901	10.459	11.1145	12.31	2.32051e-22	3.80418	up
gene19127	64	75	63	1178	1328	2319	0.371973	0.489455	0.484699	7.96379	11.8363	16.007	2.03225e-12	4.96258	up
gene19180	18	10	9	200	210	269	0.180001	0.105466	0.084985	1.22467	1.32002	1.59259	1.81612e-12	4.61797	up
gene19197	65	36	115	178	399	464	0.804094	0.489609	1.46476	3.54959	6.42444	8.33051	0.00112553	2.69691	up
gene19199	695	360	549	1020	1021	1153	13.508	5.57627	9.0841	18.1138	14.9833	19.0478	0.000393581	1.42223	up
gene19200	146	10	8	307	310	535	2.54805	0.159629	0.090636	5.19315	4.57557	6.48799	1.3158e-07	3.28308	up
gene19204	984	848	895	1990	5212	5226	12.519	13.5797	12.0525	29.5005	75.1847	63.1854	0.00316541	2.59997	up
gene19210	366	328	382	982	1276	1531	7.61574	7.40455	7.87915	23.0463	28.9366	31.5296	2.42682e-09	2.22355	up
gene1925	353	376	317	725	1004	995	2.35535	2.83705	2.23228	5.60507	7.44471	6.80839	5.26981e-06	1.78444	up
gene1927	320	472	488	1532	1321	1124	3.73304	6.27551	5.5813	21.4167	17.3029	14.0679	4.11523e-08	2.03721	up
gene19312	468	369	452	589	909	1300	2.65999	2.41385	2.70197	3.98115	5.88035	7.78029	0.00752471	1.52403	up
gene19319	222	250	153	414	389	396	2.3715	3.01841	1.727	5.11888	4.61128	4.33582	0.00951492	1.33772	up
gene19337	404	410	399	28	60	94	3.00611	2.96873	3.31993	0.200986	0.424282	0.613074	2.35433e-05	-2.345	down
gene19360	1597	1340	1520	2475	3473	2446	28.6503	27.1958	28.758	51.3799	69.1187	44.9382	0.000930216	1.33699	up
gene19363	535	263	318	2676	3333	4426	4.51511	1.87407	1.84276	21.023	25.9755	30.1563	2.18927e-19	3.64895	up
gene19365	264	166	258	474	495	556	1.69141	1.20127	1.74202	3.52151	3.52446	3.65358	0.000775879	1.57128	up
gene19383	1252	1035	918	296	246	453	21.943	20.5364	16.9798	5.9927	4.77262	8.12377	0.0025934	-1.29076	down
gene19403	2171	1905	2056	2739	3777	4354	18.62	18.4825	18.5975	27.1914	35.9353	38.2531	0.00299527	1.23415	up
gene19423	90	75	85	937	2151	989	0.520282	0.490112	0.522141	5.65496	12.5206	5.29175	0.000442638	4.46306	up
gene19467	693	953	868	35	4	15	6.16408	9.58929	8.14712	0.353828	0.036014	0.129323	3.82812e-25	-5.15658	down
gene19475	1695	2069	1365	654	421	621	13.0139	18.7671	11.7941	6.62025	3.61606	4.91836	0.00761296	-1.20881	down
gene19489	929	742	632	1168	1562	1977	3.83515	3.56704	2.72169	5.57132	7.05797	8.29738	0.00017394	1.43766	up
gene19494	1216	676	648	2706	4535	3755	13.6263	8.55799	7.65545	35.0802	56.3601	43.0829	2.91966e-07	2.54604	up
gene19538	63	75	231	0	3	0	0.540103	0.731788	2.11327	0	0.019476	0	0.00244208	-6.45082	down
gene19541	9	7	11	4249	4277	9261	0.058816	0.051935	0.100948	59.7255	52.8739	130.62	2.98093e-17	9.76188	up
gene19556	731	686	525	2098	2508	2809	4.17205	4.58212	3.25393	16.4241	18.6611	18.0359	1.52443e-10	2.3365	up
gene19563	755	555	769	1445	1828	1511	3.37995	2.8093	3.63408	7.49272	9.08432	6.93077	1.95678e-05	1.62777	up
gene19582	51	50	51	196	109	198	0.875062	0.981913	0.920266	3.93262	2.09058	3.52	0.00148322	2.12234	up
gene19612	392	339	266	645	501	939	3.54808	3.48122	2.54098	6.78628	5.06194	8.7379	0.000507151	1.45842	up
gene1964	57	29	42	26881	38724	46651	0.460423	0.264215	0.355538	254.607	351.551	391.058	1.16696e-54	10.2024	up
gene19647	7	3	3	496	229	384	0.042742	0.016119	0.011319	5.80813	2.86099	3.89413	1.55515e-15	6.84156	up
gene1965	1196	1033	918	2298	3852	4541	7.57692	7.48402	6.00385	16.0876	25.2995	28.0661	2.46917e-05	2.16994	up
gene19651	971	676	896	1126	1983	1709	5.34182	4.21098	5.42506	7.95659	11.6316	9.8193	0.00439316	1.34733	up
gene197	102	122	106	332	158	366	1.25439	1.52965	1.3763	4.69952	2.16541	4.39767	0.00352797	1.75774	up
gene1972	30	37	32	245	145	145	0.262245	0.485433	0.290854	2.88848	1.56036	1.30607	1.34966e-05	2.83465	up
gene1973	59	83	70	308	188	151	0.275727	0.443861	0.34689	1.68797	0.986571	0.731262	0.00461949	2.01048	up
gene19745	342	143	271	10	9	9	2.79794	1.31954	2.34204	0.127743	0.073684	0.068038	1.71215e-09	-4.31588	down
gene19781	2029	1686	1272	329	524	577	20.5151	19.2177	13.9014	3.93289	5.87701	6.18252	0.000379516	-1.39451	down
gene19870	546	304	359	5	3	171	2.64432	1.66303	1.83421	0.022754	0.010904	0.844881	0.00131816	-2.40277	down
gene19872	606	540	578	73	69	266	3.8825	4.36866	4.10242	0.524508	0.486292	1.6225	0.000684567	-1.70499	down
gene19873	875	786	788	1304	1876	2520	7.46362	7.65431	7.15305	12.8557	17.7425	22.006	0.000299671	1.62074	up
gene19911	54	76	22	231	607	467	0.326758	0.522788	0.136467	1.64061	4.14279	2.94055	0.000301154	3.49054	up
gene19920	3450	2135	2824	5576	6387	6815	51.9531	36.3676	44.8569	97.1564	106.66	105.095	0.000166043	1.58255	up
gene19926	1037	1898	1641	271	465	155	9.01855	18.7315	15.2873	2.7586	4.4977	1.38926	0.00401813	-1.94609	down
gene19936	57	69	57	814	1311	1437	0.357689	0.440651	0.447036	5.77032	9.08402	8.94912	1.22443e-17	4.6788	up
gene1994	66	65	97	601	1116	1081	1.93535	2.16524	3.04145	20.6745	36.7182	32.9271	1.5393e-10	4.03085	up
gene19941	155	100	93	6	0	25	1.12358	0.822711	0.714162	0.050191	0	0.179651	0.000120313	-3.13026	down
gene19945	283	362	354	2704	3086	4500	2.29803	3.16297	3.15057	24.5769	26.534	37.9806	2.41679e-18	3.75405	up
gene19956	976	1066	692	1491	2024	2067	3.92438	4.84503	2.93752	7.32682	9.02763	8.51312	0.000179078	1.42859	up
gene19959	486	533	458	665	900	1078	3.20932	4.06805	2.85157	4.55969	6.69982	6.60766	0.00277151	1.23694	up
gene20017	169	198	123	49	3	11	0.78407	1.06801	0.599877	0.262223	0.010477	0.048369	0.000490642	-2.56849	down
gene20076	181	99	213	18	6	9	2.98764	1.8471	3.71138	0.343154	0.093226	0.137732	2.91476e-06	-3.4742	down
gene20080	569	368	510	2713	2127	2296	2.06017	1.50839	1.94716	11.3804	8.55136	8.52422	1.08576e-13	2.72513	up
gene20111	440	332	326	120	47	112	4.06596	3.65183	3.20001	1.34063	0.416416	1.04182	0.0082746	-1.57659	down
gene20115	1546	1687	1230	439	420	504	4.94638	7.0592	4.67183	1.77293	1.6749	1.77642	0.00115083	-1.31467	down
gene20147	873	996	1573	1565	1690	2357	9.28004	11.9748	17.6298	19.2472	19.9252	25.6625	0.00655223	1.10669	up
gene20151	278	187	167	420	625	659	1.06474	0.80092	0.608049	1.88415	2.7276	2.64396	3.00274e-05	1.84887	up
gene20154	1311	869	890	1865	2629	2558	9.49501	7.08793	6.75095	15.5301	20.7777	18.7888	2.15783e-05	1.62158	up
gene20190	1303	1311	1133	2037	2209	2285	6.74885	7.75352	6.18621	12.2086	12.6878	12.232	0.00265053	1.20655	up
gene20216	1033	867	1032	1745	2484	3366	15.7942	15.4713	15.7985	31.4608	41.7263	53.7033	9.25562e-05	1.77883	up
gene2025	23	28	28	814	951	1300	0.719672	0.994919	0.943008	30.4504	34.0777	43.0393	6.69286e-38	5.67088	up
gene2026	379	442	301	3948	5695	3635	3.21585	4.07226	2.64773	41.6147	66.4103	41.8736	1.7148e-11	3.97449	up
gene20284	1621	1204	1573	1876	2140	3135	4.53247	3.86545	4.49282	6.09607	6.70918	9.19772	0.00731786	1.11004	up
gene20293	62	93	112	1663	6957	6472	0.421919	0.854433	0.964884	16.561	66.0885	56.4598	1.91185e-05	6.22137	up
gene20336	336	285	327	19	23	28	3.46327	3.33266	3.56035	0.226386	0.257574	0.289125	4.47293e-08	-3.35077	down
gene20353	585	591	574	8937	25066	27200	3.09577	3.34762	2.89509	44.0658	119.764	120.519	6.27791e-07	5.53135	up
gene20354	33	17	16	453	495	650	0.766601	0.447836	0.382369	12.5479	13.1317	15.9324	6.77781e-23	5.01986	up
gene2051	341	394	303	5173	6034	7822	2.76713	3.6157	2.57734	46.8531	52.7543	62.4813	1.05846e-29	4.58878	up
gene20538	1382	1767	1441	481	325	430	4.88428	7.25497	5.49568	2.01452	1.27312	1.587	0.000139765	-1.50113	down
gene20574	1057	878	1018	1405	1925	1739	7.62815	7.16873	7.74919	11.7289	15.4065	12.8498	0.00313046	1.19718	up
gene20575	79	172	57	6	4	0	1.75234	4.32045	1.3356	0.153102	0.098386	0	0.0092626	-4.54591	down
gene20577	0	0	0	12760	58790	26984	0	0	0	256.113	1131.03	479.36	2.14392e-10	Inf	up
gene20638	19	8	29	194	574	269	0.779688	0.292878	0.998655	8.04069	21.0996	9.49242	0.00240839	4.672	up
gene20664	101	198	261	2619	4735	4052	0.632677	1.40521	1.72957	19.1041	33.1022	26.1542	7.18801e-14	4.74811	up
gene20669	96	70	69	210	280	343	3.30866	3.12012	2.67497	8.74906	11.3951	13.6008	7.91446e-05	2.23734	up
gene20736	9	13	8	48	47	82	0.547899	0.371388	0.129012	2.07406	2.41437	2.33551	0.000405358	2.93487	up
gene20743	504	379	456	1869	1677	3979	6.49376	5.72626	6.59402	27.4526	24.5362	52.3519	0.00127486	2.8853	up
gene20748	296	269	281	542	611	426	5.24173	6.01262	5.61702	12.4807	13.4925	7.71477	0.00553624	1.32063	up
gene20759	137	119	94	1256	2377	1787	1.14185	1.22021	0.837984	11.5125	27.3965	16.8833	7.58832e-10	4.37035	up
gene20773	250	194	191	630	991	1229	2.6221	2.2978	2.10889	7.65211	11.5365	13.2143	4.87381e-07	2.57487	up
gene20818	206	242	166	34	18	14	0.629681	0.991277	0.533847	0.118217	0.060707	0.043197	4.29559e-05	-2.81364	down
gene20834	32	8	19	73	53	104	0.498373	0.126045	0.300159	1.32353	0.923058	1.65957	0.00368707	2.39893	up
gene20849	69	63	35	308	355	458	0.790197	0.81818	0.422717	4.09259	4.52741	5.39675	1.28644e-09	3.14456	up
gene20855	503	629	703	866	1216	1228	1.67535	2.358	2.49319	3.36266	4.55988	4.22391	0.00183047	1.25335	up
gene2086	1687	1252	1239	5735	7142	8566	14.4524	12.135	11.1957	56.8689	67.8865	75.1808	2.9633e-12	2.77157	up
gene20865	830	1211	991	2768	5156	3102	9.4958	15.6625	11.9445	36.6677	65.4865	36.3862	0.0020899	2.26971	up
gene20871	967	821	762	281	208	305	13.6901	12.7917	11.07	4.46371	3.16566	4.29273	0.00451633	-1.27996	down
gene20895	411	299	392	552	674	785	6.20038	4.24395	4.98925	8.94626	10.2982	10.1562	0.00370186	1.28366	up
gene20903	3	62	77	265	204	253	0.031357	0.92103	0.983165	4.32928	3.34316	3.79614	3.52283e-06	2.7152	up
gene20906	191	160	266	873	784	979	0.818844	0.772187	1.18072	4.52851	3.87613	4.4837	1.89322e-10	2.50837	up
gene20913	263	304	152	597	383	548	3.47238	4.46362	2.19067	9.22622	5.59726	7.55136	0.00131695	1.47486	up
gene20923	0	0	21	103	743	473	0	0	0.362824	1.95704	13.6405	8.05457	0.002202	6.43156	up
gene20933	384	342	626	19	6	7	3.87206	3.90003	6.6657	0.212683	0.056772	0.062627	4.07565e-13	-4.98255	down
gene20939	5793	5768	5493	15037	14173	18017	98.4819	110.943	98.493	295.796	267.227	313.672	5.84037e-05	1.87074	up
gene20983	876	656	893	1327	1811	1910	5.73395	4.8596	6.16814	10.0607	13.1544	12.8117	0.000125128	1.47568	up
gene2103	307	255	237	1220	788	809	2.42827	2.30008	2.1001	10.6288	6.44313	8.14435	4.01683e-07	2.23128	up
gene2105	307	212	190	1055	504	846	3.44821	2.84271	2.43286	13.5554	7.09082	10.5002	0.000170297	2.17148	up
gene21057	212	180	217	776	615	1016	0.936563	0.898661	1.01331	3.97841	3.02279	4.61294	2.35032e-09	2.38508	up
gene21062	1000	809	1063	2230	1679	1392	8.94511	8.24568	10.1578	22.7566	16.7254	12.8856	0.000997102	1.30638	up
gene21066	45	80	63	0	18	8	0.366765	0.732365	0.550946	0	0.154847	0.064706	0.00625743	-2.44037	down
gene21099	13	0	4	3637	9353	10647	0.299893	0	0.098626	102.272	252.13	265.019	4.9535e-17	10.9251	up
gene21105	519	410	482	1072	951	1508	2.11467	1.7777	2.09831	4.82602	4.30647	5.99886	5.26981e-06	1.72817	up
gene21113	2199	1615	1788	3169	2916	3099	18.5242	15.3885	15.8886	30.8883	27.2414	26.7354	0.00781976	1.13054	up
gene21126	3	0	11	1863	3007	2376	0.00809	0	0.059172	12.7583	19.7685	14.1399	1.16142e-38	9.47909	up
gene21127	17	5	11	144	135	236	0.172399	0.049337	0.113689	1.86844	1.6189	2.78095	4.12989e-10	4.39749	up
gene21129	725	1036	1112	6089	7660	7248	3.31135	5.39746	5.65993	30.9684	36.6752	31.2749	1.53875e-16	3.26969	up
gene21141	55	45	61	109	165	172	0.596267	0.559583	0.72265	1.38542	2.10603	2.06061	0.0082118	1.88549	up
gene21143	440	398	351	68	45	82	2.07474	2.12175	1.74363	0.367748	0.232121	0.395537	7.48923e-05	-2.2127	down
gene21187	2006	1326	1793	3472	5078	5268	27.0196	20.1952	25.4678	54.1073	75.8533	72.6685	2.38969e-06	1.85289	up
gene21191	1025	892	657	1203	1608	1580	3.30645	3.25108	2.23618	4.48453	5.75875	5.22329	0.00351051	1.17993	up
gene21215	749	634	590	1608	1912	2148	2.96613	2.84191	2.47935	7.3763	8.40729	8.72674	1.57522e-07	1.93144	up
gene21273	968	1136	1353	4697	8280	7896	18.8051	27.094	29.893	107.327	183.227	160.085	1.59833e-08	3.00038	up
gene21284	0	1	0	127	142	43	0	0.010474	0	3.57659	3.74746	1.04155	3.1805e-07	8.59414	up
gene21295	2007	1456	1789	3182	4742	5602	9.17943	8.41227	9.39308	17.7489	24.5422	26.8237	6.41124e-06	1.77924	up
gene21316	1203	955	999	2572	2740	3108	10.6563	9.69992	8.22861	33.9921	34.1078	35.4332	1.14822e-06	1.8275	up
gene2136	4	15	8	43	64	43	0.127919	0.108103	0.091655	0.908333	1.57254	0.826011	0.000810583	2.84572	up
gene21379	0	0	0	81	124	494	0	0	0	1.37153	1.9568	7.26312	0.000871039	Inf	up
gene21409	693	470	594	229	131	134	5.00989	3.56719	4.05586	1.72873	0.815495	1.18278	0.00451022	-1.4076	down
gene21412	81	108	78	300	396	430	1.48349	2.20972	1.5329	6.64882	8.313	8.39498	1.02091e-06	2.46806	up
gene21419	396	337	524	656	892	759	2.72611	2.6778	4.02785	5.32019	7.05192	5.58019	0.00251107	1.29781	up
gene21428	1697	1736	1798	2651	3387	3764	13.7046	14.6296	14.9698	23.7997	29.6389	25.5669	0.00114377	1.31031	up
gene21437	4204	4614	3345	19400	17856	16105	101.313	140.644	87.4505	596.705	479.878	397.693	2.9145e-08	2.53705	up
gene21455	261	215	272	1946	2607	4091	1.17533	2.52374	2.75592	10.0185	12.1786	16.898	3.98922e-09	3.93318	up
gene21490	2	8	1	44	71	66	0.00951	0.042634	0.001535	0.243076	0.372482	0.319196	4.54518e-07	4.37785	up
gene21625	141	199	172	251	406	376	1.33543	2.20804	1.82526	2.8443	4.26979	3.65252	0.00935323	1.40974	up
gene21630	46	16	15	485	154	560	0.348016	0.131385	0.109583	4.53017	1.31859	4.64137	0.000136518	4.37947	up
gene21635	833	480	798	1189	1045	1702	6.18963	4.10134	5.02716	9.12054	7.32603	12.0297	0.000883571	1.31499	up
gene21657	643	840	504	5801	4588	4607	2.5784	3.7197	2.08496	27.2673	20.4336	19.0517	5.10001e-18	3.30894	up
gene21689	3276	2150	2901	26622	38924	31906	48.7305	36.1884	45.5121	458.385	642.382	486.212	6.75764e-15	3.97763	up
gene21709	6	20	12	105	105	98	0.018447	0.067799	0.038405	0.377899	0.360261	0.322802	7.33392e-06	3.38748	up
gene21710	2016	2054	1945	7887	10344	11542	7.13469	8.24438	7.25293	32.4927	40.858	42.1268	6.41383e-11	2.71051	up
gene21716	33	74	38	1437	1667	2656	0.182324	0.468751	0.222495	9.36115	10.4086	15.3161	9.75624e-20	5.67143	up
gene21744	70	54	54	130	144	237	0.45132	0.389116	0.361565	1.35483	1.42147	2.12383	0.00439132	1.92329	up
gene21755	285	368	367	1753	1811	2697	2.23648	3.26416	3.03836	15.9149	15.7574	21.6719	1.35611e-16	3.00713	up
gene21757	1643	1793	1276	7063	3404	7584	19.1156	24.7853	14.7381	103.067	50.2011	83.3781	0.000120981	2.32156	up
gene2178	1529	1862	1670	663	328	723	8.91862	13.1312	10.6195	4.71959	2.3227	4.48126	0.00493659	-1.1786	down
gene2182	257	228	310	7	13	8	1.41983	1.40578	1.81449	0.05499	0.06648	0.058699	8.9219e-11	-4.39953	down
gene21829	42	71	70	15	5	0	0.148016	0.284713	0.261896	0.058703	0.016022	0	0.00174238	-2.7785	down
gene21838	356	433	370	101	33	128	2.54045	2.99593	3.13588	1.62869	0.173881	1.9165	0.00228766	-1.77259	down
gene21878	266	259	259	390	552	562	3.55214	3.95744	3.68011	6.02265	8.19131	7.71692	0.00470525	1.34759	up
gene21925	1574	1226	1451	2122	2976	4539	20.1243	10.4567	11.9862	21.7083	29.272	38.7097	0.00451633	1.58508	up
gene21941	4696	1737	3361	6534	5573	5009	96.7837	48.0641	64.2964	124.032	116.272	66.287	0.00598001	1.2506	up
gene2199	129	131	96	867	1614	922	1.35978	1.58202	0.97737	10.7769	19.2308	9.98725	1.46216e-05	3.67536	up
gene22099	5038	4214	3394	14938	24601	26097	31.4113	31.653	22.919	112.28	174.603	172.447	6.67357e-09	2.78485	up
gene22104	965	1022	977	1417	2455	2274	5.51433	7.18857	6.59121	9.52785	15.4332	13.2182	0.00104119	1.45916	up
gene22105	2411	1889	1968	2574	3850	4256	28.1611	24.9584	24.2351	34.7863	49.8774	50.9194	0.00519219	1.18137	up
gene22116	73	92	62	0	0	0	0.43079	0.615144	0.389539	0	0	0	6.74378e-11	#NAME?	down
gene2212	73	92	55	275	487	287	0.321011	0.448213	0.23704	1.63907	2.6272	1.63883	0.000301048	2.6611	up
gene2213	25	29	27	1225	2448	1923	0.365574	0.562162	0.430111	16.4075	36.6652	35.3847	3.73578e-15	6.51902	up
gene22142	4	13	26	97	76	115	0.086098	0.327359	0.622394	2.67493	1.93583	2.77568	4.41501e-05	3.13326	up
gene22143	7	6	15	72	81	139	0.123423	0.119933	0.317362	1.70625	2.10684	3.22429	1.27578e-06	3.78988	up
gene22147	30	11	17	150	145	228	0.602356	0.202924	0.296831	3.93912	3.47244	5.2154	9.70775e-08	3.60268	up
gene22156	7	1	3	79	93	64	0.146463	0.014618	0.055993	2.07627	2.47818	1.59614	2.15688e-08	4.8986	up
gene22159	11	10	14	205	159	290	0.067417	0.076388	0.089783	1.54525	1.26609	2.07042	2.69815e-12	4.62334	up
gene22182	0	3	0	1207	1491	3644	0	0.029291	0	12.6276	15.7245	35.1769	6.74378e-11	11.3031	up
gene22184	2444	1605	1879	3752	3055	6465	12.6085	9.36782	10.2247	22.3982	17.4771	34.1579	0.00818073	1.56563	up
gene22192	714	644	540	1648	2098	1861	3.56462	3.38639	2.7043	9.01237	11.1047	9.40127	8.53691e-08	1.97499	up
gene22195	76	69	78	0	4	0	0.444776	0.455603	0.482187	0	0.025861	0	5.63936e-08	-5.31745	down
gene22196	422	427	481	54	74	120	2.0948	2.51652	2.81834	0.22792	0.407488	0.640053	0.00016147	-2.02889	down
gene22201	223	208	194	281	478	564	3.72413	3.92678	3.41036	5.43544	8.87642	9.66734	0.00285631	1.48537	up
gene22215	317	277	436	3423	10836	4800	1.56067	1.54096	2.25957	19.7783	59.265	24.2278	0.00477305	4.64955	up
gene22218	5638	4384	5258	9574	13332	12367	138.443	123.662	138.784	275.274	371.113	317.272	0.0004428	1.62618	up
gene22219	882	919	1380	3522	5715	6780	24.9693	34.0389	43.4184	133.438	198.315	209.711	1.38886e-07	2.73837	up
gene22226	695	453	712	183	116	198	6.87843	5.07199	7.43283	2.09288	1.26775	2.0015	0.00212122	-1.49101	down
gene22256	337	234	252	392	700	786	1.65017	1.02523	1.04475	1.9308	3.61304	4.02453	0.00232131	1.60615	up
gene22262	222	105	128	2525	2945	3895	3.01155	1.6174	1.83521	39.7971	44.4904	54.3403	2.21828e-34	4.78893	up
gene22269	119	124	112	656	503	489	1.29319	1.53683	1.27008	8.32958	6.16175	5.69301	4.63102e-09	2.62142	up
gene22273	735	679	502	2617	3903	5562	2.56314	2.73536	1.925	10.8544	15.3235	19.3922	5.6875e-07	3.05262	up
gene22274	501	318	260	41	132	83	3.32762	2.87176	2.84579	1.01297	1.12648	1.5751	0.00533101	-1.64076	down
gene22278	164	144	129	1187	1981	1632	0.744773	0.765695	0.334354	7.46659	13.744	5.68611	7.22635e-13	3.87307	up
gene22288	1622	1481	1226	583	447	405	7.66052	8.06939	7.24993	3.17054	2.37643	1.99355	0.00410796	-1.18138	down
gene22302	26	35	17	143	167	342	0.220825	0.331042	0.150826	1.41735	1.58736	2.99816	0.000174507	3.43096	up
gene22306	854	805	928	4694	5907	3527	7.3269	7.69987	8.3169	46.3027	56.1079	30.8158	1.38886e-07	2.87334	up
gene22315	4296	3913	3454	7142	6396	9282	23.289	23.86	19.9257	44.7454	38.5708	51.7064	0.00194125	1.36817	up
gene22320	89	122	83	441	1156	636	0.896766	1.39	0.880043	5.14283	12.9228	6.55771	0.00453335	3.33433	up
gene22324	508	358	585	63	43	100	2.90837	2.3198	3.53532	0.417196	0.268953	0.584126	3.49816e-06	-2.41425	down
gene22358	245	303	220	1776	2473	2370	1.53092	2.50765	1.64222	13.8526	25.2292	16.9583	2.41915e-21	3.50517	up
gene22378	157	409	514	806	1017	1140	1.13289	3.88589	4.68168	6.74844	8.86382	7.73675	1.3916e-06	1.84255	up
gene2238	234	111	188	1644	3950	3078	2.35825	1.33219	1.87375	20.9431	46.5111	31.5416	1.41738e-06	4.46542	up
gene22381	797	603	602	1915	2137	2685	7.30008	6.21925	5.79284	20.375	21.7391	25.1487	3.67297e-09	2.16104	up
gene22387	511	236	588	1398	806	1000	4.78531	2.51618	5.71774	14.6219	8.11538	9.1613	0.00052627	1.69625	up
gene22393	251	226	179	3371	4013	5415	1.34634	1.37024	1.01367	20.9582	23.9117	29.7952	1.12411e-30	4.68619	up
gene22407	325	440	291	74	50	80	0.815566	1.22791	0.89017	0.226327	0.135812	0.249973	0.000692195	-1.99006	down
gene22408	99	149	71	9	7	6	0.943385	1.61229	0.708801	0.089938	0.064651	0.049748	0.000315252	-3.46924	down
gene22415	371	510	443	50	40	73	1.94084	3.02271	2.44379	0.298306	0.231096	0.390192	9.6829e-07	-2.64106	down
gene22416	241	277	180	837	1561	1400	2.05405	2.67365	1.61786	8.27186	14.7924	12.2487	8.40405e-07	2.84438	up
gene22422	298	444	247	1151	515	947	1.97211	3.26463	1.4909	8.76334	3.73802	5.37861	0.0048837	1.77717	up
gene2246	354	175	254	589	761	626	1.40316	0.782051	1.03872	2.72079	3.36905	2.55287	3.7248e-05	1.77336	up
gene22480	616	693	738	172	115	155	2.76957	3.52391	3.48557	0.892283	0.569558	0.713495	8.18588e-05	-1.81247	down
gene22487	128	130	167	940	1233	1633	1.217	1.43034	1.71785	10.5809	13.5776	16.4945	9.84639e-16	3.56484	up
gene22503	3706	2772	3190	1048	1165	1177	15.4986	12.7782	14.201	5.24846	5.4399	5.25991	0.00847063	-1.09387	down
gene22504	102	137	89	5	25	8	1.27482	1.93428	1.1756	0.058331	0.349091	0.089783	0.000774848	-2.68497	down
gene22531	1609	1756	1500	2349	5212	5507	4.30977	6.95561	4.71217	8.27732	17.4386	16.8463	0.00947586	1.82586	up
gene22544	1246	936	892	5955	6299	6041	4.66369	5.7136	4.94207	32.7888	31.3188	30.467	2.03302e-14	2.99104	up
gene2256	2399	967	1780	22446	41970	59049	17.5392	6.0875	13.9162	169.23	286.474	387.776	2.9449e-08	5.01261	up
gene2258	725	885	479	8225	13698	14726	8.55607	10.9924	5.60414	90.3196	161.922	159.331	8.42939e-16	4.52373	up
gene22584	1127	679	769	285	256	202	14.5563	9.91168	10.4751	4.24632	3.66038	2.66255	0.00168174	-1.36185	down
gene22588	2174	2386	1847	175	266	245	8.02654	10.0231	7.17291	0.704407	1.08934	0.894424	2.04086e-14	-2.81984	down
gene22591	2091	1382	1346	457	417	576	9.3899	6.46514	6.26897	2.51904	3.28495	2.57385	0.000885113	-1.3198	down
gene22605	531	529	463	7519	10973	13140	6.83559	7.7129	6.29287	112.132	156.848	173.424	9.82082e-22	4.77696	up
gene2261	190	257	256	34	34	54	3.87886	6.39625	5.6206	0.733581	0.413078	1.01898	0.00143102	-2.14035	down
gene22616	174	168	183	459	688	819	1.47894	1.61885	1.64168	4.52097	6.50364	7.14699	6.24653e-08	2.30912	up
gene22617	47	46	36	732	1819	2005	1.93114	2.14833	1.55111	35.1594	83.7123	85.2039	4.21555e-08	5.5437	up
gene22618	17	21	63	11970	19980	18342	0.40178	0.550017	1.84868	372.549	542.133	474.54	3.1791e-43	9.38122	up
gene22639	6806	3412	5808	31105	43301	51851	60.628	29.0953	53.2835	288.066	377.1	420.088	2.22827e-10	3.40529	up
gene22663	213	208	169	17	12	17	2.03637	2.24821	1.70347	0.179069	0.117069	0.161524	3.22593e-06	-3.28262	down
gene22666	1138	1155	1055	1883	3341	3470	10.255	11.7822	10.0261	19.6478	33.4039	32.0439	0.00028552	1.78108	up
gene22696	1442	993	1382	431	288	302	7.2576	5.65538	7.33765	2.50515	1.60399	1.55204	0.000187075	-1.48013	down
gene22699	398	392	519	1586	1168	2044	5.93761	6.61654	8.18575	27.4456	19.3689	31.3045	4.57314e-10	2.27207	up
gene227	1072	893	1081	1772	1731	1895	14.3097	13.4798	15.2204	27.3584	25.6262	25.906	0.00191247	1.23886	up
gene22724	145	73	122	198	361	324	0.654284	0.371059	0.581972	1.03365	1.80975	1.50523	0.00149363	1.8122	up
gene22786	3	11	5	60	45	73	0.029024	0.169454	0.061228	0.98516	0.702373	1.0637	1.87996e-05	3.57429	up
gene22831	397	406	365	1394	3523	3714	5.13389	6.1801	4.90133	21.8479	53.8849	53.1956	0.000240157	3.28842	up
gene22832	14	30	24	94	138	88	0.155823	0.401037	0.297586	1.2977	1.82762	1.07169	0.00044153	2.62915	up
gene22873	0	334	437	832	570	561	0	4.91231	6.0068	12.5469	8.22963	7.48842	0.00394538	1.7227	up
gene2289	582	501	613	1770	2970	2437	8.00726	8.38221	9.03745	29.06	46.8717	34.7751	2.56976e-07	2.50099	up
gene22903	88	41	130	288	704	576	1.39809	1.10433	2.37693	7.30081	19.0359	13.2154	0.000477252	3.04054	up
gene23052	2693	1591	2008	10452	12221	11931	26.6898	18.176	21.6369	120.5	136.067	123.082	1.52774e-11	2.88642	up
gene23072	73	56	38	115	150	189	3.48763	3.02575	1.77921	6.4594	8.10554	9.44472	0.0089245	1.84911	up
gene23092	480	358	599	2340	3004	5721	3.71206	3.21545	4.31515	19.8741	24.1579	40.0745	0.000131968	3.34728	up
gene23198	1590	2124	1861	8857	13977	13953	22.2682	33.6553	27.4917	143.55	217.14	200.157	1.10032e-12	3.11891	up
gene233	131	171	129	1090	1047	1900	1.02491	1.50741	1.05905	9.87114	9.09028	15.2273	4.16258e-10	3.60685	up
gene23315	1525	1089	1357	5161	10473	7606	18.7769	15.1225	17.8567	76.6217	143.464	94.6211	4.00417e-05	2.97809	up
gene2333	194	102	82	640	745	424	2.92558	1.95367	1.42534	11.9858	13.1843	7.63227	4.56189e-06	2.70086	up
gene2334	472	562	482	2459	3464	5321	5.58534	7.39078	5.9773	33.9888	45.4407	64.1059	5.19871e-07	3.27795	up
gene2337	2152	1766	2080	18352	19592	24919	25.5577	23.2329	25.6484	262.626	262.517	323.242	5.00213e-16	3.79878	up
gene23370	16	18	40	80	158	192	0.098307	0.123984	0.270751	0.589988	1.11995	1.26039	8.3058e-05	2.94804	up
gene23371	363	304	355	677	992	1243	7.90651	6.36623	8.91528	15.8046	19.8716	26.9986	5.58832e-06	1.91844	up
gene23378	9	3	11	38	53	53	0.114597	0.037671	0.14692	1.02303	0.779464	1.23573	0.000404823	3.09113	up
gene23404	69	94	18	200	305	206	1.37412	2.11877	0.373665	4.63422	6.78466	4.2229	6.31997e-05	2.36398	up
gene23410	4212	3300	4521	1353	1386	1075	24.6031	20.9469	27.3593	9.704	9.73802	6.85807	0.00228766	-1.23256	down
gene23423	479	188	311	556	544	732	5.10863	2.46593	3.48485	6.90677	6.50322	8.07923	0.00339999	1.33791	up
gene23448	189	271	378	562	659	1244	1.04485	1.79252	2.32212	3.65147	4.19704	7.34417	0.00713761	1.94135	up
gene23454	1036	777	722	206	170	356	7.28715	6.5242	5.17544	2.16776	1.10039	3.21844	0.00178851	-1.39518	down
gene23478	82	151	173	960	1166	1371	1.24316	2.60151	2.77656	8.99492	18.9178	11.0436	9.7665e-20	3.49603	up
gene23487	517	226	372	597	730	934	11.8732	7.35401	10.6893	11.2221	17.9743	19.5923	0.000616796	1.44969	up
gene23488	68	75	74	182	370	351	0.926244	3.60967	4.92371	3.03425	4.96018	4.55419	0.000108049	2.46241	up
gene23542	132	94	95	7	5	17	2.26248	1.76049	1.73073	0.137804	0.076763	0.278083	0.000165705	-3.08174	down
gene23543	132	132	116	24	3	0	1.45697	1.89901	1.41168	0.351162	0.030935	0	1.56418e-05	-3.39578	down
gene23547	120	86	95	16	9	17	1.32157	1.07432	1.10821	0.193245	0.106171	0.189395	0.00340593	-2.43583	down
gene23556	777	362	476	1601	2609	2352	5.17268	3.02306	2.93996	11.6124	17.9919	13.6747	6.30101e-08	2.45936	up
gene23557	42	68	40	154	209	179	1.13187	1.99866	1.18069	4.80637	6.19359	4.95032	0.000516662	2.24242	up
gene2356	131	90	81	1984	1073	2219	0.676851	0.561471	0.443808	12.8339	6.69929	12.7844	3.73287e-13	4.53012	up
gene23580	12	25	29	182	468	577	0.196247	0.265712	0.303597	2.23972	5.48848	6.10797	1.62551e-05	4.60046	up
gene23605	84	53	80	391	330	241	0.620375	0.442421	0.624722	3.35226	2.70571	1.82336	1.98969e-06	2.58174	up
gene23606	0	0	0	386	472	708	0	0	0	6.92087	8.11434	11.2365	9.38556e-35	Inf	up
gene23634	1087	1363	1111	13423	19846	21060	15.0651	21.4565	16.2286	217.936	307.005	301.392	9.24337e-21	4.32725	up
gene23647	886	585	454	1036	1738	2307	6.24723	5.92173	4.06283	9.86862	14.1249	16.8698	0.00295355	1.81068	up
gene23657	83	158	244	12	16	24	1.48021	3.21106	4.62418	0.248306	0.310944	0.427244	0.00655348	-2.83362	down
gene23676	1695	1247	1349	1908	2666	2271	11.5319	9.59469	9.68162	15.0235	20.1186	15.8268	0.00958199	1.09618	up
gene2369	599	541	464	160	125	178	2.54863	2.39651	2.12213	0.760875	0.596813	0.727184	0.00769001	-1.39162	down
gene23706	1179	971	1068	1598	1727	2226	12.0296	11.2046	11.4937	18.8666	19.5484	23.2728	0.00288669	1.19448	up
gene23714	412	525	369	840	1056	1034	1.93731	2.77707	1.85801	4.43854	5.49091	5.31078	6.47557e-05	1.5616	up
gene23736	327	312	464	3489	10376	19784	12.396	13.6741	18.0455	162.323	457.341	804.022	0.00209609	5.32225	up
gene23737	494	291	333	13309	12908	18184	19.8524	13.2501	14.1288	619.814	576.189	749.546	1.17477e-33	5.72855	up
gene23741	4550	4133	2817	5230	6941	8458	21.5206	22.6008	12.5336	20.4659	34.2144	38.5812	0.00551382	1.24395	up
gene2375	13737	10744	13574	30679	39719	43061	143.486	126.387	148.846	368.808	454.066	456.912	0.000354592	1.99129	up
gene23751	864	939	763	1844	2534	3129	4.2251	5.25169	3.94546	10.6036	13.8834	16.0517	1.21949e-07	1.94478	up
gene23752	1930	1764	1507	6491	12285	11014	10.3819	10.7709	8.57024	40.5363	73.1704	60.7131	7.63489e-07	2.92937	up
gene23776	22	11	14	290	102	224	0.572339	0.199054	0.254241	6.18103	2.06866	4.2121	2.60562e-05	4.13038	up
gene23827	352	266	245	649	1110	970	3.74728	3.21376	2.85547	8.18961	13.3565	10.72	9.78507e-06	2.08035	up
gene23856	317	280	274	2399	3952	5218	2.78946	3.7113	2.5618	24.7072	50.5785	47.2488	1.02674e-09	4.1338	up
gene23892	461	452	393	893	1482	1724	3.90034	4.39727	3.63323	9.19957	14.3889	15.5185	3.00274e-05	2.05168	up
gene23920	782	1024	805	1217	1923	1894	1.68013	2.86558	2.0007	3.97646	6.65019	5.49546	0.000521615	1.3432	up
gene23954	811	596	787	1519	2170	2059	10.1198	7.38993	9.10077	19.2825	26.5911	25.8382	1.24327e-06	1.81068	up
gene23972	31	34	54	150	108	107	0.233596	0.292075	0.842616	1.34139	0.962267	0.847066	0.00670555	2.02961	up
gene23974	444	464	402	1478	1651	1703	3.35566	3.9605	3.19981	12.9255	13.8377	13.1742	4.04668e-10	2.28685	up
gene23978	91	104	100	4	18	19	1.57886	2.04684	1.83062	0.066992	0.346371	0.324174	0.00334622	-2.44732	down
gene2398	1207	806	860	4747	3785	6797	6.20686	4.6855	4.66062	28.4308	21.5848	35.9375	5.44661e-11	2.82213	up
gene2400	728	721	740	1332	1575	2116	9.44537	15.8054	15.2973	20.0144	34.5578	42.2845	1.97044e-05	1.59817	up
gene24006	371	193	416	1704	3816	8069	11.6019	6.2956	12.7945	56.162	137.826	252.718	0.00963922	4.20133	up
gene2409	1922	3641	2985	10975	11713	13165	20.0497	38.4385	28.4576	128.356	132.554	140.228	9.27404e-09	2.45192	up
gene2415	476	778	629	67	85	129	3.07606	5.69581	4.29252	0.496037	0.604947	0.849642	3.45831e-05	-2.36664	down
gene24204	1153	1251	1156	1606	1815	2519	7.77308	9.69081	7.37181	12.7338	14.0782	16.594	0.00479924	1.13357	up
gene24211	659	452	536	1043	949	1007	3.65483	2.70539	3.12908	6.71006	5.72257	5.65768	0.00176505	1.28481	up
gene24217	89	45	27	4375	9588	4557	1.12346	0.638434	0.34883	66.8801	140.634	61.6961	3.6324e-08	7.29471	up
gene24233	122	145	220	20	16	26	1.0187	1.25039	1.88509	0.154535	0.186726	0.182461	0.000484703	-2.5766	down
gene24251	383	298	207	118	0	0	3.93861	3.45882	2.2285	1.4014	0	0	0.00150298	-2.49343	down
gene24253	169	122	156	568	674	297	0.704946	0.580084	0.692128	3.01417	3.25926	1.32857	0.00506028	2.22284	up
gene24256	3206	2820	3082	5726	6418	7201	73.5741	73.2231	74.5915	152.043	163.359	169.24	0.000407721	1.49635	up
gene24287	254	431	347	640	937	775	0.682982	1.54388	1.33628	2.40269	3.333	2.54764	9.30801e-05	1.58244	up
gene24292	375	153	295	1653	768	2433	5.09056	2.33887	4.21633	26.9087	11.554	33.9197	0.00186722	2.97368	up
gene24295	529	569	483	1402	1725	1747	2.61943	3.67516	4.16659	8.30735	8.49948	9.26006	3.42155e-08	2.02721	up
gene24300	1845	1823	1972	787	599	613	7.48952	8.3689	8.44057	3.69046	2.6913	2.54485	0.00879997	-1.08715	down
gene24330	112	185	482	474	612	542	0.903028	1.67803	5.09431	5.19221	5.90143	5.05112	0.00259157	1.4797	up
gene24331	17	36	40	249	193	169	0.668022	1.58232	1.70108	11.4848	8.55383	6.88674	7.25971e-07	3.11025	up
gene24333	350	249	180	1890	1795	3841	7.84161	6.29931	4.25499	49.038	44.655	88.2346	7.39543e-06	3.66754	up
gene24334	150	247	157	1972	3113	5653	4.134	7.69911	4.55966	42.1393	58.1669	94.54	1.01968e-05	4.64353	up
gene24345	3169	3632	3528	9659	14016	16241	16.2991	21.1776	19.2853	57.5084	79.7693	85.649	8.13972e-08	2.3488	up
gene24346	45	87	87	314	432	187	0.204185	0.45247	0.421794	1.667	2.2044	0.876184	0.00362809	2.50107	up
gene2435	3758	3156	4117	6053	6028	7215	29.6489	28.1739	34.2607	55.2589	52.75	58.2959	0.00693229	1.21817	up
gene24362	885	643	579	1689	2952	3521	12.7591	10.7154	8.62539	29.3107	48.8144	53.7856	3.677e-05	2.36493	up
gene24382	880	539	587	183	141	184	7.52851	5.22058	5.29816	1.8065	1.33363	1.60857	0.000793959	-1.56298	down
gene24390	382	431	284	5956	7020	7054	1.84545	2.37343	1.45721	33.3973	37.9638	35.035	2.61765e-29	4.58907	up
gene24402	1477	1305	1307	1807	2390	2300	18.784	18.9851	18.5522	29.0009	36.3768	32.8116	0.00986152	1.08051	up
gene24414	426	180	497	1669	947	1098	3.03732	0.951095	2.80792	10.5626	7.02083	6.40041	8.03507e-05	2.18886	up
gene24422	154	168	218	1545	2016	1935	0.978538	1.20273	1.4581	11.3388	14.2042	12.5667	1.46594e-23	3.75705	up
gene24436	506	470	346	91	66	65	6.26117	6.57746	4.51897	1.29869	0.897919	0.817589	4.92755e-05	-2.1661	down
gene24440	742	655	1080	1318	1164	2097	4.03289	4.15182	6.75293	8.79476	7.33678	12.483	0.00370992	1.28817	up
gene24465	5	0	5	59	76	63	0.044419	0	0.047166	0.823127	0.97159	0.708966	9.46936e-08	4.78608	up
gene24467	2485	2305	2443	48415	76384	84906	15.9853	16.6139	16.7469	379.18	582.574	579.829	1.42035e-17	5.26471	up
gene2447	1413	1127	1116	2671	2479	2850	10.6453	9.60442	8.86345	23.2837	20.7106	21.984	6.25132e-05	1.54133	up
gene24473	2477	1464	1568	3188	4061	3178	15.6477	10.4892	10.6362	24.9457	30.7603	22.7297	0.00104458	1.35236	up
gene24599	245	260	156	1985	3660	3068	2.09634	2.5099	1.40247	19.6496	34.7393	26.8887	7.72286e-11	4.12485	up
gene24628	384	353	336	4909	7576	6744	4.88254	5.08013	4.51047	72.2984	106.96	87.9131	2.10546e-22	4.57627	up
gene24640	799	604	810	1310	1586	1716	6.06153	5.18723	6.48505	11.5084	13.3567	13.3434	0.000125885	1.47644	up
gene24642	23	22	27	17639	41834	27927	0.560277	0.618548	0.721124	559.612	1195.94	761.745	1.12957e-17	10.6682	up
gene24666	5523	2903	4196	22905	36175	39055	54.4379	29.8385	39.2356	239.92	456.28	362.079	2.5983e-11	3.38689	up
gene24740	219	275	309	984	2091	1273	0.966429	1.36883	1.43274	5.35724	10.242	5.7949	0.00101323	2.85329	up
gene24743	1243	755	970	1826	1975	2845	9.21819	6.18139	5.33633	15.9616	16.8488	22.2066	3.28513e-05	1.57852	up
gene24765	499	398	498	793	894	1023	5.98802	5.55352	6.07758	10.2332	11.8836	13.0326	0.000774848	1.37143	up
gene24830	959	1005	1230	263	344	372	5.83741	6.91995	7.89443	1.84783	2.32169	2.31507	0.0021273	-1.29941	down
gene2485	551	256	461	3791	4164	8044	5.78216	3.36567	5.24526	47.2614	52.6802	91.2628	3.58654e-07	4.07379	up
gene24858	118	157	105	2322	3178	3922	0.77273	1.12218	0.692511	16.959	24.4246	27.064	4.59668e-27	5.01884	up
gene24859	29	54	25	288	751	316	0.393911	0.848593	0.364312	4.65508	11.6928	4.53233	0.00576844	4.04937	up
gene24860	257	173	154	402	868	875	2.70135	2.05547	1.708	4.89401	10.1418	9.4431	0.000993426	2.29562	up
gene24861	776	600	666	1057	1458	1778	4.39645	3.34173	3.94407	6.66581	8.75623	10.3822	0.000111969	1.48281	up
gene24897	536	330	365	795	2094	1704	8.84112	6.14653	6.35109	15.1832	38.3193	28.7962	0.00925976	2.32929	up
gene24948	437	351	385	76	52	70	4.7958	4.35039	4.44872	0.961246	0.62438	0.777967	0.000112946	-2.15728	down
gene24955	197	158	187	40	30	39	2.18386	1.97921	2.18195	0.503132	0.36826	0.440068	0.00971575	-1.90333	down
gene24980	919	776	777	1318	2107	1708	13.0497	12.797	12.0035	21.6523	33.1951	25.2444	0.000281949	1.47271	up
gene25066	1873	2182	1674	2471	3514	3839	8.23859	11.0857	7.21936	14.3439	16.1079	17.4411	0.00451882	1.17464	up
gene25124	19	35	6	644	1003	762	0.134572	0.277112	0.042741	5.30875	8.84287	5.544	3.19163e-22	5.70054	up
gene25125	9	12	17	212	352	193	0.125259	0.192357	0.271406	3.72882	5.92765	2.99406	4.04765e-08	4.73713	up
gene25126	15	14	28	492	1352	1038	0.111861	0.147008	0.263399	5.23304	13.7588	9.84337	9.01444e-08	6.08556	up
gene2519	96	9	141	5388	6908	7669	1.79677	0.304662	2.42231	170.178	209.594	212.369	1.88763e-51	6.80061	up
gene25202	570	623	596	1180	1070	1518	15.2784	18.8965	16.855	36.6181	31.8015	41.6908	0.000122578	1.47017	up
gene2521	44	55	40	5745	20962	12969	0.206037	0.294132	0.199886	31.7013	111.917	64.0665	1.70766e-07	8.56744	up
gene2522	54	106	28	3103	18044	9997	0.382141	0.852267	0.20448	25.4602	141.586	72.4761	0.000208156	7.75739	up
gene2527	772	740	868	2158	1352	2463	1.90397	2.0533	2.25209	6.10235	3.66759	6.06081	4.1644e-06	1.72481	up
gene25288	192	208	126	1403	2105	1620	4.64567	6.34123	3.23214	43.1133	61.3298	40.2945	8.62524e-15	3.69137	up
gene25359	9	13	10	61	130	80	0.168388	0.272521	0.195241	1.59912	3.45946	1.933	0.000147159	3.48824	up
gene25378	788	549	745	18850	32754	26977	13.5363	10.7272	13.519	377.032	633.941	478.035	7.21711e-19	5.66504	up
gene25390	14	15	10	100	207	465	0.410213	0.507612	0.296678	3.46878	6.90652	15.0306	0.00571777	4.68085	up
gene25396	10364	5031	9613	15750	20852	22640	248.475	134.035	243.245	414.565	532.035	512.449	0.000949782	1.67605	up
gene25421	258	177	146	453	292	405	3.5433	2.7431	2.04436	7.09866	7.00392	8.50813	0.00801487	1.39698	up
gene25423	371	227	305	461	681	589	8.11459	4.90077	5.72406	11.0484	11.4507	10.6861	0.00305244	1.36826	up
gene255	277	428	264	1731	1764	2022	4.60146	8.05445	4.63589	33.3594	32.5864	34.4832	1.62031e-15	2.89315	up
gene25506	35	26	5	618	313	976	0.303843	0.246022	0.032819	9.34484	4.41376	13.052	1.25913e-06	5.23496	up
gene2553	349	385	440	1692	1460	1317	3.05022	3.81678	4.05773	17.2064	14.4001	11.7556	2.13264e-10	2.33817	up
gene25539	4	0	11	350	498	429	0.037324	0	0.110275	5.49124	7.72429	9.3009	2.3161e-28	6.87578	up
gene25541	2432	782	1478	29650	21741	26953	44.4428	15.3343	28.5089	621.864	420.215	488.999	1.22681e-19	4.50325	up
gene25550	72	51	66	2087	6017	1847	1.11694	0.885732	1.07366	37.6576	104.108	29.5009	0.00223523	6.16993	up
gene25560	476	436	459	549	908	889	2.70115	3.85321	2.43328	3.63092	5.84634	6.03086	0.00614268	1.18609	up
gene2559	445	480	355	618	1092	895	3.69901	4.7703	3.11561	5.9247	10.5564	7.41491	0.00397203	1.43195	up
gene25597	755	563	762	938	1231	1258	18.1412	13.8541	19.055	21.9346	31.467	22.2164	0.00642766	1.13936	up
gene25601	177	117	67	413	312	443	1.14633	0.953563	0.454546	3.19656	2.51084	3.31014	2.75187e-05	2.10388	up
gene25612	5	0	0	151	302	431	0.047763	0	0	2.05108	3.93582	5.19784	3.55296e-11	7.95687	up
gene2562	28	29	39	448	1687	983	0.127677	0.150421	0.189384	2.42288	8.75144	4.70903	0.000557848	5.44776	up
gene25622	19	8	17	5641	15996	15410	0.367986	0.162932	0.356193	132.358	359.759	320.018	4.96676e-15	10.1563	up
gene2563	14	49	92	331	777	415	0.058557	0.242481	0.431425	1.70412	3.83551	1.88955	0.000931238	3.71092	up
gene25669	134	87	96	5816	10897	8725	1.68758	1.22954	1.27256	85.0301	152.699	112.903	6.56828e-19	6.75473	up
gene2568	370	337	296	948	1443	1771	4.55131	5.42297	4.67332	13.6327	22.8802	22.3871	1.51461e-07	2.45566	up
gene2570	1095	710	876	2079	2432	3329	38.262	28.0059	32.2576	84.0736	94.2781	119.166	1.25923e-07	1.96246	up
gene25704	2117	622	1219	5206	4489	6623	8.49661	2.82534	5.18676	24.2517	20.0756	27.2314	1.96245e-10	2.48253	up
gene25705	63	20	41	238	164	199	3.71021	1.26825	2.53572	16.1885	10.6875	11.9615	2.00524e-05	2.71983	up
gene25706	189	54	121	723	483	657	4.12406	1.27711	3.71597	18.0908	12.9214	15.9332	1.68492e-10	2.79853	up
gene25743	252	176	285	2401	3107	3994	2.01595	1.55449	2.4463	21.7779	26.9496	31.9725	9.34523e-23	4.15207	up
gene25822	2434	2108	1982	5238	4189	5885	6.44765	6.24371	5.49273	16.0374	12.3549	16.464	4.54113e-05	1.6344	up
gene25825	3714	2587	3009	4569	6352	6722	16.0051	11.9157	14.7849	20.4034	24.5786	28.5461	0.0020311	1.34093	up
gene25827	1328	1151	808	4785	4602	7985	8.34055	8.23403	5.36425	35.0476	32.2691	51.6482	8.16075e-09	2.79577	up
gene25904	71	40	82	177	164	227	1.68415	1.07616	2.0502	4.87082	4.32705	5.53223	0.00255224	1.9797	up
gene25918	497	330	471	755	493	979	1.73611	1.53435	2.81259	3.37176	2.08174	3.62236	0.0063684	1.18621	up
gene25925	30	54	57	220	423	455	0.19663	0.408595	0.403642	1.71816	3.17785	3.15203	3.88496e-07	3.35099	up
gene25935	9	20	13	1145	3402	3609	0.059701	0.068195	0.091107	13.2756	39.1321	35.8682	3.31541e-10	7.97588	up
gene25983	2908	994	2380	8906	8846	11536	17.6174	6.80813	18.2998	62.4768	58.4152	70.5106	2.20916e-10	2.65849	up
gene25996	364	225	302	24	15	56	1.54183	1.07822	1.3482	0.114195	0.066651	0.241212	4.82854e-06	-2.8374	down
gene26018	333	1242	1335	11	5	5	4.91901	20.7878	20.8313	0.172621	0.066424	0.060994	9.1067e-06	-6.73236	down
gene26022	670	519	659	1069	1589	1576	2.96351	3.34723	2.99548	5.25355	7.13074	6.64427	2.30965e-05	1.61399	up
gene2603	9	3	5	154	259	382	0.081117	0.024724	0.055147	2.89645	4.93692	6.92454	1.48382e-10	5.97983	up
gene2604	164	99	141	6455	11296	10571	2.28799	1.54104	2.05979	103.277	173.759	148.834	9.71064e-24	6.55928	up
gene26061	10	0	0	46	49	38	0.048826	0	0	0.251044	0.256057	0.189539	4.73432e-06	4.24295	up
gene26117	2593	2651	2645	5271	8443	7986	6.11473	7.2002	6.7174	14.5241	20.7678	18.8554	5.73438e-06	1.86792	up
gene26159	174	374	194	832	1335	1616	1.66564	3.97732	2.23364	8.34964	16.1166	14.9702	3.42981e-07	2.71809	up
gene26164	1026	761	977	4202	9260	8000	5.50691	4.87019	6.16485	26.1078	60.7222	43.8907	9.04772e-06	3.38004	up
gene26188	126	120	66	600	1201	1292	1.08556	1.29436	0.364479	5.1578	12.4793	11.8447	1.8999e-07	3.70944	up
gene26258	499	459	321	621	684	1098	2.98594	3.0678	1.94023	4.41579	4.53111	6.96726	0.00295355	1.30304	up
gene26274	267	127	171	437	942	1346	0.970852	0.729127	0.82676	2.42839	4.79916	6.51615	0.00446481	2.69123	up
gene26379	20	3	14	38	63	45	0.428224	0.018911	0.327947	1.02935	1.65054	1.08588	0.00657555	2.45138	up
gene26394	188	158	135	266	381	377	2.3133	2.59434	2.14242	5.26602	6.74655	6.80941	0.00587538	1.50179	up
gene26421	167	290	269	481	859	880	0.942497	3.18395	2.82005	3.23999	8.46723	8.59753	0.00011938	2.00226	up
gene26452	232	245	185	11	9	13	3.42451	4.08734	2.87342	0.186043	0.131355	0.196139	2.04361e-08	-3.93264	down
gene26469	355	125	68	2	0	0	6.30117	2.50475	1.26646	0.029118	0	0	0.00120823	-7.64945	down
gene26489	2006	1503	2157	3006	3170	3876	15.1675	12.8537	17.201	26.2997	26.5825	30.0141	0.00271642	1.24196	up
gene26512	463	420	532	908	1112	1376	1.48062	1.5217	1.79721	3.37137	3.96372	4.51903	1.30241e-05	1.67033	up
gene26546	926	1311	816	313	198	308	3.97803	6.37432	3.69801	1.55304	0.943292	1.35201	0.00903164	-1.51759	down
gene26594	728	250	253	2114	3415	8003	2.09989	0.763678	0.718056	6.6513	16.2746	24.7837	0.00974668	3.87553	up
gene26652	616	1051	790	1724	1223	1320	6.88907	13.3393	9.31803	22.3616	15.1657	15.1037	0.00275527	1.18305	up
gene26671	2352	2207	1841	3332	3667	4863	16.9087	17.5015	13.0182	27.7867	32.7195	35.8398	0.00166081	1.29011	up
gene26675	2667	3263	3616	5806	9282	8146	14.4243	20.545	20.6307	37.9446	57.9553	46.928	6.7247e-05	1.68989	up
gene26691	23	17	33	43	86	121	0.136946	0.116268	0.212947	0.304099	0.581115	0.759095	0.00970204	2.18777	up
gene26711	45	0	0	58	65	59	0.502012	0	0	0.753754	0.811319	0.680966	0.00430835	2.52158	up
gene26728	751	529	445	1302	1434	1524	3.59014	2.78404	2.03378	6.59607	6.51745	6.64577	5.16205e-06	1.72053	up
gene2673	91	57	85	138	211	290	0.525702	0.372123	0.513417	0.924682	1.34654	1.71681	0.0030795	1.87115	up
gene26737	329	274	371	927	904	1238	2.45562	2.31393	2.91506	8.00489	7.48194	9.46611	6.90689e-08	2.06416	up
gene26738	68	59	53	4196	4901	6667	0.748178	0.462537	0.525416	47.1379	53.7856	63.4085	7.71312e-52	6.85484	up
gene26742	457	361	385	76	79	87	5.76957	4.6312	5.30614	1.08131	1.08021	1.01874	0.000622963	-1.90011	down
gene26760	23	5	13	73	96	114	0.21884	0.051142	0.12365	1.33861	1.12103	1.23526	3.74017e-05	3.23815	up
gene26769	113	117	97	649	769	1301	1.40635	1.64401	1.26809	9.37128	10.645	16.6437	6.61568e-08	3.4447	up
gene26770	239	245	184	1668	1212	2710	2.40004	2.76912	1.72891	19.6343	10.3878	24.4947	6.30362e-07	3.44806	up
gene26813	25	33	39	589	1274	360	0.426628	0.624223	0.697252	11.7249	24.3077	6.33551	0.00427083	4.95123	up
gene26817	85	79	93	150	286	196	1.204	0.872222	0.958776	1.8102	3.99904	2.38255	0.00769075	1.72026	up
gene26832	801	644	710	1258	1729	1472	3.05612	3.05491	2.67747	5.76417	8.67457	5.84398	0.000147904	1.46882	up
gene26877	2940	2655	2904	8394	9035	10397	33.49	34.2203	34.8924	110.656	114.157	121.303	4.39174e-07	2.11927	up
gene26934	2212	3439	3371	6384	6091	6071	21.0488	36.8222	33.7125	70.8666	64.2399	59.1647	0.000649975	1.43498	up
gene26951	6302	4186	4829	6679	10762	9639	23.0111	17.2315	18.5582	28.2833	42.9888	36.0642	0.00989557	1.24687	up
gene26966	579	1214	1040	1697	1461	1953	2.37113	5.62908	4.51937	8.04708	6.74789	8.18462	0.00145575	1.22921	up
gene26983	4415	4514	3701	8097	12785	12578	49.066	56.8535	43.2943	105.706	160.214	145.578	4.52226e-05	1.81021	up
gene26987	1087	787	518	2107	2423	2870	12.5361	10.2823	6.30353	28.1478	31.028	33.9158	3.21518e-08	2.03977	up
gene27046	300	439	311	642	1531	1225	3.24991	5.39096	3.55104	8.09152	18.5166	13.6512	0.00824981	2.09132	up
gene27070	64	44	87	683	1101	1834	0.978303	0.749244	1.44518	12.4812	18.8909	28.4117	1.30069e-06	4.62277	up
gene27138	1353	1040	1197	2669	6464	4310	19.9601	17.1482	19.206	46.4974	109.503	66.8891	0.00982287	2.33345	up
gene27162	152	151	136	565	755	715	2.63613	2.93942	2.60472	11.3064	14.4327	13.3694	4.13917e-10	2.62071	up
gene27221	935	531	614	1610	2228	1772	9.56837	5.99174	6.34383	18.1257	24.8866	17.8001	6.69687e-07	1.86467	up
gene2723	740	1041	715	1634	1391	1763	4.25346	7.00223	5.11374	8.51562	8.4983	10.98	0.000528544	1.32613	up
gene27231	1748	1292	1091	8129	5205	6625	17.3128	14.4395	11.424	93.9644	57.636	67.8258	9.45901e-12	2.68408	up
gene27250	1019	894	973	1239	1578	1997	19.2681	19.6684	19.4512	26.4314	32.4489	38.7929	0.00469808	1.14396	up
gene27260	552	595	396	797	1074	1762	5.99038	7.32676	4.53395	19.3095	12.9212	19.5804	0.00969581	1.62081	up
gene27265	150	350	161	662	773	935	1.15432	3.05711	1.30618	8.103	6.61887	15.5022	2.01903e-08	2.20661	up
gene2728	26	41	19	174	268	227	0.251781	0.444486	0.191195	1.94795	2.87506	2.25149	5.14904e-08	3.34634	up
gene27289	224	157	279	6727	7583	11130	1.59324	1.68833	2.10328	72.16	77.6995	94.8479	1.32127e-31	5.68161	up
gene27304	15	11	5	501	1248	717	0.159082	0.21364	0.047941	6.83138	16.6471	8.63777	9.91087e-08	6.74166	up
gene27307	93	148	93	232	359	478	0.850252	1.54314	0.90472	2.46808	3.67279	4.50814	0.000160948	2.05586	up
gene27327	112	140	123	426	772	764	1.24661	3.37226	1.35312	7.68372	12.1517	16.3315	4.26424e-07	2.7862	up
gene2735	48	31	48	297	536	453	1.01096	0.811213	1.07627	7.40686	12.8567	10.0475	5.10432e-10	3.7694	up
gene27372	774	488	619	1228	1209	1848	5.92422	4.22725	4.87094	11.2694	9.72841	14.4753	2.46841e-05	1.60077	up
gene27385	68	53	68	177	236	259	1.09714	0.960984	1.15526	3.31347	4.23506	4.29369	0.000230856	2.24519	up
gene27394	116	74	75	245	284	194	0.751751	0.830874	0.567426	2.13779	2.1349	1.54678	0.00205874	1.88023	up
gene27419	74	71	56	4	0	9	0.290259	0.316471	0.232945	0.014912	0	0.032638	7.06882e-05	-3.59747	down
gene27437	508	235	331	54	84	134	6.95835	4.12024	6.73048	1.00353	1.18473	2.17424	0.00901848	-1.56139	down
gene27500	136	36	56	0	2	0	1.31522	0.387599	0.568958	0	0.012262	0	0.000577792	-6.30947	down
gene27511	499	480	494	1540	1184	2315	4.10388	5.24667	3.88372	14.2348	10.9108	20.5079	6.33837e-06	2.16663	up
gene27528	2087	2088	1905	3122	4660	3476	17.3417	19.6108	16.6639	29.1691	43.5401	29.501	0.00165984	1.30314	up
gene27541	479	434	416	133	105	125	2.20986	2.26716	2.02161	0.704099	0.538445	0.588503	0.00828594	-1.4656	down
gene27542	1411	1640	1109	2629	3281	3666	15.2317	20.1067	12.5729	32.9429	39.5288	40.7574	3.01157e-05	1.59757	up
gene27572	974	1175	1291	1900	1703	2312	7.42893	8.68333	8.73424	17.0498	14.5017	16.8382	0.00309342	1.17792	up
gene27610	412	445	523	1102	1117	1337	8.25222	10.1751	11.125	25.7585	25.0699	27.66	2.91857e-06	1.76858	up
gene27626	51	42	34	5	0	8	0.428569	0.425039	0.341974	0.039763	0	0.068095	0.00195635	-2.92286	down
gene27643	2298	2023	1935	2686	3764	4371	7.68231	7.64698	6.81523	10.3338	13.9442	14.9149	0.00427933	1.19712	up
gene27661	318	379	288	659	535	616	4.59899	5.58905	4.46516	10.7136	7.99268	8.2651	0.00451633	1.27355	up
gene27769	498	539	465	734	962	891	6.32915	7.75055	6.23534	10.7881	13.5562	11.5988	0.0048633	1.18973	up
gene2778	595	492	468	1166	1729	2409	1.89096	1.77117	1.56876	4.16565	6.55369	7.95745	5.30713e-05	2.17307	up
gene27787	11	19	22	404	592	523	0.061678	0.130474	0.14154	3.79059	5.20516	4.16271	8.37467e-24	5.26733	up
gene27788	448	375	390	589	810	901	2.549	2.41435	2.34185	3.87839	5.11718	5.25759	0.00159492	1.33344	up
gene2779	804	717	727	1230	1470	1463	3.15527	3.18236	3.01199	5.58885	6.40419	5.88437	0.000993426	1.30052	up
gene27803	423	721	744	1020	1436	1325	2.84368	5.56411	5.34387	8.05144	10.8211	9.20031	0.000299671	1.39756	up
gene2781	1041	893	914	1405	1899	1777	8.91015	9.02926	8.00228	13.3552	17.2062	14.804	0.00173194	1.24958	up
gene27818	105	115	93	13	13	25	1.02485	1.27575	0.95847	0.147186	0.132878	0.245734	0.00786547	-2.23365	down
gene27850	214	242	77	889	1469	892	1.35483	2.44082	0.747496	8.88185	12.9858	7.85497	1.07472e-05	3.01293	up
gene27853	0	0	0	226	737	1289	0	0	0	1.7428	5.45056	8.80403	4.07385e-08	Inf	up
gene27913	1027	917	1535	1866	3013	3194	5.1212	4.81655	7.61651	10.6794	18.2694	16.7897	0.000158281	1.62939	up
gene27946	316	270	310	437	547	612	3.10818	3.01811	2.98273	5.13268	6.21195	5.86876	0.00892358	1.24371	up
gene28047	125	68	64	289	361	375	0.916361	0.770232	0.490464	3.20021	3.97431	3.57307	4.81261e-06	2.42234	up
gene28061	1133	774	769	2256	2256	1968	12.0193	9.28934	8.60803	27.7058	26.5525	21.3882	7.02749e-06	1.69972	up
gene28076	188	146	158	1461	1291	2294	1.65762	1.49545	1.4648	15.2553	10.2929	17.3457	7.77843e-14	3.75974	up
gene28129	1131	959	1070	1762	2154	2137	20.8449	19.9876	20.7955	37.5726	44.0187	40.3238	0.000548057	1.35191	up
gene28144	555	136	306	10229	14434	13863	4.48611	1.19773	2.79113	97.4431	135.971	120.056	1.51778e-34	5.7264	up
gene28156	609	538	537	819	1274	1434	6.37017	6.5773	5.9535	10.0358	14.9515	15.6316	0.000160748	1.47416	up
gene28166	316	196	283	9	96	27	2.25466	1.5847	2.13006	0.069953	0.755369	0.194617	0.000628002	-2.12749	down
gene28249	688	295	596	1051	1222	1055	4.90071	2.35946	4.34219	9.0465	9.84857	8.05584	0.000143909	1.51756	up
gene28272	1097	570	569	1560	2959	2396	7.48571	4.39581	4.09342	12.3157	22.3976	16.7479	0.000561433	2.06395	up
gene28275	1037	1156	1087	2352	3222	3477	7.83601	11.168	8.19806	20.2911	27.3793	27.3859	6.27791e-07	1.86553	up
gene28279	161	84	150	30	3	35	2.09621	1.21748	2.01405	0.430284	0.034454	0.499244	0.0075992	-2.14104	down
gene28286	128	150	82	5319	9393	7801	0.826382	1.09245	0.557574	39.7411	67.2496	51.5734	3.23953e-21	6.36662	up
gene28295	141	134	45	4754	8480	7843	1.21291	1.3032	0.40676	47.8177	81.7672	69.8338	5.2236e-22	6.44266	up
gene28324	77	127	131	23	23	6	0.367991	0.688216	0.660651	0.122175	0.11843	0.02875	0.00505571	-2.26753	down
gene28337	640	533	274	75	36	73	4.5413	4.15542	2.02305	0.585568	0.269605	0.525046	0.000440303	-2.58175	down
gene28346	522	458	427	44	162	82	2.29299	2.20206	1.90468	0.196912	0.75277	0.362938	0.000329767	-1.85771	down
gene28349	1677	1848	1873	3976	4866	6018	3.78748	4.2043	3.52513	8.26148	9.52451	11.0219	1.83222e-06	1.85978	up
gene28371	336	357	587	1349	1298	797	6.41132	7.29602	10.9939	27.8073	25.3998	14.73	0.000378686	1.85244	up
gene28374	91	160	112	364	951	1484	1.64704	1.384	0.580399	4.64041	9.18604	11.6918	0.00708863	3.31654	up
gene28396	123	62	69	1760	3076	4727	1.05658	0.616117	0.61501	15.9914	26.901	39.6586	5.87839e-09	5.65159	up
gene28406	18029	16944	27949	4528	5094	7000	74.9873	97.3399	152.314	26.4551	24.2014	38.1182	0.0022684	-1.51361	down
gene28434	315	291	307	1066	1634	997	1.8579	1.94457	1.91251	7.30134	10.7264	6.14069	3.81961e-05	2.44132	up
gene28447	480	204	316	1637	1271	1538	4.6515	2.21767	3.22366	18.4483	13.6116	15.2314	3.41783e-12	2.58611	up
gene28462	231	83	105	583	772	1022	1.66131	0.676357	0.794924	4.86588	6.17376	7.55105	5.9249e-11	2.93835	up
gene28468	150	97	68	20	13	18	0.821094	0.602939	0.394586	0.121854	0.077154	0.10042	0.0076953	-2.21358	down
gene28476	6	24	44	389	612	812	0.060906	0.29008	0.516519	4.824	7.58006	8.86513	2.23419e-13	5.00096	up
gene2851	644	642	711	5973	8052	9028	5.96262	7.20692	6.96539	70.7206	90.5185	89.6027	3.57424e-22	3.9346	up
gene28553	119	145	104	250	197	396	7.54965	10.4903	6.99835	18.3071	13.8878	25.8698	0.00581193	1.57499	up
gene28587	153	174	197	14	14	29	2.51049	2.99336	2.98621	0.122275	0.13672	0.250999	0.000106574	-2.81535	down
gene28673	71	41	101	129	195	239	1.12323	1.03777	2.59097	3.49958	5.75948	5.60088	0.00617393	1.82707	up
gene28676	45	75	60	303	493	430	1.2131	2.31687	1.715	9.62444	15.0345	12.1012	2.86801e-10	3.16074	up
gene28678	38	27	49	76	202	176	0.300093	0.239621	0.568503	0.701414	1.8495	1.57097	0.00723765	2.42073	up
gene28690	60	4	63	694	299	692	0.582698	0.035002	0.645455	7.87376	3.24448	6.94334	1.35254e-07	4.17969	up
gene28691	35	55	41	458	228	513	1.02309	1.81956	1.26767	15.5599	7.40508	15.4343	7.85598e-08	3.5666	up
gene28709	381	666	322	1269	2805	1719	6.70191	13.2763	5.98067	25.8845	54.8344	31.0167	0.00547527	2.47418	up
gene28712	837	701	626	1798	1016	1288	4.44773	4.34613	3.67485	10.6828	5.58383	6.77006	0.00288833	1.33095	up
gene28729	197	217	142	241	437	460	2.50143	3.14841	1.89518	2.85762	6.23096	6.097	0.00669748	1.43057	up
gene28828	1001	1282	1037	1917	2557	2359	10.5761	15.2044	11.4099	22.9475	29.3233	24.3971	0.000171017	1.4406	up
gene2884	93	187	87	883	1041	1073	0.440161	1.00429	0.433072	5.22459	6.0336	5.21826	3.14453e-18	3.40327	up
gene2886	120	128	64	513	921	505	0.354764	0.410988	0.210417	1.90378	3.21158	1.75771	0.00021706	3.04936	up
gene2888	72	55	57	3	5	13	0.135075	0.117973	0.11279	0.006526	0.008516	0.023419	0.00229314	-2.74493	down
gene28893	173	253	204	396	448	651	2.67535	4.44384	3.33698	7.1185	7.7117	10.3686	0.000357034	1.62936	up
gene28905	26	79	30	150	151	177	0.843648	2.97663	1.04032	5.81165	5.62287	6.07732	0.00100606	2.17903	up
gene28925	548	574	548	1572	2972	2416	4.46101	5.36389	4.7885	15.0538	27.5093	20.4264	2.61908e-05	2.47038	up
gene28956	514	426	491	1392	1550	1920	3.53218	3.47972	4.0905	10.9784	11.8026	13.869	3.20092e-09	2.17373	up
gene28958	539	555	541	911	1214	1378	4.22909	4.93263	4.47785	8.28195	10.5711	11.1395	0.000101226	1.50194	up
gene28963	106	62	101	248	414	353	0.710759	0.467567	0.713161	1.92108	3.07954	2.42452	1.02585e-05	2.34817	up
gene28992	0	5	3	62	41	69	0	0.055284	0.025814	0.863816	0.541493	0.846285	1.12947e-07	4.75678	up
gene29	259	163	147	7440	11678	10679	2.8968	1.72193	1.61081	105.134	140.04	116.674	2.83043e-31	6.13503	up
gene2901	215	164	261	42	15	47	1.50083	1.29364	1.92274	0.334568	0.115487	0.331736	0.00127095	-2.22338	down
gene29027	1449	1187	1092	1964	2864	2817	15.9747	14.7938	12.6938	25.05	35.0161	31.8004	0.000194539	1.4495	up
gene29028	506	310	470	80	51	96	4.23524	3.35201	4.25181	0.884372	0.274143	0.886214	0.000116248	-2.09029	down
gene29043	523	552	482	965	786	1554	6.8152	7.85159	6.38351	14.2847	11.2606	20.4863	0.00271642	1.4725	up
gene29048	2445	1260	1835	588	564	565	13.4816	7.9668	10.7167	3.86778	3.46622	3.22169	0.00131004	-1.25825	down
gene29092	2009	1692	1532	6544	6774	10004	13.8157	13.0276	11.1272	51.9152	51.4455	70.5245	1.68272e-10	2.55751	up
gene29107	448	390	342	964	2444	2101	3.42444	4.1585	2.71317	8.8339	23.2706	19.0763	0.00199181	2.63746	up
gene29126	177	148	172	25459	44080	43189	1.11069	0.977794	1.22412	337.588	551.355	500.908	8.16508e-33	8.24028	up
gene29154	423	326	318	63	28	37	1.83881	1.65787	1.1176	0.487174	0.272704	0.289312	4.48765e-06	-2.64729	down
gene29156	2025	1051	1604	2983	2218	4660	5.9581	3.43214	4.4085	9.88908	6.32028	14.3819	0.00710911	1.48787	up
gene29177	1181	1145	927	1485	2371	3085	6.28758	6.89852	5.20401	9.15166	14.005	16.8274	0.00384317	1.49116	up
gene29197	46	20	7	274	541	519	0.346403	0.166723	0.049048	2.42026	4.58807	4.0615	1.82601e-10	4.62645	up
gene29201	3202	2994	2796	4522	5896	6779	112.869	119.412	103.947	184.461	230.516	244.747	0.00171081	1.3403	up
gene29211	109	283	193	599	322	499	0.693992	2.12208	1.40573	4.60035	2.54162	3.49456	0.00136982	1.64591	up
gene29353	3034	1652	2521	4980	6396	6661	32.0642	19.5242	28.4168	59.8317	69.5861	67.7529	1.98871e-05	1.7522	up
gene29480	934	833	798	323	184	280	5.47529	5.47544	5.01466	2.08947	1.1793	1.47802	0.00367816	-1.30204	down
gene29481	952	702	984	287	225	292	4.41198	3.29805	5.45179	1.44299	1.08232	1.51095	0.00321044	-1.29958	down
gene29495	53	20	24	3883	4562	4259	0.332501	0.168715	0.152826	30.7846	32.4672	30.0387	2.73386e-61	7.47591	up
gene29518	1862	1346	2083	2917	4537	3491	18.7296	15.3227	22.1019	33.9565	50.624	35.9674	0.000440303	1.4775	up
gene29528	32	21	18	227	177	169	0.656507	0.50295	0.3707	5.57746	4.13667	3.64905	1.37152e-07	3.43496	up
gene29573	5732	5902	5406	8854	16524	19362	30.3184	32.6886	25.1796	57.3103	92.5376	102.072	0.00229961	1.79275	up
gene29576	8542	9302	8718	35160	46125	46155	112.387	138.466	120.997	535.33	673.122	621.944	8.73026e-07	2.66644	up
gene29585	186	193	275	387	627	659	0.99973	1.13677	1.54078	2.21139	3.56128	3.07999	7.30153e-05	1.76443	up
gene29586	101	118	23	490	827	927	0.927856	1.24238	0.214684	5.2053	8.41321	8.77925	2.80436e-10	3.5959	up
gene29592	15	21	21	164	173	180	0.106331	0.168136	0.162147	1.39908	1.41332	1.3612	9.70775e-08	3.57829	up
gene29612	182	158	164	770	1087	1519	4.43319	4.36421	4.20854	21.7635	29.4628	38.0394	8.34873e-09	3.1461	up
gene29639	1728	1203	1354	218	308	142	13.2889	10.3183	10.9317	2.02441	2.72152	1.17228	2.50873e-09	-2.24215	down
gene29647	43	57	33	356	488	281	0.362705	0.547853	0.291569	3.50836	4.70842	2.45377	5.33804e-08	3.48584	up
gene29660	2139	1707	2243	4036	5685	4739	13.2128	12.5349	15.2578	27.6986	40.0086	28.934	3.39318e-05	1.67009	up
gene29664	75	54	60	396	1160	922	0.40359	0.32702	0.333587	2.46652	6.92878	5.08159	0.000144537	4.13802	up
gene29670	929	826	726	1321	1729	2647	4.94093	5.00468	4.0737	8.0912	10.1009	14.3043	0.00157014	1.59657	up
gene29678	45	69	55	0	3	0	0.404095	0.711594	0.527498	0	0.020583	0	2.25949e-07	-5.35291	down
gene29684	834	707	740	1415	1175	1217	8.50165	9.07783	8.90202	17.2927	11.9127	13.5988	0.00505571	1.15212	up
gene29688	1039	533	725	19354	22944	29765	6.81495	4.31321	4.64858	115.914	135.303	155.973	6.68924e-27	5.39531	up
gene29692	981	959	863	73	257	347	10.648	12.1013	10.0812	0.915273	3.08594	3.89925	9.10892e-05	-1.65419	down
gene29739	193	172	231	938	1008	1122	1.07507	1.08295	1.3617	6.06516	6.25002	6.42539	5.84039e-13	2.77578	up
gene29746	2077	1827	2128	3535	6252	6345	22.8216	22.7498	24.6361	44.7922	76.0549	71.4855	0.000153888	1.83152	up
gene29749	471	290	415	790	1638	1571	2.06734	1.44626	1.98399	3.93165	7.73085	6.99613	0.000684567	2.19214	up
gene29755	1609	1460	1537	344	290	408	15.4	15.7811	15.3036	3.83691	3.07204	4.07028	5.77806e-06	-1.74118	down
gene29759	270	207	340	884	1156	1262	1.49028	1.25407	2.02598	6.44756	6.85237	7.72348	1.53609e-10	2.43313	up
gene29779	3923	3390	4128	10490	17440	18392	32.4247	31.1259	35.7401	99.0265	157.587	152.666	2.08892e-07	2.42975	up
gene29791	365	246	640	2462	4561	2970	1.40134	1.07051	2.59583	11.1445	19.9127	12.0135	3.54612e-06	3.43762	up
gene29801	138	127	213	356	316	337	0.699293	0.731099	1.14027	2.84437	1.77546	1.75418	0.00669395	1.49318	up
gene29806	5225	8072	4806	15347	25076	21823	35.2058	43.5104	29.0779	110.357	141.62	130.134	4.71603e-06	2.17199	up
gene29807	18	3	6	67	131	120	0.161466	0.016669	0.045564	0.561623	1.0545	0.890984	3.04074e-07	4.02402	up
gene29813	0	0	0	136	228	60	0	0	0	3.29294	5.37263	1.25716	1.49048e-06	Inf	up
gene29820	0	9	9	148	94	41	0	0.074138	0.068688	1.3841	0.845204	0.340795	0.00140675	4.3529	up
gene29824	78	97	121	274	364	615	1.12238	1.58617	1.8369	4.59563	5.85679	9.12757	0.000311138	2.47064	up
gene29828	556	464	486	917	1065	1157	7.68081	8.00849	7.11373	15.8294	17.644	18.1	0.000191393	1.4712	up
gene29829	2435	2075	1901	39370	51427	63337	35.9099	34.6267	29.5647	672.047	841.403	956.868	3.17353e-18	4.99319	up
gene29830	2022	1673	2266	3447	5140	4695	13.7634	12.8863	16.2749	27.1571	38.8199	32.7374	9.25018e-05	1.57486	up
gene29840	0	0	3	35	33	50	0	0	0.027501	0.20668	0.306023	0.402558	3.667e-08	5.73175	up
gene29845	0	0	0	69	148	228	0	0	0	2.25544	4.64868	6.60909	7.92056e-10	Inf	up
gene29886	93	336	304	609	519	706	0.626863	2.68802	2.17852	5.31335	4.09314	5.58754	6.24258e-05	1.69153	up
gene29895	722	532	526	10393	22871	13841	3.66049	3.04975	2.81456	61.0293	133.03	71.9327	4.08577e-07	5.15718	up
gene29939	626	377	736	186	112	123	1.79891	1.22753	2.2289	0.617444	0.356212	0.361654	0.000877441	-1.61854	down
gene29949	289	273	628	3	8	17	0.868228	1.36322	2.08217	0.007067	0.026575	0.05	6.85275e-06	-5.01545	down
gene29957	687	724	700	271	230	173	3.86946	4.61531	3.7481	2.08226	1.402	1.17071	0.00941489	-1.23424	down
gene29999	417	301	352	631	841	860	9.4886	7.73671	8.4536	16.6135	21.2236	20.0475	0.000189878	1.54262	up
gene30	7	10	45	1613	3021	1706	0.069301	0.139884	0.50481	20.3791	36.922	18.6142	2.83606e-12	7.11543	up
gene30010	585	534	548	1399	1993	2654	3.95316	3.54455	3.39375	10.1595	13.2188	17.2406	1.02918e-06	2.26074	up
gene30033	452	406	434	1046	1354	1601	2.24784	2.47086	2.48909	6.61916	7.8693	8.96143	4.23347e-08	2.03758	up
gene30081	1293	1045	1310	2214	3149	2529	23.7872	21.744	25.4204	47.1463	64.2561	47.6501	7.83076e-05	1.53574	up
gene30097	953	851	851	275	280	329	9.14807	8.9283	8.48478	3.09743	3.03674	3.30568	0.00902379	-1.17944	down
gene30142	921	1284	978	1969	2722	2499	7.2984	11.2744	8.35138	18.2252	23.4797	21.1592	3.16524e-05	1.57146	up
gene30154	171	185	176	316	409	491	1.49447	1.76743	1.27608	3.25355	3.91326	4.71041	0.00144571	1.59189	up
gene3019	432	302	378	949	1183	1134	3.11648	2.02497	2.74754	7.35824	8.72635	6.97543	2.48618e-07	1.9765	up
gene30197	368	318	270	517	557	694	1.98827	1.88069	1.48842	3.12394	3.22533	3.71366	0.00444408	1.2918	up
gene3021	52	67	52	722	879	1696	0.327626	0.431842	0.409684	5.47235	6.78726	11.6528	3.53612e-07	4.64603	up
gene30250	32	35	31	79	109	147	0.535225	0.739443	0.433882	1.15109	2.09188	2.10434	0.00396484	2.16759	up
gene30267	117	100	148	443	1113	736	1.65183	1.55312	1.91501	5.18343	17.573	10.1515	0.00174468	3.07905	up
gene30295	368	573	295	591	1094	1077	1.21147	2.22871	1.01892	1.70294	3.57727	3.74878	0.00655348	1.54414	up
gene3030	2286	1286	2036	10724	21938	9423	61.0179	38.8231	57.3237	331.314	649.602	257.631	0.00452545	3.35892	up
gene30327	212	203	109	351	446	280	1.33575	1.42884	0.707901	2.53322	3.09329	1.79615	0.00690013	1.45388	up
gene30360	656	355	818	994	966	1126	3.28599	2.49257	4.74803	5.28832	5.60394	5.61672	0.00502535	1.18336	up
gene30385	4148	3162	4230	27779	41058	34135	36.3995	31.3869	39.1483	282.069	399.599	306.764	3.11881e-12	3.58141	up
gene30396	1526	1376	1360	2949	3058	3945	14.7243	15.0151	13.8431	32.9319	32.7256	38.9917	2.34483e-05	1.6275	up
gene30407	99	94	131	218	273	343	1.21192	1.16768	2.19343	3.21956	3.78941	3.42823	0.00206374	1.77074	up
gene30426	485	537	460	2542	3079	3924	11.2098	14.0405	11.2131	68.0142	78.974	92.9286	6.30522e-17	3.0828	up
gene30435	153	146	106	670	663	1122	3.14844	2.15946	4.02039	3.93459	18.6656	25.9987	4.66828e-10	2.99099	up
gene30436	104	82	76	481	398	629	3.0037	2.84717	2.57617	16.5055	12.3302	19.2139	3.04907e-10	2.92816	up
gene30451	126	87	93	743	575	1399	1.26979	0.983148	1.05274	9.4917	6.7604	15.7434	4.07915e-05	3.54735	up
gene30616	37	0	47	96	166	151	0.528488	0	0.790033	2.66056	3.23556	2.50746	0.000121172	2.77016	up
gene30619	877	1172	710	8539	9358	12391	13.8258	20.8393	11.7968	156.802	163.84	200.171	3.7841e-20	3.84058	up
gene30641	13	20	10	52	94	96	0.123422	0.212465	0.091643	0.569286	0.982852	0.929465	0.000273217	2.87563	up
gene30649	540	502	570	1623	2085	1941	6.11688	7.3221	8.15241	24.952	33.1488	25.458	1.29128e-09	2.22241	up
gene3084	755	586	675	4678	7013	6617	3.45877	3.03639	3.25838	24.8	35.6383	31.0499	6.52905e-19	3.60129	up
gene3087	501	460	396	1541	1689	1995	11.4328	11.0754	9.49986	34.9084	37.8072	44.0826	1.16197e-10	2.3493	up
gene30923	615	818	644	1575	2321	1877	6.92952	11.5453	7.68977	17.1898	30.4009	21.2793	5.54184e-07	1.87607	up
gene30991	78	38	43	309	237	320	2.35197	1.29767	1.35069	10.8813	7.99048	9.89278	3.79647e-07	2.87081	up
gene31	182	147	142	610	350	688	3.78547	3.49737	2.66412	11.3338	6.12857	10.3317	2.50717e-06	2.2061	up
gene31014	657	1028	659	2870	12560	12581	8.95867	15.9286	9.54951	45.0455	192.379	177.457	0.00407914	3.96478	up
gene31027	704	573	657	957	1616	1867	6.50188	5.88504	6.45901	10.2545	16.0523	17.1349	0.000825363	1.6096	up
gene31041	323	356	239	410	817	792	2.84895	3.77135	2.18001	4.40085	7.94037	7.14019	0.00951492	1.53697	up
gene31053	1039	570	435	1601	2118	1368	7.09819	4.40301	3.13603	12.6607	16.055	9.56977	0.00043643	1.75319	up
gene31105	35	2	2	40	104	127	0.133168	0.004446	0.004145	0.178466	0.445836	0.502654	0.00307685	3.27703	up
gene31109	132	144	167	15378	16011	17106	9.52059	11.735	12.7396	1287.01	1284.36	1267.08	2.67651e-45	7.17994	up
gene31122	2894	1937	2302	6145	3925	8562	14.349	12.9928	12.7366	36.9351	25.9982	44.9235	0.00081181	1.78856	up
gene31133	952	786	1016	137	416	175	5.70048	5.0824	5.37663	2.76311	2.28787	1.69007	0.000372912	-1.47923	down
gene31134	113	126	14	501	169	480	1.21232	1.5299	0.150717	6.22242	2.00858	5.2705	0.00649378	2.55177	up
gene31141	1721	1175	1496	3351	3186	2734	18.4173	14.2414	14.6668	45.6579	42.6538	28.75	0.000143909	1.50395	up
gene31149	357	410	331	580	801	625	4.23119	6.06682	4.69816	7.81498	11.2267	7.22149	0.00371905	1.2766	up
gene31157	824	632	688	2005	3851	3809	3.11784	2.70936	2.73037	8.65048	16.0924	14.6624	1.28822e-05	2.58902	up
gene31170	11	14	3	132	270	288	0.119189	0.173504	0.025177	1.93418	4.50763	4.44813	5.80942e-10	5.00383	up
gene31180	121	150	144	21	25	13	0.629266	0.883392	0.788831	0.12278	0.140204	0.064372	0.00174278	-2.39785	down
gene31221	30	29	22	285	388	525	0.251858	0.319665	0.193419	3.49969	4.47597	5.34307	1.23186e-15	4.28307	up
gene31247	1268	992	1184	1730	2298	2275	23.4705	20.7699	23.1237	37.0507	47.1777	43.1371	0.00118671	1.28921	up
gene31260	69	42	43	357	775	296	0.824078	0.607573	0.591399	2.62419	5.9754	3.89176	0.00781878	3.66193	up
gene31286	552	547	516	147	160	164	6.17955	6.91991	6.09239	1.89451	2.00008	1.85157	0.008203	-1.37099	down
gene31311	672	377	297	874	1346	1217	4.29329	3.10254	1.65454	4.17348	13.1821	10.4734	1.39256e-05	1.78079	up
gene31317	924	656	909	2985	4348	5146	15.0632	12.1666	15.6523	56.6044	78.1033	85.3684	5.37088e-11	2.74199	up
gene31339	380	355	363	1259	1771	1418	2.98579	3.15671	3.01553	11.4733	15.4715	11.4338	4.37245e-11	2.43421	up
gene31344	541	546	528	42	30	68	2.8754	3.34589	2.82712	0.247635	0.152606	0.344839	7.92845e-10	-3.14167	down
gene31363	578	412	480	789	899	976	1.92092	1.93967	1.66687	3.22345	3.67789	3.72477	0.00226988	1.27544	up
gene31375	172	191	244	991	2430	2764	5.63236	7.05875	8.42663	37.5887	88.3384	92.779	5.10792e-05	3.75185	up
gene31396	686	431	522	879	1348	1305	3.1894	2.18615	2.42561	4.75699	6.83969	6.15499	9.01955e-05	1.53238	up
gene31495	617	515	496	1171	1796	1201	6.63988	6.27027	5.62745	14.5908	21.4485	13.2439	0.000323712	1.77992	up
gene31537	233	203	211	43	27	30	1.69174	1.6791	1.62267	0.354347	0.203956	0.217221	0.000774848	-2.28254	down
gene3154	6738	6085	6725	224	156	224	40.121	41.4411	42.566	2.53792	1.52523	1.58542	7.08161e-31	-4.61228	down
gene31551	3	9	13	56	54	47	0.02005	0.091653	0.128314	0.639541	0.589766	0.472054	0.000345966	3.04615	up
gene31555	65	42	71	7	9	6	1.76204	1.26556	2.03623	0.217226	0.250928	0.166385	0.0037746	-2.58015	down
gene31595	151	179	118	647	2103	2020	1.27521	1.65921	1.00529	6.52808	20.444	18.0834	0.000735943	3.8094	up
gene31599	923	1245	1118	14394	10764	16792	6.54372	10.1145	8.57433	118.68	79.9513	122.025	3.47529e-20	4.06101	up
gene31633	11	27	5	64	78	36	0.062488	0.170642	0.024494	0.418221	0.494125	0.208612	0.00395799	2.42317	up
gene3164	318	321	268	733	805	851	2.23116	2.22149	1.67084	5.4219	5.22503	5.16116	7.19464e-06	1.80109	up
gene31655	238	271	237	613	711	958	1.59506	2.05772	1.68127	4.76456	5.30117	6.59838	5.84192e-07	2.00657	up
gene31668	0	2	0	85	126	161	0	0.011308	0	0.532142	0.750338	0.892161	1.80829e-15	7.81559	up
gene31671	2855	2920	3508	13329	27017	20906	20.0069	23.1474	25.9262	108.087	209.979	150.032	7.50059e-06	3.13836	up
gene31673	641	601	700	1377	1337	1819	3.07434	3.22241	3.88346	7.87913	7.24062	9.19224	1.48008e-05	1.62639	up
gene31693	136	93	159	719	795	1413	2.04894	1.5865	2.53074	12.5935	13.3406	21.91	2.78363e-07	3.32311	up
gene3170	8672	12809	12045	21863	31483	29497	149.314	246.587	218.555	418.927	579.337	499.661	0.00137227	1.70217	up
gene31707	1192	977	1006	1641	2324	2002	9.38057	8.69521	8.34515	14.9395	20.2907	16.1377	0.000757919	1.32843	up
gene31734	380	376	310	1419	1207	2044	3.11116	4.77015	3.06225	17.6243	14.886	20.7491	1.69742e-11	2.52343	up
gene31737	1496	1434	1572	4728	5211	7168	18.3603	19.9075	20.356	67.1677	70.951	90.1257	1.98301e-09	2.32721	up
gene31791	2391	1028	1114	18596	27008	30664	19.0933	9.24521	9.4512	172.19	239.705	251.193	7.15332e-20	4.50489	up
gene31833	455	560	471	1281	1755	1645	3.68983	5.13317	4.028	12.0347	15.8076	13.6802	2.1851e-08	2.05597	up
gene31847	148	159	183	0	3	7	1.14384	1.45878	1.55834	0	0.018634	0.04512	2.35817e-10	-5.24024	down
gene31852	697	588	526	2843	4550	3529	4.50114	4.29727	3.58254	21.2503	32.6068	23.3475	1.02674e-09	3.01112	up
gene31864	600	421	527	1328	1467	1881	7.22077	6.00643	7.30303	19.6042	20.8081	26.1946	5.60553e-08	2.009	up
gene31866	128	122	181	3429	3223	4566	0.915413	0.965837	1.31371	27.2942	24.3183	31.9507	1.647e-37	5.10701	up
gene31869	349	277	391	1200	1046	1999	2.26514	1.98047	2.5809	8.85334	7.55366	13.457	3.64697e-06	2.46266	up
gene3187	1062	975	776	2009	3408	2387	9.85718	10.2348	7.59157	21.581	35.0855	22.6853	0.000502689	1.88958	up
gene31901	1431	1308	1257	2837	3711	5591	7.3584	7.62861	6.76498	16.8728	21.0267	29.4727	6.66967e-05	2.00083	up
gene31912	82	91	88	8348	11722	7444	0.671719	0.845346	0.770882	78.9339	106.278	62.2422	2.85837e-25	7.13581	up
gene31921	39	5	10	4216	5905	7806	0.464753	0.054951	0.12146	58.6204	78.7043	96.0679	2.35835e-39	8.83694	up
gene31930	186	275	371	28	33	42	1.7418	2.91428	3.66209	0.303845	0.337418	0.395661	3.53038e-05	-2.61867	down
gene31964	0	3	0	61	101	151	0	0.027	0	0.560723	0.899354	1.23817	4.41453e-11	6.97622	up
gene32005	553	726	637	989	1620	1641	16.6311	24.6581	19.3176	33.9432	52.6401	51.1957	0.000214066	1.54617	up
gene32028	531	367	583	869	1276	1151	4.65403	3.61438	5.37885	8.88931	12.3875	10.4823	5.74746e-05	1.5801	up
gene32035	654	504	584	1446	3136	1862	3.11706	3.04184	3.59002	8.40329	18.6481	10.3198	0.00866927	2.31885	up
gene3208	491	343	309	55	50	85	4.25128	3.54691	2.81011	0.49567	0.431647	0.765075	0.000113218	-2.18422	down
gene32104	24	31	60	158	117	91	0.170123	0.336261	0.474815	1.38377	1.27726	0.818445	0.00517748	2.088	up
gene32129	41	44	17	1001	1074	2288	0.207463	0.253398	0.08826	7.4519	7.57663	15.1595	1.17655e-08	5.79224	up
gene32143	28	40	31	103	122	80	0.395244	0.634866	0.457056	1.69219	1.91923	1.15575	0.00959832	2.02723	up
gene32155	617	489	474	10	6	22	7.25362	6.49844	5.87579	0.131777	0.076526	0.263869	1.845e-18	-4.99539	down
gene32193	1406	1179	1452	1793	3054	2848	12.2507	10.6295	15.1942	14.6046	33.6518	20.6915	0.00156526	1.34754	up
gene32201	851	841	694	2993	1907	1708	4.486	4.91108	4.87254	17.867	14.9088	9.47352	0.000552465	1.87894	up
gene32210	115	234	215	26	12	19	0.689803	1.60658	1.35822	0.180792	0.074341	0.114062	0.000194539	-2.92755	down
gene32224	316	284	236	674	802	741	2.0473	2.07575	1.6102	5.68327	5.74268	4.91141	9.05475e-06	1.81827	up
gene32247	1033	754	1215	1422	1761	2010	9.86404	8.44441	13.8741	16.4813	21.4965	22.9439	0.00273941	1.20882	up
gene32251	189	187	235	375	601	492	1.0727	2.38247	1.63824	2.64645	8.58257	6.25094	0.000331135	1.68076	up
gene32262	531	363	345	1270	1091	1197	12.5443	9.69866	8.59185	34.7273	28.5829	28.9625	3.07604e-07	1.93982	up
gene32265	66	48	69	741	1575	541	0.323137	0.270867	0.355698	4.37122	8.90758	2.82294	0.00315082	4.41242	up
gene32267	310	341	271	491	578	610	2.81751	3.51539	2.60292	5.15771	5.82684	5.69916	0.00613995	1.26509	up
gene32276	434	568	611	946	981	1326	1.94979	3.22549	3.29492	5.4086	5.60696	6.837	0.000313674	1.40497	up
gene3228	0	0	0	178	263	80	0	0	0	2.50966	3.03681	0.904052	2.93388e-08	Inf	up
gene32301	1483	1192	1201	1931	2594	2459	17.2355	15.3971	14.8082	26.1262	33.8196	29.6945	0.00162821	1.2655	up
gene32320	822	637	749	1173	1742	1824	7.83482	6.86935	7.52689	12.9456	18.4217	17.7685	7.3771e-05	1.51746	up
gene32340	994	747	1385	1424	1746	2692	8.47076	6.91567	10.452	13.9796	16.3949	20.4452	0.00721717	1.31697	up
gene32349	10	14	14	352	722	1037	0.047379	0.166161	0.150134	4.17838	8.8123	11.402	9.27404e-09	6.18144	up
gene32363	175	260	228	24	15	30	0.927067	1.56239	1.27888	0.144284	0.083611	0.158902	2.1013e-05	-2.88629	down
gene32371	279	179	172	676	1189	1040	2.78565	2.04085	1.82273	8.53212	13.9045	10.8055	4.89682e-07	2.63046	up
gene32376	507	412	552	969	1272	1885	5.72874	5.26178	6.4625	12.8538	15.6526	21.5701	9.22909e-05	1.89336	up
gene32389	338	493	408	1024	799	841	2.02178	3.34072	2.57908	7.10044	5.30841	5.16152	0.000164827	1.49762	up
gene32447	1737	1185	1556	4290	4971	7745	10.309	9.12106	11.4993	34.5004	38.9615	48.9438	4.49493e-07	2.33456	up
gene32463	794	690	649	922	1773	1678	3.12917	3.06336	2.6628	6.12789	11.5497	9.706	0.00732758	1.44818	up
gene32467	67	118	95	331	261	174	0.148345	0.295736	0.222279	0.854702	0.645138	0.395376	0.0015982	1.84955	up
gene32601	432	454	417	1734	1625	2313	3.32383	3.77463	3.23822	15.9545	15.0285	19.3341	3.69251e-12	2.51799	up
gene32619	148	221	82	1047	1067	886	1.4253	2.4209	0.992402	10.064	9.30724	9.35147	8.3699e-16	3.12038	up
gene32668	86	74	44	166	238	193	2.41269	2.29292	1.17468	4.82893	6.83777	4.9334	0.00223632	1.96239	up
gene32677	420	281	390	564	724	732	8.55475	6.47781	8.37809	13.2905	16.3625	15.2685	0.00304076	1.31146	up
gene32696	126	60	97	181	348	350	1.45709	0.778033	1.18358	2.43452	4.48506	4.16296	0.000480458	2.06842	up
gene32697	493	554	378	1236	4758	4568	5.33525	6.71469	4.27496	15.8125	55.5978	49.4987	0.00827696	3.28899	up
gene32716	11	7	3	139	148	327	0.125052	0.070389	0.021875	2.02331	2.51399	5.00556	1.01463e-06	5.26529	up
gene32774	443	229	365	899	513	845	9.23195	5.40105	8.01677	21.7403	11.8857	18.0499	0.000213095	1.5434	up
gene32782	518	452	478	1052	1198	1104	8.64029	10.4469	9.68615	23.9047	27.9156	21.1684	2.67152e-05	1.62663	up
gene32817	284	247	312	413	627	741	4.38607	4.31869	5.08878	7.39228	10.7605	11.7417	0.000774848	1.48831	up
gene32835	821	823	683	2132	4819	4732	13.0911	14.8457	11.4845	39.361	85.2656	77.3132	0.000255793	2.73292	up
gene32844	388	238	333	1616	4939	3836	5.07305	3.51407	4.59107	24.4613	71.669	51.3971	0.00055588	3.87041	up
gene32877	375	68	76	453	814	916	2.90229	0.595919	0.618193	4.06227	6.99729	7.27761	0.000167798	2.53214	up
gene32878	2746	2943	2487	4591	7016	7113	14.4362	16.8412	15.6991	28.5461	37.2446	33.2582	0.000112059	1.59773	up
gene32881	577	561	623	1855	2321	2819	6.24315	6.35032	6.88024	23.0157	27.4735	30.1573	4.87111e-11	2.39411	up
gene32882	576	599	745	1502	1663	2007	4.4779	5.48309	6.06768	13.6121	15.3909	16.687	6.85968e-07	1.83392	up
gene32887	598	310	231	564	875	1014	2.39588	1.10365	0.76664	2.05173	3.06979	3.41532	0.00204215	1.53056	up
gene32889	1403	1121	1352	502	375	361	9.22081	8.42061	9.36571	3.81399	2.72958	2.43902	0.00281079	-1.22822	down
gene32894	215	159	56	449	480	858	3.72153	3.09933	1.01626	8.99627	9.20931	15.2137	5.92718e-05	2.44958	up
gene32895	359	360	400	1362	2459	2695	4.59809	5.1957	5.39089	20.1348	34.8409	35.261	4.27542e-07	2.94726	up
gene32912	432	379	414	4397	5793	7259	3.2266	3.21285	4.54169	60.2319	64.0361	93.9633	3.46366e-24	4.23831	up
gene32916	288	152	120	8580	10064	16753	3.39998	5.8589	1.49373	225.494	123.976	267.925	7.12345e-19	6.3954	up
gene32917	13	6	8	217	299	475	0.193503	0.099101	0.122591	4.03803	5.31769	7.78301	3.36871e-12	5.61832	up
gene32935	14	9	3	64	33	65	0.085604	0.057208	0.017047	0.455099	0.222704	0.40995	0.000337063	3.04215	up
gene33008	890	780	639	1333	1212	1476	7.94487	7.98187	5.97743	14.227	13.6436	13.222	0.00264337	1.20543	up
gene33012	313	213	330	847	710	1006	5.45041	3.74916	6.10849	17.2165	13.5611	18.0951	4.54806e-07	1.99725	up
gene33031	255	324	176	592	754	763	3.28847	4.98671	2.0417	9.31764	11.7451	10.6165	4.82854e-06	1.87369	up
gene33106	1949	1604	1789	5477	6983	8557	15.2116	19.0854	12.2525	54.8378	76.9914	51.8789	2.13426e-09	2.38508	up
gene33182	836	644	363	3228	6398	5297	5.28652	5.61264	2.64784	21.3041	43.6775	29.636	3.97497e-07	3.43402	up
gene33199	52	157	93	224	261	270	0.316134	1.08386	0.596044	1.58046	1.76692	1.68803	0.00386803	1.68939	up
gene33201	424	389	377	653	957	1124	4.17688	4.33055	3.91811	7.44771	10.4589	11.3476	5.03805e-05	1.605	up
gene33221	101	136	93	238	327	246	0.537696	0.821141	0.523799	1.47381	1.94007	1.3469	0.00351051	1.69792	up
gene33222	145	146	115	308	423	621	1.44763	1.5755	1.14315	3.42836	4.40294	6.48596	5.07807e-05	2.12854	up
gene33223	1011	841	815	1145	1506	2022	17.6604	16.4753	14.584	22.6385	31.6322	41.018	0.00226055	1.21357	up
gene33294	15	83	18	167	87	213	0.227551	1.49258	0.300438	3.07852	1.52753	3.47213	0.00226423	2.32413	up
gene33295	603	651	348	2258	1409	2649	2.99571	3.65944	1.82125	12.9802	7.76515	13.4767	7.39537e-08	2.36271	up
gene33309	264	294	367	625	444	667	1.66983	2.16765	2.48681	4.71679	3.24524	4.46167	0.00391123	1.30662	up
gene33320	1585	1496	1258	1755	2683	3246	7.3799	7.92195	6.21836	9.20444	13.7116	15.2968	0.00334622	1.22596	up
gene33354	882	636	888	1460	1131	1715	8.49008	6.93246	8.93141	15.9074	11.9922	16.8986	0.00164829	1.2508	up
gene33382	467	551	673	95	95	122	4.54634	6.0744	6.91385	1.06138	1.02714	1.21763	3.16011e-05	-2.03898	down
gene33448	676	461	498	4993	3467	6166	3.84156	2.96243	2.98682	32.8619	21.8701	35.9179	2.74704e-17	3.56823	up
gene33475	280	320	270	41	87	67	1.11986	1.68992	1.34652	0.167443	0.364541	0.243968	0.00562872	-1.74915	down
gene33480	796	766	720	975	1316	1820	6.26709	7.61425	5.97837	9.99091	13.6187	18.2188	0.00236893	1.24758	up
gene33494	1580	1256	1505	2149	2531	2658	10.6656	9.59291	10.7187	16.7942	18.9576	18.3817	0.00442913	1.17273	up
gene33510	1393	1397	1313	12502	13275	21159	8.83069	10.0214	8.77922	91.7319	93.3593	137.407	9.65639e-16	3.9098	up
gene33541	767	596	688	4508	7171	5818	3.2318	2.6957	2.9917	19.2361	29.2065	20.7069	6.568e-13	3.51529	up
gene33582	2219	2357	2457	3484	4969	3644	7.24123	8.71616	8.4561	15.6088	17.9827	14.0301	0.00529964	1.19702	up
gene33586	389	353	355	26	46	49	4.04188	4.14356	3.88229	0.291517	0.528509	0.511203	1.29518e-06	-2.77223	down
gene33587	397	262	368	563	502	728	8.18306	6.10912	7.99462	13.4355	11.4724	15.3798	0.0082746	1.21822	up
gene33588	720	633	547	1146	1688	1437	4.29137	4.26846	3.43046	7.83537	11.096	8.73307	3.36292e-05	1.58303	up
gene33613	7	26	18	124	143	169	0.019764	0.081079	0.052377	0.418743	0.448443	0.497024	6.3458e-07	3.45926	up
gene33651	7	18	2	35	62	93	0.330159	0.945604	0.099697	1.94613	3.31128	4.6547	0.000315446	3.15117	up
gene33662	553	320	458	1505	2096	1793	1.89331	1.23799	1.65461	5.96504	7.9667	6.29353	2.94871e-11	2.45073	up
gene33677	109	144	208	3905	6376	8340	0.769956	1.10377	1.57206	32.365	50.8326	61.3703	1.84823e-15	5.73314	up
gene33686	216	260	335	646	1191	1272	2.66303	6.28878	4.40415	9.27319	16.5536	16.1694	3.63326e-05	2.34209	up
gene33708	1225	1141	1034	1645	2291	1706	8.33534	8.79716	7.42042	12.9482	17.2961	11.8896	0.00529184	1.14725	up
gene33718	9	3	6	39	113	89	0.062633	0.017715	0.046974	0.347513	0.960336	0.698551	0.000210811	4.19444	up
gene33763	139	70	88	258	371	328	0.387652	0.865441	0.311161	1.18369	1.44676	1.20304	0.000101357	2.12277	up
gene33764	454	566	528	885	739	1034	2.74439	3.87081	2.73061	6.45799	5.0677	6.59534	0.00481776	1.17195	up
gene33765	561	539	463	810	1297	1305	5.14161	5.58721	4.47384	8.59258	13.1918	12.2614	7.8755e-05	1.53285	up
gene33783	1222	1055	1200	1792	2008	1711	10.1012	10.1514	10.7615	17.5531	18.8096	14.8671	0.00976087	1.08243	up
gene33833	1535	1177	1197	1977	2238	2435	14.3456	12.6333	11.5845	21.3682	23.502	23.3471	0.00380937	1.18067	up
gene33839	526	550	448	720	965	975	2.37182	2.79405	2.09653	3.71394	4.79666	4.48306	0.00390472	1.20685	up
gene33848	422	381	389	572	869	645	4.1158	4.27806	4.00105	6.48349	8.45346	4.94712	0.00582191	1.22638	up
gene33873	858	920	896	6408	15778	11221	4.08897	5.87619	4.94756	38.1729	90.0137	59.4551	2.60562e-05	4.05774	up
gene33893	362	544	492	39	69	75	1.78417	3.03269	2.55464	0.217775	0.375514	0.376001	1.30069e-06	-2.54222	down
gene339	371	255	323	1532	2041	3388	2.64117	2.27338	2.00159	12.5713	16.5207	25.8657	3.3876e-06	3.28117	up
gene33981	202	120	136	24	17	15	1.34665	0.905586	0.955685	0.184061	0.119697	0.096889	0.000463322	-2.60251	down
gene34020	11	25	23	95	87	118	0.030802	0.079943	0.071966	0.337784	0.293709	0.369879	0.000304789	2.72325	up
gene34055	37	64	35	9	5	4	0.241716	0.481304	0.241924	0.062555	0.030003	0.026894	0.00687721	-2.52997	down
gene34078	1519	1391	1327	1643	2733	2503	7.6317	8.15933	7.02809	9.60478	15.3041	12.9388	0.00760543	1.11114	up
gene34157	9	13	15	4281	3443	6901	0.115604	0.173685	0.194307	66.1372	50.8998	94.303	2.94983e-29	9.00842	up
gene34185	352	387	332	55	89	106	2.90386	3.61676	2.89111	0.520947	0.814731	0.890006	0.00410796	-1.70193	down
gene34209	112	80	104	14	8	27	1.27809	1.02735	1.25399	0.172485	0.10101	0.307207	0.00974608	-2.20372	down
gene34223	47	30	20	324	233	285	0.39161	0.215531	0.106957	3.58265	3.21188	2.82533	1.17487e-09	3.5339	up
gene34242	1673	1020	1374	285	508	399	12.2443	6.07618	10.7343	2.3868	4.45212	3.12748	0.000724963	-1.33833	down
gene34262	49	91	144	742	788	1027	0.324293	0.628602	1.01772	5.34899	5.4962	7.58425	2.82509e-18	3.5643	up
gene34263	33	33	44	717	579	898	0.37082	0.410934	0.510898	9.32804	7.21376	10.3285	1.84817e-25	4.71858	up
gene34299	453	268	337	601	832	1175	3.11219	1.6632	1.95378	3.82814	5.07945	7.84772	0.000374604	1.71744	up
gene34314	1222	546	1113	4089	3088	5488	6.375	3.08858	5.52696	23.0067	18.5903	26.9097	2.3373e-10	2.55889	up
gene34363	141	137	170	3518	6716	6147	1.38828	1.52415	1.78408	40.4947	74.0067	62.6935	3.14287e-15	5.60558	up
gene34365	935	750	825	1262	1162	1772	8.64982	7.85583	8.0538	13.5171	11.9273	16.7957	0.00463991	1.14594	up
gene34366	1338	1061	1127	2473	5263	4746	3.39972	2.84943	2.93791	7.07844	13.8308	11.9741	0.000737721	2.24173	up
gene34377	83	93	71	201	277	290	0.976692	1.23898	0.884483	2.74464	3.61792	3.50014	0.000458118	2.03573	up
gene34398	936	673	543	140	115	94	5.56836	4.52941	3.40465	0.95914	0.757238	0.567999	8.02303e-07	-2.20225	down
gene34403	45	46	71	1280	7211	3107	0.681718	0.781332	1.0556	22.4311	121.188	48.2206	0.00465155	6.59958	up
gene34409	14	5	12	46	123	124	0.710603	0.289265	0.599618	2.73885	7.02599	6.51985	0.000213607	3.6824	up
gene34436	313	245	260	843	1075	1112	3.79617	3.34859	3.31932	11.5061	14.4991	13.8566	2.0208e-09	2.30413	up
gene34470	332	309	314	54	60	101	4.39939	4.16978	3.73235	0.718368	0.573933	0.901074	0.00454177	-1.7559	down
gene34549	257	240	228	647	832	949	2.16427	2.28249	2.02037	6.30615	7.77586	8.18863	6.7762e-08	2.14907	up
gene34560	1	19	7	60	39	40	0.005115	0.87109	0.16604	1.90961	1.09941	1.17416	0.00145674	2.69646	up
gene34561	96	142	80	279	282	383	1.88129	3.01022	1.54426	6.40021	5.8842	7.89121	0.000270027	1.94896	up
gene34566	194	407	156	1274	1684	1654	2.25563	6.10523	1.86202	14.3968	23.1928	20.0988	3.80319e-16	2.97738	up
gene34569	421	294	291	902	884	1346	2.75112	2.17132	2.00661	6.82595	6.41329	9.08676	8.13972e-08	2.04646	up
gene34578	80	193	90	738	1593	836	0.666497	2.77644	0.699041	10.7333	21.4032	10.5732	0.000691845	3.51157	up
gene34606	336	708	321	1009	737	1436	7.10869	17.4955	7.3391	26.4598	17.0245	31.4775	0.00312215	1.57706	up
gene34607	644	580	863	175	127	257	3.90426	4.46228	5.88893	1.71066	0.795388	1.86018	0.00134612	-1.50252	down
gene34614	342	245	203	64	52	51	3.12882	2.95558	1.65393	0.58381	0.523425	0.548452	0.00498674	-1.82378	down
gene34656	476	248	311	796	889	1253	6.5968	3.88035	4.53282	12.9038	13.815	17.7951	7.15578e-07	1.92603	up
gene34674	224	311	97	1019	1021	2017	1.99258	2.95906	1.63521	9.87884	12.2945	22.1678	1.79049e-05	3.04613	up
gene34724	263	155	174	44	21	50	2.23356	0.896539	0.896967	0.30894	0.110723	0.329039	0.00635938	-1.95664	down
gene34730	376	424	433	41	118	59	5.21881	6.17042	5.50668	0.579541	1.91255	1.19106	0.000129457	-2.07595	down
gene34746	813	655	751	1117	1464	1345	6.35236	5.66543	4.52651	10.0274	9.53934	10.8747	0.0021234	1.24121	up
gene34753	1168	749	1178	1524	1675	1848	10.4328	7.56044	11.099	15.7526	16.5884	16.9053	0.00645626	1.12832	up
gene34754	444	352	261	1316	1608	2092	2.5822	2.31953	1.60328	8.95482	10.5069	12.5273	4.01517e-13	2.65153	up
gene34762	1086	1363	1312	2126	2669	2373	4.54329	5.0426	3.45279	11.9638	13.9635	11.2813	0.00066824	1.33399	up
gene34783	752	1551	1721	2432	1823	2549	11.5544	26.2667	27.5473	42.9507	29.705	39.1719	0.00427933	1.14119	up
gene34910	1392	672	1151	1532	1800	1744	9.74363	8.69946	12.0125	13.3744	17.1123	19.5905	0.00995126	1.09381	up
gene34944	308	201	243	603	559	669	2.05214	1.40012	1.6284	4.71861	3.81142	4.61763	9.39793e-05	1.70249	up
gene34955	50	80	101	7	3	3	0.668498	1.23049	1.45032	0.095547	0.030628	0.028281	2.01064e-05	-3.7503	down
gene3496	2977	2782	3480	673	461	994	20.6516	20.0067	24.4464	5.82384	3.9336	8.17822	5.4987e-06	-1.7247	down
gene3497	3052	2811	3011	302	275	469	18.9803	20.2229	19.9812	1.81843	1.61819	2.48152	2.30892e-13	-2.68782	down
gene34972	3555	3430	5638	9549	7985	5563	71.9895	79.2725	120.381	225.233	177.815	115.799	0.00860615	1.29554	up
gene34982	158	212	144	7386	8131	11586	1.03553	1.56904	1.0455	56.4986	59.7433	78.6184	2.0245e-42	6.10389	up
gene34987	1277	956	1166	21340	38663	48271	8.98729	7.61027	8.6615	173.91	302.005	348.168	2.65046e-12	5.40463	up
gene35	1439	838	1112	11400	8437	16625	13.7695	9.41346	7.79972	152.106	109.989	167.777	4.94596e-12	3.83768	up
gene35023	492	415	407	23	14	31	3.76767	3.58611	3.27411	0.197307	0.115018	0.238522	7.56801e-12	-3.87808	down
gene35024	565	431	443	24	20	34	8.25086	7.12319	6.8147	0.394497	0.308667	0.502836	3.59022e-12	-3.80237	down
gene35061	486	394	444	1597	1982	2310	2.58206	2.24992	2.48252	10.2763	12.2006	13.2228	2.03225e-12	2.56421	up
gene35116	677	240	356	817	1236	1223	4.49989	1.8398	2.54501	6.41424	9.29885	8.49927	1.63398e-05	1.80676	up
gene35151	2267	2304	1719	3074	3201	4692	7.51823	8.62759	5.99976	11.434	11.7623	16.1685	0.00383495	1.19533	up
gene35203	244	180	249	26	20	50	1.86173	1.55253	2.00228	0.223203	0.165692	0.389102	0.000354843	-2.41322	down
gene35229	768	641	604	1378	2086	1506	5.07719	4.81147	4.91416	9.98034	14.4644	10.735	7.49271e-05	1.72537	up
gene35239	1952	1156	1823	23674	41721	34773	7.77764	5.11944	7.40167	44.9958	72.8242	58.9044	1.19888e-14	4.77684	up
gene35257	185	164	242	524	686	884	1.75321	1.74145	2.4405	5.80587	7.1334	8.79016	6.71067e-08	2.23335	up
gene35260	2076	1919	2161	12257	16237	16950	32.4679	33.99	35.6279	222.176	282.208	272.182	1.08866e-13	3.29412	up
gene35289	429	409	363	511	925	999	4.04078	4.3507	3.70814	5.56362	10.3254	9.63017	0.00536914	1.42451	up
gene35300	1581	1598	1810	3123	4250	3916	10.1103	11.6794	12.2683	23.4508	30.3013	26.3125	5.39808e-05	1.58911	up
gene35303	1143	1073	1223	91	108	150	5.34779	5.67954	6.03862	0.491201	0.55776	0.71478	4.85299e-13	-2.89892	down
gene35322	887	792	633	14015	16357	24899	7.92266	8.00316	5.96313	144.923	162.115	227.867	4.40533e-20	4.97619	up
gene35355	2291	1734	2804	15220	37437	20510	14.8334	12.8434	18.6931	107.635	276.898	133.133	0.000745167	3.85916	up
gene35357	1353	1199	1379	2388	3498	2951	10.2076	10.3013	10.956	21.7317	29.1913	26.0884	4.30541e-05	1.58611	up
gene35358	346	360	373	718	1283	1154	2.51491	2.97434	2.90268	6.13161	11.1612	8.7455	7.305e-05	1.95742	up
gene35367	1046	1083	868	1297	2150	1906	4.24212	4.95641	3.70063	6.07135	9.71835	7.9027	0.00289872	1.24375	up
gene35376	1067	822	982	2235	5172	3967	3.70697	3.19653	3.70782	9.24438	19.5269	14.4912	0.00228538	2.41094	up
gene35380	4068	3246	3590	6500	7119	8272	26.8348	24.3988	24.5102	49.9061	52.4066	47.9935	0.00123075	1.41732	up
gene35501	5595	5306	2883	47684	102968	98619	24.4397	26.2208	13.2839	241.032	498.868	441.189	7.60896e-09	4.58028	up
gene35503	922	1588	574	2247	1592	2334	11.4699	22.357	7.53038	32.3709	21.9842	32.7186	0.000625501	1.36862	up
gene35530	159	167	208	456	745	843	0.576729	0.686662	0.842521	2.41817	3.925	4.55823	1.01875e-06	2.3414	up
gene35553	51	35	35	3	4	4	0.293775	0.196609	0.187921	0.018953	0.021313	0.031311	0.0010876	-3.03969	down
gene35557	2470	1469	1630	12008	27679	15434	34.3069	23.0821	23.8819	193.043	426.496	219.59	0.000426366	3.74861	up
gene35622	257	214	266	18	31	35	1.12214	0.979507	1.22279	0.079962	0.13178	0.143726	2.94936e-05	-2.72177	down
gene35640	769	466	559	1309	866	1018	4.20028	3.9822	3.49594	8.96317	6.52282	6.17223	0.00228114	1.25431	up
gene35669	576	1605	900	1569	2617	2743	2.84145	9.67155	5.00638	9.14153	14.7948	14.3134	0.00512013	1.5363	up
gene35691	1889	1005	1809	2574	2430	2847	13.8815	9.0732	14.1366	23.3081	21.6893	21.5287	0.00539142	1.16704	up
gene35704	217	181	113	873	1707	2296	1.38918	1.27533	0.767088	6.47373	12.0482	15.0486	1.19611e-05	3.65349	up
gene35728	262	152	332	4134	4920	3224	5.36539	3.65628	7.60292	84.6749	95.946	59.4773	4.03759e-18	4.48182	up
gene35729	23	35	23	269	506	399	0.521257	0.88454	0.534965	7.10089	12.8362	9.33902	5.48698e-10	4.2524	up
gene35761	431	220	373	72	78	86	9.71565	5.92867	10.4251	1.84074	2.07599	2.31151	0.00465155	-1.68745	down
gene3577	930	857	827	1141	1763	2187	5.41917	5.67293	4.94483	7.78867	11.718	13.14	0.00186881	1.36465	up
gene35821	1122	730	291	1171	2181	1827	9.41903	6.92726	2.5738	11.3706	20.3084	15.7138	0.00673667	1.69468	up
gene35872	938	339	734	3320	5830	5999	8.98979	2.95701	7.28728	26.544	58.2501	50.4736	2.87237e-09	3.35459	up
gene35921	247	215	230	710	1124	955	1.59627	1.59134	1.58145	5.37582	8.15055	6.31294	1.03876e-08	2.4279	up
gene36065	35	33	34	3	3	7	0.151242	0.695545	0.152995	0.010278	0.009851	0.029261	0.00705271	-2.58609	down
gene36098	1446	1620	1418	2265	3449	2912	5.81257	7.03775	5.93326	10.7304	15.7613	11.8965	0.000671119	1.35079	up
gene36106	839	669	434	1913	3005	2414	8.09498	6.66045	4.24676	17.4508	26.0482	21.5979	1.52806e-07	2.33376	up
gene36169	58	67	45	3	0	7	0.507257	0.935237	0.416619	0.029078	0	0.054891	6.11882e-05	-3.74323	down
gene3621	281	374	223	45	51	36	1.88192	2.83733	1.57563	0.343407	0.374452	0.242608	0.00014262	-2.3331	down
gene36222	122	90	114	1846	2676	1972	2.21667	1.85094	2.19362	39.0488	54.2828	36.923	2.92592e-20	4.74373	up
gene36223	863	650	720	2980	2915	3886	16.5314	14.0692	14.5412	66.0533	61.9254	76.2169	6.31694e-12	2.54122	up
gene36269	204	254	212	417	512	711	3.3963	4.80362	3.73925	8.05372	9.49566	12.1749	0.000149467	1.68045	up
gene36305	1856	1374	1503	2823	4038	4159	19.9785	16.7135	17.0091	35.1726	48.1624	45.8626	2.94936e-05	1.63626	up
gene36329	2491	4043	3548	4738	9332	9485	15.2237	27.8762	22.8116	33.3704	63.0565	59.1506	0.00674016	1.61477	up
gene36346	139	143	199	338	507	327	0.792364	0.872731	1.12373	2.31939	3.31032	1.97293	0.000920387	1.70757	up
gene36349	402	396	408	949	663	1093	3.61741	5.24366	4.75118	11.9824	5.77131	12.5424	7.78926e-05	1.56229	up
gene36357	1424	1221	1342	498	374	397	7.13906	6.96039	7.12711	2.83934	2.06141	2.09224	0.00255308	-1.23871	down
gene36401	1087	1680	1531	1833	2482	3309	8.60483	14.3628	11.5863	16.6578	21.1502	25.2967	0.0040321	1.21197	up
gene36446	59	91	106	308	283	509	0.455731	0.800284	0.867928	2.76397	2.43255	4.04689	1.00648e-06	2.4859	up
gene36461	176	194	173	22	23	33	1.84262	2.293	1.90492	0.254944	0.255662	0.343885	0.000809805	-2.40603	down
gene36486	633	381	579	756	935	1066	1.53911	1.04817	1.48611	2.12518	2.52177	2.65721	0.0040964	1.21456	up
gene36501	867	1021	780	166	170	286	13.6784	18.2248	12.9857	3.02049	2.9653	4.61087	6.31066e-05	-1.7161	down
gene36503	607	1029	915	165	179	319	4.32585	8.29958	6.88291	1.35957	1.4117	2.32619	0.00692057	-1.56952	down
gene36539	8	38	19	256	1382	1355	0.097479	0.576701	0.261629	4.0287	20.8888	18.9027	0.000282708	5.87933	up
gene36547	128	118	154	306	979	1137	1.60029	1.7112	2.09054	4.49447	13.9295	15.1048	0.00805702	3.00515	up
gene36548	1183	837	981	2259	4719	3883	13.0937	10.4761	11.4541	28.9345	57.9407	44.0238	0.000622765	2.28088	up
gene36551	1005	943	1002	11767	20811	20148	7.3594	7.66527	7.83682	99.9671	169.013	149.638	2.13323e-14	4.57046	up
gene36559	1909	1828	2074	3098	6483	5953	8.87677	9.12435	9.79781	17.7838	34.7661	24.3752	0.00356562	1.83091	up
gene36577	36	74	64	95	194	225	0.20106	1.11918	0.374122	0.618629	1.20231	1.29094	0.005411	1.94283	up
gene36580	1224	653	947	2077	3761	3099	6.69616	4.02071	5.47139	13.099	22.934	17.2813	0.000110316	2.09747	up
gene366	351	334	330	580	770	979	2.51678	3.00552	2.62423	5.3064	5.7446	8.1155	8.50833e-05	1.60014	up
gene36613	51	66	50	6	3	14	0.419003	0.61294	0.43391	0.048362	0.018517	0.111135	0.00709741	-2.5011	down
gene36614	27	21	23	181	256	357	0.214428	0.189816	0.200982	1.82989	2.40921	3.11391	9.01579e-11	3.8896	up
gene36638	2761	2363	2976	3348	4399	5745	5.71423	4.36896	6.35519	5.7755	9.29715	10.2814	0.00862985	1.14319	up
gene36685	389	357	340	2080	1141	2934	3.32864	3.51873	2.91376	21.4391	12.4256	25.9554	8.50833e-05	2.89072	up
gene36690	6274	5637	4113	10753	14297	13009	43.2	43.943	29.3081	84.4687	107.711	90.4813	0.000351736	1.6583	up
gene36706	309	361	308	806	1032	930	2.44045	3.2214	2.56301	7.3674	9.04216	7.52224	9.84309e-07	1.90448	up
gene36710	196	187	206	41	17	42	1.21891	1.31374	1.35196	0.291686	0.111594	0.262768	0.00230318	-2.16608	down
gene36721	458	295	419	1000	553	969	6.10781	4.44142	5.89666	15.4387	8.17355	13.2396	0.00028021	1.51839	up
gene36730	208	240	276	1675	1032	1472	1.24018	1.61624	1.73088	11.558	6.82554	8.98833	4.37844e-15	2.9274	up
gene36746	70	82	79	6	0	11	0.55918	0.735181	0.664943	0.046905	0	0.083025	0.000106742	-3.41112	down
gene36769	63	70	33	126	181	199	0.571603	0.937077	0.378097	1.43821	2.49944	2.62583	0.00281817	2.00053	up
gene36775	62	74	66	265	347	328	0.477693	0.646249	0.533445	2.3786	3.3521	2.87798	1.30439e-06	2.62048	up
gene36825	169	187	194	490	636	622	1.328	1.66265	1.61356	4.47241	5.5634	5.02194	1.82511e-06	2.07382	up
gene36855	3554	2670	2560	5737	8403	9710	59.4805	50.3565	48.3535	110.805	182.576	165.736	9.38707e-06	1.85298	up
gene36856	399	369	271	424	761	791	25.5176	26.4451	16.9823	31.9879	54.204	48.1837	0.00846401	1.33246	up
gene36960	84	52	65	0	1	20	0.692685	0.478053	0.556109	0	0.006715	0.165329	0.0012151	-2.90638	down
gene37055	42	50	38	160	327	527	0.768851	1.0296	0.720417	3.36386	6.56732	9.88434	0.00162757	3.34602	up
gene37059	45	40	27	260	179	154	0.845562	0.880339	0.558454	6.35624	3.6179	3.01663	8.70672e-06	2.81637	up
gene37061	91	18	119	457	426	557	0.855477	0.209129	1.3959	5.75359	5.15094	5.79797	1.13569e-10	3.10651	up
gene37146	48	102	70	177	220	157	0.341299	0.818281	0.522972	1.45594	1.7442	1.14224	0.00921177	1.72109	up
gene37148	90	118	100	2060	3309	1892	0.784787	1.16403	0.897322	20.7389	33.6459	19.0929	3.53119e-10	4.97092	up
gene37155	171	78	101	6	2	7	0.629002	0.324845	0.390408	0.021642	0.00416	0.023046	6.69687e-07	-4.13402	down
gene37180	136	145	156	322	742	513	1.24521	1.50807	1.57174	3.45238	7.67891	4.97001	0.0062946	2.26839	up
gene37185	312	287	332	1090	1999	1398	2.46188	2.6123	2.82124	6.40139	11.1202	11.2973	2.75243e-05	2.69051	up
gene37233	932	717	864	279	198	160	4.45047	3.86515	4.43566	1.53352	1.04387	0.779711	0.00029833	-1.55666	down
gene37234	649	529	594	217	103	119	6.70114	6.17038	6.55294	2.62661	1.19969	1.27809	0.00100443	-1.59896	down
gene37257	584	543	573	3335	2711	4181	2.93594	3.18142	3.14017	20.1598	16.4413	22.3009	6.62009e-16	2.98868	up
gene37273	0	0	0	321	539	634	0	0	0	2.32234	3.73083	4.03443	4.88723e-29	Inf	up
gene37278	1810	1793	1700	4569	5628	6559	16.3713	19.8984	18.0367	53.437	63.5888	68.3329	1.36183e-07	2.06274	up
gene37324	651	547	672	836	1293	1127	4.89735	5.16794	5.29785	8.25838	11.3654	10.1513	0.00313046	1.21889	up
gene37329	1690	1340	1528	2482	2698	2966	31.8597	29.5565	31.8417	51.6283	56.9695	59.1155	0.00205041	1.25158	up
gene37343	831	810	818	3915	7783	6567	5.48458	5.11592	4.83275	26.6748	49.1233	42.1272	6.55944e-07	3.3059	up
gene37357	2260	1556	1526	2912	2722	4545	10.8877	10.4687	8.11083	16.7443	14.5851	22.4053	0.000866956	1.33615	up
gene37378	347	301	347	579	586	732	3.65813	3.5837	3.86007	7.07062	6.85865	7.90301	0.0024649	1.33886	up
gene3740	297	356	311	0	55	37	2.21129	2.95306	2.5196	0	0.44096	0.152642	6.45706e-07	-2.97662	down
gene37400	511	664	490	761	1033	976	7.65255	11.2588	7.73712	13.1968	17.169	14.9814	0.0070293	1.13116	up
gene37445	474	340	259	30	21	27	2.61865	2.11847	1.49558	0.186106	0.123093	0.147794	1.06777e-08	-3.3707	down
gene37450	175	120	163	445	568	558	2.54338	1.97713	2.49315	7.49724	9.17134	8.31851	1.23346e-06	2.20093	up
gene37452	1578	1608	1605	4722	6095	5290	9.71909	14.3878	13.1014	45.0695	46.3964	44.4635	3.11812e-08	2.16012	up
gene37462	692	675	498	2367	1677	3263	4.72916	6.15498	3.91639	24.3139	13.1046	24.4038	3.51185e-07	2.35887	up
gene37463	444	466	460	892	1301	1273	2.91874	3.64883	3.19452	6.84601	9.50603	8.79081	4.5508e-06	1.74544	up
gene37470	159	146	113	617	409	632	1.98786	2.06874	1.49408	8.96428	5.69296	8.1273	7.0534e-08	2.38593	up
gene37474	120	130	96	661	672	652	0.913451	1.11504	0.768267	5.8229	5.67212	5.08537	6.62743e-12	2.92276	up
gene37485	1296	1020	1473	2037	2557	2354	24.4744	21.7889	29.3568	44.5378	53.5925	45.5504	0.00121478	1.29581	up
gene37487	650	793	672	1277	1463	1473	11.8373	16.3391	12.9118	26.9182	29.5453	27.4778	0.0002984	1.39343	up
gene37536	106	180	123	492	1636	1624	1.88448	2.83975	1.79736	8.12248	25.9793	22.2782	0.00165102	3.58245	up
gene37539	188	202	111	15	14	7	1.63884	1.98918	1.01449	0.146269	0.134887	0.054129	4.11922e-06	-3.38473	down
gene37570	1629	1547	1144	1750	2706	2583	4.59091	4.63909	3.67072	5.51443	8.1336	7.55869	0.00731786	1.11128	up
gene37578	621	614	596	1147	1243	1519	2.47243	2.76243	2.50049	5.28335	5.48958	6.19286	9.32913e-05	1.49648	up
gene37604	7	18	11	215	202	232	0.02554	0.080931	0.044888	1.27729	1.17313	1.22898	4.13965e-12	4.54171	up
gene37605	424	283	367	706	912	692	3.5053	2.64258	3.20134	6.75361	8.36579	5.86055	0.000242239	1.5349	up
gene37620	4087	3609	4169	8147	14188	16437	54.8589	44.5454	55.6237	137.203	205.463	181.157	7.45991e-05	2.11637	up
gene3763	416	377	397	525	853	682	8.88641	9.11412	8.94741	12.967	20.1986	14.9045	0.00680222	1.20894	up
gene37636	1311	1419	1260	2797	3070	2437	7.86347	5.94411	4.40073	10.3672	12.4241	10.0547	0.000167553	1.46721	up
gene37647	481	402	422	569	624	1010	3.1252	2.9491	2.88693	4.2746	4.4912	6.72063	0.00794249	1.15566	up
gene37651	189	188	140	1664	1515	1576	1.33246	1.45617	1.05939	12.0919	10.6746	10.033	8.22421e-22	3.60512	up
gene37652	3	0	1	288	291	309	0.026191	0	0.003783	4.18108	4.11508	3.97434	6.5022e-26	8.28136	up
gene37669	11253	10093	13532	4084	3619	2466	59.0444	46.764	58.5022	20.3011	18.2744	11.2117	0.0028522	-1.35437	down
gene37681	57	77	65	231	238	342	0.481693	1.0402	0.968007	3.31107	3.52341	3.31754	1.96048e-05	2.41336	up
gene37682	111	121	87	1123	2312	4054	1.20286	1.64004	1.0109	16.0243	31.2183	47.5339	9.53482e-05	4.93517	up
gene3773	94	87	76	254	221	322	1.06776	1.18049	0.914291	3.23402	2.50266	2.85088	0.000398713	2.03201	up
gene37730	887	1059	864	1877	2742	2467	13.7175	18.6705	14.7637	31.2475	51.5232	42.6047	3.26908e-06	1.73659	up
gene37771	300	333	280	3	24	27	2.12495	2.70949	2.09142	0.0164	0.180815	0.186739	4.6836e-09	-3.68349	down
gene37778	3361	2828	3452	6514	5897	7143	124.316	118.197	134.65	279.79	242.282	270.59	0.000849166	1.43087	up
gene37780	639	380	358	1257	1184	985	10.1671	6.55511	6.27946	23.4193	22.813	12.5489	6.48177e-06	1.74448	up
gene37796	1836	2042	2151	4213	4573	4076	25.3796	32.6373	32.8018	66.9981	63.7362	57.2492	0.000189008	1.50149	up
gene37803	858	470	607	1606	1174	2173	8.46002	5.91806	6.55115	16.9765	13.3743	22.2722	1.37277e-05	1.76981	up
gene37809	1510	1507	1752	6931	8498	10001	4.13182	4.72119	4.95967	21.3742	25.2898	27.0408	3.36671e-12	2.81975	up
gene37817	4	7	0	155	79	195	0.076828	0.13251	0	3.60497	1.74548	3.95341	9.07816e-11	5.62526	up
gene37840	744	531	640	902	1018	1304	6.23797	5.05415	5.63712	9.12528	8.99258	11.2954	0.00498087	1.16475	up
gene37868	19	22	25	71	111	75	0.189408	0.294986	0.263304	1.22412	1.62575	1.05639	0.00303327	2.37678	up
gene37870	533	434	366	1386	2034	3099	3.96391	3.61071	2.72553	12.3783	16.5175	23.9911	3.7802e-05	2.68957	up
gene37888	73	86	105	554	646	679	0.423377	0.562151	0.642314	3.86905	4.18867	4.85587	1.5962e-13	3.23581	up
gene37910	74	72	68	8987	10508	12810	0.929569	1.11179	0.967714	139.228	154.786	176.552	1.33611e-54	7.64032	up
gene37923	300	346	307	35	86	88	1.11992	1.44788	1.19514	0.146256	0.350378	0.329854	0.00351457	-1.78898	down
gene37925	885	699	1076	2153	1539	1266	3.06713	2.80693	4.09166	8.66104	5.90675	4.65432	0.0050996	1.32298	up
gene37928	152	178	202	403	525	878	0.649444	0.854526	1.05946	2.02839	2.60684	4.50948	0.000691845	2.15271	up
gene37961	162	221	135	762	776	1767	1.82716	2.76352	1.6684	10.5333	10.1978	22.0824	0.00119094	3.04143	up
gene37974	93	70	153	1762	1597	2464	0.403162	0.37311	1.17049	9.77377	11.2827	15.1427	1.25402e-32	4.61669	up
gene38001	3234	2799	2606	638	547	1158	8.34165	8.16535	7.08823	1.85411	1.52105	2.99251	0.000128567	-1.49103	down
gene38009	1449	1225	1099	1724	2114	2668	3.16709	3.03673	2.53425	4.52221	5.13565	5.99266	0.00305711	1.1913	up
gene38034	969	825	717	2998	6908	8148	10.7297	10.4347	6.31453	37.9836	81.6928	79.8031	0.000161854	3.25114	up
gene38035	650	618	587	885	1209	1188	7.17869	7.7199	6.84132	11.3123	14.814	13.4458	0.00245529	1.23209	up
gene38038	564	698	480	55	46	92	7.40742	10.3675	6.64675	0.835888	0.670463	1.22654	1.34946e-08	-2.79625	down
gene38065	425	527	468	1286	2231	1179	1.65169	2.42167	1.71345	4.29564	7.25417	8.59894	0.00622967	2.14174	up
gene38078	18	27	9	132	158	81	0.643401	1.09875	0.312048	5.60324	6.46836	3.04453	1.14258e-05	3.17675	up
gene38085	393	299	384	601	864	893	5.20159	4.48264	5.37127	9.22508	12.7068	12.1283	0.000168452	1.54932	up
gene38210	402	579	504	918	1114	1011	6.96406	11.3341	9.18976	18.3859	21.402	17.9167	0.000275224	1.43252	up
gene3823	2414	1376	2081	465	817	744	12.7708	7.22385	12.8335	2.71747	4.40335	3.80429	0.00632046	-1.10422	down
gene38265	47	38	48	10634	43231	21973	0.580881	0.51273	0.562556	149.461	590.138	275.06	1.21956e-06	9.59187	up
gene38272	46	39	75	3	7	9	0.416858	0.398493	0.713626	0.02141	0.061561	0.083293	0.00341827	-2.66303	down
gene38340	1933	1634	1934	4914	6014	7190	10.9756	12.6765	12.9289	34.7177	41.3391	45.3214	7.00474e-08	2.12927	up
gene38402	1838	1684	1406	3000	3678	4088	7.44657	7.47797	5.84361	13.5256	15.977	16.38	9.39793e-05	1.53288	up
gene38406	1373	1204	1656	10316	12303	12723	8.72768	8.71004	11.0113	76.5334	87.3595	83.2943	4.84345e-16	3.47602	up
gene38414	40	61	83	479	288	422	0.469737	0.813104	1.02353	6.53537	3.76882	5.09645	1.07717e-09	3.08586	up
gene38422	9	11	7	41	184	248	0.050022	0.071133	0.03987	0.298567	1.44852	1.82925	0.00463047	4.51432	up
gene38441	380	395	281	3268	4649	2107	3.16025	3.60497	2.9057	32.704	47.3566	19.2492	2.99834e-05	3.66845	up
gene38474	26	78	66	150	436	460	0.129314	1.14077	0.374452	0.978344	2.85166	3.3651	0.00309231	2.99553	up
gene38528	762	567	552	1460	2491	2120	8.936	8.30659	8.55622	20.4218	35.7132	26.2327	8.38673e-06	2.11158	up
gene38529	2128	2193	1784	4199	5149	5270	9.4413	10.424	8.17606	22.2986	25.5126	25.3637	2.9553e-05	1.66323	up
gene38547	65	101	60	274	522	358	0.390823	0.688093	0.383444	1.92272	3.50626	2.22075	7.54322e-05	2.74895	up
gene38568	1180	1034	1383	11290	10477	9644	16.535	16.3958	20.4419	183.097	162.858	138.422	4.23569e-17	3.54393	up
gene38569	2963	1849	2163	3481	4076	3988	24.6548	17.4925	19.0246	32.9596	37.5775	33.7696	0.00823015	1.15178	up
gene38608	392	418	347	1135	2604	3172	2.44844	2.72589	2.48018	10.4256	24.3537	19.1592	0.000550987	2.97459	up
gene38626	635	707	647	78	43	82	8.46353	10.6506	8.85128	1.12561	0.590211	1.04395	6.88514e-10	-2.90313	down
gene38644	630	878	891	2277	3306	3825	3.22365	5.08835	4.86537	13.3475	18.7485	19.9447	1.19831e-09	2.36523	up
gene38663	756	770	745	2346	4155	3085	5.55676	6.41044	5.65756	21.1076	35.1711	24.3077	1.19003e-05	2.49231	up
gene38665	3494	3754	2668	4249	6457	6713	10.8248	13.1589	8.71857	15.2346	22.1875	21.3002	0.00589334	1.21255	up
gene38667	145	158	117	435	309	525	0.770771	0.949943	0.653653	2.67952	1.82046	2.85981	3.86765e-05	1.98394	up
gene38691	937	859	988	1321	1169	1933	8.5337	9.02159	8.77151	13.9734	11.1592	18.3641	0.00918355	1.06676	up
gene38720	81	56	37	0	3	11	0.574207	0.446026	0.276661	0	0.015942	0.073602	0.000337366	-3.26491	down
gene38785	226	295	205	30	36	24	1.92186	3.2067	2.06905	0.328789	0.261055	0.159295	6.33732e-05	-2.60723	down
gene38786	89	140	90	315	401	437	1.33391	2.97377	1.8053	7.59053	8.22623	6.73339	6.88606e-06	2.23853	up
gene38789	2185	2848	2663	780	357	1049	14.2097	25.7255	19.3702	5.61808	2.75227	6.58727	0.00036184	-1.44056	down
gene38802	544	883	774	2410	1989	1390	2.97488	6.03608	5.63842	15.8839	14.0036	9.74458	0.000263571	1.79565	up
gene38804	1467	969	1736	1894	2005	2771	14.4278	12.2819	16.7671	26.9432	19.7594	26.1832	0.008874	1.09372	up
gene38806	136	143	100	287	552	439	1.07994	1.33265	0.861407	2.69957	5.30665	3.55192	0.000320428	2.16153	up
gene38809	632	477	556	1254	1350	1285	3.00894	2.60201	2.78593	7.00483	7.1024	6.22105	1.75417e-05	1.6434	up
gene38878	203	109	168	18	33	29	1.28335	0.851378	1.06475	0.076553	0.139429	0.112245	0.00384317	-2.15131	down
gene389	172	124	153	309	273	368	2.17749	1.18045	1.31186	3.54043	3.57632	3.00383	0.00793679	1.49384	up
gene38942	15	16	21	735	3079	1500	0.062953	0.072767	0.089353	7.41562	28.9817	15.1836	0.000240094	7.10563	up
gene38946	366	358	368	639	701	873	3.0504	3.1045	3.07512	5.27439	6.04836	7.53754	0.000668128	1.42179	up
gene38947	441	408	338	514	824	682	3.70592	3.55192	2.93963	4.55808	7.91489	5.66447	0.008643	1.18008	up
gene38959	68	86	67	6897	10619	10527	0.628361	0.89905	0.655296	74.116	109.379	100.121	1.09568e-42	7.38435	up
gene38960	80	92	91	632	831	1010	1.08512	1.40437	1.30276	9.93481	12.5158	14.0496	1.67596e-18	3.63067	up
gene38981	798	692	1094	1523	1348	1294	9.18015	8.77065	9.90476	15.1057	13.7561	10.1328	0.00783897	1.10747	up
gene39023	394	312	346	962	1006	1037	8.84364	7.91158	8.19276	24.9919	25.0311	23.8373	5.92639e-07	1.92973	up
gene39027	3585	4536	3641	7876	11215	11187	34.2478	50.0804	36.8488	87.1741	120.475	111.496	5.51776e-05	1.76138	up
gene39067	2611	854	2314	5770	8235	12762	21.4701	8.93322	24.4942	44.1908	62.812	116.799	7.45394e-05	2.6436	up
gene39076	743	712	633	1032	1451	1519	6.51579	9.06202	5.1868	10.7652	15.3366	15.9838	0.00057859	1.34467	up
gene39085	630	575	576	1191	1724	1888	5.60026	5.78043	5.39591	12.2504	16.9962	17.189	7.06629e-07	1.83884	up
gene39086	492	565	549	1233	1651	2033	3.40508	4.42757	4.00586	11.4575	12.6806	14.4162	3.91842e-08	2.0112	up
gene39158	28	19	12	149	203	239	0.253838	0.704629	0.090695	2.16075	2.83054	2.70998	1.03876e-08	3.73682	up
gene39159	708	774	729	1050	1123	1396	2.59951	3.2122	2.82253	4.46132	4.57175	5.24917	0.00823015	1.0892	up
gene39178	184	229	221	704	557	653	2.4179	3.24443	3.61917	5.77301	4.58441	4.5308	2.29869e-06	1.99151	up
gene39179	84	67	55	430	375	515	0.868505	0.780089	0.603361	5.25641	4.39069	5.56984	2.96857e-10	3.08518	up
gene39204	150	160	122	0	13	8	1.42881	1.72872	1.22552	0	0.128789	0.078309	4.39918e-07	-3.94471	down
gene39248	584	427	397	2875	2709	5737	5.14557	4.2551	3.6891	29.3055	26.4632	51.7613	1.30809e-05	3.40381	up
gene39286	4085	3570	4684	16072	29504	23804	16.5157	16.2951	20.1227	78.5956	133.804	99.1955	7.11148e-07	2.91185	up
gene39289	240	249	224	531	908	604	1.27783	1.50416	1.26293	3.30793	5.38779	3.30433	0.000848757	1.93486	up
gene3933	48	17	18	273	458	418	1.27654	0.464785	0.522981	7.53315	16.5546	9.24164	1.78524e-14	4.23628	up
gene39396	409	353	185	57	72	50	1.76814	1.49081	1.14161	0.379156	0.295863	0.295895	0.00275277	-1.98737	down
gene39408	1393	779	818	189	242	380	12.9683	8.44896	8.34059	2.10944	2.47268	3.77519	0.00248744	-1.46856	down
gene39446	325	262	188	56	46	0	5.41444	4.94051	3.30292	1.08071	0.846347	0	8.27386e-05	-2.47832	down
gene39461	53	75	42	917	849	1934	0.83918	1.82541	0.73641	24.3916	22.0407	47.1885	4.49493e-07	4.80993	up
gene39462	11	6	12	213	238	630	0.200549	0.111054	0.240047	3.82521	4.08762	9.72843	0.000126169	5.6231	up
gene39481	650	423	536	1098	1183	1295	4.45134	3.28202	3.87271	8.71908	9.0092	9.09539	5.05239e-05	1.57327	up
gene39527	1990	1270	1522	47	44	49	10.5049	7.58285	8.47445	0.282617	0.253899	0.263531	2.66976e-30	-4.6729	down
gene39532	684	496	471	1364	2481	2782	6.59858	6.47043	5.6979	15.9083	26.8691	28.0382	2.79573e-05	2.41852	up
gene39553	417	254	316	34	61	58	1.622	0.722062	0.838434	0.097181	0.168807	0.148708	0.000122578	-2.26329	down
gene39572	328	305	228	27	68	23	3.45678	3.63815	2.53835	0.323404	0.864688	0.240271	6.81539e-05	-2.43238	down
gene39594	398	182	389	442	708	596	3.28083	1.69554	3.38482	4.22305	6.47862	5.03603	0.00621551	1.29037	up
gene39634	1521	1610	1799	4255	6922	6589	5.61971	7.05152	6.46197	16.4816	27.4582	23.2453	1.018e-07	2.25785	up
gene39637	1155	857	981	1789	2317	2119	17.6608	14.832	15.8301	31.6685	39.3089	33.1938	0.000132528	1.47724	up
gene39640	1859	1541	1650	2388	3524	4631	7.29154	6.8403	6.82762	10.8422	15.3329	18.6065	0.000984349	1.46772	up
gene39681	187	247	193	739	1384	1525	1.12716	1.68452	1.22647	5.15378	9.25255	9.41883	2.13649e-06	2.93264	up
gene39693	1033	1354	1375	5046	6611	4895	5.85252	6.11748	5.71988	23.2873	29.3512	20.3024	4.7725e-11	2.54535	up
gene39746	355	468	375	1236	1378	1653	2.00337	2.95019	2.11719	7.93166	8.3494	9.2075	1.27451e-09	2.22384	up
gene39763	1207	1244	1237	2098	3329	2672	8.15837	10.0022	9.20942	16.4157	24.8899	18.5566	0.000139185	1.54741	up
gene39770	1850	2119	1778	2914	3331	3389	16.1696	20.5433	16.4112	29.968	33.0293	30.7356	0.00611951	1.14612	up
gene39782	2015	1952	2233	521	457	603	16.1289	16.9323	20.6986	4.68842	4.00989	5.40729	3.98766e-05	-1.56786	down
gene39860	1847	1932	1983	15944	24719	29052	33.8496	38.913	37.8465	322.821	486.557	546.268	1.37097e-14	3.99824	up
gene3989	630	936	914	1672	1145	1806	8.19163	13.6032	14.2003	26.1807	17.7697	26.9972	0.000845984	1.2842	up
gene39898	1716	1393	1530	6812	14289	8835	10.665	9.81506	10.0761	49.2455	98.6617	45.5923	0.000288418	3.11836	up
gene3994	92	78	100	205	344	260	1.77567	2.28106	1.37181	3.05213	8.30141	5.52223	0.000517192	2.00615	up
gene39951	1479	1401	1016	2485	4863	4484	4.8486	4.8663	3.65057	9.10249	18.063	13.9716	0.000532974	2.01025	up
gene39953	340	676	365	1801	3174	2104	1.75193	3.94043	1.98349	10.7441	18.1532	11.1101	2.67152e-05	2.74615	up
gene39971	1620	1290	1554	4358	5587	5011	9.19439	7.79268	8.63996	26.8266	37.0127	30.5267	2.61059e-08	2.16389	up
gene39990	765	813	566	1415	1642	1651	2.93942	3.38161	2.21921	5.7677	6.35406	6.17978	4.89579e-05	1.53609	up
gene4000	65	43	27	181	105	164	2.06518	1.23279	0.551712	4.42356	2.73664	3.95831	0.00205041	2.14626	up
gene40017	304	302	271	554	800	805	2.68731	3.05893	2.4457	5.46415	7.94887	7.11595	3.65931e-05	1.70582	up
gene40018	350	545	397	1302	1800	2117	1.92553	3.13251	2.30996	8.32038	11.0008	10.9931	3.78644e-11	2.39886	up
gene40024	111	76	60	786	596	781	0.516346	0.401552	0.292934	4.25547	3.04363	3.71568	1.27817e-16	3.54292	up
gene40030	166	135	118	9	9	17	0.698026	0.644078	0.524736	0.039507	0.0403	0.069652	3.62118e-05	-3.18619	down
gene40036	914	845	946	7098	13884	6965	8.1239	8.49052	8.86608	73.0127	136.888	63.4003	0.000160748	3.79866	up
gene40042	8773	9539	7950	65852	79749	100853	89.4036	109.99	85.4594	776.603	901.433	1052.63	3.9037e-09	3.62633	up
gene40061	148	122	137	418	779	711	0.771916	0.718487	0.75293	2.53267	4.52115	3.8147	2.85798e-06	2.64599	up
gene40079	5	7	3	245	575	396	0.020358	0.050269	0.011701	1.57515	3.29384	2.44168	6.77371e-10	6.7371	up
gene40081	436	271	422	57	23	9	4.55116	3.11365	4.2355	0.69031	0.244808	0.059717	1.83847e-08	-3.22434	down
gene40084	590	608	642	100	90	86	3.74632	4.36195	4.20569	0.759218	0.59948	0.568759	8.61648e-07	-2.32788	down
gene40085	404	377	298	496	686	737	5.468	6.15961	4.61426	7.82481	10.9859	10.4524	0.005725	1.23565	up
gene40094	2465	1509	2000	17516	20078	25092	22.3239	16.2586	21.2294	201.349	226.174	223.758	4.73316e-16	3.81076	up
gene40100	19	3	7	54	95	74	0.197709	0.026213	0.069299	0.674195	1.12461	0.805475	3.78462e-05	3.41434	up
gene40118	1424	1257	1077	3454	4530	6519	18.5594	18.5948	14.8307	52.1535	65.7945	87.1792	7.13022e-07	2.34747	up
gene40122	174	188	140	1183	1817	2589	0.865683	1.07075	0.745223	7.0325	10.4503	13.686	1.05795e-08	3.86728	up
gene40136	830	896	865	3138	1818	4241	4.84882	6.23148	5.42095	22.6083	11.8518	26.5494	0.000237139	2.21288	up
gene40150	191	149	37	0	3	8	2.69005	2.36702	0.549668	0	0.031677	0.109004	0.00265053	-4.72914	down
gene40171	101	85	104	8	25	7	1.3786	1.31018	1.49129	0.112422	0.374276	0.085282	0.00332833	-2.40993	down
gene4018	499	371	405	779	1218	1102	5.33411	4.15629	4.23958	8.92189	12.4783	11.0962	1.28822e-05	1.70173	up
gene40182	350	217	274	752	1159	1441	7.1887	5.03449	5.93583	17.9277	26.4791	30.4032	8.86409e-07	2.41276	up
gene40183	228	281	273	635	989	632	1.66293	2.31932	2.10127	5.36983	8.02276	4.73287	0.000377748	1.94139	up
gene40187	236	290	238	1962	2352	2922	2.47327	3.41102	2.52471	20.5418	24.3393	27.0418	9.90334e-23	3.63607	up
gene40196	1370	1403	1121	2111	2964	3456	6.80452	7.95775	5.90661	12.3837	16.5564	16.4336	6.61876e-05	1.53095	up
gene40212	229	299	316	34	91	74	1.0987	1.62372	1.60067	0.184551	0.480641	0.361428	0.00911943	-1.67824	down
gene40250	2206	2066	2143	2866	4946	4390	10.1232	6.47085	8.48497	13.2024	25.5405	17.8183	0.00228114	1.34069	up
gene40253	0	0	0	46	57	67	0	0	0	0.916499	1.09123	1.19403	4.94596e-12	Inf	up
gene40296	190	174	169	2527	2732	4062	0.918411	0.873083	0.71923	15.8161	15.4213	22.733	1.84817e-25	4.52737	up
gene40300	611	587	519	826	1097	1341	6.45725	6.68936	6.03909	11.75	14.9041	15.4414	0.000806256	1.32826	up
gene40330	533	750	675	125	143	174	3.43763	5.42902	4.55241	1.02704	1.10093	1.20806	0.000178846	-1.75658	down
gene40336	298	284	218	405	618	794	2.18714	2.35255	1.68485	3.43504	5.02759	5.96602	0.000782487	1.58182	up
gene404	1518	1500	1503	7832	10380	13563	8.23936	9.26062	9.31489	47.5914	60.2819	76.0916	3.71152e-14	3.21327	up
gene4044	0	0	0	36	58	70	0	0	0	0.953695	1.52653	1.71907	7.39365e-12	Inf	up
gene4048	52	111	108	148	309	318	0.846249	2.79226	2.0714	2.49399	5.6401	4.95012	0.00470247	1.90153	up
gene4049	65	95	44	1176	1721	558	0.605383	0.961409	0.401476	12.6349	18.112	4.98257	0.00030751	4.49269	up
gene40499	431	580	418	84	96	104	3.8429	5.36669	3.95135	0.726224	0.867392	1.00619	0.000204241	-1.93922	down
gene4051	93	76	77	200	233	248	0.47077	0.435356	0.41516	1.17935	1.31968	1.2951	0.00226055	1.88153	up
gene40510	26	12	15	149	606	379	0.654702	0.285411	0.329219	4.48108	17.6324	10.1631	0.00208242	4.8674	up
gene4054	5	66	69	570	1388	697	0.03983	0.54535	0.528758	6.29505	13.0451	4.91013	0.000195311	4.63292	up
gene40540	344	254	348	1819	2284	2604	3.28352	2.74205	3.5099	20.7325	24.2837	26.4014	1.4249e-18	3.24212	up
gene40576	427	372	350	1088	1528	1112	4.01	3.95373	3.46502	11.835	15.9274	10.6969	1.27596e-07	2.11779	up
gene40593	32	12	26	78	82	78	0.286381	0.114972	0.24442	0.80891	0.821202	0.720693	0.00814853	2.20885	up
gene40626	20	15	28	58	185	165	0.177001	0.132807	0.235162	0.553753	2.36796	1.59681	0.00470247	3.1203	up
gene40627	34	23	21	95	224	212	0.123245	0.091831	0.078393	0.400396	0.907649	0.795182	0.000107407	3.18773	up
gene40697	7033	7385	6967	11826	11636	17116	80.1198	96.8108	83.0237	143.903	147.748	196.532	0.0075992	1.31927	up
gene40715	157	268	467	518	672	931	0.634549	1.2345	1.93594	2.37403	3.06921	3.91206	0.000657709	1.64439	up
gene40736	359	417	455	58	80	96	2.6554	3.48438	3.54772	0.493534	0.655724	0.725111	0.00029552	-1.99633	down
gene40746	3508	2702	3405	7112	8677	9357	34.2278	27.6947	34.4369	77.3819	95.3717	94.6607	2.25978e-05	1.80296	up
gene40803	232	283	284	562	619	710	2.69666	3.73459	3.54348	10.9588	8.59773	8.57451	0.000122594	1.64111	up
gene40836	366	455	313	777	1083	1249	6.80478	6.26873	5.47837	13.8478	15.8174	22.7101	1.20377e-06	1.84651	up
gene40878	533	446	425	121	82	168	11.6238	11.1373	9.86654	3.07639	2.12036	3.68341	0.00519441	-1.52457	down
gene40898	483	589	420	22860	34534	41594	3.98723	5.6087	3.6555	218.695	317.612	352.172	5.17411e-28	6.44302	up
gene40921	445	364	298	573	853	984	6.92782	8.99309	5.17725	10.158	19.6251	21.1228	0.000174455	1.53004	up
gene40946	2702	2425	2871	14143	10520	11640	28.5451	29.1414	32.4497	181.513	126.896	129.465	1.73285e-09	2.59373	up
gene40962	1163	924	1053	1813	2351	2077	10.835	10.6504	10.5062	20.8456	27.2937	20.8169	0.0002984	1.41052	up
gene40968	964	768	772	247	182	234	11.2499	10.1406	9.50432	3.32412	2.35514	2.78693	0.00055588	-1.5075	down
gene40974	786	528	670	1085	1240	881	7.94792	6.39804	6.92065	13.2162	13.6048	9.46838	0.00878959	1.12352	up
gene40981	467	338	424	707	688	741	5.1227	4.19083	4.91016	8.9778	8.3789	8.33213	0.00595978	1.21582	up
gene40990	343	243	265	533	598	543	3.17922	2.85634	2.75216	6.85989	6.5154	6.38872	0.00246557	1.39824	up
gene41017	403	330	499	6109	10201	5685	10.5048	10.1748	13.6094	186.796	300.745	153.02	2.9449e-08	4.59162	up
gene41054	1071	739	878	1461	1876	1974	7.37462	5.75745	6.3744	11.6464	14.3304	13.9295	0.000312254	1.40193	up
gene41059	19	16	18	52	127	125	0.239392	0.221837	0.266014	0.987821	2.00684	2.11766	0.000528411	2.93382	up
gene41076	1124	949	1108	421	132	507	26.0823	24.5354	27.3912	11.0616	3.66222	11.9631	0.00680907	-1.19696	down
gene41108	48	77	70	627	1060	1050	0.603187	0.945623	0.726448	8.95512	14.8784	13.9562	1.55808e-14	4.20352	up
gene41124	1320	1109	1284	3260	3379	5911	13.8638	13.1812	14.2214	39.6265	39.3637	63.5892	2.38943e-05	2.15609	up
gene41127	1089	1122	1059	2692	4219	4882	10.3695	10.6165	9.69934	30.6589	44.0533	51.1721	4.40295e-07	2.25182	up
gene41139	515	199	378	1319	1015	1474	4.20906	2.51301	2.92266	10.3792	8.80497	10.1739	2.96008e-09	2.23411	up
gene41145	650	488	523	931	1029	1065	6.53333	5.55017	5.54304	10.8201	11.4742	10.9589	0.00174468	1.28156	up
gene41199	188	447	599	33	24	27	1.68479	4.5454	5.67727	0.334819	0.234513	0.243386	0.00164302	-3.4858	down
gene4122	308	204	316	2554	4352	2360	3.83424	2.35821	3.68565	32.6929	61.2388	28.0614	2.82488e-06	3.92457	up
gene41253	327	248	169	5	3	0	1.70689	1.46476	0.9288	0.024482	0.011752	0	5.28311e-15	-6.09496	down
gene41254	24	60	56	279	530	626	0.142622	0.417107	0.358242	1.97991	3.6052	3.93178	1.59004e-07	3.73481	up
gene41259	7	3	5	212	319	93	0.071659	0.025845	0.054696	2.76098	3.98486	1.06857	7.2817e-05	5.84344	up
gene4126	600	794	607	3349	6768	7291	10.3849	15.6835	10.6019	65.8643	131.017	132.288	6.82135e-07	3.51321	up
gene41281	199	146	193	951	1304	2125	1.12471	1.05459	1.02699	5.92533	7.43412	10.3932	1.58089e-06	3.43043	up
gene41321	257	262	228	542	613	1021	3.98825	4.40316	3.76364	9.213	10.6524	15.9743	0.000120902	1.93328	up
gene41339	19	9	19	56	58	66	0.174144	0.092533	0.177323	0.591972	0.586311	0.621532	0.00605051	2.36943	up
gene41341	24	9	17	34	77	74	0.204785	0.078649	0.149093	0.332317	0.724439	0.642975	0.00712838	2.32949	up
gene41342	16	33	15	73	67	80	0.115662	0.278353	0.11386	0.636391	0.564755	0.618257	0.00862864	2.15042	up
gene41373	616	447	589	1036	1286	1139	8.15886	6.65754	8.16909	15.9146	18.3529	15.4287	0.000151677	1.49054	up
gene41396	4726	3717	3297	6041	8749	8227	25.4553	22.9996	19.1203	38.62	51.0029	46.1683	0.00196338	1.38702	up
gene41449	1485	1293	1069	2066	4044	4560	5.34493	5.57049	4.05709	8.60387	16.1468	16.8133	0.00245844	1.87742	up
gene41462	460	429	326	1268	1939	1973	3.4188	3.61174	2.55975	10.9187	16.0031	15.0421	1.64852e-10	2.49801	up
gene41463	0	16	3	854	2914	3065	0	0.17997	0.021828	10.0941	33.0379	32.0901	7.72603e-10	8.79568	up
gene41476	406	315	385	101	75	101	3.12525	2.70412	3.07633	0.878917	0.621023	0.775935	0.00710911	-1.58632	down
gene41504	1583	2335	1387	343	326	472	8.03678	13.4254	7.43895	2.00737	1.8312	2.44867	0.00439612	-1.83855	down
gene41531	55	67	54	3	15	8	0.250719	0.348019	0.261916	0.010833	0.072406	0.037392	0.00965638	-2.34151	down
gene41571	829	714	815	151	285	208	2.84287	2.75814	2.94785	0.596678	1.07351	0.724251	0.00103601	-1.45014	down
gene41572	372	506	561	1822	2243	3026	2.89227	5.3399	5.51068	19.5182	22.8181	28.6554	6.42207e-13	2.69277	up
gene41595	4535	4878	4106	8496	9322	10074	62.2011	75.6947	59.4043	134.859	141.826	141.515	0.0013779	1.44614	up
gene41596	1156	1218	1150	1825	1968	2010	11.4203	13.441	11.6225	20.869	20.9577	20.5203	0.00586966	1.12454	up
gene41684	480	426	498	701	788	1022	6.74232	6.77068	7.38737	11.4013	12.2777	14.7085	0.00302524	1.24466	up
gene41696	3275	3614	5135	13488	22514	15231	46.2548	57.7416	76.4973	220.431	352.652	220.299	1.65452e-05	2.51134	up
gene4171	541	396	457	1363	1682	1874	11.3254	9.14193	9.82089	32.7408	37.7317	39.9525	1.2019e-09	2.23496	up
gene41752	160	205	71	465	783	967	1.30413	1.47551	0.482064	4.47203	6.43431	7.01842	4.17874e-06	2.72493	up
gene41755	335	272	306	767	1184	1058	4.49478	4.19524	4.62295	12.6772	18.7707	15.5305	2.9145e-08	2.13887	up
gene41757	256	311	266	7397	9672	6843	2.01691	2.78107	2.21864	67.2589	84.2645	54.9567	3.09365e-26	5.25192	up
gene41777	181	153	98	20	39	16	1.88029	1.80733	1.07145	0.232112	0.444159	0.161188	0.00615252	-2.09435	down
gene41804	1431	1215	1571	388	293	300	64.202	61.6267	74.3362	20.1064	14.5586	13.7703	1.22098e-05	-1.6881	down
gene41830	216	153	157	336	466	426	3.42137	2.75066	2.62404	6.17407	8.22154	6.92596	0.00108138	1.64451	up
gene41848	2743	2112	2002	4295	4287	5782	47.7491	41.5916	36.7538	86.508	82.7645	103.087	0.00029552	1.47455	up
gene41858	354	700	426	1190	1828	2277	3.96129	8.864	5.03296	15.4119	22.707	26.108	8.97637e-06	2.21163	up
gene41923	166	109	76	481	457	668	0.897739	0.658784	0.425625	3.09341	2.84251	3.92926	8.42953e-09	2.60324	up
gene41927	69	70	27	174	349	239	0.432515	0.489417	0.180592	1.27998	2.50891	1.62931	0.000452727	2.60656	up
gene42004	1118	1716	1770	1998	2379	3049	6.32531	15.767	14.9879	12.1458	13.4274	15.4737	0.00858647	1.07883	up
gene42011	384	347	477	1249	3061	2288	1.63754	1.94983	1.60444	6.63259	12.4946	9.01002	0.00106972	2.87187	up
gene42040	821	2244	568	51913	87690	51392	3.58811	10.9608	2.60278	260.627	421.76	230.293	5.60741e-13	6.08585	up
gene42055	102	149	113	275	393	406	0.623851	1.03121	0.728997	1.94425	2.66737	2.54426	0.000142064	1.95197	up
gene42078	140	106	108	5	12	5	1.96572	1.68418	1.58618	0.065466	0.185078	0.05823	8.21004e-06	-3.5681	down
gene42089	414	200	292	716	1326	1512	0.998537	0.769723	1.03677	2.43787	3.88052	4.0453	8.8399e-05	2.40058	up
gene4214	362	221	682	29	43	0	3.14724	2.16592	5.78622	0.269043	0.401404	0	0.00175342	-3.65817	down
gene42160	988	930	1146	2369	3366	4332	6.57396	6.31329	8.56318	18.3314	22.3989	29.3898	6.63937e-07	2.12042	up
gene42183	405	300	401	2766	4734	5424	3.4392	3.04318	3.19616	26.6354	45.8302	48.6175	4.49177e-11	3.96179	up
gene4220	36	46	45	709	354	849	0.58983	0.872172	0.863584	13.8843	6.85511	14.8889	7.20106e-09	4.29325	up
gene42214	222	193	217	390	525	438	2.04132	1.98544	2.11691	4.15782	5.37765	4.13674	0.00196475	1.51628	up
gene42232	1491	1294	1307	7482	16610	15316	5.9227	5.79598	5.40495	34.7858	72.341	61.538	2.10025e-06	3.68149	up
gene42270	2203	1592	2350	13481	24593	23151	36.0778	29.4904	40.5933	255.552	446.83	388.403	3.38989e-10	3.73927	up
gene42287	770	468	583	2784	3415	6236	3.69726	2.54535	2.9682	15.774	18.8379	30.789	3.16011e-05	3.17919	up
gene42298	811	548	751	3281	4497	4455	4.57679	2.24708	3.44703	17.6685	24.3492	21.4139	4.70437e-15	2.9583	up
gene42329	103	94	128	9	9	13	0.769459	0.797667	1.01016	0.070645	0.067654	0.097066	0.000227561	-2.98582	down
gene42357	714	698	578	1723	2885	3148	2.92951	3.23894	2.5008	8.18054	13.1275	13.2301	1.02848e-06	2.3656	up
gene42414	232	202	110	27	32	29	1.15419	1.1257	0.574001	0.149242	0.171192	0.138582	0.00202634	-2.21883	down
gene42436	222	236	209	369	492	782	1.03054	1.23927	1.27004	2.47612	3.17132	4.64274	0.00291598	1.69087	up
gene4244	80	64	74	222	157	196	0.854073	0.781609	1.07953	2.71438	1.83268	2.13129	0.00589423	1.81099	up
gene42463	1477	1109	1723	3064	4033	4589	6.58876	5.99065	7.92577	15.5171	18.5952	19.2512	1.42331e-06	1.85635	up
gene42501	297	365	302	642	1004	686	4.81934	6.47213	5.23675	10.1877	14.1798	11.2581	0.000672995	1.68336	up
gene42573	1895	2505	1407	4641	6317	9282	56.3507	83.7309	43.7728	169.747	208.209	281.187	4.03635e-05	2.18083	up
gene42594	51	90	82	631	908	1062	0.713166	1.42095	1.02697	10.7518	14.1384	15.9783	1.25734e-18	3.92938	up
gene42595	34	21	17	381	694	721	0.460723	0.221204	0.222578	5.79619	10.7953	10.4099	5.62167e-14	5.0612	up
gene42660	378	359	234	1161	1622	2232	0.971918	1.64297	0.612555	5.38151	6.30693	9.42164	4.67223e-08	2.76372	up
gene42674	608	625	594	1125	1324	1503	3.6983	4.30216	3.81056	7.92725	8.93473	9.36725	7.35478e-05	1.51579	up
gene42675	94	66	48	644	695	563	1.06395	0.846799	0.566635	8.48714	8.77656	6.56576	5.33454e-16	3.61537	up
gene427	2824	2668	2411	19553	21355	34522	9.35366	10.0125	8.29849	77.5272	78.9341	114.106	1.77129e-12	3.64943	up
gene42715	345	328	249	42	72	70	2.05809	2.21481	1.56539	0.28388	0.471967	0.423601	0.00173965	-1.91855	down
gene42741	11	12	18	500	1928	1246	0.089913	0.119516	0.160616	5.1296	18.9949	11.335	1.3927e-05	6.9091	up
gene42747	1011	880	1021	234	183	156	5.48037	5.46999	6.48063	1.41978	0.886239	0.957446	2.39071e-06	-1.92733	down
gene42753	502	483	474	664	1056	1024	1.57325	1.72215	1.60669	2.40563	3.76195	3.32626	0.00125848	1.32041	up
gene42776	2368	2368	2519	3775	5550	5419	6.43708	6.57856	6.85627	11.074	14.9909	14.2679	0.000521615	1.43188	up
gene42791	3	35	10	846	44	917	0.035871	0.388158	0.135131	14.5766	0.703717	13.9878	0.00906381	5.52806	up
gene42807	1255	1020	1272	1801	1888	2082	13.9161	12.7936	14.885	23.1143	23.2336	23.6533	0.00682644	1.11624	up
gene42816	374	281	280	664	975	860	4.11784	3.49471	3.248	8.45433	11.9015	9.68593	4.5508e-06	1.83839	up
gene42818	23	35	25	228	305	370	0.143602	0.250762	0.164818	1.70446	2.43718	2.87703	2.13642e-11	3.82777	up
gene42845	0	8	5	91	176	68	0	0.075858	0.04956	0.993711	1.84969	0.658974	0.000172751	5.05541	up
gene42847	193	186	165	998	1023	2355	2.71377	2.96057	2.44319	16.2604	15.9697	33.9533	0.000562935	3.39165	up
gene42849	156	95	104	660	656	1433	2.16976	1.51974	1.53585	10.7074	10.2321	20.6602	0.000125258	3.35561	up
gene42853	3686	2973	3374	7221	10093	11913	24.2199	22.1148	23.4077	54.9227	73.6756	79.0462	5.16793e-06	1.95318	up
gene42861	214	100	191	568	794	642	0.968391	0.481727	0.862631	3.02514	4.2935	3.08323	1.11153e-08	2.42954	up
gene42872	476	484	463	622	855	1174	1.91907	2.16766	1.98793	2.93124	3.83095	4.85118	0.00208227	1.29461	up
gene42891	211	220	220	536	576	673	1.05408	1.24014	1.15677	3.1	3.20046	3.43761	1.74527e-05	1.85753	up
gene429	0	5	0	57	78	37	0	0.030329	0	0.37088	0.486946	0.211823	6.28973e-08	5.4066	up
gene42914	2506	2733	2993	16932	27512	28496	23.3104	28.8748	33.8547	190.423	324.329	302.262	4.07565e-13	3.55217	up
gene42917	2407	2046	1732	659	764	594	9.90566	9.52397	7.51917	3.1347	3.48412	2.50341	0.00264938	-1.19877	down
gene42982	471	529	368	137	87	109	4.04051	5.15333	3.27272	1.30409	0.814551	0.915589	0.00238143	-1.64309	down
gene42989	85	104	121	1385	1060	977	0.826779	1.15147	1.24674	15.7417	11.5484	9.82746	7.99645e-23	3.87125	up
gene43004	435	549	450	1139	1272	1302	3.00455	4.10945	2.5874	8.24848	7.59651	7.17947	2.44585e-06	1.76986	up
gene43029	1035	1077	1039	194	169	323	9.76799	12.2601	10.1135	1.70979	1.68414	3.68227	9.54541e-06	-1.81068	down
gene43030	129	65	106	10	20	8	0.720405	0.411775	0.624879	0.063451	0.12142	0.045702	0.00188584	-2.52489	down
gene43039	836	815	764	113	94	150	3.62561	6.76285	3.6258	0.560301	0.449677	0.661461	5.8158e-08	-2.36205	down
gene43046	109	73	85	3255	4014	4726	3.51361	2.64723	2.89006	121.812	143.955	156.521	9.04222e-46	5.9066	up
gene43072	106	109	129	26	10	0	1.17551	1.3636	1.5131	0.323681	0.11539	0	0.000357477	-2.82315	down
gene43074	4982	4406	4808	1150	806	1254	20.2288	23.1349	26.0663	5.66251	4.01475	5.83667	6.6402e-06	-1.74245	down
gene43075	183	49	234	635	573	617	2.19021	0.663447	2.95924	8.82021	7.62471	7.58243	3.52284e-08	2.4175	up
gene43084	335	481	303	17	12	32	1.74365	2.97283	1.86067	0.09763	0.067154	0.1659	2.63429e-08	-3.83248	down
gene43091	425	347	384	134	67	79	3.61268	3.5591	3.37977	1.36875	0.595567	0.633826	0.00454177	-1.63233	down
gene43109	249	286	282	5	12	29	1.30559	1.6976	1.56456	0.027771	0.064907	0.152128	9.15616e-09	-3.77701	down
gene43114	686	551	638	1383	2391	1878	4.2301	4.10069	4.40135	8.49147	17.058	12.7439	6.1446e-05	2.01436	up
gene43120	1102	884	1012	1584	2015	2210	5.63535	4.97212	5.45593	9.08574	11.2108	11.7347	0.00044342	1.36755	up
gene43137	648	588	567	1376	2177	2697	3.05348	3.28346	2.8189	7.61134	11.3788	13.0244	8.92479e-06	2.19688	up
gene43194	117	142	100	657	1064	1433	2.90907	3.99946	2.63511	19.0148	29.5144	36.7099	6.73436e-08	3.52255	up
gene43197	792	975	668	1600	4198	4073	8.66198	12.0778	7.72696	20.3106	52.9914	45.7504	0.005411	2.41532	up
gene43382	8	8	12	150	239	280	0.089094	0.136507	0.151404	3.29282	4.55861	8.52623	1.08281e-13	4.98625	up
gene43513	1183	813	921	1377	1742	1668	7.52588	5.84262	6.04734	9.93215	12.22	10.8416	0.00596972	1.13654	up
gene43575	286	243	222	24	64	81	1.13633	1.4775	0.925773	0.111374	0.277916	0.32472	0.00920544	-1.7487	down
gene43592	543	466	475	2462	3122	3846	2.81683	2.39762	2.71983	14.6383	18.5045	20.9584	9.29215e-17	3.07438	up
gene43601	32	21	23	92	134	181	0.405379	0.234398	0.243312	1.29927	1.7837	2.26353	6.35856e-05	2.83372	up
gene43613	1530	1423	1271	10563	11071	12252	10.7082	10.4133	8.78781	78.7003	81.114	80.9757	8.89281e-16	3.41019	up
gene43634	1430	2160	1810	3363	3813	3512	6.45248	12.7478	9.62816	20.2425	18.8893	20.3417	0.000528544	1.38014	up
gene43635	119	92	152	448	369	792	0.837384	0.85631	1.07045	4.23352	2.80865	5.73193	0.00012766	2.54867	up
gene43650	3015	3559	2934	38088	57630	61023	31.0843	41.5112	31.8986	454.41	659.004	644.341	4.56129e-15	4.44104	up
gene43656	60	35	48	190	108	135	0.504482	0.325379	0.420228	1.84813	1.00282	1.16368	0.00472384	2.02206	up
gene43669	10	11	19	40	60	61	0.041261	0.053369	0.083629	0.198798	0.287315	0.270962	0.00523239	2.42089	up
gene43691	135	131	133	244	358	369	1.21659	1.26543	1.34848	2.58656	3.88427	3.90668	0.00193403	1.69066	up
gene43697	785	780	740	4972	7892	9718	4.72588	5.69128	4.55798	36.0728	54.1103	62.2846	5.43735e-11	3.69285	up
gene43705	1824	1407	1365	4103	5270	6294	10.827	9.91351	8.95007	31.1571	35.1002	39.2759	1.9443e-08	2.17979	up
gene43712	86	16	31	118	240	310	0.714951	0.150519	0.264789	1.40254	2.22483	2.94623	0.00100636	2.78088	up
gene43719	2435	1882	2363	3856	4719	4835	31.4892	27.5322	32.226	57.8515	67.6658	64.2805	0.000544782	1.42267	up
gene43721	476	472	378	1597	2625	3301	2.51008	2.84738	2.13042	9.73562	15.2477	18.2273	4.75882e-07	2.90211	up
gene43731	509	474	537	1299	1636	1491	4.57318	4.90744	5.07163	13.6506	15.9321	13.5013	1.42799e-07	1.95572	up
gene43784	570	311	470	28	11	43	4.88227	3.12279	4.48767	0.238987	0.084821	0.332087	6.08847e-11	-3.64181	down
gene43855	291	133	259	477	384	464	1.48372	0.762991	1.38935	2.81529	2.17181	2.42454	0.00624908	1.38806	up
gene43907	93	189	62	526	879	462	0.391273	0.912479	0.278604	2.61946	4.506	2.03156	0.000463499	2.82578	up
gene43965	1178	1240	1318	1650	2170	2339	6.0805	7.71272	7.25124	10.225	12.437	12.0478	0.00585262	1.12582	up
gene43976	61	53	17	139	245	211	0.675493	0.661726	0.191766	1.79433	3.04455	2.42105	4.00417e-05	2.59034	up
gene4398	315	252	241	1229	1429	1286	3.16265	2.16161	2.54875	10.6695	10.8269	9.822	4.52529e-13	2.70448	up
gene4399	419	316	466	744	1174	1257	5.9654	5.20334	7.29237	12.3184	18.5615	18.6565	6.87084e-06	1.8203	up
gene43991	277	343	326	0	0	0	1.29893	1.79947	1.61245	0	0	0	8.82044e-24	#NAME?	down
gene4400	540	422	530	2592	4981	4728	6.7142	5.92813	6.99892	37.5444	69.1102	60.1617	4.47293e-08	3.46201	up
gene44002	313	148	126	4	0	22	2.15281	1.20958	0.958866	0.029906	0	0.145111	8.80682e-05	-4.13091	down
gene44030	53	45	44	114	207	256	0.735276	0.703754	0.6397	1.8477	3.21281	3.66101	0.000138215	2.42809	up
gene44092	915	756	879	1408	1414	1899	8.63649	8.2152	8.58727	14.9447	15.1293	16.8078	0.000931127	1.29606	up
gene44116	581	549	547	2141	2971	4523	8.33121	8.86572	8.25942	35.4931	47.196	66.3649	1.78231e-06	2.91899	up
gene44124	14963	13715	16809	3209	2389	2842	76.6162	77.5944	91.3129	19.1512	13.6047	14.8345	3.93674e-06	-2.0208	down
gene44154	1982	1552	1464	2533	4009	3310	6.94203	6.56745	5.92636	10.0041	15.5647	12.3193	0.00050812	1.39909	up
gene44156	592	549	556	194	138	178	2.85105	2.98827	2.82581	1.06471	0.715835	0.874935	0.00959665	-1.32951	down
gene44179	378	211	357	1108	1359	1689	3.21544	2.00709	3.15293	10.8417	12.4935	14.7895	5.97005e-12	2.55885	up
gene44180	1280	1110	1113	3715	6496	5757	14.1677	12.9645	12.8817	46.3526	63.8549	62.0322	2.83231e-07	2.6037	up
gene44211	210	128	134	606	883	887	1.82307	1.24832	1.24362	6.50904	8.56054	7.90349	1.22629e-11	2.75549	up
gene44284	326	139	206	1465	989	2043	1.62287	0.628127	1.61425	10.4697	6.95124	14.6707	1.89553e-08	3.16436	up
gene44285	402	446	689	81	68	108	2.87992	3.61972	5.17288	0.783381	0.862929	0.792161	1.73817e-05	-2.18106	down
gene44293	883	748	832	1479	1292	2043	10.0837	9.65467	10.0149	19.5409	16.3528	23.8873	0.000373744	1.36908	up
gene44328	154	103	96	456	554	521	0.895063	0.684043	1.07704	7.11208	3.59322	5.01089	3.4052e-08	2.53871	up
gene44355	4867	3878	4691	10466	15539	17460	29.9285	28.7387	28.9502	81.9284	107.127	119.389	3.25342e-06	2.10669	up
gene4438	86	88	106	17675	24127	28949	0.802705	0.835943	1.24363	173.823	226.968	252.721	2.98398e-50	8.38505	up
gene4439	747	526	493	1551	2726	3293	5.59531	4.15438	3.68162	13.3053	22.7709	24.8112	2.31426e-05	2.51198	up
gene44500	2463	1829	2001	3693	4032	6138	28.619	24.0386	24.5262	49.6531	51.9535	73.0434	0.000115683	1.54568	up
gene44516	542	449	560	2830	3478	4318	1.77555	1.66485	1.93705	10.7391	23.7512	14.6761	1.42655e-17	3.18598	up
gene44520	341	275	255	77	58	64	2.23667	2.0329	1.77489	0.584005	0.466836	0.423981	0.00680907	-1.71762	down
gene44546	1071	810	1099	1587	1933	2834	7.47931	6.40226	8.09811	12.8301	14.9749	20.2772	0.000154912	1.50061	up
gene44562	337	333	317	792	1072	1064	1.85505	2.02355	1.93253	5.10223	6.09999	5.92291	3.0535e-07	1.97626	up
gene44576	850	642	1006	1667	1943	3306	5.30086	4.15013	6.60835	11.3274	12.9482	20.1643	0.000764288	1.87454	up
gene44577	606	625	554	868	815	1249	3.21017	3.78168	3.13059	5.3758	4.81097	6.76374	0.00761296	1.10997	up
gene44698	1734	1264	1895	2924	3822	3471	24.408	20.1879	28.1514	48.2372	60.4291	50.7318	0.000194511	1.48605	up
gene44700	1566	2275	1531	16564	16232	21797	72.822	119.747	75.1081	891.779	837.601	1038.58	2.51649e-16	3.72804	up
gene44718	710	735	842	3298	4485	4704	3.94966	4.45012	5.46035	20.4654	30.7874	27.1622	3.0342e-14	2.85572	up
gene44756	2189	1525	1881	3865	5277	5674	17.1987	13.5542	15.5928	35.1415	45.9963	45.6618	4.10611e-06	1.82367	up
gene44782	441	791	502	825	1044	1116	4.54245	9.23434	5.45338	9.84902	11.9456	11.794	0.00410484	1.16479	up
gene44802	223	225	201	427	496	449	1.03454	2.05558	0.984486	3.52768	3.69126	3.26177	0.00214855	1.48873	up
gene44803	799	998	573	1643	2213	2351	3.65774	5.23767	3.0571	8.47576	10.7528	11.1086	1.29454e-06	1.78049	up
gene4481	512	516	379	1516	3909	3509	7.92995	8.99676	6.18423	32.1217	79.2553	63.8859	0.000507151	3.0729	up
gene44831	13	22	12	109	100	60	0.012696	0.025228	0.013163	0.132602	0.116561	0.064351	0.000178133	2.91134	up
gene44832	80	88	71	2266	11704	8003	2.28131	2.8548	2.14996	76.2164	376.89	237.944	9.78631e-05	6.93571	up
gene44848	610	574	426	5123	6032	7185	14.0501	14.9433	10.3521	136.555	154.113	169.525	5.42192e-23	3.91133	up
gene44851	126	44	50	230	323	354	0.988987	0.333753	0.430464	2.49938	3.19102	3.0777	8.00879e-06	2.48417	up
gene44869	0	15	20	104	106	47	0	0.111538	0.14273	1.27289	1.12145	0.501278	0.000228612	3.26826	up
gene44875	1259	965	1118	1902	2019	1962	5.95063	5.45474	8.06509	9.23838	9.07719	8.37437	0.00216618	1.2343	up
gene44885	87	129	116	18	11	22	0.29106	0.487733	0.407449	0.06719	0.037621	0.075964	0.00489774	-2.32391	down
gene44907	259	236	195	369	551	508	3.32711	3.43127	2.63688	5.48023	7.85319	6.67818	0.00235601	1.45987	up
gene4491	7470	6228	3228	8811	10489	12867	46.8182	44.1629	21.3393	75.0425	72.9149	82.5927	0.00530527	1.32849	up
gene4492	74	47	121	387	293	249	1.18194	0.848653	2.02357	7.14904	5.18313	4.07602	1.56988e-05	2.3746	up
gene44938	511	421	452	1231	1433	1719	28.4982	26.6216	26.6663	79.4918	88.6843	98.0234	2.08395e-08	2.07254	up
gene44996	202	272	248	26	34	63	0.679142	1.03716	0.882528	0.098763	0.12635	0.21651	0.00110003	-2.17439	down
gene44998	250	233	273	1104	1870	2122	1.79187	1.88172	2.0602	9.15307	14.8642	15.5704	9.72922e-09	3.16024	up
gene45002	2456	1298	2416	2965	4208	3332	25.0282	15.0505	25.7824	35.191	46.3946	36.285	0.00519994	1.20577	up
gene45048	1698	1302	1545	9963	10946	16164	14.4182	12.5193	14.2591	115.832	122.235	167.004	1.27776e-15	3.43485	up
gene45052	208	561	424	881	1350	1192	1.31857	4.16867	2.8155	6.40304	11.6549	9.5273	7.96002e-06	1.90035	up
gene45079	1176	949	1014	2442	2087	4393	11.5074	10.5048	10.4568	27.6524	22.6471	44.0275	0.0021259	1.90236	up
gene45105	58	68	34	168	169	172	0.466764	0.623384	0.286887	1.57725	1.5189	1.42749	0.00195719	2.06358	up
gene45106	661	633	616	1529	2469	2980	2.59264	2.82742	2.68113	7.3306	10.6574	12.1731	5.19934e-06	2.27179	up
gene45122	15	7	17	62	311	407	0.21337	0.104002	0.255596	1.0718	5.19927	6.29598	0.00430455	4.74719	up
gene45124	935	910	670	1267	1468	2452	7.05996	6.28831	5.64708	10.7195	14.8492	16.3806	0.00547527	1.43461	up
gene45146	88	54	78	851	2353	1075	0.378131	0.321262	0.387947	3.673	9.19841	3.8736	0.00139961	4.72939	up
gene45173	75	94	81	1625	2104	2537	0.627463	0.896814	0.720602	15.8967	19.8795	22.0828	1.647e-37	5.04081	up
gene45195	4895	4178	4679	15323	19870	21656	52.9379	51.1151	53.3748	191.752	238.334	239.853	1.15479e-07	2.45875	up
gene45198	0	0	4	105	234	175	0	0	0.052665	1.61699	3.47124	2.39399	1.43086e-11	7.45853	up
gene45199	60	180	91	1389	2553	2127	0.522074	1.77778	0.835913	14.0517	24.7649	19.0436	1.98997e-12	4.5663	up
gene45220	192	115	138	671	1879	1682	3.29842	2.22855	2.49848	13.3594	35.8831	29.6517	0.000229625	3.67753	up
gene45233	648	483	742	218	171	152	3.32234	2.79757	4.00912	1.29142	0.952711	0.793141	0.00478572	-1.36719	down
gene45256	369	883	558	1809	3654	2315	2.3814	6.40955	3.76998	13.4392	26.2522	15.2409	0.00156894	2.49111	up
gene45266	349	409	427	768	1174	1370	2.35743	3.26069	3.13856	5.08568	8.57715	9.49307	5.83551e-06	1.8814	up
gene45275	973	891	823	1404	2109	1723	4.3191	4.47286	3.85213	7.21428	10.3862	7.83403	0.000407657	1.37737	up
gene45277	145	118	109	494	734	711	1.98741	1.6339	1.33448	6.84546	10.0521	8.83366	6.74378e-11	2.796	up
gene45278	525	480	457	3896	5048	5403	1.92587	1.99126	1.76637	16.5473	20.55	20.3122	8.04966e-22	3.70261	up
gene4529	0	219	190	1197	4226	5093	0	3.73834	3.33657	17.6288	51.0422	68.8024	0.000143554	5.03325	up
gene45306	4587	5873	5558	2419	1437	1649	12.5901	17.3201	15.4472	8.06015	4.67919	5.05366	0.00903164	-1.14307	down
gene45309	5586	4266	5273	41078	31652	30946	86.9164	75.0946	86.5398	739.609	546.22	493.117	4.81293e-10	3.19661	up
gene45311	2221	1676	1607	3711	4392	2998	36.2722	31.7975	27.895	58.1338	68.195	46.6547	0.000405358	1.43827	up
gene45313	54	13	26	3611	6041	5434	0.870213	0.227437	0.431799	67.8457	108.31	90.0129	2.84275e-33	7.79857	up
gene45314	1469	1458	1552	5153	8658	6541	28.6094	32.1332	31.8898	116.174	187.086	130.513	6.80395e-07	2.6001	up
gene45325	478	384	372	1703	2189	2807	1.96175	1.76184	1.73316	8.05702	9.92763	11.9559	1.11278e-14	2.84765	up
gene45326	11	12	13	48	96	72	0.183471	0.228029	0.233806	0.979961	1.90284	1.31077	0.000234341	2.99889	up
gene45356	91	55	126	755	930	1014	0.804009	0.53633	1.23684	10.1763	11.9144	10.5855	7.68699e-20	3.73793	up
gene45401	280	265	334	520	656	704	2.87055	3.07987	3.6165	6.17801	7.47267	7.40878	0.000534161	1.50687	up
gene45410	972	679	936	5452	9880	11749	10.1354	7.95442	10.1619	62.5897	109.845	120.217	1.58393e-08	3.8038	up
gene45413	672	338	511	4910	4177	4996	22.3002	12.6306	17.821	190.103	154.684	170.24	4.43294e-21	3.63921	up
gene4558	402	298	378	586	835	821	2.77213	2.25482	2.11166	4.49361	5.40557	4.81539	0.00044201	1.47598	up
gene4559	168	119	204	2849	4362	3843	0.781044	0.624099	1.00274	15.406	22.6067	18.3913	6.77272e-25	4.91928	up
gene45597	1195	1185	1024	1747	1837	2055	2.64327	2.91602	2.37673	4.04839	4.43431	4.90166	0.00531381	1.13161	up
gene45632	1884	2363	1516	2978	4118	3940	8.70432	12.0023	6.82515	15.5726	18.6943	18.2126	0.000939474	1.333	up
gene45667	862	661	641	1279	1091	1271	8.87341	7.44862	6.94796	15.1012	11.372	13.362	0.00461849	1.16327	up
gene45688	127	99	83	3	9	3	1.31333	1.16287	0.88838	0.035289	0.091415	0.021103	2.65348e-06	-3.92127	down
gene45708	1267	1758	1300	2472	2969	3555	12.1919	19.1369	13.1912	27.5234	31.6828	35.0341	0.000179864	1.44487	up
gene45748	714	645	466	4272	6522	9697	5.29139	4.93322	3.17908	40.8814	54.9761	73.803	6.472e-08	3.88412	up
gene45753	198	231	107	1163	1038	1295	0.779098	1.15478	0.461389	5.81315	5.01576	6.23864	3.20285e-16	3.09368	up
gene45762	3033	2567	2426	4102	4619	5632	30.7405	29.4247	25.9308	48.1067	51.9121	58.4558	0.00355717	1.24557	up
gene45773	490	419	491	962	1095	1029	4.89888	5.08387	5.64069	10.8253	11.996	10.232	7.78728e-05	1.55632	up
gene45807	1756	1629	1568	6409	11149	9677	16.3606	17.7798	15.591	68.0055	109.858	92.0794	3.0029e-08	2.87228	up
gene45821	3843	3336	3500	6710	5589	6376	17.2984	16.488	16.1306	38.5068	29.8169	31.7113	0.00673503	1.21628	up
gene45830	239	304	236	950	822	1112	1.37488	1.97786	1.429	6.33131	5.26901	6.55946	2.71149e-09	2.27784	up
gene45840	314	273	319	1111	1289	1653	2.81806	2.69771	2.98564	10.861	12.7261	14.543	4.06072e-12	2.56817	up
gene45847	1136	1082	1037	1586	1918	2717	6.68211	7.20272	6.43552	10.7988	12.5153	16.3746	0.000562515	1.33313	up
gene45860	1330	1008	1435	2239	2598	3017	5.42504	4.01944	5.33861	9.13851	10.1643	10.8964	0.000150507	1.47336	up
gene45915	3016	2313	3042	4499	7600	5081	7.86241	7.32714	8.33985	12.6803	23.0862	12.1184	0.00828631	1.4667	up
gene4592	1633	1060	1287	5827	8346	9049	13.6381	9.99872	11.3064	56.1034	77.0969	76.9395	1.64642e-13	2.96514	up
gene45946	8751	6536	7236	20346	18860	21315	79.1486	67.4014	70.6859	218.187	193.854	202.325	0.000181224	1.84122	up
gene45950	1436	1285	1004	150	228	303	16.5238	16.7348	12.1846	1.9854	2.89996	3.56643	1.55175e-07	-2.05182	down
gene45958	5273	5366	4720	9146	15211	17982	21.7036	24.193	26.2788	54.287	97.26	88.8424	0.000157345	1.86289	up
gene45960	911	736	837	2740	4080	3713	3.68771	3.36101	3.55945	12.8452	18.2382	15.4116	2.10495e-11	2.50222	up
gene46027	475	379	356	1020	2699	2009	3.07267	2.77415	2.43302	7.63779	19.4202	13.3586	0.00469808	2.66547	up
gene46036	1042	1007	1084	3493	4768	5139	7.42285	8.51313	8.35812	26.9462	33.0654	34.9829	3.7869e-11	2.50386	up
gene46054	253	122	116	390	521	755	2.75307	1.50126	1.33032	4.9062	6.28653	8.41784	2.69792e-05	2.18349	up
gene46057	1084	951	974	2196	3199	3780	9.31284	9.25856	9.23395	22.071	31.2722	38.9846	1.34745e-07	2.01523	up
gene46090	1470	1084	1181	2638	3129	5039	14.3322	11.9538	12.1443	29.753	33.8272	50.3105	0.000106649	1.93703	up
gene46091	36	41	58	365	1034	563	0.645613	0.843814	1.11458	7.75634	21.0973	10.6068	0.0010765	4.28735	up
gene4613	185	209	259	449	461	628	2.61737	3.46488	3.32121	7.9376	5.82603	9.22344	0.000344651	1.63476	up
gene4614	476	489	817	1179	2049	2158	3.85443	4.10398	6.33977	10.0998	17.2309	15.9766	7.45184e-05	2.00737	up
gene46174	11	9	5	137	439	160	0.10863	0.098156	0.045832	2.39011	7.80543	2.78166	0.00603856	5.31637	up
gene46231	22	31	21	136	293	541	0.3892	0.63036	0.400986	2.8823	5.93716	10.139	0.00244821	4.08327	up
gene46233	1121	985	1030	2498	3510	4298	5.4497	4.74172	5.85853	12.7356	18.1248	17.4376	2.09712e-08	2.12249	up
gene4625	211	103	195	2541	3102	2373	1.56757	0.670164	1.6963	23.4195	20.9608	19.3537	2.33641e-30	4.41831	up
gene46250	507	437	452	1482	1666	2154	13.9933	13.6331	13.1681	47.3647	51.0233	60.9374	1.61428e-10	2.33085	up
gene46288	192	194	184	608	1299	1075	2.17503	2.67615	1.98539	6.93167	13.884	13.4128	8.18588e-05	2.79889	up
gene46290	1983	1396	2083	4560	5750	6150	21.7747	17.3408	24.1269	57.9517	70.0378	69.1706	3.65593e-07	2.01177	up
gene46338	204	317	241	1405	1829	1054	2.40942	4.24988	3.0034	19.2554	24.0389	12.7811	8.89382e-07	2.89672	up
gene4636	278	331	412	1828	4230	2641	3.67751	5.01633	4.88154	28.1123	62.6209	36.6273	0.000263571	3.50974	up
gene46407	99	177	132	279	294	345	1.15956	2.40706	1.72544	3.45619	3.54835	3.78235	0.00508903	1.55194	up
gene46514	24	36	46	259	286	315	0.292247	0.499316	0.608389	3.75879	3.98287	4.05107	2.26152e-09	3.4185	up
gene46525	491	468	428	1671	2582	2710	4.09795	4.96423	3.99417	16.6642	29.5735	28.26	4.15651e-11	2.73405	up
gene46546	998	1095	868	1962	2675	1859	4.41249	5.63783	4.23033	10.3529	11.6633	8.58792	0.000120485	1.54482	up
gene46576	1540	1494	1503	2246	2462	2583	36.2756	39.4139	37.3754	55.7531	63.7754	60.7188	0.00892405	1.09191	up
gene46602	0	0	13	54	245	218	0	0	0.265626	0.883377	4.70947	5.51721	0.000228078	5.76099	up
gene46635	16	7	0	132	108	111	0.123662	0.056162	0	1.42359	1.05801	1.10105	1.84144e-08	4.36453	up
gene4672	190	229	208	22	40	28	1.31246	1.78388	1.51244	0.170303	0.301913	0.197488	0.000458118	-2.39011	down
gene46750	82	81	65	141	271	255	2.81652	3.16304	2.35512	5.62629	10.4108	9.05182	0.00148413	1.95529	up
gene46753	56	62	8	2631	1422	3530	1.26678	1.45092	0.144928	72.8227	36.2032	80.2279	1.5005e-13	6.27818	up
gene47023	67	8	33	1650	3179	2675	1.26155	0.163689	0.618977	36.261	66.9509	51.9992	2.1217e-17	6.59083	up
gene47096	234	137	168	360	349	541	5.90336	4.06667	4.25778	11.1608	10.0396	14.4647	0.0010842	1.62837	up
gene47116	84	63	43	231	278	398	1.73908	2.01442	0.779621	4.71775	4.97317	6.98261	1.30922e-06	2.65875	up
gene47209	78	51	21	186	372	323	4.05131	2.97129	1.07421	11.3773	21.389	17.4246	9.10325e-06	2.97464	up
gene4727	379	206	262	768	1551	1186	5.48214	3.50159	3.79739	12.0559	23.256	17.1461	0.000256917	2.48533	up
gene47288	87	70	55	612	748	1032	1.55923	1.4241	1.19208	14.0496	17.1174	22.3694	4.14066e-19	3.89924	up
gene4736	392	356	282	585	1091	877	1.75711	1.87854	1.37075	2.99494	5.24131	3.69342	0.00177758	1.7236	up
gene47415	0	4	3	88	108	80	0	0.168363	0.116181	3.91051	4.48484	3.08554	1.37348e-10	5.65986	up
gene4745	70	22	61	262	329	313	1.26503	0.4469	1.15314	5.50126	6.60979	5.80502	8.76506e-08	3.01059	up
gene47485	5	19	0	70	41	61	0.13997	0.711951	0	2.32653	1.71401	1.8805	0.000122376	3.16042	up
gene47555	8	8	4	38	61	124	0.125093	0.143225	0.073808	0.765269	1.18909	2.24934	0.00208608	3.85679	up
gene47747	0	4	0	458	1195	1028	0	0.067214	0	9.77538	24.5942	19.492	1.78272e-14	9.67635	up
gene4775	2966	2745	3103	4589	6099	6644	7.97459	8.32159	8.80855	14.2243	18.3222	18.5046	0.00112714	1.38444	up
gene478	1245	676	978	7133	22629	12771	36.9423	22.6958	30.6027	245.026	745.061	388.256	0.00194951	4.32113	up
gene47880	32	3	14	1071	619	1841	0.832451	0.06123	0.378091	33.0779	18.3145	50.3273	9.52791e-09	6.61676	up
gene47952	79	75	106	319	545	476	1.59627	1.71063	2.2693	7.50939	12.302	9.91173	3.20148e-08	2.78258	up
gene47953	97	56	181	365	680	414	1.31964	0.854828	2.5998	4.67237	10.3026	5.78281	0.000900012	2.57341	up
gene48010	320	365	141	1721	1247	2641	14.3454	19.0579	5.17557	89.8748	61.1978	125.728	2.7242e-07	3.13747	up
gene4810	140	103	150	783	675	512	1.5772	1.40212	1.80956	10.8021	9.07071	6.27892	1.21682e-10	2.75346	up
gene4811	266	352	332	1736	1656	1364	2.19284	3.18623	3.12389	16.6248	17.3727	13.8034	1.06586e-13	2.72752	up
gene48172	82	83	52	744	956	1313	2.18301	2.53397	1.46808	23.2235	29.5361	36.518	6.67765e-18	4.18807	up
gene48177	47	40	70	198	349	350	0.557008	0.524926	0.921417	2.84114	4.62847	3.67068	1.44675e-07	2.93253	up
gene48292	52	32	0	1663	839	1977	1.48959	1.08981	0	45.8944	22.529	48.1216	2.13323e-14	6.13356	up
gene48315	27	11	20	74	115	118	0.301045	0.134402	0.227919	0.96654	1.44104	1.36773	0.000208156	2.84211	up
gene48446	53	32	28	5076	8010	8879	0.441805	0.297265	0.241986	49.6079	75.0293	76.7942	2.30885e-37	8.02283	up
gene48449	143	203	134	1419	2072	2595	1.98925	3.2006	1.97498	22.9828	32.1578	37.1908	2.39415e-15	4.04834	up
gene48497	42	74	60	428	362	253	1.82763	3.65537	2.75005	21.7609	17.6804	11.4033	1.83881e-08	2.96399	up
gene48507	0	14	10	302	685	510	0	0.854539	0.530861	19.3269	42.0292	28.8684	1.24987e-10	6.31992	up
gene48606	749	1137	714	40755	73175	56986	6.60642	11.3414	6.6384	415.98	715.862	514.77	2.1524e-19	6.43338	up
gene4863	153	76	103	417	700	505	1.16154	0.655859	0.824492	3.68623	5.93005	3.94875	1.4348e-06	2.72954	up
gene4867	636	491	583	2531	2095	3357	3.33437	2.91191	3.2273	15.3857	12.198	18.0474	6.00941e-13	2.62863	up
gene4869	595	1115	1241	2759	2018	1976	5.43153	11.5187	11.9622	29.1909	20.4637	18.4978	2.32653e-05	1.58877	up
gene4874	1628	1982	2389	19130	26044	27306	15.9681	22.1187	25.0262	221.177	288.842	279.416	9.31018e-17	3.99796	up
gene48741	88	90	106	627	483	559	3.29797	3.0332	4.35085	27.8527	21.9548	22.3355	4.91162e-11	2.96132	up
gene48752	373	334	316	529	609	678	16.975	17.1886	15.1557	27.8847	30.7046	31.5501	0.00669732	1.2356	up
gene48846	342	295	279	799	865	1598	7.41625	7.92753	7.12132	19.1959	21.4454	33.9072	0.000332563	2.22663	up
gene49010	170	280	230	416	711	642	3.88153	7.25979	5.56395	11.024	18.0753	15.0892	0.000157936	1.77195	up
gene49128	45	112	62	216	372	659	0.730711	2.10535	1.15834	4.14706	7.1046	11.534	0.00461949	2.8625	up
gene49129	74	111	47	233	308	501	1.00962	2.07936	0.662077	3.8169	4.4555	5.41925	9.06325e-05	2.53555	up
gene492	725	581	601	1198	1203	1770	4.61289	4.17947	4.03699	8.82201	8.49671	11.5392	5.54669e-05	1.53376	up
gene4922	2082	1805	1651	216	394	480	14.6909	13.9986	11.5921	2.32569	4.05232	4.55396	2.13639e-07	-1.94052	down
gene49237	1	11	36	73	153	182	0.007103	0.088508	0.26941	0.607926	1.21699	1.33718	3.08588e-05	3.4888	up
gene49453	761	319	562	86	154	132	22.3979	9.89767	17.1686	3.0635	4.79598	3.82468	0.00374554	-1.69986	down
gene49478	4520	3108	3581	7390	8990	6404	100.517	72.8255	89.0341	171.163	202.628	158.986	0.00114095	1.45305	up
gene4948	4	10	17	1013	5335	1935	0.05376	0.174421	0.280571	18.6871	94.3359	31.5833	0.000993215	8.48925	up
gene49503	374	273	180	458	893	893	6.20556	5.11757	3.1507	8.79077	16.4611	15.1957	0.00193542	1.8542	up
gene49642	17	5	3	41	90	65	0.874097	0.247431	0.140202	2.48547	5.18946	3.48186	9.95979e-05	3.42937	up
gene4967	261	119	264	729	397	505	1.44889	0.763617	1.31626	4.2277	2.23156	2.61117	0.000996629	1.77341	up
gene49721	39	37	23	87	233	158	0.453469	0.475798	0.274171	1.1638	3.00277	1.87357	0.00814638	2.68675	up
gene49735	275	262	312	488	480	685	5.89845	6.35407	7.06288	12.1368	11.4435	15.0744	0.00291972	1.36311	up
gene4977	581	649	731	86	142	216	2.89202	3.51844	3.5181	1.26078	1.30846	1.27819	0.000195311	-1.7504	down
gene4982	445	385	239	1970	7728	5975	1.82768	1.76317	0.986308	12.7196	45.0111	39.7801	0.00163743	4.28885	up
gene4983	0	1	14	287	72	173	0	0.006927	0.092292	2.50224	0.818401	1.50491	0.000260657	5.56962	up
gene4997	0	11	10	4400	8071	10211	0	0.322731	0.285152	154.348	272.405	318.472	3.97765e-26	10.4275	up
gene5002	35	5	31	241	159	259	0.194545	0.026166	0.548685	1.58489	1.00477	1.50735	8.42953e-09	3.66455	up
gene5017	4171	3767	4065	14031	53739	40289	30.0384	30.6941	30.882	116.938	429.268	297.173	0.00670299	3.59011	up
gene50177	29	14	10	500	915	302	0.398958	0.206659	0.133347	8.0654	14.1414	4.30904	0.000160426	5.47563	up
gene50192	643	499	491	72	123	254	6.35504	5.57902	5.11298	0.858218	1.33907	2.57081	0.00462038	-1.47039	down
gene50225	155	83	96	166	258	353	3.52593	2.15294	2.2772	4.24117	6.37395	7.96411	0.00659106	1.63729	up
gene50233	321	429	304	1138	1503	888	3.0023	4.76044	3.39067	12.1189	16.6574	8.84953	7.30505e-05	2.15063	up
gene5028	278	317	153	748	1641	1162	2.08676	2.69818	1.20726	6.51312	13.7018	8.95889	0.00084619	2.65145	up
gene50319	48	63	80	15	6	6	0.574191	0.797549	0.996973	0.192376	0.133171	0.071315	0.00706836	-2.41675	down
gene50321	503	336	299	9477	14699	14968	4.83422	3.64387	2.77973	99.3717	144.01	139.769	6.42708e-28	5.52334	up
gene50400	124	47	91	9	0	0	2.81819	1.2109	2.19023	0.223945	0	0	7.92627e-07	-4.41654	down
gene5041	476	456	645	1260	1254	744	10.6054	13.6425	15.6933	36.0612	33.0922	17.4027	0.00433482	1.47257	up
gene50418	0	34	41	1186	814	1654	0	0.821822	0.963587	30.0351	19.4267	37.721	5.03591e-20	5.95902	up
gene50534	407	381	386	970	2235	2194	4.59963	4.77674	4.49176	15.2028	37.4766	35.2675	0.000574898	2.61079	up
gene5062	348	532	292	776	730	1003	2.32969	4.2952	2.26132	6.47105	6.13055	7.3565	0.000204712	1.47583	up
gene50635	2974	1439	1731	3101	5759	5267	52.7575	28.8949	35.4408	67.3992	125.528	99.5992	0.00333198	1.63591	up
gene50677	236	307	248	563	737	740	2.30957	3.3972	2.55772	6.37109	7.99588	7.41129	2.23123e-05	1.76325	up
gene5074	1257	1147	1341	3013	3335	4633	11.4203	12.5802	12.8897	29.4528	31.9548	40.4533	2.27415e-07	1.95515	up
gene5076	2189	1826	1089	19285	18209	14399	33.0683	31.2019	17.3369	337.11	305.083	222.756	1.69254e-16	3.7609	up
gene50813	1487	892	2229	4551	6368	6164	16.0475	10.8832	25.3863	56.8614	76.2582	68.1671	3.7018e-09	2.32147	up
gene50985	38	53	29	186	414	258	2.87041	4.47795	2.29895	16.3034	34.9	20.0242	0.000419278	3.2399	up
gene510	1053	863	848	1442	1328	1905	9.75759	6.14678	8.42541	16.0568	8.99767	15.8513	0.00384351	1.16279	up
gene5100	2581	3265	2736	5305	6896	8925	4.85942	6.18933	4.23224	11.3004	15.6902	16.3811	4.09733e-05	1.6901	up
gene51001	60	33	32	2481	7686	2731	1.61502	0.98662	0.890993	77.3133	229.621	75.3245	0.000302147	7.14444	up
gene51204	58	45	46	212	311	582	2.16288	1.82608	1.92604	9.55566	13.6051	24.3373	0.000691845	3.28717	up
gene51220	364	401	275	99	89	76	6.06437	7.74189	4.72544	1.7683	1.64151	1.29865	0.00903237	-1.57367	down
gene51248	69	58	59	2487	1258	3259	1.1628	1.10636	1.05126	49.1975	23.854	57.061	8.0304e-11	5.62688	up
gene51283	45	42	15	2622	871	2545	0.741194	0.781961	0.261702	52.0072	16.245	46.0621	1.47507e-08	6.26811	up
gene5134	656	651	333	1782	6161	4451	3.10783	3.44231	2.26729	9.0907	30.488	19.2507	0.00720138	3.32789	up
gene51344	0	17	20	42	44	52	0	0.651074	0.73932	1.70915	1.70242	1.86856	0.00951492	2.26358	up
gene5147	46	68	75	273	177	277	0.415631	0.68872	0.710527	2.8788	1.79743	2.74515	7.13671e-05	2.33212	up
gene51477	960	794	590	1220	1624	1696	15.2231	14.2376	9.86555	22.3891	28.5516	27.5368	0.000456647	1.36332	up
gene51545	5	0	3	130	246	73	0.103844	0	0.061474	3.53395	6.40374	1.75393	0.000190252	6.32029	up
gene51576	158	146	152	331	289	365	3.06699	3.20154	3.1	7.43648	6.2275	7.25448	0.00585565	1.51617	up
gene51727	423	433	307	929	1169	1222	17.4357	20.2031	13.3526	44.345	53.5171	51.6524	4.29839e-07	1.9149	up
gene51949	218	154	227	377	444	449	2.71784	2.45931	3.34626	5.70012	6.68886	7.82183	0.00281242	1.506	up
gene51968	7	11	22	69	39	65	0.366576	0.643323	1.21172	4.21253	2.27848	3.50834	0.00307685	2.51072	up
gene52009	0	14	10	321	685	530	0	0.475848	0.295609	11.4428	23.4136	16.7267	2.56101e-12	6.35588	up
gene52040	101	110	74	375	407	559	2.75874	3.39473	2.13332	11.8402	12.3186	15.6269	3.80214e-08	2.6257	up
gene52185	0	16	4	38	50	74	0	0.236136	0.044295	0.585412	1.03817	1.26079	6.33732e-05	3.32106	up
gene52206	33	31	22	65	88	145	2.87546	2.6814	1.74228	6.00622	9.48961	13.039	0.00472977	2.18373	up
gene52256	2018	2189	1955	325	489	439	42.7225	52.4384	43.6685	7.94217	11.4855	9.50821	3.61928e-07	-1.89156	down
gene52385	32	36	67	164	386	421	1.66103	1.97271	3.52094	9.49853	21.4051	21.5905	0.000138274	3.25619	up
gene52425	47	41	47	204	306	355	0.845803	0.821943	0.878999	4.24064	6.09184	6.52759	4.75785e-08	3.0884	up
gene52455	38	56	47	219	102	136	1.04368	1.72999	1.34467	6.96958	3.10426	3.82667	0.00356419	2.08596	up
gene52467	131	124	45	334	416	770	7.0107	7.4444	2.5184	20.9009	25.6732	42.5731	0.000489776	2.72288	up
gene52553	17	21	28	718	960	221	0.23122	0.317688	0.399381	11.5843	14.8416	3.155	0.000625501	5.28237	up
gene52578	102	94	90	640	824	873	1.82327	1.90738	1.69582	13.3224	16.448	16.0749	1.57213e-16	3.43856	up
gene52627	3	4	0	606	110	437	0.046379	0.056983	0	13.1354	2.17644	6.81334	1.59159e-05	7.71796	up
gene52640	60	13	43	171	158	141	1.26827	0.294305	0.945395	4.39496	3.75349	3.05608	0.000354592	2.47715	up
gene5265	918	833	966	2846	3684	4591	4.70504	4.60918	5.14117	14.3314	17.9541	20.7132	6.11198e-11	2.43908	up
gene5268	754	655	740	7652	6516	7662	10.4751	10.295	10.845	123.154	100.507	109.131	1.02336e-20	3.75444	up
gene5269	1722	1225	1567	2437	2164	2623	17.5344	14.5736	17.2595	28.8255	25.0359	27.6123	0.00922112	1.0946	up
gene52761	179	303	220	480	427	573	13.4591	25.816	17.493	41.9211	35.7263	44.2821	0.00165102	1.456	up
gene53009	80	144	72	422	473	808	0.83707	1.45312	0.900581	6.1838	7.41793	8.22018	8.2101e-07	2.88816	up
gene5306	1305	1018	948	1687	2163	2096	15.2653	13.7742	9.6052	19.9067	26.3621	22.7011	0.00130501	1.27794	up
gene53120	433	363	301	453	748	939	6.36823	7.3384	5.33914	6.68261	11.0212	11.0814	0.00854006	1.3681	up
gene53227	10	8	15	83	98	97	0.359941	0.351034	0.607504	3.79173	4.28753	3.88954	8.54192e-06	3.49598	up
gene53237	48	89	56	412	451	417	0.546831	1.14038	0.663829	5.44436	5.70887	4.86679	2.41096e-10	3.11371	up
gene53243	145	115	142	289	226	451	5.87663	4.20482	6.05815	11.6522	8.57928	17.1802	0.00225777	1.66422	up
gene53285	0	0	7	187	133	440	0	0	0.160371	4.80615	3.4397	11.1835	6.31422e-06	7.17624	up
gene53368	103	147	96	1022	3027	2351	2.21538	3.58234	2.16632	25.4732	72.3002	51.863	4.05748e-05	4.60673	up
gene53470	732	332	869	1755	3451	3760	14.3709	7.36243	12.2034	39.8926	64.2945	75.6026	6.51706e-05	2.64751	up
gene53507	46	38	101	331	785	560	0.734513	0.64294	1.65704	5.34399	10.022	7.10136	8.6963e-05	3.61306	up
gene53540	13	18	11	33	53	85	0.125508	0.203358	0.114635	0.38274	0.592177	0.874294	0.00451882	2.40117	up
gene5356	665	506	564	1526	2504	3294	2.49325	2.43719	2.64288	7.37333	11.9763	14.4184	2.62032e-05	2.48622	up
gene536	902	734	857	7902	14412	14917	4.63327	4.2713	4.63725	47.1474	82.4481	78.8187	9.18109e-12	4.31459	up
gene53662	373	338	232	571	1108	1206	6.03229	6.47557	3.91134	11.3629	19.8334	21.2146	0.000897292	2.01686	up
gene53700	88	84	124	420	765	658	0.891472	0.944374	1.33006	5.13486	9.68647	7.80712	1.05222e-07	3.05614	up
gene53718	724	521	647	817	1152	1094	26.4817	21.5599	24.9744	34.6038	46.7561	40.9821	0.00883616	1.11631	up
gene53720	45	40	40	7	10	0	1.59334	1.61417	1.48927	0.253338	0.397637	0	0.00850642	-2.42229	down
gene53771	110	66	30	1279	1236	2136	3.41063	2.28974	0.9541	46.0559	42.6534	68.0715	6.23894e-18	4.90297	up
gene5384	234	203	256	1091	673	2036	5.11883	5.02719	5.90093	27.6711	16.3705	45.7248	0.00505407	2.84229	up
gene5385	2966	2882	2746	718	583	843	10.8147	11.6754	10.2671	3.17219	2.47039	3.29259	2.60562e-05	-1.6039	down
gene5397	63	36	44	7	6	5	0.538194	0.347397	0.396095	0.060155	0.056823	0.035354	0.00523178	-2.55773	down
gene54056	39	75	71	193	215	328	1.01723	2.18853	1.95039	5.81044	6.20583	8.73698	4.64962e-05	2.36933	up
gene54107	151	83	98	295	147	349	4.42815	2.695	3.02616	10.0282	4.15685	10.561	0.00774172	1.66208	up
gene54179	222	418	196	5484	9770	3142	7.3269	15.6328	6.82946	210.077	358.706	106.497	0.000505304	4.86335	up
gene54198	321	146	280	1258	2303	1326	4.07469	2.09173	3.73999	18.481	32.4231	17.229	9.98768e-05	3.16066	up
gene5426	2373	1612	1840	70	178	132	27.882	21.4208	22.807	0.949183	2.31394	1.57706	1.24553e-20	-3.50872	down
gene5427	1250	1551	1536	2468	2334	2691	4.88795	5.40424	5.64688	8.47739	8.58766	9.17806	0.00327651	1.18668	up
gene54291	102	121	63	474	456	953	1.63511	2.64869	1.46216	10.649	9.72214	18.121	4.88455e-05	3.09266	up
gene5431	9069	9598	8007	2807	2031	2295	38.7925	46.4026	36.1303	13.9136	9.62354	10.0516	0.000458681	-1.50121	down
gene54323	13	0	0	3173	13331	4587	0.355418	0	0	130.734	532.822	168.675	1.55503e-05	11.1967	up
gene5440	27	25	6	430	561	634	0.333132	0.341482	0.078609	6.19565	7.75691	8.09055	2.04467e-24	5.20342	up
gene5442	102	94	91	403	225	553	0.74311	0.771478	0.701778	3.57259	1.87331	4.37605	0.00025951	2.42999	up
gene54493	75	26	38	107	148	240	1.09038	0.39061	0.716063	2.07145	4.14764	4.57883	0.00118761	2.26141	up
gene54538	20	16	19	66	98	137	1.09115	0.999782	1.07569	4.1832	6.20474	8.00675	0.000173452	2.85825	up
gene54557	91	73	86	157	314	272	1.46973	1.34165	1.46962	2.95305	5.66043	4.53597	0.000949782	1.99129	up
gene5456	282	153	158	45	20	37	3.39713	2.07899	2.01374	0.622226	0.262871	0.440068	0.00261376	-2.12274	down
gene5465	13	15	23	466	909	481	0.08416	0.151273	0.168132	5.37139	9.15089	4.7655	9.90335e-08	5.61236	up
gene54822	485	406	376	961	528	743	11.7793	10.4669	9.24164	26.073	11.8118	16.9728	0.00461253	1.22327	up
gene5491	926	849	1159	1529	2357	2056	8.84759	9.13994	11.566	16.7803	21.5391	17.4369	0.00020923	1.4356	up
gene5492	611	659	664	1207	1337	1980	6.21044	7.57826	7.11884	14.1945	15.0715	20.6219	1.41599e-05	1.62049	up
gene54940	51	20	18	68	87	135	0.752135	0.325669	0.271312	1.1505	1.422	2.03448	0.00742127	2.13044	up
gene55028	115	117	165	183	357	358	3.6015	4.16934	5.48703	6.67842	12.5059	11.6167	0.00591763	1.58843	up
gene5520	28	8	8	839	460	392	0.40899	0.209267	0.078186	17.0901	10.5361	7.7051	1.55645e-08	5.71907	up
gene55206	203	195	112	346	630	470	3.43691	3.74523	2.0092	6.76858	12.1206	8.28693	0.00100857	1.91453	up
gene5537	311	313	413	627	1047	964	2.99118	3.4495	4.19209	7.01874	11.5958	9.55687	4.46775e-05	1.76	up
gene55427	226	103	146	467	784	484	9.85336	5.25242	7.2337	23.4979	35.8368	19.9455	0.000440556	2.31688	up
gene5545	355	414	320	49	19	42	1.19476	1.57334	1.13557	0.188226	0.067915	0.142055	4.54518e-07	-2.92258	down
gene5547	2133	1302	1784	2910	3863	3463	9.45114	6.37831	8.44113	14.5651	18.8777	16.1446	0.000563503	1.40054	up
gene5548	2888	2571	2903	5839	8582	8435	23.9987	25.5358	37.483	59.2636	83.7438	77.5491	7.45942e-06	1.86346	up
gene55623	19	3	4	41	60	110	0.276827	0.042218	0.047784	0.700371	0.990488	1.66939	0.000581	3.46887	up
gene5588	148	110	139	416	1014	859	1.35342	1.05088	1.30353	4.44623	9.71989	7.54598	0.000431544	2.95095	up
gene5590	50	84	49	4542	18919	13479	0.80651	1.54905	0.835781	86.0417	343.497	225.976	7.61733e-07	8.05062	up
gene563	431	376	371	710	723	639	2.22508	2.18228	2.00284	4.24358	4.15111	3.38289	0.00551306	1.22995	up
gene5635	325	429	351	2497	6277	8090	1.77244	3.12845	1.82808	17.5201	44.8561	50.2906	4.31051e-05	4.31895	up
gene5671	427	230	968	9402	10105	7590	3.49839	2.05338	8.3528	87.7515	92.2055	64.2531	3.53315e-26	4.50288	up
gene570	8	11	13	38	52	44	0.034571	0.055395	0.062063	0.208571	0.277354	0.216511	0.00514755	2.47185	up
gene5727	123	189	137	19	5	13	0.863846	1.49439	0.951452	0.139978	0.029836	0.082651	2.19386e-05	-3.22582	down
gene5739	206	116	116	389	485	704	1.3709	0.670172	0.621601	2.44313	3.51199	3.89109	5.71248e-07	2.26493	up
gene5753	1585	1423	1457	2650	3354	4384	6.15515	6.25182	6.01413	11.9894	14.6227	17.579	2.67152e-05	1.62166	up
gene5756	79	79	77	666	2280	2151	1.07637	1.24046	1.13624	10.1877	33.6111	28.5936	8.05805e-05	4.84688	up
gene5801	1	2	4	32	33	68	0.001173	0.006894	0.018179	0.256311	0.261423	0.396333	1.45934e-06	4.6325	up
gene5807	671	655	768	1369	1977	2212	3.59248	5.56529	4.55273	8.53553	12.8552	12.1836	9.31806e-07	1.81509	up
gene5868	861	606	629	951	1134	1444	3.98694	3.1756	3.07227	5.09697	5.82437	6.8461	0.00462486	1.16411	up
gene5892	210	183	132	397	423	422	8.10295	7.99147	5.3796	17.7468	18.1075	16.7166	0.000877441	1.65137	up
gene5893	2080	2129	2421	2962	4371	5707	54.4936	63.0852	66.8908	89.7831	126.99	153.123	0.00176092	1.37617	up
gene5933	428	321	421	739	1001	1181	3.93645	3.3444	4.16138	8.5826	10.9282	11.6413	9.04613e-06	1.73426	up
gene5936	34	40	29	384	487	595	0.402272	0.523351	0.34275	5.54643	6.68154	7.5081	2.24014e-17	4.22373	up
gene5938	683	458	527	1445	1837	1241	7.61144	6.01731	5.70601	18.4983	22.3947	16.0587	3.99347e-06	1.87098	up
gene5944	1688	1093	1409	4079	5069	7844	4.72784	3.31617	3.99265	13.6964	17.7766	22.0305	2.47387e-06	2.43064	up
gene5946	126	87	114	593	993	1149	0.938419	0.999924	1.3648	5.76382	9.20556	9.23086	9.0785e-10	3.48102	up
gene5947	276	574	430	3360	6614	4291	1.41422	3.29569	2.06462	20.4857	39.0859	24.2298	1.44834e-06	3.87233	up
gene5948	4	5	7	128	86	64	0.0504	0.076027	0.168422	3.80524	2.4714	1.07528	3.37017e-08	4.53273	up
gene596	4071	5263	4759	138	104	126	33.5747	48.8651	41.1214	1.25459	1.01303	0.936321	4.16552e-32	-4.86443	down
gene5961	279	226	424	538	601	510	3.19015	2.91613	5.45626	7.11724	7.62631	5.97741	0.00853643	1.2531	up
gene5969	25	21	10	115	201	195	0.516325	0.49177	0.203921	2.83606	4.77896	4.27004	1.00245e-07	3.59718	up
[truncated: 499 more rows]
