# Supplementary material for: Innate and early immune responses to Yersinia ruckeri in the spleen of rainbow trout (Oncorhynchus mykiss)
Source: Research Square preprint supplement (doi:10.21203/rs.3.rs-219853/v1), 2021-02-23
Supplement: Supplementary file 3 [file 85c630359c122860fb99c4b8.xlsx]

## Sheet: Table S4
#ID	gene_name	Control1_FPKM	Control1_count	Control2_FPKM	Control2_count	Control3_FPKM	Control3_count	YR1_FPKM	YR1_count	YR2_FPKM	YR2_count	YR3_FPKM	YR3_count	FDR	log2FC	regulated	COG_class	COG_class_annotation	GO_annotation	KEGG_annotation	KEGG_pathway_annotation	KOG_class	KOG_class_annotation	Pfam_annotation	Swiss_Prot_annotation	eggNOG_class	eggNOG_class_annotation	NR_annotation	GO_second_level_annotation
gene14515	LOC110529980	35.7178	3417	27.3106	2309	38.4119	3484	173.811	14367	124.45	10733	109.796	10255	5.35895e-08	2.3661	up	--	--	Molecular Function: chemokine receptor activity (GO:0004950);; Molecular Function: scavenger receptor activity (GO:0005044);; Biological Process: receptor-mediated endocytosis (GO:0006898);; Biological Process: chemotaxis (GO:0006935);; Biological Process: G-protein coupled receptor signaling pathway (GO:0007186);; Cellular Component: integral component of membrane (GO:0016021);; Molecular Functi…	K04184|1.61251e-142|dre:553366|K04184 C-C chemokine receptor type 9 | (RefSeq) ccr9a, sb:eu630; chemokine (C-C motif) receptor 9a	Cytokine-cytokine receptor interaction (ko04060);; Intestinal immune network for IgA production (ko04672)	[R]	General function prediction only	7 transmembrane receptor (rhodopsin family)	C-X-C chemokine receptor type 4-B OS=Xenopus laevis OX=8355 GN=cxcr4-b PE=2 SV=1	U	Intracellular trafficking, secretion, and vesicular transport	C-C chemokine receptor type 9-like [Oncorhynchus kisutch]	biological process: cellular process (GO:0009987);; biological process: signaling (GO:0023052);; biological process: single-organism process (GO:0044699);; biological process: response to stimulus (GO:0050896);; biological process: biological regulation (GO:0065007);; molecular function: signal transducer activity (GO:0004871);; molecular function: molecular transducer activity (GO:0060089);; bio…
gene9354	jun	7.02275	621	7.0702	553	6.31524	530	43.4635	3321	38.3248	3055	33.6261	2903	1.04969e-14	2.85764	up	--	--	Molecular Function: core promoter proximal region DNA binding (GO:0001159);; Molecular Function: transcription factor activity, sequence-specific DNA binding (GO:0003700);; Cellular Component: nucleus (GO:0005634);; Biological Process: regulation of transcription, DNA-templated (GO:0006355);; Molecular Function: chromatin DNA binding (GO:0031490);; Molecular Function: sequence-specific DNA bindin…	K04448|1.6119e-177|mze:101472459|K04448 transcription factor AP-1 | (RefSeq) transcription factor AP-1-like	MAPK signaling pathway (ko04010);; ErbB signaling pathway (ko04012);; Apoptosis (ko04210);; Wnt signaling pathway (ko04310);; Focal adhesion (ko04510);; Toll-like receptor signaling pathway (ko04620);; GnRH signaling pathway (ko04912);; AGE-RAGE signaling pathway in diabetic complications (ko04933);; Salmonella infection (ko05132);; Herpes simplex infection (ko05168)	[K]	Transcription	Jun-like transcription factor;; bZIP transcription factor;; bZIP Maf transcription factor;; Basic region leucine zipper	Transcription factor AP-1 OS=Serinus canaria OX=9135 GN=JUN PE=2 SV=1	K	Transcription	transcription factor AP-1 [Oncorhynchus mykiss]	molecular function: binding (GO:0005488);; biological process: biological regulation (GO:0065007);; molecular function: nucleic acid binding transcription factor activity (GO:0001071);; cellular component: cell (GO:0005623);; cellular component: organelle (GO:0043226);; cellular component: cell part (GO:0044464)
gene25622	il-6	0.367986	19	0.162932	8	0.356193	17	132.358	5641	359.759	15996	320.018	15410	4.96676e-15	10.1563	up	--	--	Molecular Function: cytokine activity (GO:0005125);; Molecular Function: interleukin-6 receptor binding (GO:0005138);; Cellular Component: extracellular space (GO:0005615);; Biological Process: acute-phase response (GO:0006953);; Molecular Function: growth factor activity (GO:0008083);; Biological Process: positive regulation of gene expression (GO:0010628);; Biological Process: negative regulati…	K05405|3.28291e-19|tru:503562|K05405 interleukin 6 | (RefSeq) il-6, il6; interleukin-6	Cytokine-cytokine receptor interaction (ko04060);; FoxO signaling pathway (ko04068);; Toll-like receptor signaling pathway (ko04620);; NOD-like receptor signaling pathway (ko04621);; Cytosolic DNA-sensing pathway (ko04623);; Intestinal immune network for IgA production (ko04672);; AGE-RAGE signaling pathway in diabetic complications (ko04933);; Salmonella infection (ko05132);; Herpes simplex infe…	--	--	Interleukin-6/G-CSF/MGF family	Interleukin-6 OS=Oncorhynchus mykiss OX=8022 GN=il6 PE=2 SV=1	S	Function unknown	unnamed protein product [Oncorhynchus mykiss]	molecular function: binding (GO:0005488);; cellular component: extracellular region (GO:0005576);; cellular component: extracellular region part (GO:0044421);; biological process: response to stimulus (GO:0050896);; biological process: biological regulation (GO:0065007);; biological process: single-organism process (GO:0044699);; biological process: cellular process (GO:0009987);; biological proc…
gene19781	LOC110535743	20.5151	2029	19.2177	1686	13.9014	1272	3.93289	329	5.87701	524	6.18252	577	0.000379516	-1.39451	down	--	--	Biological Process: regulation of apoptotic process (GO:0042981);;	K12794|0|dre:796425|K12794 caspase recruitment domain-containing protein 9 | (RefSeq) card9, si:dkey-1o2.6; caspase recruitment domain family, member 9	NOD-like receptor signaling pathway (ko04621)	--	--	Caspase recruitment domain	--	S	Function unknown	caspase recruitment domain-containing protein 9-like [Oncorhynchus mykiss]	biological process: biological regulation (GO:0065007)
gene17469	LOC110533322	0.891578	107	0.825997	86	0.750567	85	9.5768	829	13.4711	1291	6.4146	619	2.25611e-05	3.73349	up	--	--	Molecular Function: cytokine receptor activity (GO:0004896);; Molecular Function: cytokine activity (GO:0005125);; Cellular Component: extracellular space (GO:0005615);; Biological Process: cytokine-mediated signaling pathway (GO:0019221);;	K05425|2.97086e-63|xma:102226505|K05425 interleukin 12B | (RefSeq) interleukin-12 subunit beta-like	Cytokine-cytokine receptor interaction (ko04060);; Toll-like receptor signaling pathway (ko04620);; RIG-I-like receptor signaling pathway (ko04622);; Herpes simplex infection (ko05168)	--	--	Cytokine interleukin-12p40 C-terminus	--	O	Posttranslational modification, protein turnover, chaperones	interleukin-12 subunit beta-like [Oncorhynchus mykiss]	biological process: cellular process (GO:0009987);; biological process: signaling (GO:0023052);; biological process: single-organism process (GO:0044699);; biological process: response to stimulus (GO:0050896);; biological process: biological regulation (GO:0065007);; molecular function: signal transducer activity (GO:0004871);; molecular function: molecular transducer activity (GO:0060089);; mol…
Oncorhynchus_mykiss_newGene_11460	--	25.285	1355	14.5941	692	16.9663	862	45.3351	2004	76.1181	3677	63.5569	3324	0.000138013	2.06362	up	--	--	Molecular Function: zinc ion binding (GO:0008270);; Biological Process: regulation of apoptotic process (GO:0042981);;	K16060|1.21525e-28|xma:102228638|K16060 baculoviral IAP repeat-containing protein 2/3 | (RefSeq) birc2; baculoviral IAP repeat containing 2	Ubiquitin mediated proteolysis (ko04120);; Apoptosis (ko04210);; Focal adhesion (ko04510);; NOD-like receptor signaling pathway (ko04621)	[DR]	Cell cycle control, cell division, chromosome partitioning;; General function prediction only	Inhibitor of Apoptosis domain	Inhibitor of apoptosis protein OS=Gallus gallus OX=9031 GN=ITA PE=2 SV=1	O	Posttranslational modification, protein turnover, chaperones	inhibitor of apoptosis protein-like [Oncorhynchus mykiss]	molecular function: binding (GO:0005488);; biological process: biological regulation (GO:0065007)
gene44875	LOC110508625	5.95063	1259	5.45474	965	8.06509	1118	9.23838	1902	9.07719	2019	8.37437	1962	0.00216618	1.2343	up	[T]	Signal transduction mechanisms	Molecular Function: protein kinase activity (GO:0004672);; Molecular Function: ATP binding (GO:0005524);; Biological Process: protein phosphorylation (GO:0006468);; Biological Process: signal transduction (GO:0007165);;	K02861|0|mze:101477700|K02861 receptor-interacting serine/threonine-protein kinase 1 [EC:2.7.11.1] | (RefSeq) ripk1; receptor interacting serine/threonine kinase 1	Apoptosis (ko04210);; Toll-like receptor signaling pathway (ko04620);; RIG-I-like receptor signaling pathway (ko04622);; Cytosolic DNA-sensing pathway (ko04623)	[T]	Signal transduction mechanisms	Protein kinase domain;; Protein tyrosine kinase;; Death domain;; RIP homotypic interaction motif	Tyrosine-protein kinase Fyn OS=Xenopus laevis OX=8355 GN=fyn PE=2 SV=3	T	Signal transduction mechanisms	receptor-interacting serine/threonine-protein kinase 1-like isoform X2 [Oncorhynchus mykiss]	biological process: metabolic process (GO:0008152);; biological process: cellular process (GO:0009987);; molecular function: catalytic activity (GO:0003824);; molecular function: binding (GO:0005488);; biological process: biological regulation (GO:0065007)
gene34157	LOC110496949	0.115604	9	0.173685	13	0.194307	15	66.1372	4281	50.8998	3443	94.303	6901	2.94983e-29	9.00842	up	--	--	Molecular Function: cytokine activity (GO:0005125);; Molecular Function: interleukin-6 receptor binding (GO:0005138);; Cellular Component: extracellular space (GO:0005615);; Biological Process: acute-phase response (GO:0006953);; Molecular Function: growth factor activity (GO:0008083);; Biological Process: positive regulation of gene expression (GO:0010628);; Biological Process: negative regulati…	K05405|3.06175e-21|ola:101165901|K05405 interleukin 6 | (RefSeq) interleukin-6-like	Cytokine-cytokine receptor interaction (ko04060);; FoxO signaling pathway (ko04068);; Toll-like receptor signaling pathway (ko04620);; NOD-like receptor signaling pathway (ko04621);; Cytosolic DNA-sensing pathway (ko04623);; Intestinal immune network for IgA production (ko04672);; AGE-RAGE signaling pathway in diabetic complications (ko04933);; Salmonella infection (ko05132);; Herpes simplex infe…	--	--	Interleukin-6/G-CSF/MGF family	Interleukin-6 OS=Oncorhynchus mykiss OX=8022 GN=il6 PE=2 SV=1	S	Function unknown	unnamed protein product [Oncorhynchus mykiss]	molecular function: binding (GO:0005488);; cellular component: extracellular region (GO:0005576);; cellular component: extracellular region part (GO:0044421);; biological process: response to stimulus (GO:0050896);; biological process: biological regulation (GO:0065007);; biological process: single-organism process (GO:0044699);; biological process: cellular process (GO:0009987);; biological proc…
gene38528	LOC110501503	8.936	762	8.30659	567	8.55622	552	20.4218	1460	35.7132	2491	26.2327	2120	8.38673e-06	2.11158	up	--	--	--	K12650|4.76058e-86|ola:101174711|K12650 TRAF family member-associated NF-kappa-B activator | (RefSeq) tank; TRAF family member associated NFKB activator	RIG-I-like receptor signaling pathway (ko04622)	--	--	TBD domain	--	S	Function unknown	LOW QUALITY PROTEIN: TRAF family member-associated NF-kappa-B activator-like [Oncorhynchus mykiss]	--
gene8351	LOC110523569	13.6411	2552	11.3271	2060	14.0863	2751	54.4647	9186	96.0476	17316	63.2228	12557	1.41949e-05	2.83331	up	--	--	Biological Process: signal transduction (GO:0007165);; Molecular Function: zinc ion binding (GO:0008270);; Biological Process: regulation of apoptotic process (GO:0042981);;	K03173|0|xma:102233408|K03173 TNF receptor-associated factor 2 [EC:2.3.2.27] | (RefSeq) traf2; TNF receptor associated factor 2	MAPK signaling pathway (ko04010);; Protein processing in endoplasmic reticulum (ko04141);; Apoptosis (ko04210);; RIG-I-like receptor signaling pathway (ko04622);; Adipocytokine signaling pathway (ko04920);; Herpes simplex infection (ko05168)	[T]	Signal transduction mechanisms	TNF receptor-associated factor BIRC3 binding domain;; TRAF-type zinc finger	TNF receptor-associated factor 6 OS=Danio rerio OX=7955 GN=traf6 PE=2 SV=2	S	Function unknown	TNF receptor-associated factor 2-like isoform X1 [Oncorhynchus mykiss]	biological process: cellular process (GO:0009987);; biological process: biological regulation (GO:0065007);; molecular function: binding (GO:0005488)
gene14361	LOC110529844	3.14535	362	2.4497	249	2.26436	247	23.3272	2315	38.9576	4033	28.4464	3189	5.39851e-11	3.90052	up	[O]	Posttranslational modification, protein turnover, chaperones	Molecular Function: ATP binding (GO:0005524);; Cellular Component: nucleus (GO:0005634);; Cellular Component: cytoplasm (GO:0005737);; Biological Process: protein folding (GO:0006457);; Biological Process: response to heat (GO:0009408);; Biological Process: response to cold (GO:0009409);; Biological Process: response to antibiotic (GO:0046677);; Molecular Function: unfolded protein binding (GO:00…	K04079|0|mze:101474541|K04079 molecular chaperone HtpG | (RefSeq) heat shock protein HSP 90-alpha	Protein processing in endoplasmic reticulum (ko04141);; NOD-like receptor signaling pathway (ko04621);; Progesterone-mediated oocyte maturation (ko04914)	[O]	Posttranslational modification, protein turnover, chaperones	Hsp90 protein;; Histidine kinase-, DNA gyrase B-, and HSP90-like ATPase;; Histidine kinase-, DNA gyrase B-, and HSP90-like ATPase	Heat shock protein HSP 90-alpha 1 OS=Danio rerio OX=7955 GN=hsp90a.1 PE=1 SV=3	O	Posttranslational modification, protein turnover, chaperones	heat shock protein HSP 90-alpha-like [Oncorhynchus mykiss]	molecular function: binding (GO:0005488);; cellular component: cell (GO:0005623);; cellular component: organelle (GO:0043226);; cellular component: cell part (GO:0044464);; biological process: cellular process (GO:0009987);; biological process: response to stimulus (GO:0050896)
gene6585	LOC110521616	0	0	0.671319	52	1.04321	85	2.98966	219	2.4645	190	3.40674	279	5.77806e-06	2.70039	up	--	--	Molecular Function: core promoter proximal region DNA binding (GO:0001159);; Molecular Function: transcription factor activity, sequence-specific DNA binding (GO:0003700);; Cellular Component: nucleus (GO:0005634);; Biological Process: regulation of transcription, DNA-templated (GO:0006355);; Molecular Function: chromatin DNA binding (GO:0031490);; Molecular Function: sequence-specific DNA bindin…	K04448|7.59703e-157|tru:101077059|K04448 transcription factor AP-1 | (RefSeq) c-jun; transcription factor AP-1	MAPK signaling pathway (ko04010);; ErbB signaling pathway (ko04012);; Apoptosis (ko04210);; Wnt signaling pathway (ko04310);; Focal adhesion (ko04510);; Toll-like receptor signaling pathway (ko04620);; GnRH signaling pathway (ko04912);; AGE-RAGE signaling pathway in diabetic complications (ko04933);; Salmonella infection (ko05132);; Herpes simplex infection (ko05168)	[K]	Transcription	Jun-like transcription factor;; bZIP transcription factor;; bZIP Maf transcription factor;; Basic region leucine zipper	Transcription factor AP-1 OS=Serinus canaria OX=9135 GN=JUN PE=2 SV=1	K	Transcription	transcription factor AP-1-like isoform X1 [Oncorhynchus mykiss]	molecular function: binding (GO:0005488);; biological process: biological regulation (GO:0065007);; molecular function: nucleic acid binding transcription factor activity (GO:0001071);; cellular component: cell (GO:0005623);; cellular component: organelle (GO:0043226);; cellular component: cell part (GO:0044464)
gene19936	LOC110535881	0.357689	57	0.440651	69	0.447036	57	5.77032	814	9.08402	1311	8.94912	1437	1.22443e-17	4.6788	up	--	--	--	K03156|2.95024e-19|mze:101467886|K03156 tumor necrosis factor superfamily, member 2 | (RefSeq) lymphotoxin-alpha-like	MAPK signaling pathway (ko04010);; Cytokine-cytokine receptor interaction (ko04060);; mTOR signaling pathway (ko04150);; Apoptosis (ko04210);; TGF-beta signaling pathway (ko04350);; Toll-like receptor signaling pathway (ko04620);; NOD-like receptor signaling pathway (ko04621);; RIG-I-like receptor signaling pathway (ko04622);; Adipocytokine signaling pathway (ko04920);; AGE-RAGE signaling pathway…	--	--	TNF(Tumour Necrosis Factor) family	--	S	Function unknown	tumor necrosis factor ligand superfamily member 6-like [Oncorhynchus mykiss]	--
gene43120	LOC110506735	5.63535	1102	4.97212	884	5.45593	1012	9.08574	1584	11.2108	2015	11.7347	2210	0.00044342	1.36755	up	--	--	Biological Process: ubiquitin-dependent protein catabolic process (GO:0006511);; Biological Process: protein deubiquitination (GO:0016579);; Molecular Function: thiol-dependent ubiquitinyl hydrolase activity (GO:0036459);;	K08601|0|mze:101478898|K08601 ubiquitin thioesterase [EC:3.4.19.12] | (RefSeq) cyld; CYLD lysine 63 deubiquitinase	RIG-I-like receptor signaling pathway (ko04622)	[R]	General function prediction only	Phosphorylation region of CYLD, unstructured;; CAP-Gly domain;; Ubiquitin carboxyl-terminal hydrolase	--	O	Posttranslational modification, protein turnover, chaperones	ubiquitin carboxyl-terminal hydrolase CYLD-like isoform X1 [Oncorhynchus mykiss]	biological process: metabolic process (GO:0008152);; biological process: cellular process (GO:0009987);; molecular function: catalytic activity (GO:0003824)
gene25550	LOC110487867	1.11694	72	0.885732	51	1.07366	66	37.6576	2087	104.108	6017	29.5009	1847	0.00223523	6.16993	up	--	--	Molecular Function: cytokine activity (GO:0005125);; Molecular Function: tumor necrosis factor receptor binding (GO:0005164);; Cellular Component: extracellular space (GO:0005615);; Biological Process: immune response (GO:0006955);; Cellular Component: integral component of membrane (GO:0016021);;	K03156|1.4434e-15|tru:654303|K03156 tumor necrosis factor superfamily, member 2 | (RefSeq) tnfa; tumor necrosis factor alpha	MAPK signaling pathway (ko04010);; Cytokine-cytokine receptor interaction (ko04060);; mTOR signaling pathway (ko04150);; Apoptosis (ko04210);; TGF-beta signaling pathway (ko04350);; Toll-like receptor signaling pathway (ko04620);; NOD-like receptor signaling pathway (ko04621);; RIG-I-like receptor signaling pathway (ko04622);; Adipocytokine signaling pathway (ko04920);; AGE-RAGE signaling pathway…	--	--	--	Tumor necrosis factor OS=Sparus aurata OX=8175 GN=tnf PE=3 SV=1	T	Signal transduction mechanisms	TNF-alpha3 isoform-2 [Oncorhynchus mykiss]	molecular function: binding (GO:0005488);; cellular component: extracellular region (GO:0005576);; cellular component: extracellular region part (GO:0044421);; biological process: immune system process (GO:0002376);; biological process: response to stimulus (GO:0050896);; cellular component: membrane (GO:0016020);; cellular component: membrane part (GO:0044425)
gene41139	LOC110504688	4.20906	515	2.51301	199	2.92266	378	10.3792	1319	8.80497	1015	10.1739	1474	2.96008e-09	2.23411	up	--	--	Biological Process: activation of innate immune response (GO:0002218);; Cellular Component: integral component of membrane (GO:0016021);; Biological Process: positive regulation of type I interferon production (GO:0032481);;	K12654|3.19683e-143|mze:101472581|K12654 transmembrane protein 173 | (RefSeq) tmem173; stimulator of interferon genes protein	RIG-I-like receptor signaling pathway (ko04622);; Cytosolic DNA-sensing pathway (ko04623)	--	--	Transmembrane protein 173	Stimulator of interferon genes protein OS=Xenopus tropicalis OX=8364 GN=tmem173 PE=2 SV=1	S	Function unknown	unnamed protein product [Oncorhynchus mykiss]	biological process: immune system process (GO:0002376);; biological process: biological regulation (GO:0065007);; cellular component: membrane (GO:0016020);; cellular component: membrane part (GO:0044425)
gene21635	LOC110537686	6.18963	833	4.10134	480	5.02716	798	9.12054	1189	7.32603	1045	12.0297	1702	0.000883571	1.31499	up	--	--	Biological Process: antigen processing and presentation of peptide or polysaccharide antigen via MHC class II (GO:0002504);; Biological Process: immune response (GO:0006955);; Cellular Component: integral component of membrane (GO:0016021);; Cellular Component: MHC class II protein complex (GO:0042613);;	K06752|3.58735e-48|ola:101156391|K06752 major histocompatibility complex, class II | (RefSeq) Orla-DCB; H-2 class II histocompatibility antigen, E-S beta chain	Phagosome (ko04145);; Cell adhesion molecules (CAMs) (ko04514);; Intestinal immune network for IgA production (ko04672);; Herpes simplex infection (ko05168)	--	--	Immunoglobulin C1-set domain;; Class II histocompatibility antigen, beta domain;; CD80-like C2-set immunoglobulin domain	Class II histocompatibility antigen, B-L beta chain (Fragment) OS=Gallus gallus OX=9031 PE=3 SV=1	U	Intracellular trafficking, secretion, and vesicular transport	HLA class II histocompatibility antigen, DQ beta 1 chain-like isoform X1 [Oncorhynchus mykiss]	biological process: immune system process (GO:0002376);; biological process: response to stimulus (GO:0050896);; cellular component: membrane (GO:0016020);; cellular component: membrane part (GO:0044425);; cellular component: cell (GO:0005623);; cellular component: macromolecular complex (GO:0032991);; cellular component: cell part (GO:0044464)
gene39898	LOC110502983	10.665	1716	9.81506	1393	10.0761	1530	49.2455	6812	98.6617	14289	45.5923	8835	0.000288418	3.11836	up	--	--	Molecular Function: DNA binding (GO:0003677);; Molecular Function: zinc ion binding (GO:0008270);; Biological Process: protein ubiquitination (GO:0016567);; Biological Process: protein deubiquitination (GO:0016579);;	K11859|0|dre:564497|K11859 tumor necrosis factor, alpha-induced protein 3 [EC:3.4.19.12] | (RefSeq) tnfaip3, si:ch211-274c22.6; tumor necrosis factor, alpha-induced protein 3	NOD-like receptor signaling pathway (ko04621)	[T]	Signal transduction mechanisms	A20-like zinc finger;; OTU-like cysteine protease	Ubiquitin thioesterase zranb1-B OS=Xenopus laevis OX=8355 GN=zranb1-b PE=2 SV=1	O	Posttranslational modification, protein turnover, chaperones	tumor necrosis factor alpha-induced protein 3-like [Oncorhynchus mykiss]	molecular function: binding (GO:0005488);; biological process: metabolic process (GO:0008152);; biological process: cellular process (GO:0009987)
gene41059	LOC110504616	0.239392	19	0.221837	16	0.266014	18	0.987821	52	2.00684	127	2.11766	125	0.000528411	2.93382	up	--	--	Molecular Function: cytokine receptor activity (GO:0004896);; Molecular Function: cytokine activity (GO:0005125);; Cellular Component: extracellular space (GO:0005615);; Biological Process: cytokine-mediated signaling pathway (GO:0019221);;	K05425|1.69591e-79|xma:102220488|K05425 interleukin 12B | (RefSeq) interleukin-12 subunit beta-like	Cytokine-cytokine receptor interaction (ko04060);; Toll-like receptor signaling pathway (ko04620);; RIG-I-like receptor signaling pathway (ko04622);; Herpes simplex infection (ko05168)	--	--	Cytokine interleukin-12p40 C-terminus	--	O	Posttranslational modification, protein turnover, chaperones	interleukin-12 subunit beta-like [Oncorhynchus mykiss]	biological process: cellular process (GO:0009987);; biological process: signaling (GO:0023052);; biological process: single-organism process (GO:0044699);; biological process: response to stimulus (GO:0050896);; biological process: biological regulation (GO:0065007);; molecular function: signal transducer activity (GO:0004871);; molecular function: molecular transducer activity (GO:0060089);; mol…
gene16995	LOC101268951	46.9547	2912	31.4063	1722	48.2924	2839	154.386	8273	196.005	10959	184.418	11166	7.04137e-09	2.45153	up	--	--	Molecular Function: transmembrane signaling receptor activity (GO:0004888);; Biological Process: apoptotic process (GO:0006915);; Biological Process: immune response (GO:0006955);; Biological Process: signal transduction (GO:0007165);; Cellular Component: integral component of membrane (GO:0016021);;	K03160|1.53999e-46|ola:100301586|K03160 tumor necrosis factor receptor superfamily member 5 | (RefSeq) CD40	Cytokine-cytokine receptor interaction (ko04060);; Cell adhesion molecules (CAMs) (ko04514);; Toll-like receptor signaling pathway (ko04620);; Intestinal immune network for IgA production (ko04672)	--	--	TNFR/NGFR cysteine-rich region	--	U	Intracellular trafficking, secretion, and vesicular transport	tumor necrosis factor receptor superfamily member 5 [Oncorhynchus mykiss]	biological process: cellular process (GO:0009987);; biological process: signaling (GO:0023052);; biological process: single-organism process (GO:0044699);; biological process: response to stimulus (GO:0050896);; biological process: biological regulation (GO:0065007);; molecular function: signal transducer activity (GO:0004871);; molecular function: molecular transducer activity (GO:0060089);; bio…
gene10827	il12b	6.65043	224	7.73004	230	5.71852	183	17.7114	515	21.7067	658	20.2205	664	6.51717e-06	1.93172	up	--	--	Molecular Function: cytokine receptor activity (GO:0004896);; Molecular Function: cytokine activity (GO:0005125);; Cellular Component: extracellular space (GO:0005615);; Biological Process: cytokine-mediated signaling pathway (GO:0019221);;	K05425|3.44744e-69|mze:101481035|K05425 interleukin 12B | (RefSeq) interleukin-12 subunit beta-like	Cytokine-cytokine receptor interaction (ko04060);; Toll-like receptor signaling pathway (ko04620);; RIG-I-like receptor signaling pathway (ko04622);; Herpes simplex infection (ko05168)	--	--	Cytokine interleukin-12p40 C-terminus	--	A	RNA processing and modification	interleukin-12 beta chain [Oncorhynchus mykiss]	biological process: cellular process (GO:0009987);; biological process: signaling (GO:0023052);; biological process: single-organism process (GO:0044699);; biological process: response to stimulus (GO:0050896);; biological process: biological regulation (GO:0065007);; molecular function: signal transducer activity (GO:0004871);; molecular function: molecular transducer activity (GO:0060089);; mol…
gene44718	casp8	3.94966	710	4.45012	735	5.46035	842	20.4654	3298	30.7874	4485	27.1622	4704	3.0342e-14	2.85572	up	--	--	Molecular Function: cysteine-type endopeptidase activity (GO:0004197);; Biological Process: proteolysis (GO:0006508);; Biological Process: regulation of apoptotic process (GO:0042981);;	K04398|2.16178e-143|mze:101475706|K04398 caspase 8 [EC:3.4.22.61] | (RefSeq) caspase-8	p53 signaling pathway (ko04115);; Apoptosis (ko04210);; Toll-like receptor signaling pathway (ko04620);; NOD-like receptor signaling pathway (ko04621);; RIG-I-like receptor signaling pathway (ko04622);; Herpes simplex infection (ko05168)	[D]	Cell cycle control, cell division, chromosome partitioning	Caspase domain;; Death effector domain	Caspase-3 OS=Xenopus laevis OX=8355 GN=casp3 PE=2 SV=1	O	Posttranslational modification, protein turnover, chaperones	caspase 8 [Oncorhynchus mykiss]	biological process: metabolic process (GO:0008152);; molecular function: catalytic activity (GO:0003824);; biological process: biological regulation (GO:0065007)
gene45821	LOC110509692	17.2984	3843	16.488	3336	16.1306	3500	38.5068	6710	29.8169	5589	31.7113	6376	0.00673503	1.21628	up	--	--	--	K02649|0|tru:101062512|K02649 phosphoinositide-3-kinase regulatory subunit alpha/beta/delta | (RefSeq) phosphatidylinositol 3-kinase regulatory subunit alpha-like	ErbB signaling pathway (ko04012);; FoxO signaling pathway (ko04068);; Phosphatidylinositol signaling system (ko04070);; mTOR signaling pathway (ko04150);; Apoptosis (ko04210);; Adrenergic signaling in cardiomyocytes (ko04261);; VEGF signaling pathway (ko04370);; Focal adhesion (ko04510);; Toll-like receptor signaling pathway (ko04620);; Regulation of actin cytoskeleton (ko04810);; Insulin signali…	[T]	Signal transduction mechanisms	Phosphatidylinositol 3-kinase regulatory subunit P85 inter-SH2 domain;; SH2 domain;; RhoGAP domain;; Variant SH3 domain	Phosphatidylinositol 3-kinase regulatory subunit alpha OS=Xenopus laevis OX=8355 GN=pik3r1-a PE=2 SV=1	T	Signal transduction mechanisms	phosphatidylinositol 3-kinase regulatory subunit alpha-like isoform X1 [Oncorhynchus mykiss]	--
gene5944	LOC110520638	4.72784	1688	3.31617	1093	3.99265	1409	13.6964	4079	17.7766	5069	22.0305	7844	2.47387e-06	2.43064	up	--	--	Cellular Component: integral component of membrane (GO:0016021);;	K05131|2.75127e-45|mze:101480583|K05131 interferon receptor 2 | (RefSeq) interferon alpha/beta receptor 2-like	Cytokine-cytokine receptor interaction (ko04060);; Toll-like receptor signaling pathway (ko04620);; Herpes simplex infection (ko05168)	--	--	Tissue factor;; Interferon-alpha/beta receptor, fibronectin type III	Interferon alpha/beta receptor 2 OS=Oncorhynchus mykiss OX=8022 GN=ifnar2 PE=2 SV=1	U	Intracellular trafficking, secretion, and vesicular transport	interferon lambda receptor 1-like [Oncorhynchus mykiss]	cellular component: membrane (GO:0016020);; cellular component: membrane part (GO:0044425)
gene22147	LOC110538043	0.602356	30	0.202924	11	0.296831	17	3.93912	150	3.47244	145	5.2154	228	9.70775e-08	3.60268	up	--	--	Biological Process: positive regulation of protein phosphorylation (GO:0001934);; Molecular Function: cytokine activity (GO:0005125);; Molecular Function: cytokine receptor binding (GO:0005126);; Cellular Component: extracellular space (GO:0005615);; Cellular Component: cytosol (GO:0005829);; Biological Process: positive regulation of gene expression (GO:0010628);; Biological Process: negative re…	K05414|2.027e-30|dre:360134|K05414 interferon alpha | (RefSeq) ifnphi1, ifn, ifn1; interferon phi 1	Cytokine-cytokine receptor interaction (ko04060);; Regulation of autophagy (ko04140);; Toll-like receptor signaling pathway (ko04620);; RIG-I-like receptor signaling pathway (ko04622);; Cytosolic DNA-sensing pathway (ko04623);; Herpes simplex infection (ko05168)	--	--	Interferon alpha/beta domain	Interferon a3 OS=Oncorhynchus mykiss OX=8022 GN=ifna3 PE=2 SV=1	S	Function unknown	interferon a3-like [Salvelinus alpinus]	biological process: biological regulation (GO:0065007);; molecular function: binding (GO:0005488);; cellular component: extracellular region (GO:0005576);; cellular component: extracellular region part (GO:0044421);; cellular component: cell (GO:0005623);; cellular component: cell part (GO:0044464);; biological process: immune system process (GO:0002376);; biological process: response to stimulus…
gene20759	LOC110536876	1.14185	137	1.22021	119	0.837984	94	11.5125	1256	27.3965	2377	16.8833	1787	7.58832e-10	4.37035	up	--	--	Molecular Function: transcription factor activity, sequence-specific DNA binding (GO:0003700);; Biological Process: regulation of transcription, DNA-templated (GO:0006355);; Molecular Function: sequence-specific DNA binding (GO:0043565);;	K04448|7.52417e-126|mze:101463670|K04448 transcription factor AP-1 | (RefSeq) transcription factor AP-1-like	MAPK signaling pathway (ko04010);; ErbB signaling pathway (ko04012);; Apoptosis (ko04210);; Wnt signaling pathway (ko04310);; Focal adhesion (ko04510);; Toll-like receptor signaling pathway (ko04620);; GnRH signaling pathway (ko04912);; AGE-RAGE signaling pathway in diabetic complications (ko04933);; Salmonella infection (ko05132);; Herpes simplex infection (ko05168)	[K]	Transcription	Jun-like transcription factor;; bZIP transcription factor;; bZIP Maf transcription factor;; Basic region leucine zipper	Transcription factor AP-1 OS=Serinus canaria OX=9135 GN=JUN PE=2 SV=1	K	Transcription	transcription factor AP-1-like [Oncorhynchus mykiss]	biological process: biological regulation (GO:0065007);; molecular function: nucleic acid binding transcription factor activity (GO:0001071);; molecular function: binding (GO:0005488)
gene20638	LOC110536453	0.779688	19	0.292878	8	0.998655	29	8.04069	194	21.0996	574	9.49242	269	0.00240839	4.672	up	--	--	Cellular Component: extracellular region (GO:0005576);; Biological Process: immune response (GO:0006955);; Molecular Function: chemokine activity (GO:0008009);; Biological Process: cell chemotaxis (GO:0060326);;	K12672|2.71684e-19|dre:798892|K12672 C-X-C motif chemokine 11 | (RefSeq) cxcl11.1, cxcl11l; chemokine (C-X-C motif) ligand 11, duplicate 1	Cytokine-cytokine receptor interaction (ko04060);; Toll-like receptor signaling pathway (ko04620)	--	--	Small cytokines (intecrine/chemokine), interleukin-8 like	C-X-C motif chemokine 11-1 OS=Danio rerio OX=7955 GN=cxcl11.1 PE=2 SV=1	U	Intracellular trafficking, secretion, and vesicular transport	C-X-C motif chemokine 11-1-like [Oncorhynchus mykiss]	cellular component: extracellular region (GO:0005576);; biological process: immune system process (GO:0002376);; biological process: response to stimulus (GO:0050896);; molecular function: binding (GO:0005488);; biological process: cellular process (GO:0009987);; biological process: locomotion (GO:0040011);; biological process: single-organism process (GO:0044699);; biological process: localizati…
gene7723	LOC110522641	0.937198	67	2.07008	131	1.1212	76	31.4924	1943	40.4911	2607	62.4132	4351	3.13662e-11	5.38526	up	--	--	Molecular Function: transcription factor activity, sequence-specific DNA binding (GO:0003700);; Cellular Component: transcription factor complex (GO:0005667);; Biological Process: regulation of transcription from RNA polymerase II promoter (GO:0006357);; Molecular Function: sequence-specific DNA binding (GO:0043565);;	K04379|2.15516e-121|mze:101487312|K04379 proto-oncogene protein c-fos | (RefSeq) proto-oncogene c-Fos-like	MAPK signaling pathway (ko04010);; Apoptosis (ko04210);; Toll-like receptor signaling pathway (ko04620);; Salmonella infection (ko05132);; Herpes simplex infection (ko05168)	[K]	Transcription	bZIP transcription factor;; Basic region leucine zipper;; bZIP Maf transcription factor	Proto-oncogene c-Fos OS=Takifugu rubripes OX=31033 GN=fos PE=3 SV=1	K	Transcription	proto-oncogene c-Fos-like [Oncorhynchus mykiss]	biological process: biological regulation (GO:0065007);; molecular function: nucleic acid binding transcription factor activity (GO:0001071);; cellular component: cell (GO:0005623);; cellular component: macromolecular complex (GO:0032991);; cellular component: cell part (GO:0044464);; molecular function: binding (GO:0005488)
gene19556	LOC110535550	4.17205	731	4.58212	686	3.25393	525	16.4241	2098	18.6611	2508	18.0359	2809	1.52443e-10	2.3365	up	[T]	Signal transduction mechanisms	Molecular Function: protein kinase activity (GO:0004672);; Molecular Function: ATP binding (GO:0005524);; Biological Process: protein phosphorylation (GO:0006468);;	K04415|7.39222e-160|xma:102235260|K04415 mitogen-activated protein kinase kinase kinase 8 [EC:2.7.11.25] | (RefSeq) map3k8; mitogen-activated protein kinase kinase kinase 8	MAPK signaling pathway (ko04010);; Toll-like receptor signaling pathway (ko04620)	[T]	Signal transduction mechanisms	Protein kinase domain;; Protein tyrosine kinase;; Protein kinase domain;; Protein tyrosine kinase	Serine/threonine-protein kinase TAO1-A OS=Xenopus laevis OX=8355 GN=taok1-a PE=2 SV=1	T	Signal transduction mechanisms	mitogen-activated protein kinase kinase kinase 8-like [Oncorhynchus mykiss]	biological process: metabolic process (GO:0008152);; biological process: cellular process (GO:0009987);; molecular function: catalytic activity (GO:0003824);; molecular function: binding (GO:0005488)
gene22618	LOC110538492	0.40178	17	0.550017	21	1.84868	63	372.549	11970	542.133	19980	474.54	18342	3.1791e-43	9.38122	up	--	--	Biological Process: leukocyte migration involved in inflammatory response (GO:0002523);; Cellular Component: extracellular space (GO:0005615);; Cellular Component: cell (GO:0005623);; Biological Process: immune response (GO:0006955);; Molecular Function: chemokine activity (GO:0008009);; Biological Process: response to carbohydrate (GO:0009743);; Biological Process: positive regulation of superox…	K10030|2.6644e-33|dre:100002946|K10030 interleukin 8 | (RefSeq) cxcl8a, cxcl8, il8, si:dkey-151b16.2; chemokine (C-X-C motif) ligand 8a	Cytokine-cytokine receptor interaction (ko04060);; Toll-like receptor signaling pathway (ko04620);; NOD-like receptor signaling pathway (ko04621);; RIG-I-like receptor signaling pathway (ko04622);; AGE-RAGE signaling pathway in diabetic complications (ko04933);; Salmonella infection (ko05132)	--	--	Small cytokines (intecrine/chemokine), interleukin-8 like	Interleukin-8 OS=Gallus gallus OX=9031 GN=CXCL8 PE=2 SV=1	S	Function unknown	permeability factor 2-like [Oncorhynchus kisutch]	biological process: immune system process (GO:0002376);; biological process: cellular process (GO:0009987);; biological process: locomotion (GO:0040011);; biological process: single-organism process (GO:0044699);; biological process: localization (GO:0051179);; cellular component: extracellular region (GO:0005576);; cellular component: extracellular region part (GO:0044421);; cellular component: …
gene22159	LOC110538940	0.067417	11	0.076388	10	0.089783	14	1.54525	205	1.26609	159	2.07042	290	2.69815e-12	4.62334	up	--	--	Molecular Function: cytokine activity (GO:0005125);; Molecular Function: cytokine receptor binding (GO:0005126);; Cellular Component: extracellular space (GO:0005615);; Biological Process: defense response to virus (GO:0051607);;	K05414|7.60896e-19|dre:360134|K05414 interferon alpha | (RefSeq) ifnphi1, ifn, ifn1; interferon phi 1	Cytokine-cytokine receptor interaction (ko04060);; Regulation of autophagy (ko04140);; Toll-like receptor signaling pathway (ko04620);; RIG-I-like receptor signaling pathway (ko04622);; Cytosolic DNA-sensing pathway (ko04623);; Herpes simplex infection (ko05168)	--	--	Interferon alpha/beta domain;; Nsp1-like C-terminal region	Interferon a3 OS=Oncorhynchus mykiss OX=8022 GN=ifna3 PE=2 SV=1	S	Function unknown	uncharacterized protein LOC110538940 [Oncorhynchus mykiss]	molecular function: binding (GO:0005488);; cellular component: extracellular region (GO:0005576);; cellular component: extracellular region part (GO:0044421);; biological process: immune system process (GO:0002376);; biological process: response to stimulus (GO:0050896);; biological process: multi-organism process (GO:0051704)
gene21744	LOC110537792	0.45132	70	0.389116	54	0.361565	54	1.35483	130	1.42147	144	2.12383	237	0.00439132	1.92329	up	--	--	Molecular Function: cytokine receptor activity (GO:0004896);; Molecular Function: cytokine activity (GO:0005125);; Cellular Component: extracellular space (GO:0005615);; Biological Process: cytokine-mediated signaling pathway (GO:0019221);;	K05425|1.72218e-51|xma:102226505|K05425 interleukin 12B | (RefSeq) interleukin-12 subunit beta-like	Cytokine-cytokine receptor interaction (ko04060);; Toll-like receptor signaling pathway (ko04620);; RIG-I-like receptor signaling pathway (ko04622);; Herpes simplex infection (ko05168)	--	--	Cytokine interleukin-12p40 C-terminus	--	O	Posttranslational modification, protein turnover, chaperones	interleukin-12 subunit beta-like [Oncorhynchus mykiss]	biological process: cellular process (GO:0009987);; biological process: signaling (GO:0023052);; biological process: single-organism process (GO:0044699);; biological process: response to stimulus (GO:0050896);; biological process: biological regulation (GO:0065007);; molecular function: signal transducer activity (GO:0004871);; molecular function: molecular transducer activity (GO:0060089);; mol…
gene22143	LOC110538042	0.123423	7	0.119933	6	0.317362	15	1.70625	72	2.10684	81	3.22429	139	1.27578e-06	3.78988	up	--	--	Biological Process: positive regulation of protein phosphorylation (GO:0001934);; Molecular Function: cytokine activity (GO:0005125);; Molecular Function: cytokine receptor binding (GO:0005126);; Cellular Component: extracellular space (GO:0005615);; Cellular Component: cytosol (GO:0005829);; Biological Process: positive regulation of gene expression (GO:0010628);; Biological Process: negative re…	K05414|5.16146e-30|dre:360134|K05414 interferon alpha | (RefSeq) ifnphi1, ifn, ifn1; interferon phi 1	Cytokine-cytokine receptor interaction (ko04060);; Regulation of autophagy (ko04140);; Toll-like receptor signaling pathway (ko04620);; RIG-I-like receptor signaling pathway (ko04622);; Cytosolic DNA-sensing pathway (ko04623);; Herpes simplex infection (ko05168)	--	--	Interferon alpha/beta domain	Interferon a3 OS=Oncorhynchus mykiss OX=8022 GN=ifna3 PE=2 SV=1	S	Function unknown	interferon a3-like [Salvelinus alpinus]	biological process: biological regulation (GO:0065007);; molecular function: binding (GO:0005488);; cellular component: extracellular region (GO:0005576);; cellular component: extracellular region part (GO:0044421);; cellular component: cell (GO:0005623);; cellular component: cell part (GO:0044464);; biological process: immune system process (GO:0002376);; biological process: response to stimulus…
gene22142	LOC110538044	0.086098	4	0.327359	13	0.622394	26	2.67493	97	1.93583	76	2.77568	115	4.41501e-05	3.13326	up	--	--	Biological Process: positive regulation of protein phosphorylation (GO:0001934);; Molecular Function: cytokine activity (GO:0005125);; Molecular Function: cytokine receptor binding (GO:0005126);; Cellular Component: extracellular space (GO:0005615);; Cellular Component: cytosol (GO:0005829);; Biological Process: positive regulation of gene expression (GO:0010628);; Biological Process: negative re…	K05414|1.08251e-30|dre:360134|K05414 interferon alpha | (RefSeq) ifnphi1, ifn, ifn1; interferon phi 1	Cytokine-cytokine receptor interaction (ko04060);; Regulation of autophagy (ko04140);; Toll-like receptor signaling pathway (ko04620);; RIG-I-like receptor signaling pathway (ko04622);; Cytosolic DNA-sensing pathway (ko04623);; Herpes simplex infection (ko05168)	--	--	Interferon alpha/beta domain	Interferon a3 OS=Oncorhynchus mykiss OX=8022 GN=ifna3 PE=2 SV=1	S	Function unknown	interferon a3-like [Salvelinus alpinus]	biological process: biological regulation (GO:0065007);; molecular function: binding (GO:0005488);; cellular component: extracellular region (GO:0005576);; cellular component: extracellular region part (GO:0044421);; cellular component: cell (GO:0005623);; cellular component: cell part (GO:0044464);; biological process: immune system process (GO:0002376);; biological process: response to stimulus…
gene5306	LOC110520065	15.2653	1305	13.7742	1018	9.6052	948	19.9067	1687	26.3621	2163	22.7011	2096	0.00130501	1.27794	up	--	--	--	K12650|1.42642e-101|ola:101174711|K12650 TRAF family member-associated NF-kappa-B activator | (RefSeq) tank; TRAF family member associated NFKB activator	RIG-I-like receptor signaling pathway (ko04622)	--	--	TBD domain	--	S	Function unknown	TRAF family member-associated NF-kappa-B activator-like [Oncorhynchus mykiss]	--
gene7824	LOC110523115	0.137917	25	0.34058	54	0.3442	58	8.32635	1271	3.10925	496	7.49612	1293	8.14041e-08	4.85179	up	--	--	Molecular Function: transcription factor activity, sequence-specific DNA binding (GO:0003700);; Biological Process: regulation of transcription, DNA-templated (GO:0006355);; Molecular Function: sequence-specific DNA binding (GO:0043565);;	K04448|5.65008e-110|mze:101463670|K04448 transcription factor AP-1 | (RefSeq) transcription factor AP-1-like	MAPK signaling pathway (ko04010);; ErbB signaling pathway (ko04012);; Apoptosis (ko04210);; Wnt signaling pathway (ko04310);; Focal adhesion (ko04510);; Toll-like receptor signaling pathway (ko04620);; GnRH signaling pathway (ko04912);; AGE-RAGE signaling pathway in diabetic complications (ko04933);; Salmonella infection (ko05132);; Herpes simplex infection (ko05168)	[K]	Transcription	Jun-like transcription factor;; bZIP transcription factor;; bZIP Maf transcription factor;; Basic region leucine zipper	Transcription factor AP-1 OS=Serinus canaria OX=9135 GN=JUN PE=2 SV=1	K	Transcription	transcription factor AP-1-like [Oncorhynchus mykiss]	biological process: biological regulation (GO:0065007);; molecular function: nucleic acid binding transcription factor activity (GO:0001071);; molecular function: binding (GO:0005488)
gene28337	LOC110490762	4.5413	640	4.15542	533	2.02305	274	0.585568	75	0.269605	36	0.525046	73	0.000440303	-2.58175	down	[J]	Translation, ribosomal structure and biogenesis	Biological Process: MAPK cascade (GO:0000165);; Molecular Function: MAP kinase activity (GO:0004707);; Molecular Function: ATP binding (GO:0005524);; Cellular Component: intracellular (GO:0005622);;	K04441|0|ola:101175696|K04441 p38 MAP kinase [EC:2.7.11.24] | (RefSeq) mitogen-activated protein kinase 11-like	MAPK signaling pathway (ko04010);; FoxO signaling pathway (ko04068);; Adrenergic signaling in cardiomyocytes (ko04261);; VEGF signaling pathway (ko04370);; Toll-like receptor signaling pathway (ko04620);; NOD-like receptor signaling pathway (ko04621);; RIG-I-like receptor signaling pathway (ko04622);; GnRH signaling pathway (ko04912);; Progesterone-mediated oocyte maturation (ko04914);; AGE-RAGE …	[T]	Signal transduction mechanisms	Protein kinase domain;; Protein tyrosine kinase;; DDE superfamily endonuclease	Mitogen-activated protein kinase 14 OS=Xenopus laevis OX=8355 GN=mapk14 PE=2 SV=1	T	Signal transduction mechanisms	mitogen-activated protein kinase 11-like [Oncorhynchus mykiss]	biological process: metabolic process (GO:0008152);; biological process: cellular process (GO:0009987);; biological process: signaling (GO:0023052);; biological process: single-organism process (GO:0044699);; biological process: response to stimulus (GO:0050896);; biological process: biological regulation (GO:0065007);; molecular function: catalytic activity (GO:0003824);; molecular function: sig…
gene10807	LOC100136024	0.182183	11	0.321617	16	0.304587	17	426.285	20481	1524.07	76398	762.842	41413	7.4183e-10	12.0338	up	--	--	Biological Process: fever generation (GO:0001660);; Biological Process: positive regulation of protein phosphorylation (GO:0001934);; Biological Process: positive regulation of leukocyte chemotaxis (GO:0002690);; Molecular Function: cytokine activity (GO:0005125);; Molecular Function: interleukin-1 receptor binding (GO:0005149);; Cellular Component: extracellular space (GO:0005615);; Cellular Com…	K04519|4.5798e-87|mze:101473431|K04519 interleukin 1 beta | (RefSeq) interleukin-1 beta-like	MAPK signaling pathway (ko04010);; Cytokine-cytokine receptor interaction (ko04060);; Toll-like receptor signaling pathway (ko04620);; NOD-like receptor signaling pathway (ko04621);; Cytosolic DNA-sensing pathway (ko04623);; AGE-RAGE signaling pathway in diabetic complications (ko04933);; Salmonella infection (ko05132);; Herpes simplex infection (ko05168)	--	--	Interleukin-1 / 18	Interleukin-1 beta OS=Oncorhynchus mykiss OX=8022 GN=il1b PE=2 SV=1	K	Transcription	interleukin-1 beta [Oncorhynchus mykiss]	biological process: multicellular organismal process (GO:0032501);; biological process: single-organism process (GO:0044699);; biological process: response to stimulus (GO:0050896);; biological process: biological regulation (GO:0065007);; molecular function: binding (GO:0005488);; cellular component: extracellular region (GO:0005576);; cellular component: extracellular region part (GO:0044421);;…
gene45278	LOC110508995	1.92587	525	1.99126	480	1.76637	457	16.5473	3896	20.55	5048	20.3122	5403	8.04966e-22	3.70261	up	--		Molecular Function: protein kinase activity (GO:0004672);; Molecular Function: ATP binding (GO:0005524);; Biological Process: protein phosphorylation (GO:0006468);; Biological Process: positive regulation of gene expression (GO:0010628);; Biological Process: regulation of apoptotic process (GO:0042981);;	K08846|0|dre:373874|K08846 receptor-interacting serine/threonine-protein kinase 2 [EC:2.7.11.1] | (RefSeq) ripk2, RICK; receptor-interacting serine-threonine kinase 2	NOD-like receptor signaling pathway (ko04621)	[T]	Signal transduction mechanisms	Protein kinase domain;; Protein tyrosine kinase;; Caspase recruitment domain	Serine/threonine-protein kinase B-raf OS=Gallus gallus OX=9031 GN=BRAF PE=1 SV=1	T	Signal transduction mechanisms	receptor-interacting serine/threonine-protein kinase 2-like [Oncorhynchus mykiss]	biological process: metabolic process (GO:0008152);; biological process: cellular process (GO:0009987);; molecular function: catalytic activity (GO:0003824);; molecular function: binding (GO:0005488);; biological process: biological regulation (GO:0065007)
gene35260	LOC110497729	32.4679	2076	33.99	1919	35.6279	2161	222.176	12257	282.208	16237	272.182	16950	1.08866e-13	3.29412	up	[T]	Signal transduction mechanisms	--	K04734|2.30001e-118|dre:323099|K04734 NF-kappa-B inhibitor alpha | (RefSeq) nfkbiab, NFKBIA, ikbaB, wu:fb81f08, zgc:56666, zgc:77616; nuclear factor of kappa light polypeptide gene enhancer in B-cells inhibitor, alpha b	Apoptosis (ko04210);; Toll-like receptor signaling pathway (ko04620);; NOD-like receptor signaling pathway (ko04621);; RIG-I-like receptor signaling pathway (ko04622);; Cytosolic DNA-sensing pathway (ko04623);; Adipocytokine signaling pathway (ko04920);; Herpes simplex infection (ko05168)	[R]	General function prediction only	Ankyrin repeats (3 copies);; Ankyrin repeats (many copies);; Ankyrin repeat;; Ankyrin repeats (many copies);; Ankyrin repeat	NF-kappa-B inhibitor alpha OS=Gallus gallus OX=9031 GN=NFKBIA PE=2 SV=1	S	Function unknown	NF-kappa-B inhibitor alpha-like [Oncorhynchus mykiss]	--
gene36551	LOC100136337	7.3594	1005	7.66527	943	7.83682	1002	99.9671	11767	169.013	20811	149.638	20148	2.13323e-14	4.57046	up	--	--	Molecular Function: DNA binding (GO:0003677);; Molecular Function: zinc ion binding (GO:0008270);; Cellular Component: integral component of membrane (GO:0016021);; Biological Process: protein ubiquitination (GO:0016567);; Biological Process: protein deubiquitination (GO:0016579);;	K11859|0|tru:101062530|K11859 tumor necrosis factor, alpha-induced protein 3 [EC:3.4.19.12] | (RefSeq) tnfaip3; TNF alpha induced protein 3	NOD-like receptor signaling pathway (ko04621)	[T]	Signal transduction mechanisms	OTU-like cysteine protease;; A20-like zinc finger	Ubiquitin thioesterase zranb1-B OS=Xenopus laevis OX=8355 GN=zranb1-b PE=2 SV=1	O	Posttranslational modification, protein turnover, chaperones	tumor necrosis factor alpha-induced protein 3 [Oncorhynchus mykiss]	molecular function: binding (GO:0005488);; cellular component: membrane (GO:0016020);; cellular component: membrane part (GO:0044425);; biological process: metabolic process (GO:0008152);; biological process: cellular process (GO:0009987)
gene50635	LOC110514649	52.7575	2974	28.8949	1439	35.4408	1731	67.3992	3101	125.528	5759	99.5992	5267	0.00333198	1.63591	up	--	--	Molecular Function: zinc ion binding (GO:0008270);; Biological Process: regulation of apoptotic process (GO:0042981);;	K16060|1.18137e-117|xma:102228638|K16060 baculoviral IAP repeat-containing protein 2/3 | (RefSeq) birc2; baculoviral IAP repeat containing 2	Ubiquitin mediated proteolysis (ko04120);; Apoptosis (ko04210);; Focal adhesion (ko04510);; NOD-like receptor signaling pathway (ko04621)	[DR]	Cell cycle control, cell division, chromosome partitioning;; General function prediction only	Inhibitor of Apoptosis domain;; Zinc finger, C3HC4 type (RING finger);; Prokaryotic RING finger family 4	Inhibitor of apoptosis protein OS=Gallus gallus OX=9031 GN=ITA PE=2 SV=1	O	Posttranslational modification, protein turnover, chaperones	PREDICTED: baculoviral IAP repeat-containing protein 2 [Cynoglossus semilaevis]	molecular function: binding (GO:0005488);; biological process: biological regulation (GO:0065007)
gene34403	LOC110496727	0.681718	45	0.781332	46	1.0556	71	22.4311	1280	121.188	7211	48.2206	3107	0.00465155	6.59958	up	--	--	Molecular Function: cytokine activity (GO:0005125);; Molecular Function: tumor necrosis factor receptor binding (GO:0005164);; Cellular Component: extracellular space (GO:0005615);; Biological Process: immune response (GO:0006955);; Cellular Component: integral component of membrane (GO:0016021);;	K03156|1.86468e-56|xma:102231253|K03156 tumor necrosis factor superfamily, member 2 | (RefSeq) tumor necrosis factor-like	MAPK signaling pathway (ko04010);; Cytokine-cytokine receptor interaction (ko04060);; mTOR signaling pathway (ko04150);; Apoptosis (ko04210);; TGF-beta signaling pathway (ko04350);; Toll-like receptor signaling pathway (ko04620);; NOD-like receptor signaling pathway (ko04621);; RIG-I-like receptor signaling pathway (ko04622);; Adipocytokine signaling pathway (ko04920);; AGE-RAGE signaling pathway…	--	--	TNF(Tumour Necrosis Factor) family	Tumor necrosis factor OS=Sparus aurata OX=8175 GN=tnf PE=3 SV=1	T	Signal transduction mechanisms	tumor necrosis factor-like [Oncorhynchus mykiss]	molecular function: binding (GO:0005488);; cellular component: extracellular region (GO:0005576);; cellular component: extracellular region part (GO:0044421);; biological process: immune system process (GO:0002376);; biological process: response to stimulus (GO:0050896);; cellular component: membrane (GO:0016020);; cellular component: membrane part (GO:0044425)
gene44782	LOC110508530	4.54245	441	9.23434	791	5.45338	502	9.84902	825	11.9456	1044	11.794	1116	0.00410484	1.16479	up	--	--	Molecular Function: transcription factor activity, sequence-specific DNA binding (GO:0003700);; Biological Process: regulation of transcription, DNA-templated (GO:0006355);; Molecular Function: sequence-specific DNA binding (GO:0043565);;	K04448|3.64151e-157|mze:101486839|K04448 transcription factor AP-1 | (RefSeq) jun; Jun proto-oncogene, AP-1 transcription factor subunit	MAPK signaling pathway (ko04010);; ErbB signaling pathway (ko04012);; Apoptosis (ko04210);; Wnt signaling pathway (ko04310);; Focal adhesion (ko04510);; Toll-like receptor signaling pathway (ko04620);; GnRH signaling pathway (ko04912);; AGE-RAGE signaling pathway in diabetic complications (ko04933);; Salmonella infection (ko05132);; Herpes simplex infection (ko05168)	[K]	Transcription	Jun-like transcription factor;; bZIP transcription factor;; bZIP Maf transcription factor;; Basic region leucine zipper	Transcription factor AP-1 OS=Serinus canaria OX=9135 GN=JUN PE=2 SV=1	K	Transcription	transcription factor AP-1-like [Oncorhynchus mykiss]	biological process: biological regulation (GO:0065007);; molecular function: nucleic acid binding transcription factor activity (GO:0001071);; molecular function: binding (GO:0005488)
gene42270	LOC110505735	36.0778	2203	29.4904	1592	40.5933	2350	255.552	13481	446.83	24593	388.403	23151	3.38989e-10	3.73927	up	[T]	Signal transduction mechanisms	--	K04734|1.02024e-106|dre:323099|K04734 NF-kappa-B inhibitor alpha | (RefSeq) nfkbiab, NFKBIA, ikbaB, wu:fb81f08, zgc:56666, zgc:77616; nuclear factor of kappa light polypeptide gene enhancer in B-cells inhibitor, alpha b	Apoptosis (ko04210);; Toll-like receptor signaling pathway (ko04620);; NOD-like receptor signaling pathway (ko04621);; RIG-I-like receptor signaling pathway (ko04622);; Cytosolic DNA-sensing pathway (ko04623);; Adipocytokine signaling pathway (ko04920);; Herpes simplex infection (ko05168)	[R]	General function prediction only	Ankyrin repeats (3 copies);; Ankyrin repeats (many copies);; Ankyrin repeat;; Ankyrin repeats (many copies);; Ankyrin repeat	NF-kappa-B inhibitor alpha OS=Gallus gallus OX=9031 GN=NFKBIA PE=2 SV=1	S	Function unknown	NF-kappa-B inhibitor alpha-like [Oncorhynchus mykiss]	--
gene23315	LOC110485435	18.7769	1525	15.1225	1089	17.8567	1357	76.6217	5161	143.464	10473	94.6211	7606	4.00417e-05	2.97809	up	[T]	Signal transduction mechanisms	Molecular Function: GTP binding (GO:0005525);;	K08847|1.08648e-75|mze:101480907|K08847 receptor-interacting serine/threonine-protein kinase 3 [EC:2.7.11.1] | (RefSeq) ripk3; receptor-interacting serine/threonine-protein kinase 3	Cytosolic DNA-sensing pathway (ko04623)	--	--	AIG1 family;; 50S ribosome-binding GTPase;; Protein kinase domain;; Protein tyrosine kinase	LIM domain kinase 1 OS=Gallus gallus OX=9031 GN=LIMK1 PE=1 SV=1	T	Signal transduction mechanisms	GTPase, IMAP family member 7 [Oncorhynchus mykiss]	molecular function: binding (GO:0005488)
gene13731	LOC110529274	0.999614	83	1.47555	111	1.14424	93	8.46492	615	11.574	879	26.9685	2218	0.00723765	4.06093	up	--	--	Molecular Function: transcription factor activity, sequence-specific DNA binding (GO:0003700);; Cellular Component: transcription factor complex (GO:0005667);; Biological Process: regulation of transcription from RNA polymerase II promoter (GO:0006357);; Molecular Function: sequence-specific DNA binding (GO:0043565);;	K04379|6.89564e-113|mze:101487312|K04379 proto-oncogene protein c-fos | (RefSeq) proto-oncogene c-Fos-like	MAPK signaling pathway (ko04010);; Apoptosis (ko04210);; Toll-like receptor signaling pathway (ko04620);; Salmonella infection (ko05132);; Herpes simplex infection (ko05168)	[K]	Transcription	bZIP transcription factor;; Basic region leucine zipper;; bZIP Maf transcription factor	Proto-oncogene c-Fos OS=Takifugu rubripes OX=31033 GN=fos PE=3 SV=1	K	Transcription	proto-oncogene c-Fos-like [Oncorhynchus mykiss]	biological process: biological regulation (GO:0065007);; molecular function: nucleic acid binding transcription factor activity (GO:0001071);; cellular component: cell (GO:0005623);; cellular component: macromolecular complex (GO:0032991);; cellular component: cell part (GO:0044464);; molecular function: binding (GO:0005488)
gene4948	tnf	0.05376	4	0.174421	10	0.280571	17	18.6871	1013	94.3359	5335	31.5833	1935	0.000993215	8.48925	up	--	--	Biological Process: regulation of leukocyte migration (GO:0002685);; Molecular Function: cytokine activity (GO:0005125);; Molecular Function: tumor necrosis factor receptor binding (GO:0005164);; Cellular Component: extracellular space (GO:0005615);; Cellular Component: cell (GO:0005623);; Biological Process: immune response (GO:0006955);; Biological Process: response to carbohydrate (GO:0009743)…	K03156|4.15268e-59|mze:101469924|K03156 tumor necrosis factor superfamily, member 2 | (RefSeq) tumor necrosis factor-like	MAPK signaling pathway (ko04010);; Cytokine-cytokine receptor interaction (ko04060);; mTOR signaling pathway (ko04150);; Apoptosis (ko04210);; TGF-beta signaling pathway (ko04350);; Toll-like receptor signaling pathway (ko04620);; NOD-like receptor signaling pathway (ko04621);; RIG-I-like receptor signaling pathway (ko04622);; Adipocytokine signaling pathway (ko04920);; AGE-RAGE signaling pathway…	--	--	TNF(Tumour Necrosis Factor) family	Tumor necrosis factor OS=Sparus aurata OX=8175 GN=tnf PE=3 SV=1	T	Signal transduction mechanisms	tumor necrosis factor [Oncorhynchus mykiss]	biological process: biological regulation (GO:0065007);; molecular function: binding (GO:0005488);; cellular component: extracellular region (GO:0005576);; cellular component: extracellular region part (GO:0044421);; cellular component: cell (GO:0005623);; biological process: immune system process (GO:0002376);; biological process: response to stimulus (GO:0050896);; cellular component: membrane …
gene29746	tnfrsf5a	22.8216	2077	22.7498	1827	24.6361	2128	44.7922	3535	76.0549	6252	71.4855	6345	0.000153888	1.83152	up	--	--	Molecular Function: transmembrane signaling receptor activity (GO:0004888);; Biological Process: apoptotic process (GO:0006915);; Biological Process: immune response (GO:0006955);; Biological Process: signal transduction (GO:0007165);; Cellular Component: integral component of membrane (GO:0016021);;	K03160|1.33409e-52|mze:101487191|K03160 tumor necrosis factor receptor superfamily member 5 | (RefSeq) tumor necrosis factor receptor superfamily member 5	Cytokine-cytokine receptor interaction (ko04060);; Cell adhesion molecules (CAMs) (ko04514);; Toll-like receptor signaling pathway (ko04620);; Intestinal immune network for IgA production (ko04672)	--	--	TNFR/NGFR cysteine-rich region	--	U	Intracellular trafficking, secretion, and vesicular transport	TNF receptor superfamily member 5A precursor [Oncorhynchus mykiss]	biological process: cellular process (GO:0009987);; biological process: signaling (GO:0023052);; biological process: single-organism process (GO:0044699);; biological process: response to stimulus (GO:0050896);; biological process: biological regulation (GO:0065007);; molecular function: signal transducer activity (GO:0004871);; molecular function: molecular transducer activity (GO:0060089);; bio…
gene8432	LOC110523645	5.11741	173	5.51094	162	7.35184	241	12.6279	373	12.7525	382	12.3798	406	0.0065453	1.42438	up	--	--	Biological Process: regulation of apoptotic process (GO:0042981);;	K12801|1.91895e-14|cmk:103184066|K12801 caspase recruitment domain-containing protein 8 | (RefSeq) caspase recruitment domain-containing protein 8-like	NOD-like receptor signaling pathway (ko04621)	[D]	Cell cycle control, cell division, chromosome partitioning	Caspase recruitment domain	--	O	Posttranslational modification, protein turnover, chaperones	caspase recruitment domain-containing protein 8-like [Oncorhynchus mykiss]	biological process: biological regulation (GO:0065007)
gene14597	LOC110530062	0.429241	57	0.35903	50	0.407063	56	2.39258	314	1.22861	157	3.77359	461	0.000845984	2.90395	up	--		Molecular Function: protein kinase activity (GO:0004672);; Molecular Function: ATP binding (GO:0005524);; Biological Process: protein phosphorylation (GO:0006468);; Biological Process: positive regulation of gene expression (GO:0010628);; Biological Process: regulation of apoptotic process (GO:0042981);;	K08846|0|xma:102234179|K08846 receptor-interacting serine/threonine-protein kinase 2 [EC:2.7.11.1] | (RefSeq) ripk2; receptor interacting serine/threonine kinase 2	NOD-like receptor signaling pathway (ko04621)	[T]	Signal transduction mechanisms	Protein tyrosine kinase;; Protein kinase domain;; Caspase recruitment domain	Serine/threonine-protein kinase B-raf OS=Coturnix japonica OX=93934 GN=BRAF PE=2 SV=1	T	Signal transduction mechanisms	receptor-interacting serine/threonine-protein kinase 2-like [Oncorhynchus mykiss]	biological process: metabolic process (GO:0008152);; biological process: cellular process (GO:0009987);; molecular function: catalytic activity (GO:0003824);; molecular function: binding (GO:0005488);; biological process: biological regulation (GO:0065007)
gene20577	LOC110536401	0	0	0	0	0	0	256.113	12760	1131.03	58790	479.36	26984	2.14392e-10	Inf	up	--	--	Biological Process: fever generation (GO:0001660);; Biological Process: positive regulation of protein phosphorylation (GO:0001934);; Biological Process: positive regulation of leukocyte chemotaxis (GO:0002690);; Molecular Function: cytokine activity (GO:0005125);; Molecular Function: interleukin-1 receptor binding (GO:0005149);; Cellular Component: extracellular space (GO:0005615);; Cellular Com…	K04519|1.85715e-68|mze:101473431|K04519 interleukin 1 beta | (RefSeq) interleukin-1 beta-like	MAPK signaling pathway (ko04010);; Cytokine-cytokine receptor interaction (ko04060);; Toll-like receptor signaling pathway (ko04620);; NOD-like receptor signaling pathway (ko04621);; Cytosolic DNA-sensing pathway (ko04623);; AGE-RAGE signaling pathway in diabetic complications (ko04933);; Salmonella infection (ko05132);; Herpes simplex infection (ko05168)	--	--	Interleukin-1 / 18	Interleukin-1 beta OS=Oncorhynchus mykiss OX=8022 GN=il1b PE=2 SV=1	K	Transcription	interleukin-1 beta-like [Oncorhynchus mykiss]	biological process: multicellular organismal process (GO:0032501);; biological process: single-organism process (GO:0044699);; biological process: response to stimulus (GO:0050896);; biological process: biological regulation (GO:0065007);; molecular function: binding (GO:0005488);; cellular component: extracellular region (GO:0005576);; cellular component: extracellular region part (GO:0044421);;…
gene44284	LOC110507976	1.62287	326	0.628127	139	1.61425	206	10.4697	1465	6.95124	989	14.6707	2043	1.89553e-08	3.16436	up	--	--	Cellular Component: integral component of membrane (GO:0016021);;	K05412|6.45671e-29|tru:105417042|K05412 CD80 antigen | (RefSeq) uncharacterized LOC105417042	Cell adhesion molecules (CAMs) (ko04514);; Toll-like receptor signaling pathway (ko04620);; Intestinal immune network for IgA production (ko04672)	--	--	Immunoglobulin V-set domain;; Immunoglobulin I-set domain;; CD80-like C2-set immunoglobulin domain	--	S	Function unknown	T-lymphocyte activation antigen CD80-like [Oncorhynchus mykiss]	cellular component: membrane (GO:0016020);; cellular component: membrane part (GO:0044425)
gene42298	LOC110505762	4.57679	811	2.24708	548	3.44703	751	17.6685	3281	24.3492	4497	21.4139	4455	4.70437e-15	2.9583	up	--	--	Biological Process: regulation of cytokine production (GO:0001817);; Biological Process: response to yeast (GO:0001878);; Molecular Function: ubiquitin-protein transferase activity (GO:0004842);; Biological Process: Toll signaling pathway (GO:0008063);; Molecular Function: zinc ion binding (GO:0008270);; Biological Process: protein ubiquitination (GO:0016567);; Biological Process: negative regula…	K03174|0|dre:445119|K03174 TNF receptor-associated factor 3 | (RefSeq) traf3, zgc:92367; TNF receptor-associated factor 3	Toll-like receptor signaling pathway (ko04620);; RIG-I-like receptor signaling pathway (ko04622);; Herpes simplex infection (ko05168)	[T]	Signal transduction mechanisms	TRAF-type zinc finger;; Zinc finger, C3HC4 type (RING finger)	TNF receptor-associated factor 6 OS=Xenopus tropicalis OX=8364 GN=traf6 PE=2 SV=1	K	Transcription	TNF receptor-associated factor 3-like [Oncorhynchus mykiss]	biological process: biological regulation (GO:0065007);; biological process: response to stimulus (GO:0050896);; biological process: multi-organism process (GO:0051704);; molecular function: catalytic activity (GO:0003824);; biological process: cellular process (GO:0009987);; biological process: signaling (GO:0023052);; biological process: single-organism process (GO:0044699);; molecular function…
gene45915	traf2	7.86241	3016	7.32714	2313	8.33985	3042	12.6803	4499	23.0862	7600	12.1184	5081	0.00828631	1.4667	up	--	--	Biological Process: signal transduction (GO:0007165);; Molecular Function: zinc ion binding (GO:0008270);; Biological Process: regulation of apoptotic process (GO:0042981);;	K03173|0|xma:102233408|K03173 TNF receptor-associated factor 2 [EC:2.3.2.27] | (RefSeq) traf2; TNF receptor associated factor 2	MAPK signaling pathway (ko04010);; Protein processing in endoplasmic reticulum (ko04141);; Apoptosis (ko04210);; RIG-I-like receptor signaling pathway (ko04622);; Adipocytokine signaling pathway (ko04920);; Herpes simplex infection (ko05168)	[T]	Signal transduction mechanisms	TNF receptor-associated factor BIRC3 binding domain;; TRAF-type zinc finger	TNF receptor-associated factor 6-B OS=Xenopus laevis OX=8355 GN=traf6-b PE=2 SV=1	S	Function unknown	tumor necrosis factor receptor associated factor 2 isoform X1 [Oncorhynchus mykiss]	biological process: cellular process (GO:0009987);; biological process: biological regulation (GO:0065007);; molecular function: binding (GO:0005488)
gene40253	LOC110503453	0	0	0	0	0	0	0.916499	46	1.09123	57	1.19403	67	4.94596e-12	Inf	up	--	--	Molecular Function: interleukin-12 receptor binding (GO:0005143);; Cellular Component: extracellular region (GO:0005576);; Biological Process: immune response (GO:0006955);; Molecular Function: growth factor activity (GO:0008083);;	K05406|4.19122e-28|mze:101469522|K05406 interleukin 12A | (RefSeq) interleukin-12 subunit alpha-like	Cytokine-cytokine receptor interaction (ko04060);; Toll-like receptor signaling pathway (ko04620);; RIG-I-like receptor signaling pathway (ko04622);; Herpes simplex infection (ko05168)	--	--	Interleukin-12 alpha subunit	--	S	Function unknown	uncharacterized protein LOC110503453 [Oncorhynchus mykiss]	molecular function: binding (GO:0005488);; cellular component: extracellular region (GO:0005576);; biological process: immune system process (GO:0002376);; biological process: response to stimulus (GO:0050896)
gene26675	LOC110488722	14.4243	2667	20.545	3263	20.6307	3616	37.9446	5806	57.9553	9282	46.928	8146	6.7247e-05	1.68989	up	[T]	Signal transduction mechanisms	Molecular Function: DNA binding (GO:0003677);; Molecular Function: transcription factor activity, sequence-specific DNA binding (GO:0003700);; Cellular Component: nucleus (GO:0005634);; Cellular Component: cytoplasm (GO:0005737);; Biological Process: regulation of transcription from RNA polymerase II promoter (GO:0006357);; Biological Process: signal transduction (GO:0007165);;	K02580|0|mze:101479063|K02580 nuclear factor NF-kappa-B p105 subunit | (RefSeq) nfkb1; nuclear factor kappa B subunit 1	MAPK signaling pathway (ko04010);; Apoptosis (ko04210);; Toll-like receptor signaling pathway (ko04620);; NOD-like receptor signaling pathway (ko04621);; RIG-I-like receptor signaling pathway (ko04622);; Cytosolic DNA-sensing pathway (ko04623);; Adipocytokine signaling pathway (ko04920);; AGE-RAGE signaling pathway in diabetic complications (ko04933);; Salmonella infection (ko05132);; Herpes simp…	--	--	Rel homology DNA-binding domain;; Rel homology dimerisation domain;; Ankyrin repeats (3 copies);; Ankyrin repeat;; Ankyrin repeats (many copies);; Ankyrin repeats (many copies);; Ankyrin repeat	Nuclear factor NF-kappa-B p105 subunit OS=Gallus gallus OX=9031 GN=NFKB1 PE=2 SV=2	S	Function unknown	nuclear factor NF-kappa-B p105 subunit-like [Oncorhynchus mykiss]	molecular function: binding (GO:0005488);; biological process: biological regulation (GO:0065007);; molecular function: nucleic acid binding transcription factor activity (GO:0001071);; cellular component: cell (GO:0005623);; cellular component: organelle (GO:0043226);; cellular component: cell part (GO:0044464);; biological process: cellular process (GO:0009987)
gene8235	LOC110523476	24.4925	4053	19.4867	2787	20.9815	3282	56.7742	7597	52.4	7763	49.2216	7563	0.000207448	1.60132	up	--	--	--	K02649|0|xma:102216923|K02649 phosphoinositide-3-kinase regulatory subunit alpha/beta/delta | (RefSeq) phosphatidylinositol 3-kinase regulatory subunit alpha-like	ErbB signaling pathway (ko04012);; FoxO signaling pathway (ko04068);; Phosphatidylinositol signaling system (ko04070);; mTOR signaling pathway (ko04150);; Apoptosis (ko04210);; Adrenergic signaling in cardiomyocytes (ko04261);; VEGF signaling pathway (ko04370);; Focal adhesion (ko04510);; Toll-like receptor signaling pathway (ko04620);; Regulation of actin cytoskeleton (ko04810);; Insulin signali…	[T]	Signal transduction mechanisms	Phosphatidylinositol 3-kinase regulatory subunit P85 inter-SH2 domain;; SH2 domain;; RhoGAP domain	Phosphatidylinositol 3-kinase regulatory subunit alpha OS=Xenopus laevis OX=8355 GN=pik3r1-a PE=2 SV=1	T	Signal transduction mechanisms	phosphatidylinositol 3-kinase regulatory subunit alpha isoform X1 [Oncorhynchus mykiss]	--
gene38568	LOC110501543	16.535	1180	16.3958	1034	20.4419	1383	183.097	11290	162.858	10477	138.422	9644	4.23569e-17	3.54393	up	--	--	Biological Process: chemotaxis (GO:0006935);; Biological Process: G-protein coupled receptor signaling pathway (GO:0007186);; Cellular Component: integral component of membrane (GO:0016021);; Molecular Function: C-X-C chemokine receptor activity (GO:0016494);; Biological Process: regulation of cell migration (GO:0030334);; Molecular Function: ubiquitin binding (GO:0043130);; Biological Process: c…	K04189|1.07862e-166|tru:101066475|K04189 C-X-C chemokine receptor type 4 | (RefSeq) cxcr4; C-X-C motif chemokine receptor 4	Cytokine-cytokine receptor interaction (ko04060);; Endocytosis (ko04144);; Intestinal immune network for IgA production (ko04672)	[R]	General function prediction only	7 transmembrane receptor (rhodopsin family)	C-X-C chemokine receptor type 4-B OS=Xenopus laevis OX=8355 GN=cxcr4-b PE=2 SV=1	U	Intracellular trafficking, secretion, and vesicular transport	unnamed protein product [Oncorhynchus mykiss]	biological process: locomotion (GO:0040011);; biological process: response to stimulus (GO:0050896);; biological process: cellular process (GO:0009987);; biological process: signaling (GO:0023052);; biological process: single-organism process (GO:0044699);; biological process: biological regulation (GO:0065007);; cellular component: membrane (GO:0016020);; cellular component: membrane part (GO:00…
gene22156	LOC110538058	0.146463	7	0.014618	1	0.055993	3	2.07627	79	2.47818	93	1.59614	64	2.15688e-08	4.8986	up	--	--	Biological Process: positive regulation of protein phosphorylation (GO:0001934);; Molecular Function: cytokine activity (GO:0005125);; Molecular Function: cytokine receptor binding (GO:0005126);; Cellular Component: extracellular space (GO:0005615);; Cellular Component: cytosol (GO:0005829);; Biological Process: positive regulation of gene expression (GO:0010628);; Biological Process: negative re…	K05414|2.8861e-30|dre:360134|K05414 interferon alpha | (RefSeq) ifnphi1, ifn, ifn1; interferon phi 1	Cytokine-cytokine receptor interaction (ko04060);; Regulation of autophagy (ko04140);; Toll-like receptor signaling pathway (ko04620);; RIG-I-like receptor signaling pathway (ko04622);; Cytosolic DNA-sensing pathway (ko04623);; Herpes simplex infection (ko05168)	--	--	Interferon alpha/beta domain	Interferon a3 OS=Oncorhynchus mykiss OX=8022 GN=ifna3 PE=2 SV=1	S	Function unknown	interferon a3-like isoform X2 [Oncorhynchus mykiss]	biological process: biological regulation (GO:0065007);; molecular function: binding (GO:0005488);; cellular component: extracellular region (GO:0005576);; cellular component: extracellular region part (GO:0044421);; cellular component: cell (GO:0005623);; cellular component: cell part (GO:0044464);; biological process: immune system process (GO:0002376);; biological process: response to stimulus…
gene4481	tnfr	7.92995	512	8.99676	516	6.18423	379	32.1217	1516	79.2553	3909	63.8859	3509	0.000507151	3.0729	up	--	--	Molecular Function: transmembrane signaling receptor activity (GO:0004888);; Biological Process: apoptotic process (GO:0006915);; Biological Process: immune response (GO:0006955);; Biological Process: signal transduction (GO:0007165);; Cellular Component: integral component of membrane (GO:0016021);;	K03159|2.80145e-48|tru:101073138|K03159 lymphotoxin beta receptor TNFR superfamily member 3 | (RefSeq) ltbr; lymphotoxin beta receptor	Cytokine-cytokine receptor interaction (ko04060);; Intestinal immune network for IgA production (ko04672)	--	--	--	--	U	Intracellular trafficking, secretion, and vesicular transport	unnamed protein product, partial [Oncorhynchus mykiss]	biological process: cellular process (GO:0009987);; biological process: signaling (GO:0023052);; biological process: single-organism process (GO:0044699);; biological process: response to stimulus (GO:0050896);; biological process: biological regulation (GO:0065007);; molecular function: signal transducer activity (GO:0004871);; molecular function: molecular transducer activity (GO:0060089);; bio…
gene41396	LOC110504918	25.4553	4726	22.9996	3717	19.1203	3297	38.62	6041	51.0029	8749	46.1683	8227	0.00196338	1.38702	up	[T]	Signal transduction mechanisms	Molecular Function: DNA binding (GO:0003677);; Molecular Function: transcription factor activity, sequence-specific DNA binding (GO:0003700);; Cellular Component: nucleus (GO:0005634);; Cellular Component: cytoplasm (GO:0005737);; Biological Process: regulation of transcription from RNA polymerase II promoter (GO:0006357);; Biological Process: signal transduction (GO:0007165);;	K02580|0|ola:101167764|K02580 nuclear factor NF-kappa-B p105 subunit | (RefSeq) nfkb1; nuclear factor kappa B subunit 1	MAPK signaling pathway (ko04010);; Apoptosis (ko04210);; Toll-like receptor signaling pathway (ko04620);; NOD-like receptor signaling pathway (ko04621);; RIG-I-like receptor signaling pathway (ko04622);; Cytosolic DNA-sensing pathway (ko04623);; Adipocytokine signaling pathway (ko04920);; AGE-RAGE signaling pathway in diabetic complications (ko04933);; Salmonella infection (ko05132);; Herpes simp…	--	--	Rel homology DNA-binding domain;; Rel homology dimerisation domain;; Ankyrin repeats (3 copies);; Ankyrin repeats (many copies);; Ankyrin repeat;; Ankyrin repeat;; Ankyrin repeats (many copies)	Nuclear factor NF-kappa-B p105 subunit OS=Gallus gallus OX=9031 GN=NFKB1 PE=2 SV=2	S	Function unknown	unnamed protein product [Oncorhynchus mykiss]	molecular function: binding (GO:0005488);; biological process: biological regulation (GO:0065007);; molecular function: nucleic acid binding transcription factor activity (GO:0001071);; cellular component: cell (GO:0005623);; cellular component: organelle (GO:0043226);; cellular component: cell part (GO:0044464);; biological process: cellular process (GO:0009987)
gene23752	pik3r5	10.3819	1930	10.7709	1764	8.57024	1507	40.5363	6491	73.1704	12285	60.7131	11014	7.63489e-07	2.92937	up	--	--	Cellular Component: phosphatidylinositol 3-kinase complex, class IB (GO:0005944);; Biological Process: regulation of phosphatidylinositol 3-kinase activity (GO:0043551);; Molecular Function: 1-phosphatidylinositol-3-kinase regulator activity (GO:0046935);;	K21290|0|mze:101482467|K21290 phosphoinositide-3-kinase regulatory subunit 5/6 | (RefSeq) pik3r5; phosphoinositide-3-kinase regulatory subunit 5	ErbB signaling pathway (ko04012);; FoxO signaling pathway (ko04068);; Phosphatidylinositol signaling system (ko04070);; mTOR signaling pathway (ko04150);; Apoptosis (ko04210);; Adrenergic signaling in cardiomyocytes (ko04261);; VEGF signaling pathway (ko04370);; Focal adhesion (ko04510);; Toll-like receptor signaling pathway (ko04620);; Regulation of actin cytoskeleton (ko04810);; Insulin signali…	--	--	Phosphoinositide 3-kinase gamma adapter protein p101 subunit	Phosphoinositide 3-kinase regulatory subunit 5 OS=Gallus gallus OX=9031 GN=PIK3R5 PE=2 SV=1	T	Signal transduction mechanisms	phosphoinositide 3-kinase regulatory subunit 5 [Oncorhynchus mykiss]	cellular component: membrane (GO:0016020);; cellular component: macromolecular complex (GO:0032991);; cellular component: membrane part (GO:0044425);; biological process: biological regulation (GO:0065007);; molecular function: molecular function regulator (GO:0098772)
gene26188	LOC110489275	1.08556	126	1.29436	120	0.364479	66	5.1578	600	12.4793	1201	11.8447	1292	1.8999e-07	3.70944	up	--	--	Cellular Component: integral component of membrane (GO:0016021);;	K17834|4.33084e-166|xma:106699738|K17834 cyclic GMP-AMP synthase [EC:2.7.7.86] | (RefSeq) cyclic GMP-AMP synthase-like	Cytosolic DNA-sensing pathway (ko04623)	--	--	Mab-21 protein	--	S	Function unknown	cyclic GMP-AMP synthase-like [Oncorhynchus mykiss]	cellular component: membrane (GO:0016020);; cellular component: membrane part (GO:0044425)
Oncorhynchus_mykiss_newGene_59965	--	7.6737	851	6.98115	664	7.1378	759	2.97169	225	2.00135	189	1.78345	204	0.00114095	-1.46401	down	[K]	Transcription	Biological Process: MyD88-dependent toll-like receptor signaling pathway (GO:0002755);; Molecular Function: DNA binding (GO:0003677);; Molecular Function: double-stranded RNA binding (GO:0003725);; Molecular Function: single-stranded RNA binding (GO:0003727);; Molecular Function: transmembrane signaling receptor activity (GO:0004888);; Biological Process: inflammatory response (GO:0006954);; Cell…	K10170|0|mze:106675113|K10170 toll-like receptor 8 | (RefSeq) toll-like receptor 8	Toll-like receptor signaling pathway (ko04620)	[T]	Signal transduction mechanisms	Leucine rich repeat;; Leucine Rich repeats (2 copies);; Leucine-rich repeat;; Leucine Rich repeat;; Leucine Rich Repeat	Leucine-rich repeat transmembrane protein FLRT3 OS=Gallus gallus OX=9031 GN=FLRT3 PE=1 SV=2	S	Function unknown	toll-like receptor 8a2 [Oncorhynchus mykiss]	biological process: immune system process (GO:0002376);; biological process: cellular process (GO:0009987);; biological process: signaling (GO:0023052);; biological process: single-organism process (GO:0044699);; biological process: response to stimulus (GO:0050896);; biological process: biological regulation (GO:0065007);; molecular function: binding (GO:0005488);; molecular function: signal tra…
gene16203	LOC110531834	7.96022	813	9.82602	887	8.28904	791	22.5075	1991	26.9222	2465	26.3062	2608	2.41386e-07	1.90565	up	--	--	Molecular Function: DNA binding (GO:0003677);; Molecular Function: transcription factor activity, sequence-specific DNA binding (GO:0003700);; Cellular Component: nucleus (GO:0005634);; Cellular Component: cytoplasm (GO:0005737);; Biological Process: positive regulation of NF-kappaB transcription factor activity (GO:0051092);; Cellular Component: NF-kappaB complex (GO:0071159);;	K04735|0|xma:102219636|K04735 transcription factor p65 | (RefSeq) transcription factor p65-like	MAPK signaling pathway (ko04010);; Apoptosis (ko04210);; Toll-like receptor signaling pathway (ko04620);; NOD-like receptor signaling pathway (ko04621);; RIG-I-like receptor signaling pathway (ko04622);; Cytosolic DNA-sensing pathway (ko04623);; Adipocytokine signaling pathway (ko04920);; AGE-RAGE signaling pathway in diabetic complications (ko04933);; Salmonella infection (ko05132);; Herpes simp…	--	--	Rel homology DNA-binding domain;; Rel homology dimerisation domain	Putative transcription factor p65 homolog OS=Xenopus laevis OX=8355 GN=rela PE=2 SV=1	K	Transcription	transcription factor p65-like isoform X1 [Oncorhynchus mykiss]	molecular function: binding (GO:0005488);; biological process: biological regulation (GO:0065007);; molecular function: nucleic acid binding transcription factor activity (GO:0001071);; cellular component: cell (GO:0005623);; cellular component: organelle (GO:0043226);; cellular component: cell part (GO:0044464);; cellular component: macromolecular complex (GO:0032991)
gene13908	LOC100136058	70.5198	4092	67.6558	3470	68.9735	3795	590.316	29602	769.359	40252	791.453	44844	8.74219e-13	3.74666	up	[T]	Signal transduction mechanisms	Molecular Function: kinase activity (GO:0016301);; Biological Process: phosphorylation (GO:0016310);;	K04734|3.2801e-142|mze:101464752|K04734 NF-kappa-B inhibitor alpha | (RefSeq) NF-kappa-B inhibitor alpha-like	Apoptosis (ko04210);; Toll-like receptor signaling pathway (ko04620);; NOD-like receptor signaling pathway (ko04621);; RIG-I-like receptor signaling pathway (ko04622);; Cytosolic DNA-sensing pathway (ko04623);; Adipocytokine signaling pathway (ko04920);; Herpes simplex infection (ko05168)	[R]	General function prediction only	Ankyrin repeats (many copies);; Ankyrin repeats (3 copies);; Ankyrin repeat;; Ankyrin repeat;; Ankyrin repeats (many copies)	NF-kappa-B inhibitor alpha OS=Gallus gallus OX=9031 GN=NFKBIA PE=2 SV=1	S	Function unknown	inhibitor of nuclear factor kappa B alpha [Oncorhynchus mykiss]	molecular function: catalytic activity (GO:0003824);; biological process: metabolic process (GO:0008152);; biological process: cellular process (GO:0009987)
gene2178	LOC110539162	8.91862	1529	13.1312	1862	10.6195	1670	4.71959	663	2.3227	328	4.48126	723	0.00493659	-1.1786	down	[K]	Transcription	Molecular Function: ATP binding (GO:0005524);; Biological Process: positive regulation of gene expression (GO:0010628);; Biological Process: regulation of apoptotic process (GO:0042981);;	K08727|0|mze:101466792|K08727 nucleotide-binding oligomerization domain-containing protein 1 | (RefSeq) nod1; nucleotide binding oligomerization domain containing 1	NOD-like receptor signaling pathway (ko04621)	[S]	Function unknown	NACHT domain;; Caspase recruitment domain;; Leucine Rich repeat;; Leucine Rich repeats (2 copies)	Protein NLRC5 OS=Ictalurus punctatus OX=7998 GN=nlrc5 PE=2 SV=1	S	Function unknown	nucleotide-binding oligomerization domain-containing protein 1-like [Oncorhynchus mykiss]	molecular function: binding (GO:0005488);; biological process: biological regulation (GO:0065007)
gene22617	LOC110538491	1.93114	47	2.14833	46	1.55111	36	35.1594	732	83.7123	1819	85.2039	2005	4.21555e-08	5.5437	up	--	--	Biological Process: leukocyte migration involved in inflammatory response (GO:0002523);; Cellular Component: extracellular space (GO:0005615);; Cellular Component: cell (GO:0005623);; Biological Process: immune response (GO:0006955);; Molecular Function: chemokine activity (GO:0008009);; Biological Process: response to carbohydrate (GO:0009743);; Biological Process: positive regulation of superox…	K10030|4.39961e-34|dre:100002946|K10030 interleukin 8 | (RefSeq) cxcl8a, cxcl8, il8, si:dkey-151b16.2; chemokine (C-X-C motif) ligand 8a	Cytokine-cytokine receptor interaction (ko04060);; Toll-like receptor signaling pathway (ko04620);; NOD-like receptor signaling pathway (ko04621);; RIG-I-like receptor signaling pathway (ko04622);; AGE-RAGE signaling pathway in diabetic complications (ko04933);; Salmonella infection (ko05132)	--	--	Small cytokines (intecrine/chemokine), interleukin-8 like	Interleukin-8 OS=Gallus gallus OX=9031 GN=CXCL8 PE=2 SV=1	S	Function unknown	permeability factor 2-like [Oncorhynchus mykiss]	biological process: immune system process (GO:0002376);; biological process: cellular process (GO:0009987);; biological process: locomotion (GO:0040011);; biological process: single-organism process (GO:0044699);; biological process: localization (GO:0051179);; cellular component: extracellular region (GO:0005576);; cellular component: extracellular region part (GO:0044421);; cellular component: …
gene30649	LOC110492704	6.11688	540	7.3221	502	8.15241	570	24.952	1623	33.1488	2085	25.458	1941	1.29128e-09	2.22241	up	--	--	--	K04730|8.1005e-60|dre:569226|K04730 interleukin-1 receptor-associated kinase 1 [EC:2.7.11.1] | (RefSeq) irak1; interleukin-1 receptor-associated kinase 1	Toll-like receptor signaling pathway (ko04620)	[T]	Signal transduction mechanisms	--	--	T	Signal transduction mechanisms	interleukin-1 receptor-associated kinase 1-like [Oncorhynchus mykiss]	--
gene24642	il-8	0.560277	23	0.618548	22	0.721124	27	559.612	17639	1195.94	41834	761.745	27927	1.12957e-17	10.6682	up	--	--	Biological Process: leukocyte migration involved in inflammatory response (GO:0002523);; Cellular Component: extracellular space (GO:0005615);; Cellular Component: cell (GO:0005623);; Biological Process: immune response (GO:0006955);; Molecular Function: chemokine activity (GO:0008009);; Biological Process: response to carbohydrate (GO:0009743);; Biological Process: positive regulation of superox…	K10030|5.83826e-34|dre:100002946|K10030 interleukin 8 | (RefSeq) cxcl8a, cxcl8, il8, si:dkey-151b16.2; chemokine (C-X-C motif) ligand 8a	Cytokine-cytokine receptor interaction (ko04060);; Toll-like receptor signaling pathway (ko04620);; NOD-like receptor signaling pathway (ko04621);; RIG-I-like receptor signaling pathway (ko04622);; AGE-RAGE signaling pathway in diabetic complications (ko04933);; Salmonella infection (ko05132)	--	--	Small cytokines (intecrine/chemokine), interleukin-8 like;; Pentapeptide repeats (8 copies)	Interleukin-8 OS=Gallus gallus OX=9031 GN=CXCL8 PE=2 SV=1	S	Function unknown	putative cxc chemokine precursor [Oncorhynchus mykiss]	biological process: immune system process (GO:0002376);; biological process: cellular process (GO:0009987);; biological process: locomotion (GO:0040011);; biological process: single-organism process (GO:0044699);; biological process: localization (GO:0051179);; cellular component: extracellular region (GO:0005576);; cellular component: extracellular region part (GO:0044421);; cellular component: …
gene7064	LOC110522049	16.9021	994	17.8145	926	18.1266	1011	279.5	14198	381.021	20194	357.618	20526	5.69036e-23	4.63795	up	[T]	Signal transduction mechanisms	Molecular Function: kinase activity (GO:0016301);; Biological Process: phosphorylation (GO:0016310);;	K04734|6.46945e-146|mze:101464752|K04734 NF-kappa-B inhibitor alpha | (RefSeq) NF-kappa-B inhibitor alpha-like	Apoptosis (ko04210);; Toll-like receptor signaling pathway (ko04620);; NOD-like receptor signaling pathway (ko04621);; RIG-I-like receptor signaling pathway (ko04622);; Cytosolic DNA-sensing pathway (ko04623);; Adipocytokine signaling pathway (ko04920);; Herpes simplex infection (ko05168)	[R]	General function prediction only	Ankyrin repeats (many copies);; Ankyrin repeats (3 copies);; Ankyrin repeats (many copies);; Ankyrin repeat;; Ankyrin repeat	NF-kappa-B inhibitor alpha OS=Gallus gallus OX=9031 GN=NFKBIA PE=2 SV=1	S	Function unknown	NF-kappa-B inhibitor alpha-like [Oncorhynchus mykiss]	molecular function: catalytic activity (GO:0003824);; biological process: metabolic process (GO:0008152);; biological process: cellular process (GO:0009987)
gene45413	LOC110509110	22.3002	672	12.6306	338	17.821	511	190.103	4910	154.684	4177	170.24	4996	4.43294e-21	3.63921	up	--	--	Molecular Function: chemokine receptor activity (GO:0004950);; Biological Process: chemotaxis (GO:0006935);; Biological Process: G-protein coupled receptor signaling pathway (GO:0007186);; Cellular Component: integral component of membrane (GO:0016021);; Biological Process: chemokine-mediated signaling pathway (GO:0070098);; Biological Process: lymphoid lineage cell migration into thymus (GO:0097…	K04184|1.2481e-70|mze:101478668|K04184 C-C chemokine receptor type 9 | (RefSeq) C-C chemokine receptor type 9-like	Cytokine-cytokine receptor interaction (ko04060);; Intestinal immune network for IgA production (ko04672)	[R]	General function prediction only	7 transmembrane receptor (rhodopsin family)	C-X-C chemokine receptor type 4-B OS=Xenopus laevis OX=8355 GN=cxcr4-b PE=2 SV=1	U	Intracellular trafficking, secretion, and vesicular transport	C-C chemokine receptor type 9-like [Oncorhynchus mykiss]	biological process: cellular process (GO:0009987);; biological process: signaling (GO:0023052);; biological process: single-organism process (GO:0044699);; biological process: response to stimulus (GO:0050896);; biological process: biological regulation (GO:0065007);; molecular function: signal transducer activity (GO:0004871);; molecular function: molecular transducer activity (GO:0060089);; bio…
gene17687	hspa8	2.13254	220	1.25931	115	2.94465	288	5.41207	483	4.35645	405	3.08898	311	0.00921177	1.38497	up	[O]	Posttranslational modification, protein turnover, chaperones	Molecular Function: ATP binding (GO:0005524);; Cellular Component: nucleus (GO:0005634);; Cellular Component: cytoplasm (GO:0005737);; Biological Process: response to heat (GO:0009408);; Cellular Component: membrane (GO:0016020);; Biological Process: response to cadmium ion (GO:0046686);; Biological Process: response to copper ion (GO:0046688);; Biological Process: response to arsenite ion (GO:19…	K03283|0|oaa:100080044|K03283 heat shock 70kDa protein 1/8 | (RefSeq) HSPA8; heat shock protein family A (Hsp70) member 8	Spliceosome (ko03040);; MAPK signaling pathway (ko04010);; Protein processing in endoplasmic reticulum (ko04141);; Endocytosis (ko04144);; Longevity regulating pathway - multiple species (ko04213);; Antigen processing and presentation (ko04612);; Estrogen signaling pathway (ko04915);; Legionellosis (ko05134);; Toxoplasmosis (ko05145);; Measles (ko05162);; Influenza A (ko05164);; Epstein-Barr viru…	[O]	Posttranslational modification, protein turnover, chaperones	Hsp70 protein;; MreB/Mbl protein;; NAD-specific glutamate dehydrogenase	Heat shock cognate 70 kDa protein OS=Oncorhynchus mykiss OX=8022 GN=hsc71 PE=2 SV=2	O	Posttranslational modification, protein turnover, chaperones	LOW QUALITY PROTEIN: heat shock cognate 70 kDa protein-like [Oncorhynchus mykiss]	molecular function: binding (GO:0005488);; cellular component: cell (GO:0005623);; cellular component: organelle (GO:0043226);; cellular component: cell part (GO:0044464);; biological process: response to stimulus (GO:0050896);; cellular component: membrane (GO:0016020)
gene1343	LOC110528805	2.84224	363	3.11378	355	1.7194	206	6.91319	766	9.72993	1152	7.35869	913	8.74045e-07	2.02406	up	--	--	Cellular Component: integral component of membrane (GO:0016021);;	K13073|3.20754e-49|mze:101471673|K13073 polymeric immunoglobulin receptor | (RefSeq) polymeric immunoglobulin receptor-like	Intestinal immune network for IgA production (ko04672)	--	--	Immunoglobulin V-set domain	--	S	Function unknown	polymeric immunoglobulin receptor-like isoform X1 [Oncorhynchus mykiss]	cellular component: membrane (GO:0016020);; cellular component: membrane part (GO:0044425)
gene5268	LOC110520024	10.4751	754	10.295	655	10.845	740	123.154	7652	100.507	6516	109.131	7662	1.02336e-20	3.75444	up	--	--	Biological Process: chemotaxis (GO:0006935);; Biological Process: G-protein coupled receptor signaling pathway (GO:0007186);; Cellular Component: integral component of membrane (GO:0016021);; Molecular Function: C-X-C chemokine receptor activity (GO:0016494);; Biological Process: regulation of cell migration (GO:0030334);; Molecular Function: ubiquitin binding (GO:0043130);; Biological Process: c…	K04189|1.32142e-176|tru:101066475|K04189 C-X-C chemokine receptor type 4 | (RefSeq) cxcr4; C-X-C motif chemokine receptor 4	Cytokine-cytokine receptor interaction (ko04060);; Endocytosis (ko04144);; Intestinal immune network for IgA production (ko04672)	[R]	General function prediction only	7 transmembrane receptor (rhodopsin family)	C-X-C chemokine receptor type 4-B OS=Xenopus laevis OX=8355 GN=cxcr4-b PE=2 SV=1	U	Intracellular trafficking, secretion, and vesicular transport	C-X-C chemokine receptor type 4-like [Salvelinus alpinus]	biological process: locomotion (GO:0040011);; biological process: response to stimulus (GO:0050896);; biological process: cellular process (GO:0009987);; biological process: signaling (GO:0023052);; biological process: single-organism process (GO:0044699);; biological process: biological regulation (GO:0065007);; cellular component: membrane (GO:0016020);; cellular component: membrane part (GO:00…
gene22306	dhx58	7.3269	854	7.69987	805	8.3169	928	46.3027	4694	56.1079	5907	30.8158	3527	1.38886e-07	2.87334	up	[L]	Replication, recombination and repair	Molecular Function: DNA binding (GO:0003677);; Molecular Function: double-stranded RNA binding (GO:0003725);; Molecular Function: helicase activity (GO:0004386);; Molecular Function: ATP binding (GO:0005524);; Biological Process: innate immune response (GO:0045087);; Cellular Component: perinuclear region of cytoplasm (GO:0048471);; Biological Process: immune response involved in response to exog…	K12649|0|mze:101468974|K12649 ATP-dependent RNA helicase DHX58 [EC:3.6.3.14] | (RefSeq) dhx58; DExH-box helicase 58	RIG-I-like receptor signaling pathway (ko04622)	[R]	General function prediction only	Type III restriction enzyme, res subunit;; Helicase conserved C-terminal domain;; DEAD/DEAH box helicase;; C-terminal domain of RIG-I	Endoribonuclease Dicer OS=Gallus gallus OX=9031 GN=DICER1 PE=2 SV=3	L	Replication, recombination and repair	probable ATP-dependent RNA helicase DHX58 isoform X2 [Oncorhynchus mykiss]	molecular function: binding (GO:0005488);; molecular function: catalytic activity (GO:0003824);; biological process: immune system process (GO:0002376);; biological process: response to stimulus (GO:0050896);; cellular component: cell (GO:0005623);; cellular component: cell part (GO:0044464)
gene45667	LOC110509557	8.87341	862	7.44862	661	6.94796	641	15.1012	1279	11.372	1091	13.362	1271	0.00461849	1.16327	up	--	--	Molecular Function: cytokine activity (GO:0005125);; Molecular Function: interleukin-1 receptor binding (GO:0005149);; Cellular Component: extracellular space (GO:0005615);; Biological Process: inflammatory response (GO:0006954);; Biological Process: immune response (GO:0006955);;	K04519|2.39017e-29|ola:101169209|K04519 interleukin 1 beta | (RefSeq) interleukin-1 beta-like	MAPK signaling pathway (ko04010);; Cytokine-cytokine receptor interaction (ko04060);; Toll-like receptor signaling pathway (ko04620);; NOD-like receptor signaling pathway (ko04621);; Cytosolic DNA-sensing pathway (ko04623);; AGE-RAGE signaling pathway in diabetic complications (ko04933);; Salmonella infection (ko05132);; Herpes simplex infection (ko05168)	--	--	Interleukin-1 / 18	Interleukin-1 beta OS=Oncorhynchus mykiss OX=8022 GN=il1b PE=2 SV=1	K	Transcription	interleukin-1 beta-like [Oncorhynchus mykiss]	molecular function: binding (GO:0005488);; cellular component: extracellular region (GO:0005576);; cellular component: extracellular region part (GO:0044421);; biological process: response to stimulus (GO:0050896);; biological process: immune system process (GO:0002376)
