# Supplementary material for: Innate and early immune responses to Yersinia ruckeri in the spleen of rainbow trout (Oncorhynchus mykiss)
Source: Research Square preprint supplement (doi:10.21203/rs.3.rs-219853/v1), 2021-02-23
Supplement: Supplementary file 4 [file 8d45ad4d267d798bd075ea33.xlsx]

## Sheet: Integrated_Function.anno
#GeneID	COG_class	COG_class_annotation	GO_annotation	KEGG_annotation	KEGG_pathway_annotation	KOG_class	KOG_class_annotation	Pfam_annotation	Swiss-Prot_annotation	eggNOG_class	eggNOG_class_annotation	NR_annotation
Oncorhynchus_mykiss_newGene_34023	--	--	--	--	--	--	--	--	--	S	Function unknown	PREDICTED: lanC-like protein 1 [Esox lucius]
gene115	--	--	Molecular Function: structural constituent of ribosome (GO:0003735);; Cellular Component: mitochondrial ribosome (GO:0005761);; Biological Process: translation (GO:0006412);;	K17428|2.93458e-58|tru:101074523|K17428 large subunit ribosomal protein L47 | (RefSeq) mrpl47; mitochondrial ribosomal protein L47	--	[J]	Translation, ribosomal structure and biogenesis	Mitochondrial 39-S ribosomal protein L47 (MRP-L47)	--	J	Translation, ribosomal structure and biogenesis	39S ribosomal protein L47, mitochondrial-like [Oncorhynchus mykiss]
gene50220	--	--	--	K19020|1.50241e-19|xma:102229692|K19020 stabilin-1 | (RefSeq) stabilin-1-like	--	[T]	Signal transduction mechanisms	--	--	S	Function unknown	stabilin-2-like [Oncorhynchus mykiss]
gene8202	--	--	Biological Process: protein transport (GO:0015031);; Cellular Component: integral component of membrane (GO:0016021);;	K19995|2.1175e-152|dre:402992|K19995 secretory carrier-associated membrane protein | (RefSeq) scamp1, zgc:77214; secretory carrier membrane protein 1	--	[U]	Intracellular trafficking, secretion, and vesicular transport	SCAMP family	Secretory carrier-associated membrane protein 5A OS=Xenopus laevis OX=8355 GN=scamp5-a PE=2 SV=1	U	Intracellular trafficking, secretion, and vesicular transport	secretory carrier-associated membrane protein 1-like [Oncorhynchus mykiss]
gene21426	--	--	--	K16526|0|dre:566920|K16526 A-kinase anchor protein 10 | (RefSeq) akap10, fc10g11, si:dkey-197m14.4, wu:fc10g11; A kinase (PRKA) anchor protein 10	--	[T]	Signal transduction mechanisms	Regulator of G protein signaling domain	--	S	Function unknown	A-kinase anchor protein 10, mitochondrial-like isoform X1 [Oncorhynchus mykiss]
gene44217	--	--	Biological Process: carbohydrate metabolic process (GO:0005975);; Cellular Component: membrane (GO:0016020);; Molecular Function: transferase activity, transferring hexosyl groups (GO:0016758);;	K00722|7.48369e-80|mze:101480789|K00722 globoside alpha-N-acetylgalactosaminyltransferase [EC:2.4.1.88] | (RefSeq) globoside alpha-1,3-N-acetylgalactosaminyltransferase 1	Glycosphingolipid biosynthesis - globo series (ko00603)	--	--	Glycosyltransferase family 6	Globoside alpha-1,3-N-acetylgalactosaminyltransferase 1 OS=Gallus gallus OX=9031 GN=GBGT1 PE=2 SV=1	O	Posttranslational modification, protein turnover, chaperones	globoside alpha-1,3-N-acetylgalactosaminyltransferase 1-like [Oncorhynchus mykiss]
gene35665	--	--	Molecular Function: DNA binding (GO:0003677);; Cellular Component: nucleus (GO:0005634);; Biological Process: positive regulation of transcription, DNA-templated (GO:0045893);;	--	--	--	--	Homeobox domain	--	K	Transcription	uncharacterized protein LOC110498100 isoform X1 [Oncorhynchus mykiss]
gene42558	[R]	General function prediction only	--	K11800|7.54273e-150|ola:101168827|K11800 WD repeat-containing protein 22 | (RefSeq) dcaf5; DDB1 and CUL4 associated factor 5	--	[R]	General function prediction only	WD domain, G-beta repeat	--	S	Function unknown	DDB1- and CUL4-associated factor 5-like [Oncorhynchus mykiss]
gene19101	--	--	--	K17494|0|mze:101477719|K17494 cysteine/serine-rich nuclear protein | (RefSeq) cysteine/serine-rich nuclear protein 1-like	--	[R]	General function prediction only	Cysteine/serine-rich nuclear protein N-terminus	--	S	Function unknown	cysteine/serine-rich nuclear protein 1-like [Oncorhynchus mykiss]
gene25103	--	--	Molecular Function: serine-type endopeptidase activity (GO:0004252);; Molecular Function: calcium ion binding (GO:0005509);; Cellular Component: extracellular region (GO:0005576);; Biological Process: proteolysis (GO:0006508);; Biological Process: blood coagulation (GO:0007596);;	--	--	--	--	Vitamin K-dependent carboxylation/gamma-carboxyglutamic (GLA) domain;; Trypsin;; EGF-like domain	Venom prothrombin activator vestarin-D1 OS=Demansia vestigiata OX=412038 PE=1 SV=1	O	Posttranslational modification, protein turnover, chaperones	coagulation factor X-like [Oncorhynchus mykiss]
gene7028	--	--	Cellular Component: extracellular region (GO:0005576);;	--	--	--	--	Zona pellucida-like domain	--	U	Intracellular trafficking, secretion, and vesicular transport	uncharacterized protein LOC110522007 [Oncorhynchus mykiss]
gene47263	--	--	Molecular Function: somatostatin receptor activity (GO:0004994);; Cellular Component: integral component of membrane (GO:0016021);; Biological Process: somatostatin signaling pathway (GO:0038170);;	K04221|6.38153e-77|mze:101470450|K04221 somatostatin receptor 5 | (RefSeq) somatostatin-like receptor F_48D10.1	Neuroactive ligand-receptor interaction (ko04080)	[R]	General function prediction only	7 transmembrane receptor (rhodopsin family);; Serpentine type 7TM GPCR chemoreceptor Srsx;; Serpentine type 7TM GPCR chemoreceptor Srx	Somatostatin-like receptor F_48D10.1 OS=Takifugu rubripes OX=31033 GN=F_48D10.1 PE=3 SV=1	U	Intracellular trafficking, secretion, and vesicular transport	somatostatin-like receptor F_48D10.1, partial [Oncorhynchus mykiss]
gene6914	[J]	Translation, ribosomal structure and biogenesis	Molecular Function: NAD+ ADP-ribosyltransferase activity (GO:0003950);;	K15260|2.56379e-59|mze:101480317|K15260 poly [ADP-ribose] polymerase 9 [EC:2.4.2.30] | (RefSeq) poly [ADP-ribose] polymerase 9-like	--	[BK]	Chromatin structure and dynamics;; Transcription	Macro domain	--	S	Function unknown	poly [ADP-ribose] polymerase 9-like isoform X1 [Oncorhynchus mykiss]
gene39955	--	--	--	K09098|3.86672e-99|ola:101164332|K09098 neuronal PAS domain-containing protein 1/3 | (RefSeq) npas1; neuronal PAS domain protein 1	--	[TK]	Signal transduction mechanisms;; Transcription	PAS fold	Single-minded homolog 1-A OS=Danio rerio OX=7955 GN=sim1a PE=2 SV=1	K	Transcription	uncharacterized protein LOC110503300 [Oncorhynchus mykiss]
gene31966	--	--	--	--	--	--	--	Protein of unknown function (DUF 659);; BED zinc finger	--	S	Function unknown	uncharacterized protein LOC110494259 [Oncorhynchus mykiss]
gene50543	--	--	--	--	--	--	--	NHS-like	--	S	Function unknown	Nance-Horan syndrome protein-like [Oncorhynchus mykiss]
gene29852	--	--	Cellular Component: integral component of membrane (GO:0016021);;	--	--	[S]	Function unknown	Na,K-Atpase Interacting protein	Sodium/potassium-transporting ATPase subunit beta-1-interacting protein 4 OS=Xenopus laevis OX=8355 GN=nkain4 PE=2 SV=1	U	Intracellular trafficking, secretion, and vesicular transport	sodium/potassium-transporting ATPase subunit beta-1-interacting protein 4-like isoform X2 [Oncorhynchus mykiss]
Oncorhynchus_mykiss_newGene_23013	--	--	--	--	--	--	--	Fibronectin type III domain	--	--	--	fibronectin-like, partial [Oncorhynchus mykiss]
gene4780	[T]	Signal transduction mechanisms	Molecular Function: guanylate cyclase activity (GO:0004383);; Molecular Function: protein kinase activity (GO:0004672);; Molecular Function: ATP binding (GO:0005524);; Cellular Component: intracellular (GO:0005622);; Biological Process: cGMP biosynthetic process (GO:0006182);; Biological Process: protein phosphorylation (GO:0006468);; Cellular Component: integral component of membrane (GO:0016021…	K12323|0|dre:555911|K12323 atrial natriuretic peptide receptor A [EC:4.6.1.2] | (RefSeq) npr1b; natriuretic peptide receptor 1b	--	[T]	Signal transduction mechanisms	Adenylate and Guanylate cyclase catalytic domain;; Protein tyrosine kinase;; Protein kinase domain;; Receptor family ligand binding region	Atrial natriuretic peptide receptor 2 OS=Anguilla japonica OX=7937 GN=npr2 PE=2 SV=1	T	Signal transduction mechanisms	atrial natriuretic peptide receptor 1 [Oncorhynchus mykiss]
Oncorhynchus_mykiss_newGene_23684	--	--	--	K19525|3.78134e-28|mze:101476700|K19525 vacuolar protein sorting-associated protein 13A/C | (RefSeq) vps13a; vacuolar protein sorting 13 homolog A	--	[U]	Intracellular trafficking, secretion, and vesicular transport	Vacuolar-sorting-associated 13 protein C-terminal	--	U	Intracellular trafficking, secretion, and vesicular transport	PREDICTED: vacuolar protein sorting-associated protein 13A-like [Haplochromis burtoni]
gene26994	--	--	Cellular Component: COP9 signalosome (GO:0008180);; Biological Process: protein deneddylation (GO:0010388);;	K12179|0|mze:101478176|K12179 COP9 signalosome complex subunit 6 | (RefSeq) cops6; COP9 signalosome subunit 6	--	[OT]	Posttranslational modification, protein turnover, chaperones;; Signal transduction mechanisms	Maintenance of mitochondrial structure and function;; JAB1/Mov34/MPN/PAD-1 ubiquitin protease	COP9 signalosome complex subunit 6 OS=Xenopus laevis OX=8355 GN=cops6 PE=2 SV=1	S	Function unknown	COP9 signalosome complex subunit 6 isoform X2 [Oncorhynchus kisutch]
gene21987	--	--	--	--	--	--	--	CHCH-CHCH-like Cx9C, IMS import disulfide relay-system,	--	S	Function unknown	coiled-coil-helix-coiled-coil-helix domain-containing protein 5-like, partial [Oncorhynchus mykiss]
gene26376	[T]	Signal transduction mechanisms	Molecular Function: protein serine/threonine kinase activity (GO:0004674);; Molecular Function: ATP binding (GO:0005524);; Biological Process: protein phosphorylation (GO:0006468);;	K08823|0|xma:102223013|K08823 CDC-like kinase [EC:2.7.12.1] | (RefSeq) clk2; CDC like kinase 2	--	[T]	Signal transduction mechanisms	Protein kinase domain;; Protein tyrosine kinase	Dual specificity tyrosine-phosphorylation-regulated kinase 2 OS=Gallus gallus OX=9031 GN=DYRK2 PE=2 SV=1	T	Signal transduction mechanisms	dual specificity protein kinase CLK2-like [Oncorhynchus mykiss]
gene53469	--	--	--	K08229|1.20997e-111|mze:101471178|K08229 MFS transporter, LAT3 family, solute carrier family 43, member 2 | (RefSeq) large neutral amino acids transporter small subunit 4-like	--	--	--	--	Large neutral amino acids transporter small subunit 4 OS=Xenopus tropicalis OX=8364 GN=slc43a2 PE=2 SV=1	U	Intracellular trafficking, secretion, and vesicular transport	large neutral amino acids transporter small subunit 4-like, partial [Oncorhynchus mykiss]
gene40187	--	--	--	--	--	--	--	Cdc42 effector;; P21-Rho-binding domain	--	S	Function unknown	cdc42 effector protein 2-like [Oncorhynchus mykiss]
gene52927	--	--	--	--	--	--	--	Domain of unknown function (DUF4553)	--	K	Transcription	serine/arginine repetitive matrix protein 2-like [Oncorhynchus mykiss]
gene21495	--	--	--	K11825|0|dre:334632|K11825 AP-2 complex subunit beta-1 | (RefSeq) ap2b1, fa16e07, wu:fa16c06, wu:fa16e07, wu:fc18c08, zgc:55659; adaptor-related protein complex 2, beta 1 subunit	Endocytosis (ko04144)	[U]	Intracellular trafficking, secretion, and vesicular transport	Adaptin N terminal region;; non-SMC mitotic condensation complex subunit 1;; Beta2-adaptin appendage, C-terminal sub-domain;; HEAT repeats;; HEAT repeat;; Adaptin C-terminal domain;; Armadillo/beta-catenin-like repeat;; Nuclear condensing complex subunits, C-term domain	--	U	Intracellular trafficking, secretion, and vesicular transport	PREDICTED: AP-1 complex subunit beta-1 isoform X1 [Salmo salar]
gene50225	--	--	Biological Process: glomerular filtration (GO:0003094);; Molecular Function: motor activity (GO:0003774);; Molecular Function: ATP binding (GO:0005524);; Molecular Function: kinase activity (GO:0016301);; Biological Process: phosphorylation (GO:0016310);; Cellular Component: myosin complex (GO:0016459);; Biological Process: glomerulus development (GO:0032835);;	K10356|6.78517e-41|xma:102222560|K10356 myosin I | (RefSeq) unconventional myosin-Ie-like	--	[Z]	Cytoskeleton	Myosin head (motor domain);; Hepatitis C virus non-structural 5a protein membrane anchor	Unconventional myosin-Ic OS=Gallus gallus OX=9031 GN=MYO1C PE=2 SV=1	Z	Cytoskeleton	unconventional myosin-If-like, partial [Oncorhynchus mykiss]
gene27523	--	--	Molecular Function: protein dimerization activity (GO:0046983);;	--	--	[K]	Transcription	Helix-loop-helix DNA-binding domain	Transcription factor 21 OS=Danio rerio OX=7955 GN=tcf21 PE=2 SV=1	K	Transcription	transcription factor 24 isoform X1 [Oncorhynchus mykiss]
gene7942	--	--	--	--	--	[T]	Signal transduction mechanisms	Laminin EGF domain;; Human growth factor-like EGF;; EGF-like domain	Multiple epidermal growth factor-like domains protein 10 OS=Xenopus tropicalis OX=8364 GN=megf10 PE=2 SV=1	S	Function unknown	multiple epidermal growth factor-like domains protein 10 [Oncorhynchus mykiss]
gene11725	--	--	Cellular Component: intracellular (GO:0005622);; Biological Process: protein targeting to vacuole (GO:0006623);; Cellular Component: integral component of membrane (GO:0016021);; Cellular Component: extrinsic component of membrane (GO:0019898);; Biological Process: protein retention in Golgi apparatus (GO:0045053);;	K19525|3.71771e-51|mmu:320528|K19525 vacuolar protein sorting-associated protein 13A/C | (RefSeq) Vps13c, AI552542, AV026040, C230055H22Rik, W51662, chorein; vacuolar protein sorting 13C	--	[U]	Intracellular trafficking, secretion, and vesicular transport	Vacuolar-sorting-associated 13 protein C-terminal	--	U	Intracellular trafficking, secretion, and vesicular transport	vacuolar protein sorting-associated protein 13C-like, partial [Oncorhynchus mykiss]
gene19053	--	--	Molecular Function: nucleotide binding (GO:0000166);; Molecular Function: nucleic acid binding (GO:0003676);; Cellular Component: nucleus (GO:0005634);; Molecular Function: zinc ion binding (GO:0008270);; Biological Process: RNA splicing (GO:0008380);;	--	--	--	--	RNA recognition motif. (a.k.a. RRM, RBD, or RNP domain)	--	S	Function unknown	uncharacterized protein LOC110533214 [Oncorhynchus mykiss]
Oncorhynchus_mykiss_newGene_25677	[R]	General function prediction only	Molecular Function: magnesium ion binding (GO:0000287);; Molecular Function: protein serine/threonine kinase activity (GO:0004674);; Molecular Function: ATP binding (GO:0005524);; Cellular Component: intracellular (GO:0005622);; Biological Process: protein phosphorylation (GO:0006468);; Biological Process: intracellular signal transduction (GO:0035556);;	K04373|3.59429e-45|ola:101165012|K04373 ribosomal protein S6 kinase alpha-1/2/3/6 [EC:2.7.11.1] | (RefSeq) ribosomal protein S6 kinase alpha-3-like	MAPK signaling pathway (ko04010);; Oocyte meiosis (ko04114);; mTOR signaling pathway (ko04150);; Progesterone-mediated oocyte maturation (ko04914)	[T]	Signal transduction mechanisms	Protein kinase domain;; Protein tyrosine kinase	Ribosomal protein S6 kinase alpha-6 OS=Danio rerio OX=7955 GN=rps6ka6 PE=2 SV=1	T	Signal transduction mechanisms	ribosomal protein S6 kinase alpha-3-like [Oncorhynchus mykiss]
gene7479	--	--	--	--	--	[O]	Posttranslational modification, protein turnover, chaperones	Bromodomain	Tyrosine-protein kinase BAZ1B OS=Danio rerio OX=7955 GN=baz1b PE=1 SV=2	O	Posttranslational modification, protein turnover, chaperones	ATPase family AAA domain-containing protein 2B isoform X1 [Oncorhynchus kisutch]
gene36443	--	--	Cellular Component: intracellular (GO:0005622);; Biological Process: intracellular protein transport (GO:0006886);;	--	--	[U]	Intracellular trafficking, secretion, and vesicular transport	VHS domain;; GAT domain	TOM1-like protein 2 OS=Xenopus laevis OX=8355 GN=tom1l2 PE=2 SV=1	S	Function unknown	TOM1-like protein 2 isoform X1 [Oncorhynchus mykiss]
gene27112	--	--	Cellular Component: nucleus (GO:0005634);; Biological Process: regulation of transcription, DNA-templated (GO:0006355);; Molecular Function: sequence-specific DNA binding (GO:0043565);;	K09341|9.59414e-57|pbi:103064693|K09341 homeobox protein MSX | (RefSeq) MSX2; msh homeobox 2	--	[R]	General function prediction only	Homeobox domain	Homeobox protein MSX-2 OS=Coturnix japonica OX=93934 GN=MSX2 PE=2 SV=1	K	Transcription	homeobox protein MSH-D-like isoform X1 [Oncorhynchus mykiss]
gene49868	[R]	General function prediction only	--	K00355|3.45005e-116|mze:101474067|K00355 NAD(P)H dehydrogenase (quinone) [EC:1.6.5.2] | (RefSeq) NAD(P)H dehydrogenase [quinone] 1	Ubiquinone and other terpenoid-quinone biosynthesis (ko00130)	--	--	Flavodoxin-like fold;; NADPH-dependent FMN reductase	--	S	Function unknown	ribosyldihydronicotinamide dehydrogenase [quinone] [Oncorhynchus mykiss]
gene10508	[J]	Translation, ribosomal structure and biogenesis	Molecular Function: nucleotide binding (GO:0000166);; Molecular Function: nucleic acid binding (GO:0003676);;	K21123|6.03278e-94|dre:405835|K21123 splicing factor, arginine/serine-rich 9 | (RefSeq) srsf9, zgc:77449; serine/arginine-rich splicing factor 9	Spliceosome (ko03040);; Herpes simplex infection (ko05168)	[A]	RNA processing and modification	RNA recognition motif. (a.k.a. RRM, RBD, or RNP domain)	Serine/arginine-rich splicing factor 1 OS=Gallus gallus OX=9031 GN=SRSF1 PE=1 SV=3	S	Function unknown	serine/arginine-rich splicing factor 9-like isoform X1 [Oncorhynchus mykiss]
Oncorhynchus_mykiss_newGene_64482	--	--	--	--	--	--	--	Coiled-coil region of CCDC155 or KASH	--	--	--	PREDICTED: uncharacterized protein LOC108927782 isoform X2 [Scleropages formosus]
gene7521	--	--	Cellular Component: integral component of membrane (GO:0016021);;	--	--	--	--	Immunoglobulin V-set domain	--	S	Function unknown	uncharacterized protein LOC110522480 [Oncorhynchus mykiss]
gene15106	[G]	Carbohydrate transport and metabolism	Cellular Component: intracellular (GO:0005622);; Biological Process: water transport (GO:0006833);; Molecular Function: ammonium transmembrane transporter activity (GO:0008519);; Molecular Function: water channel activity (GO:0015250);; Cellular Component: integral component of membrane (GO:0016021);; Cellular Component: brush border membrane (GO:0031526);; Biological Process: carbon dioxide tran…	K09864|1.16001e-118|tru:101079855|K09864 aquaporin-1 | (RefSeq) aquaporin-1-like	--	[G]	Carbohydrate transport and metabolism	Major intrinsic protein	Aquaporin FA-CHIP OS=Pelophylax esculentus OX=8401 GN=AQPA PE=2 SV=1	G	Carbohydrate transport and metabolism	aquaporin-1-like [Oncorhynchus mykiss]
gene30463	[X]	--	--	K05695|2.37115e-150|ola:101174566|K05695 receptor-type tyrosine-protein phosphatase F [EC:3.1.3.48] | (RefSeq) receptor-type tyrosine-protein phosphatase F-like	Cell adhesion molecules (CAMs) (ko04514);; Adherens junction (ko04520);; Insulin signaling pathway (ko04910)	[T]	Signal transduction mechanisms	Fibronectin type III domain;; Purple acid Phosphatase, N-terminal domain;; Interferon-alpha/beta receptor, fibronectin type III	Receptor-type tyrosine-protein phosphatase F OS=Danio rerio OX=7955 GN=ptprf PE=2 SV=1	T	Signal transduction mechanisms	receptor-type tyrosine-protein phosphatase F-like [Oncorhynchus mykiss]
gene13576	[K]	Transcription	--	--	--	--	--	NACHT domain;; Fish-specific NACHT associated domain;; Leucine Rich repeat;; SPRY-associated domain;; SPRY domain	Neoverrucotoxin subunit beta OS=Synanceia verrucosa OX=51996 PE=1 SV=1	S	Function unknown	NACHT, LRR and PYD domains-containing protein 12-like isoform X1 [Oncorhynchus mykiss]
gene27242	--	--	Molecular Function: structural molecule activity (GO:0005198);; Cellular Component: cytosol (GO:0005829);; Cellular Component: adherens junction (GO:0005912);; Biological Process: actin filament organization (GO:0007015);; Molecular Function: beta-catenin binding (GO:0008013);; Cellular Component: actin cytoskeleton (GO:0015629);; Molecular Function: cadherin binding (GO:0045296);; Molecular Func…	K05691|4.5797e-47|tru:101070071|K05691 catenin alpha | (RefSeq) ctnna1; catenin alpha 1	Adherens junction (ko04520);; Tight junction (ko04530)	[W]	Extracellular structures	Vinculin family	Catenin alpha-2 OS=Xenopus tropicalis OX=8364 GN=ctnna2 PE=2 SV=1	S	Function unknown	unnamed protein product [Oncorhynchus mykiss]
gene42960	--	--	Molecular Function: iron ion binding (GO:0005506);; Molecular Function: steroid hydroxylase activity (GO:0008395);; Cellular Component: integral component of membrane (GO:0016021);; Molecular Function: oxidoreductase activity, acting on paired donors, with incorporation or reduction of molecular oxygen, reduced flavin or flavoprotein as one donor, and incorporation of one atom of oxygen (GO:00167…	K17858|1.1212e-33|tru:101064069|K17858 cytochrome P450 family 2 subfamily X | (RefSeq) cytochrome P450 2F2-like	--	[Q]	Secondary metabolites biosynthesis, transport and catabolism	Cytochrome P450;; Cytochrome P450	Cytochrome P450 2K1 OS=Oncorhynchus mykiss OX=8022 GN=cyp2k1 PE=2 SV=1	Q	Secondary metabolites biosynthesis, transport and catabolism	cytochrome P450 2D9-like [Oncorhynchus mykiss]
gene46018	[O]	Posttranslational modification, protein turnover, chaperones	Cellular Component: membrane (GO:0016020);;	--	--	[C]	Energy production and conversion	SPFH domain / Band 7 family;; C-terminal region of band_7	--	O	Posttranslational modification, protein turnover, chaperones	stomatin-like protein 2, mitochondrial [Oncorhynchus mykiss]
gene10335	--	--	--	--	--	--	--	--	--	--	--	uncharacterized protein LOC110525362 [Oncorhynchus mykiss]
gene30345	--	--	--	K04860|5.8271e-38|mze:101467919|K04860 voltage-dependent calcium channel alpha-2/delta-3 | (RefSeq) voltage-dependent calcium channel subunit alpha-2/delta-3-like	MAPK signaling pathway (ko04010);; Cardiac muscle contraction (ko04260);; Adrenergic signaling in cardiomyocytes (ko04261)	--	--	--	--	S	Function unknown	voltage-dependent calcium channel subunit alpha-2/delta-3-like [Oncorhynchus mykiss]
gene6085	--	--	--	K10955|0|mze:101471083|K10955 intestinal mucin-2 | (RefSeq) mucin-2-like	--	[WV]	Extracellular structures;; Defense mechanisms	C8 domain;; Cystine-knot domain;; von Willebrand factor type D domain;; Trypsin Inhibitor like cysteine rich domain	Mucin-5B OS=Gallus gallus OX=9031 GN=MUC5B PE=1 SV=1	O	Posttranslational modification, protein turnover, chaperones	intestinal mucin-like protein [Oncorhynchus mykiss]
Oncorhynchus_mykiss_newGene_54698	--	--	--	--	--	--	--	--	--	S	Function unknown	PREDICTED: LIM and senescent cell antigen-like-containing domain protein 1 isoform X1 [Esox lucius]
gene8649	--	--	--	--	--	[U]	Intracellular trafficking, secretion, and vesicular transport	C2 domain;; FYVE-type zinc finger	Synaptotagmin-B OS=Diplobatis ommata OX=1870830 GN=P65-B PE=1 SV=1	S	Function unknown	rabphilin-3A-like [Salvelinus alpinus]
gene31862	[T]	Signal transduction mechanisms	Biological Process: acyl-CoA metabolic process (GO:0006637);; Molecular Function: thiolester hydrolase activity (GO:0016790);;	K01068|0|tru:101077058|K01068 acyl-coenzyme A thioesterase 1/2/4 [EC:3.1.2.2] | (RefSeq) acyl-coenzyme A thioesterase 4-like	Fatty acid elongation (ko00062);; Biosynthesis of unsaturated fatty acids (ko01040)	--	--	BAAT / Acyl-CoA thioester hydrolase C terminal;; Acyl-CoA thioester hydrolase/BAAT N-terminal region;; Dienelactone hydrolase family;; Prolyl oligopeptidase family	--	S	Function unknown	acyl-coenzyme A thioesterase 1-like [Oncorhynchus mykiss]
gene17431	--	--	--	--	--	[K]	Transcription	HIT zinc finger	--	S	Function unknown	zinc finger HIT domain-containing protein 3 [Oncorhynchus mykiss]
gene45690	[J]	Translation, ribosomal structure and biogenesis	Molecular Function: GTPase activity (GO:0003924);; Molecular Function: GTP binding (GO:0005525);; Cellular Component: mitochondrion (GO:0005739);; Biological Process: mitochondrial translation (GO:0032543);; Biological Process: ribosome disassembly (GO:0032790);;	K02355|0|mze:101481737|K02355 elongation factor G | (RefSeq) gfm2; G elongation factor mitochondrial 2	--	[J]	Translation, ribosomal structure and biogenesis	Elongation factor Tu GTP binding domain;; Elongation Factor G, domain II;; Elongation factor G C-terminus;; Elongation factor Tu domain 2;; Elongation factor G, domain IV;; 50S ribosome-binding GTPase	Ribosome-releasing factor 2, mitochondrial OS=Danio rerio OX=7955 GN=gfm2 PE=2 SV=2	J	Translation, ribosomal structure and biogenesis	ribosome-releasing factor 2, mitochondrial [Oncorhynchus mykiss]
gene5410	[O]	Posttranslational modification, protein turnover, chaperones	Molecular Function: serine-type endopeptidase activity (GO:0004252);; Molecular Function: scavenger receptor activity (GO:0005044);; Biological Process: proteolysis (GO:0006508);; Cellular Component: integral component of membrane (GO:0016021);;	K09634|0|dre:100000148|K09634 transmembrane protease serine 3 [EC:3.4.21.-] | (RefSeq) tmprss3a, si:ch211-140m22.3, si:dkey-281i8.4; transmembrane protease, serine 3a	--	[E]	Amino acid transport and metabolism	Trypsin;; Scavenger receptor cysteine-rich domain;; Low-density lipoprotein receptor domain class A;; Scavenger receptor cysteine-rich domain	Ovochymase-2 OS=Bufo japonicus OX=8387 GN=OVCH2 PE=1 SV=1	O	Posttranslational modification, protein turnover, chaperones	transmembrane protease serine 3-like [Oncorhynchus mykiss]
gene45248	--	--	Biological Process: regulation of apoptotic process (GO:0042981);;	K02561|2.29787e-97|mze:101480739|K02561 Bcl-2-related ovarian killer protein | (RefSeq) bcl-2-related ovarian killer protein homolog B-like	--	[T]	Signal transduction mechanisms	Apoptosis regulator proteins, Bcl-2 family	Bcl-2-related ovarian killer protein homolog A OS=Danio rerio OX=7955 GN=boka PE=2 SV=1	U	Intracellular trafficking, secretion, and vesicular transport	bcl-2-related ovarian killer protein homolog A-like isoform X1 [Oncorhynchus mykiss]
gene4958	--	--	Molecular Function: transcription factor activity, sequence-specific DNA binding (GO:0003700);; Cellular Component: nucleus (GO:0005634);; Biological Process: regulation of transcription, DNA-templated (GO:0006355);; Molecular Function: sequence-specific DNA binding (GO:0043565);;	K09436|0|mze:101473512|K09436 friend leukemia integration 1 transcription factor | (RefSeq) retroviral integration site protein Fli-1 homolog	--	[K]	Transcription	Ets-domain;; Sterile alpha motif (SAM)/Pointed domain	Retroviral integration site protein Fli-1 homolog OS=Xenopus laevis OX=8355 GN=fli1 PE=2 SV=1	K	Transcription	Friend leukemia integration 1 transcription factor-like isoform X1 [Oncorhynchus mykiss]
gene52742	--	--	Molecular Function: structural constituent of ribosome (GO:0003735);; Cellular Component: ribosome (GO:0005840);; Biological Process: translation (GO:0006412);;	K02882|1.88415e-38|dre:394035|K02882 large subunit ribosomal protein L18Ae | (RefSeq) rpl18a, rpl-20Co, zgc:56546; ribosomal protein L18a	Ribosome (ko03010)	[J]	Translation, ribosomal structure and biogenesis	Ribosomal proteins 50S-L18Ae/60S-L20/60S-L18A	60S ribosomal protein L18a OS=Salmo salar OX=8030 GN=rpl18a PE=2 SV=1	J	Translation, ribosomal structure and biogenesis	unnamed protein product, partial [Oncorhynchus mykiss]
gene11525	[T]	Signal transduction mechanisms	--	--	--	[M]	Cell wall/membrane/envelope biogenesis	Ankyrin repeats (many copies);; Ankyrin repeats (3 copies);; Ankyrin repeats (many copies);; Ankyrin repeat;; Ankyrin repeat;; Death domain	Kinase D-interacting substrate of 220 kDa B OS=Danio rerio OX=7955 GN=kidins220b PE=1 SV=3	S	Function unknown	ankyrin repeat and death domain-containing protein 1A-like [Oncorhynchus kisutch]
gene36864	--	--	Molecular Function: hydrolase activity (GO:0016787);;	K05694|0|xma:102230353|K05694 receptor-type tyrosine-protein phosphatase beta [EC:3.1.3.48] | (RefSeq) receptor-type tyrosine-protein phosphatase beta-like	Adherens junction (ko04520)	[T]	Signal transduction mechanisms	Fibronectin type III domain;; Fibronectin type III domain	Tenascin-R OS=Gallus gallus OX=9031 GN=TNR PE=1 SV=1	T	Signal transduction mechanisms	receptor-type tyrosine-protein phosphatase beta-like [Oncorhynchus mykiss]
gene51983	--	--	--	K08131|2.7697e-55|tru:101075002|K08131 collagen, type IX, alpha | (RefSeq) collagen alpha-1(IX) chain-like	Focal adhesion (ko04510);; ECM-receptor interaction (ko04512)	[W]	Extracellular structures	Collagen triple helix repeat (20 copies);; Collagen triple helix repeat (20 copies);; Laminin G domain	Collagen alpha-1(IX) chain OS=Gallus gallus OX=9031 GN=COL9A1 PE=1 SV=4	S	Function unknown	collagen alpha-1(IX) chain-like [Oncorhynchus mykiss]
gene6841	--	--	--	K16687|2.1993e-88|cmk:103184440|K16687 transcriptional coactivator YAP1 | (RefSeq) wwtr1; WW domain containing transcription regulator 1	--	[O]	Posttranslational modification, protein turnover, chaperones	WW domain	Transcriptional coactivator YAP1 OS=Oryzias latipes OX=8090 GN=yap1 PE=1 SV=2	K	Transcription	WW domain-containing transcription regulator protein 1-like isoform X1 [Oncorhynchus mykiss]
gene8793	[R]	General function prediction only	Molecular Function: nucleic acid binding (GO:0003676);; Molecular Function: metal ion binding (GO:0046872);;	K17846|4.56707e-174|mze:101467769|K17846 krueppel-like factor 4 | (RefSeq) klf4; Kruppel like factor 4	--	[R]	General function prediction only	Zinc finger, C2H2 type	Transcription factor Sp9 OS=Danio rerio OX=7955 GN=sp9 PE=2 SV=1	S	Function unknown	unnamed protein product [Oncorhynchus mykiss]
gene47116	--	--	Molecular Function: motor activity (GO:0003774);; Molecular Function: ATP binding (GO:0005524);; Molecular Function: kinase activity (GO:0016301);; Biological Process: phosphorylation (GO:0016310);; Cellular Component: myosin complex (GO:0016459);;	K10356|0|ola:101165713|K10356 myosin I | (RefSeq) unconventional myosin-Ie-like	--	[Z]	Cytoskeleton	Myosin head (motor domain)	Unconventional myosin-Ic OS=Gallus gallus OX=9031 GN=MYO1C PE=2 SV=1	Z	Cytoskeleton	unconventional myosin-Ie-like [Oncorhynchus mykiss]
gene4927	[M]	Cell wall/membrane/envelope biogenesis	Molecular Function: serine-type endopeptidase inhibitor activity (GO:0004867);; Cellular Component: proteinaceous extracellular matrix (GO:0005578);; Biological Process: negative regulation of endopeptidase activity (GO:0010951);;	--	--	[T]	Signal transduction mechanisms	Collagen triple helix repeat (20 copies);; von Willebrand factor type A domain;; von Willebrand factor type A domain;; Kunitz/Bovine pancreatic trypsin inhibitor domain	Collagen alpha-2(VI) chain OS=Gallus gallus OX=9031 GN=COL6A2 PE=2 SV=1	S	Function unknown	collagen alpha-1(XXVIII) chain-like [Oncorhynchus mykiss]
Oncorhynchus_mykiss_newGene_43511	--	--	--	K17759|2.25598e-07|pss:102458655|K17759 NAD(P)H-hydrate epimerase [EC:5.1.99.6] | (RefSeq) NAXE, APOA1BP; NAD(P)HX epimerase	--	--	--	--	--	--	--	PREDICTED: LOW QUALITY PROTEIN: NAD(P)H-hydrate epimerase [Pelodiscus sinensis]
gene11223	--	--	Molecular Function: nucleic acid binding (GO:0003676);; Molecular Function: metal ion binding (GO:0046872);;	--	--	[R]	General function prediction only	C2H2-type zinc finger;; Zinc finger, C2H2 type;; Zinc-finger of C2H2 type	Ras-responsive element-binding protein 1 OS=Gallus gallus OX=9031 GN=RREB1 PE=2 SV=2	S	Function unknown	zinc finger protein 821-like isoform X3 [Oncorhynchus mykiss]
gene11814	[J]	Translation, ribosomal structure and biogenesis	Molecular Function: structural constituent of ribosome (GO:0003735);; Cellular Component: ribosome (GO:0005840);; Biological Process: translation (GO:0006412);;	K02910|7.51527e-69|ola:101174896|K02910 large subunit ribosomal protein L31e | (RefSeq) rpl31; ribosomal protein L31	Ribosome (ko03010)	[J]	Translation, ribosomal structure and biogenesis	Ribosomal protein L31e	60S ribosomal protein L31 OS=Paralichthys olivaceus OX=8255 GN=rpl31 PE=2 SV=1	J	Translation, ribosomal structure and biogenesis	60S ribosomal protein L31 [Salmo salar]
Oncorhynchus_mykiss_newGene_19436	--	--	Biological Process: somitogenesis (GO:0001756);; Molecular Function: DNA binding (GO:0003677);; Biological Process: regulation of transcription from RNA polymerase II promoter (GO:0006357);; Biological Process: regulation of DNA-templated transcription, elongation (GO:0032784);; Biological Process: embryonic heart tube development (GO:0035050);; Biological Process: negative regulation of histone …	K11292|1.35379e-42|tru:101074065|K11292 transcription elongation factor SPT6 | (RefSeq) supt6h; SPT6 homolog, histone chaperone	--	[A]	RNA processing and modification	--	Transcription elongation factor SPT6 OS=Danio rerio OX=7955 GN=supt6h PE=1 SV=1	K	Transcription	PREDICTED: transcription elongation factor SPT6-like [Salmo salar]
Oncorhynchus_mykiss_newGene_16595	--	--	Molecular Function: receptor binding (GO:0005102);;	K05450|8.4244e-23|ptg:102949957|K05450 platelet derived growth factor C/D | (RefSeq) PDGFD; platelet derived growth factor D	EGFR tyrosine kinase inhibitor resistance (ko01521);; Ras signaling pathway (ko04014);; Rap1 signaling pathway (ko04015);; Phospholipase D signaling pathway (ko04072);; PI3K-Akt signaling pathway (ko04151);; Focal adhesion (ko04510);; Gap junction (ko04540);; Regulation of actin cytoskeleton (ko04810);; Prostate cancer (ko05215);; Melanoma (ko05218);; Choline metabolism in cancer (ko05231)	--	--	--	Platelet-derived growth factor C OS=Gallus gallus OX=9031 GN=PDGFC PE=2 SV=1	A	RNA processing and modification	platelet-derived growth factor D-like isoform X1 [Oncorhynchus kisutch]
gene14133	[HT]	Coenzyme transport and metabolism;; Signal transduction mechanisms	--	K08869|6.19711e-160|dre:437001|K08869 aarF domain-containing kinase | (RefSeq) adck3, cabc1, coq8a, zgc:92578; aarF domain containing kinase 3	--	[R]	General function prediction only	ABC1 family	Atypical kinase COQ8A, mitochondrial OS=Danio rerio OX=7955 GN=coq8a PE=2 SV=2	S	Function unknown	PREDICTED: atypical kinase ADCK3, mitochondrial-like isoform X1 [Salmo salar]
gene16147	--	--	Cellular Component: cytoplasm (GO:0005737);; Biological Process: negative regulation of signal transduction (GO:0009968);;	--	--	--	--	RTP801 C-terminal region	DNA damage-inducible transcript 4 protein OS=Xenopus tropicalis OX=8364 GN=ddit4 PE=2 SV=1	S	Function unknown	DNA damage-inducible transcript 4-like protein [Oncorhynchus mykiss]
gene5243	--	--	--	K19680|0|dre:393572|K19680 TRAF3-interacting protein 1 | (RefSeq) traf3ip1, Elipsa, zgc:63522; TNF receptor-associated factor 3 interacting protein 1	--	[Z]	Cytoskeleton	Microtubule-binding protein MIP-T3	TRAF3-interacting protein 1 OS=Danio rerio OX=7955 GN=traf3ip1 PE=2 SV=1	S	Function unknown	TRAF3-interacting protein 1-like isoform X1 [Oncorhynchus mykiss]
gene30130	--	--	Biological Process: skeletal muscle contraction (GO:0003009);; Molecular Function: protein binding (GO:0005515);; Cellular Component: intracellular (GO:0005622);; Biological Process: skeletal muscle tissue development (GO:0007519);; Biological Process: intracellular signal transduction (GO:0035556);; Molecular Function: metal ion binding (GO:0046872);;	--	--	--	--	Variant SH3 domain;; SH3 domain;; Variant SH3 domain;; Phorbol esters/diacylglycerol binding domain (C1 domain);; Unstructured on SH3 and cysteine-rich domain-containing protein 2	SH3 and cysteine-rich domain-containing protein 3 OS=Danio rerio OX=7955 GN=stac3 PE=1 SV=1	S	Function unknown	SH3 and cysteine-rich domain-containing protein 3-like isoform X1 [Oncorhynchus mykiss]
gene37748	--	--	Cellular Component: integral component of membrane (GO:0016021);;	--	--	--	--	Immunoglobulin I-set domain;; Immunoglobulin domain;; Immunoglobulin domain	Leucine-rich repeat and fibronectin type III domain-containing protein 1-like protein OS=Danio rerio OX=7955 GN=lrfn1l PE=2 SV=1	U	Intracellular trafficking, secretion, and vesicular transport	microfibrillar-associated protein 3-like [Oncorhynchus mykiss]
gene19590	--	--	--	K03917|5.20243e-141|tru:101071398|K03917 coagulation factor XIII A1 polypeptide [EC:2.3.2.13] | (RefSeq) coagulation factor XIII A chain-like	--	--	--	Transglutaminase family, C-terminal ig like domain;; Transglutaminase-like superfamily	Protein-glutamine gamma-glutamyltransferase 2 OS=Pagrus major OX=143350 GN=tgl2 PE=1 SV=1	O	Posttranslational modification, protein turnover, chaperones	coagulation factor XIII A chain-like [Oncorhynchus mykiss]
gene29349	[T]	Signal transduction mechanisms	Molecular Function: protein serine/threonine kinase activity (GO:0004674);; Molecular Function: ATP binding (GO:0005524);; Biological Process: protein phosphorylation (GO:0006468);;	K00907|0|tru:101061699|K00907 myosin-light-chain kinase [EC:2.7.11.18] | (RefSeq) myosin light chain kinase, smooth muscle-like	Calcium signaling pathway (ko04020);; Vascular smooth muscle contraction (ko04270);; Focal adhesion (ko04510);; Regulation of actin cytoskeleton (ko04810)	[Z]	Cytoskeleton	Protein kinase domain;; Protein tyrosine kinase;; Immunoglobulin I-set domain;; Immunoglobulin domain;; Immunoglobulin domain;; Immunoglobulin domain;; Fibronectin type III domain;; Immunoglobulin V-set domain	Myosin light chain kinase, smooth muscle OS=Gallus gallus OX=9031 GN=Mylk PE=1 SV=2	T	Signal transduction mechanisms	myosin light chain kinase, smooth muscle-like [Oncorhynchus mykiss]
gene4341	[MU]	Cell wall/membrane/envelope biogenesis;; Intracellular trafficking, secretion, and vesicular transport	--	K06238|0|cmk:103181583|K06238 collagen, type VI, alpha | (RefSeq) collagen alpha-2(VI) chain-like	Focal adhesion (ko04510);; ECM-receptor interaction (ko04512)	[W]	Extracellular structures	von Willebrand factor type A domain;; Collagen triple helix repeat (20 copies);; von Willebrand factor type A domain	Collagen alpha-2(VI) chain OS=Gallus gallus OX=9031 GN=COL6A2 PE=2 SV=1	S	Function unknown	collagen alpha-2(VI) chain-like [Oncorhynchus kisutch]
gene23658	--	--	Cellular Component: intracellular (GO:0005622);; Biological Process: intracellular protein transport (GO:0006886);;	--	--	[U]	Intracellular trafficking, secretion, and vesicular transport	VHS domain;; GAT domain	Target of Myb protein 1 OS=Gallus gallus OX=9031 GN=TOM1 PE=2 SV=2	S	Function unknown	target of Myb protein 1-like isoform X1 [Oncorhynchus mykiss]
gene4943	[T]	Signal transduction mechanisms	Biological Process: regulation of smoothened signaling pathway (GO:0008589);; Molecular Function: metal ion binding (GO:0046872);;	--	--	[R]	General function prediction only	Ankyrin repeats (3 copies);; Ankyrin repeats (many copies);; Ankyrin repeat;; Ankyrin repeats (many copies);; Ankyrin repeat;; MYND finger	Ankyrin repeat and MYND domain-containing protein 2 OS=Gallus gallus OX=9031 GN=ANKMY2 PE=2 SV=1	S	Function unknown	ankyrin repeat and MYND domain-containing protein 2-like [Oncorhynchus mykiss]
gene40339	[G]	Carbohydrate transport and metabolism	Molecular Function: transporter activity (GO:0005215);; Biological Process: sodium ion transport (GO:0006814);; Cellular Component: integral component of membrane (GO:0016021);; Biological Process: transmembrane transport (GO:0055085);;	K14445|1.83102e-170|tru:101063370|K14445 solute carrier family 13 (sodium-dependent dicarboxylate transporter), member 2/3/5 | (RefSeq) solute carrier family 13 member 2-like	--	[P]	Inorganic ion transport and metabolism	Sodium:sulfate symporter transmembrane region;; Citrate transporter;; Sodium:sulfate symporter transmembrane region	--	P	Inorganic ion transport and metabolism	unnamed protein product [Oncorhynchus mykiss]
gene34185	--	--	Molecular Function: DNA binding (GO:0003677);; Cellular Component: nucleus (GO:0005634);; Biological Process: regulation of transcription, DNA-templated (GO:0006355);; Molecular Function: protein dimerization activity (GO:0046983);;	K09091|1.68138e-93|ola:100049375|K09091 hairy and enhancer of split related with YRPW motif | (RefSeq) hey1; hes related family bHLH transcription factor with YRPW motif 1	--	[K]	Transcription	Helix-loop-helix DNA-binding domain;; Hairy Orange	Hairy/enhancer-of-split related with YRPW motif protein 1 OS=Danio rerio OX=7955 GN=hey1 PE=2 SV=1	K	Transcription	hairy/enhancer-of-split related with YRPW motif protein 1-like [Oncorhynchus mykiss]
gene32841	--	--	Molecular Function: growth factor activity (GO:0008083);; Cellular Component: membrane (GO:0016020);;	K05449|5.50228e-58|dre:678512|K05449 vascular endothelial growth factor C/D | (RefSeq) figf, vegf-d, vegfd; c-fos induced growth factor	Cytokine-cytokine receptor interaction (ko04060);; Focal adhesion (ko04510);; AGE-RAGE signaling pathway in diabetic complications (ko04933)	--	--	PDGF/VEGF domain	Snake venom vascular endothelial growth factor toxin barietin OS=Bitis arietans OX=8692 PE=1 SV=1	A	RNA processing and modification	vascular endothelial growth factor D-like [Oncorhynchus mykiss]
Oncorhynchus_mykiss_newGene_45812	--	--	Cellular Component: integral component of membrane (GO:0016021);;	K06510|7.77118e-16|xma:102220790|K06510 CD83 antigen | (RefSeq) cd83; CD83 molecule	--	--	--	--	--	S	Function unknown	unnamed protein product [Oncorhynchus mykiss]
gene18968	--	--	Molecular Function: nucleic acid binding (GO:0003676);; Molecular Function: metal ion binding (GO:0046872);;	K09230|1.46726e-24|mcf:102146276|K09230 SCAN domain-containing zinc finger protein | (RefSeq) ZSCAN5B; zinc finger and SCAN domain-containing protein 5B	--	[R]	General function prediction only	Zinc-finger double domain;; Zinc finger, C2H2 type;; C2H2-type zinc finger	Gastrula zinc finger protein XlCGF8.2DB (Fragment) OS=Xenopus laevis OX=8355 PE=3 SV=1	S	Function unknown	zinc finger and SCAN domain-containing protein 5B-like isoform X1 [Oncorhynchus mykiss]
Oncorhynchus_mykiss_newGene_5426	--	--	Molecular Function: magnesium ion binding (GO:0000287);; Molecular Function: ADP-ribosylarginine hydrolase activity (GO:0003875);; Biological Process: protein de-ADP-ribosylation (GO:0051725);;	--	--	--	--	--	[Protein ADP-ribosylarginine] hydrolase-like protein 1 OS=Danio rerio OX=7955 GN=adprhl1 PE=2 SV=1	O	Posttranslational modification, protein turnover, chaperones	PREDICTED: protein ADP-ribosylarginine hydrolase-like protein 1 [Salmo salar]
gene30946	--	--	--	K04344|8.34076e-49|ola:101170392|K04344 voltage-dependent calcium channel P/Q type alpha-1A | (RefSeq) cacna1a; calcium voltage-gated channel subunit alpha1 A	MAPK signaling pathway (ko04010);; Calcium signaling pathway (ko04020)	[PT]	Inorganic ion transport and metabolism;; Signal transduction mechanisms	--	--	U	Intracellular trafficking, secretion, and vesicular transport	voltage-dependent P/Q-type calcium channel subunit alpha-1A-like [Oncorhynchus mykiss]
gene9007	--	--	Molecular Function: cation channel activity (GO:0005261);; Biological Process: monovalent inorganic cation transport (GO:0015672);; Cellular Component: integral component of membrane (GO:0016021);; Biological Process: cation transmembrane transport (GO:0098655);;	--	--	[S]	Function unknown	TRIC channel	Trimeric intracellular cation channel type A OS=Danio rerio OX=7955 GN=tmem38a PE=2 SV=1	U	Intracellular trafficking, secretion, and vesicular transport	trimeric intracellular cation channel type A-like [Oncorhynchus mykiss]
gene54513	[R]	General function prediction only	--	K09228|2.733e-111|lcm:102366341|K09228 KRAB domain-containing zinc finger protein | (RefSeq) zinc finger protein 850-like	--	[R]	General function prediction only	Zinc-finger double domain;; Zinc finger, C2H2 type;; C2H2-type zinc finger;; C2H2-type zinc finger;; C2HE / C2H2 / C2HC zinc-binding finger;; Zinc ribbon domain;; zinc-finger C2H2-type;; Phorbol esters/diacylglycerol binding domain (C1 domain);; Zinc-finger of C2H2 type;; Double zinc ribbon;; Zinc-finger double-stranded RNA-binding;; AN1-like Zinc finger;; LYAR-type C2HC zinc finger	Gastrula zinc finger protein XlCGF57.1 (Fragment) OS=Xenopus laevis OX=8355 PE=3 SV=1	S	Function unknown	zinc finger protein 239-like, partial [Oncorhynchus mykiss]
Oncorhynchus_mykiss_newGene_30301	--	--	Cellular Component: membrane (GO:0016020);;	K12662|3.87175e-20|dre:326944|K12662 U4/U6 small nuclear ribonucleoprotein PRP4 | (RefSeq) prpf4, mg:ab03a02, zgc:65943; PRP4 pre-mRNA processing factor 4 homolog (yeast)	Spliceosome (ko03040)	[A]	RNA processing and modification	--	--	S	Function unknown	unnamed protein product [Oncorhynchus mykiss]
Oncorhynchus_mykiss_newGene_32121	--	--	Biological Process: metabolic process (GO:0008152);; Molecular Function: oxidoreductase activity (GO:0016491);; Molecular Function: transferase activity (GO:0016740);;	K19477|7.18554e-61|ola:105356401|K19477 cGMP-dependent protein kinase 2 [EC:2.7.11.12] | (RefSeq) uncharacterized LOC105356401	Gap junction (ko04540)	[R]	General function prediction only	Reverse transcriptase (RNA-dependent DNA polymerase)	--	S	Function unknown	unnamed protein product [Oncorhynchus mykiss]
Oncorhynchus_mykiss_newGene_15673	--	--	--	K13718|1.44866e-06|pbi:103052045|K13718 OTU domain-containing protein 4 [EC:3.4.19.12] | (RefSeq) OTUD4; OTU deubiquitinase 4	--	--	--	--	--	O	Posttranslational modification, protein turnover, chaperones	OTU domain-containing protein 4-like, partial [Oncorhynchus kisutch]
gene7035	--	--	--	--	--	--	--	RD3 protein	--	S	Function unknown	protein RD3-like [Oncorhynchus mykiss]
gene51266	--	--	--	--	--	--	--	PTRF/SDPR family	Caveolae-associated protein 4 OS=Xenopus laevis OX=8355 GN=cavin4 PE=2 SV=1	S	Function unknown	serum deprivation-response protein-like, partial [Oncorhynchus mykiss]
Oncorhynchus_mykiss_newGene_13452	--	--	Biological Process: heart morphogenesis (GO:0003007);;	--	--	--	--	--	Cerebral cavernous malformations protein 2 homolog OS=Danio rerio OX=7955 GN=ccm2 PE=1 SV=1	S	Function unknown	PREDICTED: cerebral cavernous malformations 2 protein-like isoform X1 [Salmo salar]
gene11856	--	--	--	--	--	[D]	Cell cycle control, cell division, chromosome partitioning	PCI domain	PCI domain-containing protein 2 OS=Danio rerio OX=7955 GN=pcid2 PE=2 SV=1	L	Replication, recombination and repair	PCI domain-containing protein 2-like [Oncorhynchus mykiss]
gene4814	--	--	Cellular Component: integral component of membrane (GO:0016021);;	--	--	[O]	Posttranslational modification, protein turnover, chaperones	Ubiquitin family	Homocysteine-responsive endoplasmic reticulum-resident ubiquitin-like domain member 2 protein OS=Danio rerio OX=7955 GN=herpud2 PE=2 SV=1	O	Posttranslational modification, protein turnover, chaperones	homocysteine-responsive endoplasmic reticulum-resident ubiquitin-like domain member 2 protein [Oncorhynchus mykiss]
gene45012	[T]	Signal transduction mechanisms	--	--	--	[O]	Posttranslational modification, protein turnover, chaperones	Ankyrin repeats (many copies);; Ankyrin repeats (3 copies);; Ankyrin repeat;; Ankyrin repeat;; Ankyrin repeats (many copies)	Serine/threonine-protein phosphatase 6 regulatory ankyrin repeat subunit B OS=Gallus gallus OX=9031 GN=ANKRD44 PE=2 SV=1	O	Posttranslational modification, protein turnover, chaperones	ankyrin repeat domain-containing protein 45 [Oncorhynchus kisutch]
gene6697	--	--	Cellular Component: integral component of membrane (GO:0016021);;	--	--	--	--	Protein-kinase domain of FAM69;; N-term cysteine-rich ER, FAM69	Protein FAM69A OS=Danio rerio OX=7955 GN=fam69a PE=2 SV=1	S	Function unknown	protein FAM69A-like [Oncorhynchus mykiss]
gene3839	--	--	--	--	--	--	--	--	--	S	Function unknown	ataxin-1-like [Oncorhynchus mykiss]
gene22186	[M]	Cell wall/membrane/envelope biogenesis	Cellular Component: integral component of membrane (GO:0016021);;	K09655|4.93652e-58|mze:101475242|K09655 beta-1,4-N-acetylgalactosaminyltransferase 2 [EC:2.4.1.-] | (RefSeq) beta-1,4 N-acetylgalactosaminyltransferase 2-like	--	--	--	Glycosyl transferase family 2	--	O	Posttranslational modification, protein turnover, chaperones	beta-1,4 N-acetylgalactosaminyltransferase 2-like [Oncorhynchus mykiss]
gene1225	--	--	--	--	--	--	--	'Cold-shock' DNA-binding domain	--	S	Function unknown	uncharacterized protein LOC110527465 isoform X1 [Oncorhynchus mykiss]
gene17016	[F]	Nucleotide transport and metabolism	Molecular Function: adenosine deaminase activity (GO:0004000);; Cellular Component: cytosol (GO:0005829);; Biological Process: adenosine catabolic process (GO:0006154);; Biological Process: purine ribonucleoside monophosphate biosynthetic process (GO:0009168);; Cellular Component: external side of plasma membrane (GO:0009897);; Biological Process: T cell activation (GO:0042110);; Biological Proce…	K01488|0|tru:101067590|K01488 adenosine deaminase [EC:3.5.4.4] | (RefSeq) ada; adenosine deaminase	Purine metabolism (ko00230)	[F]	Nucleotide transport and metabolism	Adenosine/AMP deaminase	Adenosine deaminase OS=Danio rerio OX=7955 GN=ada PE=2 SV=2	F	Nucleotide transport and metabolism	adenosine deaminase [Salvelinus alpinus]
gene31340	[R]	General function prediction only	Biological Process: autophagosome assembly (GO:0000045);; Cellular Component: Golgi membrane (GO:0000139);; Molecular Function: GTPase activity (GO:0003924);; Molecular Function: GTP binding (GO:0005525);; Cellular Component: endoplasmic reticulum membrane (GO:0005789);; Biological Process: endocytosis (GO:0006897);; Biological Process: Golgi organization (GO:0007030);; Biological Process: small …	K07874|2.22437e-138|cmk:103177922|K07874 Ras-related protein Rab-1A | (RefSeq) rab1a; RAB1A, member RAS oncogene family	--	[TU]	Signal transduction mechanisms;; Intracellular trafficking, secretion, and vesicular transport	Ras family;; Ras of Complex, Roc, domain of DAPkinase;; ADP-ribosylation factor family;; 50S ribosome-binding GTPase;; Gtr1/RagA G protein conserved region;; Signal recognition particle receptor beta subunit	Ras-related protein ORAB-1 OS=Diplobatis ommata OX=1870830 PE=2 SV=1	S	Function unknown	ras-related protein ORAB-1-like [Oncorhynchus kisutch]
Oncorhynchus_mykiss_newGene_63013	--	--	--	--	--	--	--	--	--	--	--	unnamed protein product [Oncorhynchus mykiss]
gene31702	--	--	Molecular Function: zinc ion binding (GO:0008270);;	--	--	[T]	Signal transduction mechanisms	LIM domain	Zyxin OS=Gallus gallus OX=9031 GN=ZYX PE=1 SV=1	S	Function unknown	filamin-binding LIM protein 1-like [Oncorhynchus mykiss]
gene32447	--	--	Cellular Component: integral component of membrane (GO:0016021);; Biological Process: transmembrane transport (GO:0055085);;	K15107|0|ola:101171405|K15107 solute carrier family 25 (mitochondrial glutamate transporter), member 18/22 | (RefSeq) mitochondrial glutamate carrier 1-like	--	[C]	Energy production and conversion	Mitochondrial carrier protein	Solute carrier family 25 member 48 OS=Danio rerio OX=7955 GN=slc25a48 PE=2 SV=1	S	Function unknown	mitochondrial glutamate carrier 1-like [Oncorhynchus mykiss]
Oncorhynchus_mykiss_newGene_47192	--	--	Molecular Function: DNA binding (GO:0003677);; Biological Process: transposition, DNA-mediated (GO:0006313);; Biological Process: DNA integration (GO:0015074);;	--	--	--	--	Transposase;; DDE superfamily endonuclease	--	S	Function unknown	unnamed protein product, partial [Oncorhynchus mykiss]
gene39220	--	--	--	K08462|0|mze:101470133|K08462 G protein-coupled receptor 125 | (RefSeq) adgra1; adhesion G protein-coupled receptor A1	--	[R]	General function prediction only	7 transmembrane receptor (Secretin family);; GPCR proteolysis site, GPS, motif;; Hormone receptor domain;; Leucine rich repeat;; Leucine Rich repeats (2 copies);; Leucine Rich Repeat	Adhesion G protein-coupled receptor A2 OS=Danio rerio OX=7955 GN=adgra2 PE=1 SV=2	S	Function unknown	adhesion G protein-coupled receptor A3-like [Oncorhynchus mykiss]
gene19485	[UW]	Intracellular trafficking, secretion, and vesicular transport;; Extracellular structures	--	K19721|0|xma:102219650|K19721 collagen, type V/XI/XXIV/XXVII, alpha | (RefSeq) collagen alpha-1(XI) chain-like	--	[W]	Extracellular structures	Collagen triple helix repeat (20 copies);; Fibrillar collagen C-terminal domain;; Laminin G domain	Collagen alpha-1(II) chain OS=Xenopus tropicalis OX=8364 GN=col2a1 PE=2 SV=1	S	Function unknown	collagen alpha-1(XI) chain [Oncorhynchus mykiss]
gene11271	--	--	Molecular Function: calcium ion binding (GO:0005509);;	--	--	[T]	Signal transduction mechanisms	EF hand;; EF-hand domain;; EF-hand domain pair;; EF hand;; EF-hand domain pair;; Voltage-dependent L-type calcium channel, IQ-associated	Calretinin OS=Gallus gallus OX=9031 GN=CALB2 PE=2 SV=3	DTZ	Cell cycle control, cell division, chromosome partitioning;; Signal transduction mechanisms;; Cytoskeleton	calretinin-like isoform X1 [Oncorhynchus mykiss]
gene13827	--	--	Molecular Function: serine-type endopeptidase inhibitor activity (GO:0004867);; Biological Process: negative regulation of endopeptidase activity (GO:0010951);;	--	--	[O]	Posttranslational modification, protein turnover, chaperones	Kunitz/Bovine pancreatic trypsin inhibitor domain;; Thrombospondin type 1 domain	Kunitz-type serine protease inhibitor bitisilin-3 (Fragment) OS=Bitis gabonica OX=8694 PE=2 SV=1	S	Function unknown	papilin-like [Oncorhynchus mykiss]
gene29016	--	--	Molecular Function: GTPase activator activity (GO:0005096);; Biological Process: positive regulation of GTPase activity (GO:0043547);;	--	--	[T]	Signal transduction mechanisms	Putative GTPase activating protein for Arf;; PH domain;; Pleckstrin homology domain	Arf-GAP with coiled-coil, ANK repeat and PH domain-containing protein 2 OS=Gallus gallus OX=9031 GN=ACAP2 PE=2 SV=1	U	Intracellular trafficking, secretion, and vesicular transport	PREDICTED: arf-GAP with dual PH domain-containing protein 1-like isoform X2 [Salmo salar]
gene5702	[X]	--	Cellular Component: integral component of plasma membrane (GO:0005887);; Molecular Function: glycine binding (GO:0016594);; Molecular Function: transmitter-gated ion channel activity (GO:0022824);; Cellular Component: cell junction (GO:0030054);; Biological Process: ion transmembrane transport (GO:0034220);; Cellular Component: postsynapse (GO:0098794);; Biological Process: chemical synaptic tran…	K05194|0|mze:101487958|K05194 glycine receptor alpha-2 | (RefSeq) glra2; glycine receptor alpha 2	Neuroactive ligand-receptor interaction (ko04080)	[T]	Signal transduction mechanisms	Neurotransmitter-gated ion-channel ligand binding domain;; Neurotransmitter-gated ion-channel transmembrane region	Glycine receptor subunit alphaZ1 OS=Danio rerio OX=7955 GN=glra1 PE=1 SV=1	U	Intracellular trafficking, secretion, and vesicular transport	glycine receptor subunit alpha-2-like [Oncorhynchus mykiss]
gene12128	[M]	Cell wall/membrane/envelope biogenesis	Molecular Function: transferase activity, transferring glycosyl groups (GO:0016757);;	K00750|1.42161e-89|ola:101169002|K00750 glycogenin [EC:2.4.1.186] | (RefSeq) glycogenin-1-like	--	[G]	Carbohydrate transport and metabolism	Glycosyl transferase family 8	--	O	Posttranslational modification, protein turnover, chaperones	PREDICTED: glycogenin-1-like isoform X1 [Salmo salar]
gene11263	--	--	Molecular Function: G-protein coupled receptor activity (GO:0004930);; Biological Process: G-protein coupled receptor signaling pathway (GO:0007186);; Cellular Component: integral component of membrane (GO:0016021);;	K08451|1.30482e-38|amj:102574286|K08451 G protein-coupled receptor 64 | (RefSeq) ADGRG2, GPR64; adhesion G protein-coupled receptor G2	--	[T]	Signal transduction mechanisms	7 transmembrane receptor (Secretin family);; 7 transmembrane receptor (Secretin family)	Adhesion G-protein coupled receptor G6 OS=Danio rerio OX=7955 GN=adgrg6 PE=1 SV=1	S	Function unknown	adhesion G protein-coupled receptor G3-like [Oncorhynchus kisutch]
gene54722	--	--	--	--	--	--	--	--	--	S	Function unknown	unnamed protein product [Oncorhynchus mykiss]
gene41084	--	--	--	K07363|0|mze:101468250|K07363 IL2-inducible T-cell kinase [EC:2.7.10.2] | (RefSeq) itk; IL2 inducible T-cell kinase	--	[T]	Signal transduction mechanisms	Protein tyrosine kinase;; SH2 domain;; BTK motif;; Protein kinase domain;; PH domain;; SH3 domain;; Variant SH3 domain	Tyrosine-protein kinase BTK OS=Gallus gallus OX=9031 GN=BTK PE=1 SV=1	T	Signal transduction mechanisms	tyrosine-protein kinase ITK/TSK-like [Oncorhynchus mykiss]
gene29386	[G]	Carbohydrate transport and metabolism	Molecular Function: calcium ion binding (GO:0005509);; Cellular Component: integral component of membrane (GO:0016021);;	K06233|0|xma:102224021|K06233 low density lipoprotein-related protein 2 | (RefSeq) low-density lipoprotein receptor-related protein 2-like	Hedgehog signaling pathway (ko04340)	[T]	Signal transduction mechanisms	Low-density lipoprotein receptor domain class A;; Low-density lipoprotein receptor repeat class B;; Coagulation Factor Xa inhibitory site;; Calcium-binding EGF domain;; Complement Clr-like EGF-like;; Domain of unknown function (DUF5050);; SMP-30/Gluconolaconase/LRE-like region;; Arylesterase	Low-density lipoprotein receptor-related protein 1 OS=Gallus gallus OX=9031 GN=LRP1 PE=2 SV=1	S	Function unknown	low-density lipoprotein receptor-related protein 2-like [Oncorhynchus mykiss]
gene6732	--	--	Molecular Function: transcription factor activity, sequence-specific DNA binding (GO:0003700);; Biological Process: regulation of transcription, DNA-templated (GO:0006355);; Cellular Component: integral component of membrane (GO:0016021);; Molecular Function: sequence-specific DNA binding (GO:0043565);;	K09399|3.45949e-162|mze:101471063|K09399 forkhead box protein F | (RefSeq) foxf2; forkhead box F2	--	[K]	Transcription	Forkhead domain	Forkhead box protein F1 OS=Xenopus tropicalis OX=8364 GN=foxf1 PE=2 SV=1	K	Transcription	forkhead box protein F2-like [Oncorhynchus mykiss]
Oncorhynchus_mykiss_newGene_61826	--	--	--	--	--	--	--	--	--	--	--	uncharacterized protein LOC111959710 [Salvelinus alpinus]
gene8854	--	--	Molecular Function: zinc ion binding (GO:0008270);; Cellular Component: integral component of membrane (GO:0016021);; Molecular Function: ligase activity (GO:0016874);;	K15692|0|tru:101069553|K15692 E3 ubiquitin-protein ligase RNF13 [EC:2.3.2.27] | (RefSeq) rnf13; ring finger protein 13	--	[O]	Posttranslational modification, protein turnover, chaperones	Ring finger domain;; RING-like zinc finger;; PA domain;; Zinc finger, C3HC4 type (RING finger);; Zinc finger, C3HC4 type (RING finger);; zinc-RING finger domain;; RING-type zinc-finger	E3 ubiquitin-protein ligase RNF13 OS=Gallus gallus OX=9031 GN=RNF13 PE=1 SV=1	O	Posttranslational modification, protein turnover, chaperones	E3 ubiquitin-protein ligase RNF13 isoform X1 [Oncorhynchus mykiss]
Oncorhynchus_mykiss_newGene_24586	--	--	Cellular Component: ruffle (GO:0001726);; Molecular Function: receptor binding (GO:0005102);; Molecular Function: structural constituent of cytoskeleton (GO:0005200);; Molecular Function: inorganic anion exchanger activity (GO:0005452);; Molecular Function: calcium ion binding (GO:0005509);; Cellular Component: nucleus (GO:0005634);; Cellular Component: focal adhesion (GO:0005925);; Biological Pr…	--	--	--	--	--	--	--	--	unnamed protein product, partial [Oncorhynchus mykiss]
gene28742	--	--	Biological Process: regulation of transcription, DNA-templated (GO:0006355);;	K19195|8.39575e-35|mze:101478607|K19195 AT-rich interactive domain-containing protein 4B | (RefSeq) arid4b; AT-rich interaction domain 4B	--	[BK]	Chromatin structure and dynamics;; Transcription	RNA binding activity-knot of a chromodomain	--	S	Function unknown	AT-rich interactive domain-containing protein 4B-like [Oncorhynchus mykiss]
gene42635	[J]	Translation, ribosomal structure and biogenesis	Cellular Component: integral component of membrane (GO:0016021);; Molecular Function: tRNA (adenine-N1-)-methyltransferase activity (GO:0016429);; Biological Process: tRNA methylation (GO:0030488);; Cellular Component: tRNA (m1A) methyltransferase complex (GO:0031515);;	K07442|1.63551e-175|mze:101472853|K07442 tRNA (adenine57-N1/adenine58-N1)-methyltransferase catalytic subunit [EC:2.1.1.219 2.1.1.220] | (RefSeq) trmt61b; tRNA methyltransferase 61B	--	[J]	Translation, ribosomal structure and biogenesis	tRNA methyltransferase complex GCD14 subunit;; Protein-L-isoaspartate(D-aspartate) O-methyltransferase (PCMT)	--	J	Translation, ribosomal structure and biogenesis	tRNA (adenine(58)-N(1))-methyltransferase, mitochondrial [Oncorhynchus mykiss]
gene422	[F]	Nucleotide transport and metabolism	Biological Process: sprouting angiogenesis (GO:0002040);; Cellular Component: mitochondrion (GO:0005739);; Biological Process: regulation of cholesterol efflux (GO:0010874);; Cellular Component: membrane (GO:0016020);; Biological Process: negative regulation of angiogenesis (GO:0016525);; Biological Process: membrane raft distribution (GO:0031580);; Molecular Function: NADHX epimerase activity (G…	--	--	[S]	Function unknown	YjeF-related protein N-terminus	NAD(P)H-hydrate epimerase OS=Xenopus tropicalis OX=8364 GN=naxe PE=3 SV=1	G	Carbohydrate transport and metabolism	yjeF N-terminal domain-containing protein 3-like [Oncorhynchus mykiss]
gene31215	--	--	Molecular Function: structural molecule activity (GO:0005198);; Cellular Component: intermediate filament (GO:0005882);;	K07604|2.02401e-29|tru:101076594|K07604 type I keratin, acidic | (RefSeq) keratin, type I cytoskeletal 13-like	--	--	--	--	Keratin, type I cytoskeletal 18 OS=Carassius auratus OX=7957 GN=krt18 PE=2 SV=1	B	Chromatin structure and dynamics	keratin, type I cytoskeletal 50 kDa-like [Oncorhynchus kisutch]
Oncorhynchus_mykiss_newGene_65844	--	--	--	K20645|6.03086e-09|gga:101749378|K20645 Rho GTPase-activating protein 30 | (RefSeq) ARHGAP30; Rho GTPase activating protein 30	--	--	--	--	--	S	Function unknown	PREDICTED: extensin-1-like isoform X1 [Salmo salar]
gene32064	--	--	--	--	--	[S]	Function unknown	Domain of unknown function (DUF3402);; N1221-like protein	Striatin-interacting protein 1 homolog OS=Danio rerio OX=7955 GN=strip1 PE=1 SV=1	S	Function unknown	striatin-interacting protein 1 homolog [Oncorhynchus mykiss]
gene45743	[I]	Lipid transport and metabolism	Molecular Function: acyl-CoA dehydrogenase activity (GO:0003995);; Molecular Function: flavin adenine dinucleotide binding (GO:0050660);; Biological Process: oxidation-reduction process (GO:0055114);;	K00248|0|xma:102223580|K00248 butyryl-CoA dehydrogenase [EC:1.3.8.1] | (RefSeq) acads; acyl-CoA dehydrogenase, C-2 to C-3 short chain	Fatty acid degradation (ko00071);; Valine, leucine and isoleucine degradation (ko00280);; Butanoate metabolism (ko00650);; Carbon metabolism (ko01200);; Fatty acid metabolism (ko01212)	[I]	Lipid transport and metabolism	Acyl-CoA dehydrogenase, C-terminal domain;; Acyl-CoA dehydrogenase, N-terminal domain;; Acyl-CoA dehydrogenase, middle domain;; Acyl-CoA dehydrogenase, C-terminal domain	Acyl-CoA dehydrogenase family member 11 OS=Gallus gallus OX=9031 GN=ACAD11 PE=2 SV=1	I	Lipid transport and metabolism	short-chain specific acyl-CoA dehydrogenase, mitochondrial-like isoform X1 [Oncorhynchus mykiss]
gene36675	--	--	--	K18466|0|dre:393881|K18466 vacuolar protein sorting-associated protein 26 | (RefSeq) vps26a, vps26, wu:fc67e06, zgc:56673; vacuolar protein sorting 26 homolog A (S. pombe)	Endocytosis (ko04144)	[U]	Intracellular trafficking, secretion, and vesicular transport	Vacuolar protein sorting-associated protein 26	Vacuolar protein sorting-associated protein 26A OS=Danio rerio OX=7955 GN=vps26a PE=2 SV=1	U	Intracellular trafficking, secretion, and vesicular transport	unnamed protein product [Oncorhynchus mykiss]
gene51221	--	--	Molecular Function: guanyl-nucleotide exchange factor activity (GO:0005085);; Cellular Component: intracellular (GO:0005622);; Biological Process: small GTPase mediated signal transduction (GO:0007264);; Biological Process: positive regulation of GTPase activity (GO:0043547);;	K17635|6.55682e-35|mze:101481095|K17635 ral guanine nucleotide dissociation stimulator-like 1 | (RefSeq) ral guanine nucleotide dissociation stimulator-like 1	--	[T]	Signal transduction mechanisms	Ras association (RalGDS/AF-6) domain	Ral guanine nucleotide dissociation stimulator-like 1 OS=Danio rerio OX=7955 GN=rgl1 PE=2 SV=1	S	Function unknown	ral guanine nucleotide dissociation stimulator-like 1 [Oncorhynchus mykiss]
gene44964	[P]	Inorganic ion transport and metabolism	Molecular Function: carbonate dehydratase activity (GO:0004089);; Biological Process: one-carbon metabolic process (GO:0006730);; Molecular Function: zinc ion binding (GO:0008270);; Biological Process: carbon dioxide transport (GO:0015670);; Biological Process: hypotonic salinity response (GO:0042539);;	K18245|6.64062e-143|xma:102230409|K18245 carbonic anhydrase 2 [EC:4.2.1.1] | (RefSeq) carbonic anhydrase-like	Nitrogen metabolism (ko00910)	[R]	General function prediction only	Eukaryotic-type carbonic anhydrase	Carbonic anhydrase OS=Danio rerio OX=7955 GN=cahz PE=1 SV=2	P	Inorganic ion transport and metabolism	carbonic anhydrase-like [Oncorhynchus mykiss]
gene46116	--	--	Molecular Function: protein serine/threonine phosphatase inhibitor activity (GO:0004865);; Cellular Component: cytoplasm (GO:0005737);; Biological Process: regulation of protein dephosphorylation (GO:0035304);; Biological Process: regulation of phosphorylation (GO:0042325);; Biological Process: innate immune response (GO:0045087);;	--	--	--	--	PKC-activated protein phosphatase-1 inhibitor	--	--	--	protein phosphatase 1 regulatory subunit 14B-like isoform X1 [Oncorhynchus mykiss]
gene14536	[O]	Posttranslational modification, protein turnover, chaperones	--	K08955|0|mze:101469523|K08955 ATP-dependent metalloprotease [EC:3.4.24.-] | (RefSeq) ATP-dependent zinc metalloprotease YME1L1-like	--	[O]	Posttranslational modification, protein turnover, chaperones	Peptidase family M41;; ATPase family associated with various cellular activities (AAA)	26S proteasome regulatory subunit 7 OS=Xenopus laevis OX=8355 GN=psmc2 PE=2 SV=1	O	Posttranslational modification, protein turnover, chaperones	ATP-dependent zinc metalloprotease YME1L1-like isoform X1 [Oncorhynchus mykiss]
gene35879	--	--	Cellular Component: Golgi membrane (GO:0000139);; Biological Process: response to hypoxia (GO:0001666);; Biological Process: lymphangiogenesis (GO:0001946);; Molecular Function: aspartic-type endopeptidase activity (GO:0004190);; Cellular Component: endoplasmic reticulum membrane (GO:0005789);; Biological Process: Notch signaling pathway (GO:0007219);; Biological Process: brain development (GO:00…	K04505|3.10003e-88|mze:101485940|K04505 presenilin 1 [EC:3.4.23.-] | (RefSeq) psen1; presenilin-1	Wnt signaling pathway (ko04310);; Notch signaling pathway (ko04330)	[T]	Signal transduction mechanisms	Presenilin	Presenilin-1 OS=Gallus gallus OX=9031 GN=PSEN1 PE=1 SV=1	U	Intracellular trafficking, secretion, and vesicular transport	unnamed protein product, partial [Oncorhynchus mykiss]
gene43579	--	--	--	--	--	--	--	--	Coiled-coil domain-containing protein 153 OS=Danio rerio OX=7955 GN=ccdc153 PE=2 SV=1	S	Function unknown	coiled-coil domain-containing protein 153 [Oncorhynchus mykiss]
gene35020	--	--	Biological Process: autophagy of mitochondrion (GO:0000422);; Cellular Component: mitochondrial outer membrane (GO:0005741);; Cellular Component: endoplasmic reticulum membrane (GO:0005789);; Biological Process: multicellular organism aging (GO:0010259);; Biological Process: regulation of autophagy (GO:0010506);; Cellular Component: integral component of membrane (GO:0016021);; Molecular Function…	--	--	[R]	General function prediction only	Iron-containing outer mitochondrial membrane protein N-terminus;; Iron-binding zinc finger CDGSH type	CDGSH iron-sulfur domain-containing protein 2B OS=Oncorhynchus mykiss OX=8022 GN=cisd2b PE=2 SV=1	S	Function unknown	CDGSH iron-sulfur domain-containing protein 2B [Oncorhynchus kisutch]
gene8341	--	--	Biological Process: neuropeptide signaling pathway (GO:0007218);; Biological Process: chemical synaptic transmission (GO:0007268);; Molecular Function: melanin-concentrating hormone activity (GO:0030354);;	K05229|2.41454e-30|mze:101482942|K05229 pro-melanin-concentrating hormone | (RefSeq) pro-MCH	--	--	--	Pro-melanin-concentrating hormone (Pro-MCH)	Pro-MCH 1 OS=Oncorhynchus mykiss OX=8022 GN=mch1 PE=2 SV=1	S	Function unknown	pro-MCH 1 [Oncorhynchus mykiss]
gene21813	--	--	--	K07870|0|mze:101469002|K07870 Ras homolog gene family, member T1 | (RefSeq) mitochondrial Rho GTPase 1-A	--	[V]	Defense mechanisms	EF hand associated;; EF hand associated;; Ras family;; Ras of Complex, Roc, domain of DAPkinase;; Signal recognition particle receptor beta subunit;; ADP-ribosylation factor family;; 50S ribosome-binding GTPase	Mitochondrial Rho GTPase 1-A OS=Danio rerio OX=7955 GN=rhot1a PE=2 SV=1	S	Function unknown	mitochondrial Rho GTPase 1-A [Oncorhynchus mykiss]
gene5316	--	--	Biological Process: amino acid transmembrane transport (GO:0003333);; Cellular Component: endoplasmic reticulum (GO:0005783);; Molecular Function: amino acid transmembrane transporter activity (GO:0015171);; Cellular Component: integral component of membrane (GO:0016021);;	K14997|0|ola:101156050|K14997 solute carrier family 38 (sodium-coupled neutral amino acid transporter), member 11 | (RefSeq) slc38a11; solute carrier family 38 member 11	--	[E]	Amino acid transport and metabolism	Transmembrane amino acid transporter protein;; Tryptophan/tyrosine permease family	Putative sodium-coupled neutral amino acid transporter 11 OS=Danio rerio OX=7955 GN=slc38a11 PE=2 SV=2	E	Amino acid transport and metabolism	putative sodium-coupled neutral amino acid transporter 11 [Oncorhynchus mykiss]
gene5090	[R]	General function prediction only	--	--	--	[R]	General function prediction only	Zinc finger, C2H2 type;; Zinc-finger double domain;; C2H2-type zinc finger;; Zinc-finger double-stranded RNA-binding;; Zinc-finger of C2H2 type	Zinc finger protein Xfin OS=Xenopus laevis OX=8355 PE=1 SV=1	S	Function unknown	zinc finger protein 236 [Oncorhynchus mykiss]
Oncorhynchus_mykiss_newGene_23277	--	--	--	--	--	--	--	CENP-B N-terminal DNA-binding domain	--	--	--	unnamed protein product, partial [Oncorhynchus mykiss]
gene31438	--	--	--	K06115|0|dre:553451|K06115 spectrin beta | (RefSeq) sptbn1; spectrin, beta, non-erythrocytic 1	--	[Z]	Cytoskeleton	Spectrin repeat;; Calponin homology (CH) domain;; Pleckstrin homology domain;; PH domain;; CAMSAP CH domain	Spectrin alpha chain, non-erythrocytic 1 OS=Gallus gallus OX=9031 GN=SPTAN1 PE=1 SV=3	Z	Cytoskeleton	spectrin beta chain, non-erythrocytic 1 [Oncorhynchus mykiss]
gene4260	--	--	Molecular Function: calcium ion binding (GO:0005509);; Biological Process: regulation of cell proliferation (GO:0042127);; Molecular Function: calcium-dependent protein binding (GO:0048306);;	--	--	--	--	S-100/ICaBP type calcium binding domain	Protein S100-A11 OS=Gallus gallus OX=9031 GN=S100A11 PE=1 SV=2	U	Intracellular trafficking, secretion, and vesicular transport	protein S100-A11-like [Oncorhynchus mykiss]
gene35896	--	--	--	K12484|2.86999e-118|xma:102222535|K12484 Rab11 family-interacting protein 1/2/5 | (RefSeq) dentin sialophosphoprotein-like	Endocytosis (ko04144)	--	--	C2 domain	--	S	Function unknown	rab11 family-interacting protein 5-like isoform X1 [Oncorhynchus mykiss]
gene42781	--	--	Cellular Component: endoplasmic reticulum (GO:0005783);; Cellular Component: Golgi apparatus (GO:0005794);; Biological Process: ER to Golgi vesicle-mediated transport (GO:0006888);; Cellular Component: perinuclear region of cytoplasm (GO:0048471);;	K20301|1.63221e-84|mze:101470961|K20301 trafficking protein particle complex subunit 2 | (RefSeq) trappc2l; trafficking protein particle complex 2 like	--	[S]	Function unknown	Sedlin, N-terminal conserved region;; Sybindin-like family	Trafficking protein particle complex subunit 2-like protein OS=Salmo salar OX=8030 GN=trappc2l PE=2 SV=1	U	Intracellular trafficking, secretion, and vesicular transport	trafficking protein particle complex subunit 2-like protein isoform X1 [Oncorhynchus mykiss]
gene55250	[Q]	Secondary metabolites biosynthesis, transport and catabolism	--	--	--	--	--	Phytanoyl-CoA dioxygenase (PhyH)	--	S	Function unknown	uncharacterized protein LOC110519491 [Oncorhynchus mykiss]
gene20070	[M]	Cell wall/membrane/envelope biogenesis	--	K04362|0|mze:101469987|K04362 fibroblast growth factor receptor 1 [EC:2.7.10.1] | (RefSeq) fgfr1a; fibroblast growth factor receptor 1-A	MAPK signaling pathway (ko04010);; Adherens junction (ko04520);; Regulation of actin cytoskeleton (ko04810)	[T]	Signal transduction mechanisms	Protein tyrosine kinase;; Protein kinase domain;; Immunoglobulin I-set domain;; Immunoglobulin domain;; Immunoglobulin domain;; Immunoglobulin domain;; Immunoglobulin V-set domain;; Ig-like domain on T-cell surface glycoprotein CD3 epsilon chain;; Alphaherpesvirus glycoprotein E	Fibroblast growth factor receptor 1-A OS=Danio rerio OX=7955 GN=fgfr1a PE=1 SV=2	T	Signal transduction mechanisms	fibroblast growth factor receptor 1-A-like isoform X1 [Oncorhynchus mykiss]
gene4153	--	--	--	K08802|3.89306e-83|xma:102226318|K08802 SNF related kinase [EC:2.7.11.1] | (RefSeq) snrk; SNF related kinase	--	[T]	Signal transduction mechanisms	Protein kinase domain	--	T	Signal transduction mechanisms	SNF-related serine/threonine-protein kinase-like [Oncorhynchus mykiss]
gene35660	--	--	Cellular Component: trans-Golgi network (GO:0005802);; Biological Process: positive regulation of Golgi to plasma membrane protein transport (GO:0042998);; Molecular Function: connexin binding (GO:0071253);;	K17581|1.88925e-32|ola:105356287|K17581 consortin | (RefSeq) consortin-like	--	--	--	Consortin C-terminus	--	U	Intracellular trafficking, secretion, and vesicular transport	consortin-like [Oncorhynchus mykiss]
gene16052	--	--	Cellular Component: integral component of membrane (GO:0016021);;	--	--	--	--	Immunoglobulin V-set domain;; Immunoglobulin domain;; Immunoglobulin I-set domain;; Immunoglobulin domain	--	S	Function unknown	uncharacterized protein LOC110531682 [Oncorhynchus mykiss]
gene36725	--	--	Molecular Function: 3',5'-cyclic-nucleotide phosphodiesterase activity (GO:0004114);; Biological Process: visual perception (GO:0007601);; Molecular Function: cGMP binding (GO:0030553);;	K13759|4.62603e-52|xma:102221623|K13759 retinal rod rhodopsin-sensitive cGMP 3',5'-cyclic phosphodiesterase subunit gamma | (RefSeq) retinal rod rhodopsin-sensitive cGMP 3',5'-cyclic phosphodiesterase subunit gamma	Purine metabolism (ko00230);; Phototransduction (ko04744)	--	--	Retinal cGMP phosphodiesterase, gamma subunit	--	T	Signal transduction mechanisms	Retinal rod rhodopsin-sensitive cGMP 3,5-cyclic phosphodiesterase subunit gamma [Salmo salar]
gene37169	[E]	Amino acid transport and metabolism	Biological Process: amino acid transmembrane transport (GO:0003333);; Molecular Function: amino acid transmembrane transporter activity (GO:0015171);; Cellular Component: integral component of membrane (GO:0016021);;	--	--	[E]	Amino acid transport and metabolism	Amino acid permease;; Amino acid permease	Y+L amino acid transporter 2 OS=Danio rerio OX=7955 GN=slc7a6 PE=2 SV=1	E	Amino acid transport and metabolism	cystine/glutamate transporter-like isoform X1 [Oncorhynchus mykiss]
gene10890	--	--	--	--	--	--	--	Secretogranin-3	Secretogranin-3 OS=Danio rerio OX=7955 GN=scg3 PE=2 SV=1	U	Intracellular trafficking, secretion, and vesicular transport	secretogranin-3-like, partial [Oncorhynchus mykiss]
gene18737	--	--	Molecular Function: nucleic acid binding (GO:0003676);; Molecular Function: metal ion binding (GO:0046872);;	--	--	[R]	General function prediction only	Zinc finger, C2H2 type	Gastrula zinc finger protein XlCGF71.1 (Fragment) OS=Xenopus laevis OX=8355 PE=3 SV=1	S	Function unknown	uncharacterized protein LOC110534616 isoform X1 [Oncorhynchus mykiss]
gene12458	[C]	Energy production and conversion	Molecular Function: hydrogen ion transmembrane transporter activity (GO:0015078);; Biological Process: ATP synthesis coupled proton transport (GO:0015986);; Biological Process: ATP hydrolysis coupled proton transport (GO:0015991);; Cellular Component: integral component of membrane (GO:0016021);; Cellular Component: proton-transporting ATP synthase complex, coupling factor F(o) (GO:0045263);;	K02128|8.95426e-66|dre:81541|K02128 F-type H+-transporting ATPase subunit c | (RefSeq) atp5g3b, atp5g, atpp3, cb327; ATP synthase, H+ transporting, mitochondrial F0 complex, subunit c3 (subunit 9) b	Oxidative phosphorylation (ko00190)	[C]	Energy production and conversion	ATP synthase subunit C	--	C	Energy production and conversion	ATP synthase F(0) complex subunit C3, mitochondrial-like [Oncorhynchus kisutch]
gene13764	--	--	--	--	--	--	--	--	Vertnin OS=Danio rerio OX=7955 GN=vrtn PE=2 SV=1	S	Function unknown	vertnin-like [Oncorhynchus mykiss]
gene16436	--	--	--	--	--	[S]	Function unknown	Piezo non-specific cation channel, R-Ras-binding domain;; Piezo	--	S	Function unknown	piezo-type mechanosensitive ion channel component 2-like [Oncorhynchus mykiss]
Oncorhynchus_mykiss_newGene_3009	--	--	Molecular Function: transporter activity (GO:0005215);; Molecular Function: ATP binding (GO:0005524);; Biological Process: transport (GO:0006810);; Cellular Component: integral component of membrane (GO:0016021);; Molecular Function: ATPase activity (GO:0016887);;	K05643|3.53984e-12|xma:102229001|K05643 ATP-binding cassette, subfamily A (ABC1), member 3 | (RefSeq) abca3; ATP binding cassette subfamily A member 3	ABC transporters (ko02010)	[IR]	Lipid transport and metabolism;; General function prediction only	--	--	V	Defense mechanisms	ATP-binding cassette sub-family A member 3, partial [Salmo salar]
gene30172	--	--	Cellular Component: integral component of membrane (GO:0016021);;	--	--	--	--	--	--	--	--	uncharacterized protein LOC110492397 isoform X1 [Oncorhynchus mykiss]
gene35271	--	--	Molecular Function: G-protein coupled receptor activity (GO:0004930);; Biological Process: G-protein coupled receptor signaling pathway (GO:0007186);; Cellular Component: integral component of membrane (GO:0016021);;	K08408|1.23348e-180|dre:799203|K08408 G protein-coupled receptor 68 | (RefSeq) ovarian cancer G-protein coupled receptor 1-like	--	--	--	7 transmembrane receptor (rhodopsin family);; Serpentine type 7TM GPCR chemoreceptor Srx	Lysophosphatidic acid receptor 6 OS=Gallus gallus OX=9031 GN=LPAR6 PE=1 SV=1	U	Intracellular trafficking, secretion, and vesicular transport	ovarian cancer G-protein coupled receptor 1-like [Oncorhynchus mykiss]
gene55252	--	--	--	--	--	[T]	Signal transduction mechanisms	Calcium-binding EGF domain;; Complement Clr-like EGF-like;; EGF domain;; MSP1 EGF domain 1;; Human growth factor-like EGF;; EGF-like domain;; Coagulation Factor Xa inhibitory site	Protein kinase C-binding protein NELL2 OS=Xenopus tropicalis OX=8364 GN=nell2 PE=2 SV=1	S	Function unknown	adhesion G protein-coupled receptor E2-like [Oncorhynchus mykiss]
gene21692	[JO]	Translation, ribosomal structure and biogenesis;; Posttranslational modification, protein turnover, chaperones	Molecular Function: procollagen-proline 4-dioxygenase activity (GO:0004656);; Molecular Function: iron ion binding (GO:0005506);; Cellular Component: endoplasmic reticulum (GO:0005783);; Molecular Function: oxidoreductase activity, acting on single donors with incorporation of molecular oxygen, incorporation of two atoms of oxygen (GO:0016702);; Biological Process: peptidyl-proline hydroxylation …	K00472|0|mze:101486537|K00472 prolyl 4-hydroxylase [EC:1.14.11.2] | (RefSeq) p4ha2; prolyl 4-hydroxylase subunit alpha 2	Arginine and proline metabolism (ko00330)	[E]	Amino acid transport and metabolism	Prolyl 4-Hydroxylase alpha-subunit, N-terminal region;; 2OG-Fe(II) oxygenase superfamily	Prolyl 4-hydroxylase subunit alpha-2 OS=Gallus gallus OX=9031 GN=P4HA2 PE=2 SV=1	S	Function unknown	prolyl 4-hydroxylase subunit alpha-2-like isoform X4 [Oncorhynchus mykiss]
gene36796	--	--	Molecular Function: DNA binding (GO:0003677);; Molecular Function: transcription factor activity, sequence-specific DNA binding (GO:0003700);; Cellular Component: nucleus (GO:0005634);; Biological Process: regulation of transcription, DNA-templated (GO:0006355);;	K10172|0|mze:101474984|K10172 brachyury protein | (RefSeq) t; T brachyury transcription factor	--	[K]	Transcription	T-box	Brachyury protein OS=Gallus gallus OX=9031 GN=T PE=2 SV=1	K	Transcription	brachyury protein [Oncorhynchus mykiss]
gene24810	[M]	Cell wall/membrane/envelope biogenesis	--	K12408|0|dre:327462|K12408 cholest-5-ene-3beta,7alpha-diol 3beta-dehydrogenase [EC:1.1.1.181] | (RefSeq) hsd3b7, wu:fc37e10, wu:fi12g10, zgc:55799; hydroxy-delta-5-steroid dehydrogenase, 3 beta- and steroid delta-isomerase	Primary bile acid biosynthesis (ko00120)	[IE]	Lipid transport and metabolism;; Amino acid transport and metabolism	3-beta hydroxysteroid dehydrogenase/isomerase family;; NAD dependent epimerase/dehydratase family;; GDP-mannose 4,6 dehydratase;; Male sterility protein;; Polysaccharide biosynthesis protein;; NAD(P)H-binding;; RmlD substrate binding domain;; Saccharopine dehydrogenase NADP binding domain;; NmrA-like family;; KR domain	Short-chain dehydrogenase/reductase family 42E member 1 OS=Danio rerio OX=7955 GN=sdr42e1 PE=2 SV=1	M	Cell wall/membrane/envelope biogenesis	3 beta-hydroxysteroid dehydrogenase type 7-like [Oncorhynchus mykiss]
Oncorhynchus_mykiss_newGene_26035	--	--	Cellular Component: integral component of membrane (GO:0016021);;	--	--	--	--	--	--	S	Function unknown	unnamed protein product [Oncorhynchus mykiss]
gene39017	--	--	Molecular Function: metalloendopeptidase activity (GO:0004222);; Biological Process: proteolysis (GO:0006508);; Molecular Function: zinc ion binding (GO:0008270);; Cellular Component: integral component of membrane (GO:0016021);;	K06837|1.25037e-171|xma:102228958|K06837 disintegrin and metalloproteinase domain-containing protein 23 [EC:3.4.24.-] | (RefSeq) adam23; ADAM metallopeptidase domain 23	--	[O]	Posttranslational modification, protein turnover, chaperones	Reprolysin family propeptide;; Reprolysin (M12B) family zinc metalloprotease;; ADAM cysteine-rich;; Disintegrin	Disintegrin and metalloproteinase domain-containing protein 11 (Fragment) OS=Xenopus laevis OX=8355 GN=adam11 PE=2 SV=1	S	Function unknown	disintegrin and metalloproteinase domain-containing protein 23-like, partial [Oncorhynchus mykiss]
gene23657	--	--	Molecular Function: calcium ion binding (GO:0005509);; Cellular Component: extracellular region (GO:0005576);; Biological Process: regulation of bone mineralization (GO:0030500);;	--	--	--	--	--	Osteocalcin 2b OS=Oncorhynchus mykiss OX=8022 GN=GSONMT00015798001 PE=1 SV=1	S	Function unknown	osteocalcin 2a [Oncorhynchus kisutch]
gene43090	--	--	--	K06232|4.32867e-105|mze:101463571|K06232 growth arrest-specific 1 | (RefSeq) growth arrest-specific protein 1-like	Hedgehog signaling pathway (ko04340)	--	--	GDNF/GAS1 domain	--	S	Function unknown	growth arrest-specific protein 1-like [Oncorhynchus mykiss]
gene39506	--	--	--	--	--	[L]	Replication, recombination and repair	hAT family C-terminal dimerisation region	--	S	Function unknown	zinc finger BED domain-containing protein 1-like [Oncorhynchus mykiss]
gene45076	--	--	Cellular Component: integral component of membrane (GO:0016021);;	--	--	--	--	Domain of unknown function (DUF4690)	--	S	Function unknown	uncharacterized protein C2orf82-like [Oncorhynchus mykiss]
gene31810	[O]	Posttranslational modification, protein turnover, chaperones	Biological Process: protein peptidyl-prolyl isomerization (GO:0000413);; Molecular Function: peptidyl-prolyl cis-trans isomerase activity (GO:0003755);; Biological Process: protein folding (GO:0006457);;	K12733|3.46386e-100|xma:102229512|K12733 peptidyl-prolyl cis-trans isomerase-like 1 [EC:5.2.1.8] | (RefSeq) ppil1; peptidylprolyl isomerase like 1	Spliceosome (ko03040)	[O]	Posttranslational modification, protein turnover, chaperones	Cyclophilin type peptidyl-prolyl cis-trans isomerase/CLD	Peptidyl-prolyl cis-trans isomerase CWC27 homolog OS=Xenopus laevis OX=8355 GN=cwc27 PE=2 SV=1	O	Posttranslational modification, protein turnover, chaperones	PREDICTED: peptidyl-prolyl cis-trans isomerase-like 1 [Salmo salar]
Oncorhynchus_mykiss_newGene_723	--	--	--	--	--	--	--	--	--	--	--	PREDICTED: piggyBac transposable element-derived protein 3-like [Salmo salar]
gene12870	[MU]	Cell wall/membrane/envelope biogenesis;; Intracellular trafficking, secretion, and vesicular transport	Cellular Component: integral component of membrane (GO:0016021);; Molecular Function: semaphorin receptor activity (GO:0017154);; Biological Process: semaphorin-plexin signaling pathway (GO:0071526);;	K06820|0|mze:101472029|K06820 plexin A | (RefSeq) plxna2; plexin A2	--	[T]	Signal transduction mechanisms	Plexin cytoplasmic RasGAP domain;; Sema domain;; IPT/TIG domain;; Plexin repeat	Plexin-A4 OS=Danio rerio OX=7955 GN=plxna4 PE=2 SV=1	S	Function unknown	plexin-A2-like [Oncorhynchus mykiss]
gene41500	--	--	--	--	--	--	--	--	--	S	Function unknown	fibrous sheath CABYR-binding protein-like [Oncorhynchus mykiss]
gene23514	--	--	Biological Process: vasculature development (GO:0001944);; Molecular Function: carbohydrate binding (GO:0030246);;	K10090|5.62052e-38|mze:101486584|K10090 galectin-2 | (RefSeq) beta-galactoside-binding lectin-like	--	[W]	Extracellular structures	Galactoside-binding lectin	Beta-galactoside-binding lectin OS=Electrophorus electricus OX=8005 PE=1 SV=1	S	Function unknown	unnamed protein product [Oncorhynchus mykiss]
gene592	--	--	Molecular Function: structural molecule activity (GO:0005198);; Cellular Component: intermediate filament (GO:0005882);;	K10376|0|mze:101475263|K10376 desmuslin | (RefSeq) synm; synemin	--	--	--	Intermediate filament protein	Desmin OS=Gallus gallus OX=9031 GN=DES PE=1 SV=1	S	Function unknown	synemin-like [Oncorhynchus mykiss]
gene218	--	--	--	K12394|1.10786e-27|phi:102114397|K12394 AP-1 complex subunit sigma 1/2 | (RefSeq) DNA-directed RNA polymerase II subunit RPB1-like	Lysosome (ko04142)	--	--	--	--	S	Function unknown	keratin, type I cytoskeletal 9-like isoform X1 [Oncorhynchus mykiss]
gene47910	--	--	Cellular Component: integral component of membrane (GO:0016021);; Molecular Function: substrate-specific transmembrane transporter activity (GO:0022891);; Biological Process: transmembrane transport (GO:0055085);;	K08143|1.27351e-41|tru:101075508|K08143 MFS transporter, SP family, solute carrier family 2 (facilitated glucose/fructose transporter), member 5 | (RefSeq) solute carrier family 2, facilitated glucose transporter member 5-like	--	[G]	Carbohydrate transport and metabolism	Sugar (and other) transporter	Solute carrier family 2, facilitated glucose transporter member 1 OS=Gallus gallus OX=9031 GN=SLC2A1 PE=2 SV=1	G	Carbohydrate transport and metabolism	solute carrier family 2, facilitated glucose transporter member 5-like, partial [Oncorhynchus mykiss]
Oncorhynchus_mykiss_newGene_32705	--	--	Cellular Component: ribosome (GO:0005840);;	K17421|3.09027e-17|xma:102225326|K17421 large subunit ribosomal protein L40 | (RefSeq) mrpl40; mitochondrial ribosomal protein L40	--	[J]	Translation, ribosomal structure and biogenesis	--	--	S	Function unknown	39S ribosomal protein L40, mitochondrial isoform X3 [Oncorhynchus kisutch]
gene10712	[J]	Translation, ribosomal structure and biogenesis	Molecular Function: structural constituent of ribosome (GO:0003735);; Cellular Component: ribosome (GO:0005840);; Biological Process: translation (GO:0006412);; Molecular Function: rRNA binding (GO:0019843);; Molecular Function: metal ion binding (GO:0046872);;	K02922|1.09246e-52|xma:102232701|K02922 large subunit ribosomal protein L37e | (RefSeq) rpl37; ribosomal protein L37	Ribosome (ko03010)	[J]	Translation, ribosomal structure and biogenesis	Ribosomal protein L37e	60S ribosomal protein L37 OS=Ictalurus punctatus OX=7998 GN=rpl37 PE=3 SV=3	J	Translation, ribosomal structure and biogenesis	60S ribosomal protein L37-like [Oncorhynchus mykiss]
gene54927	--	--	--	--	--	--	--	--	--	--	--	kinesin-like protein KIF3B [Oncorhynchus mykiss]
gene10916	[E]	Amino acid transport and metabolism	Molecular Function: cation:chloride symporter activity (GO:0015377);; Cellular Component: integral component of membrane (GO:0016021);; Biological Process: chloride transmembrane transport (GO:1902476);;	K10951|0|ola:101171840|K10951 solute carrier family 12 (sodium/potassium/chloride transporter), member 2 | (RefSeq) slc12a2; solute carrier family 12 member 2	--	[P]	Inorganic ion transport and metabolism	Solute carrier family 12;; Amino acid permease;; Amino acid permease N-terminal	Solute carrier family 12 member 2 OS=Squalus acanthias OX=7797 GN=SLC12A2 PE=1 SV=1	E	Amino acid transport and metabolism	solute carrier family 12 member 2-like [Oncorhynchus mykiss]
gene1964	--	--	Molecular Function: nucleic acid binding (GO:0003676);; Molecular Function: metal ion binding (GO:0046872);;	K05417|3.73556e-62|mze:101464880|K05417 interleukin 11 | (RefSeq) uncharacterized LOC101464880	Cytokine-cytokine receptor interaction (ko04060)	--	--	Interleukin 11	--	S	Function unknown	interleukin-11 precursor [Oncorhynchus mykiss]
gene24454	--	--	Molecular Function: oxygen transporter activity (GO:0005344);; Molecular Function: iron ion binding (GO:0005506);; Cellular Component: hemoglobin complex (GO:0005833);; Biological Process: oxygen transport (GO:0015671);; Molecular Function: oxygen binding (GO:0019825);; Molecular Function: heme binding (GO:0020037);;	--	--	[C]	Energy production and conversion	Globin	Hemoglobin subunit beta OS=Cottoperca gobio OX=56716 GN=hbb PE=1 SV=2	C	Energy production and conversion	hemoglobin subunit beta-like [Oncorhynchus mykiss]
gene21438	--	--	Molecular Function: purinergic nucleotide receptor activity (GO:0001614);; Molecular Function: extracellular ATP-gated cation channel activity (GO:0004931);; Molecular Function: ATP binding (GO:0005524);; Cellular Component: integral component of plasma membrane (GO:0005887);; Biological Process: response to ATP (GO:0033198);; Biological Process: purinergic nucleotide receptor signaling pathway (…	K05219|0|ola:101173001|K05219 P2X purinoceptor 5 | (RefSeq) P2X purinoceptor 5-like	Calcium signaling pathway (ko04020);; Neuroactive ligand-receptor interaction (ko04080)	--	--	ATP P2X receptor	--	U	Intracellular trafficking, secretion, and vesicular transport	P2X purinoceptor 5-like [Oncorhynchus mykiss]
gene46441	--	--	Molecular Function: beta-galactoside (CMP) alpha-2,3-sialyltransferase activity (GO:0003836);; Biological Process: protein glycosylation (GO:0006486);; Cellular Component: integral component of Golgi membrane (GO:0030173);; Biological Process: sialylation (GO:0097503);;	K00780|2.05271e-130|mze:101464078|K00780 beta-galactoside alpha-2,3-sialyltransferase (sialyltransferase 4A) [EC:2.4.99.4] | (RefSeq) CMP-N-acetylneuraminate-beta-galactosamide-alpha-2,3-sialyltransferase 1-like	Mucin type O-Glycan biosynthesis (ko00512);; Glycosaminoglycan biosynthesis - keratan sulfate (ko00533);; Glycosphingolipid biosynthesis - globo series (ko00603);; Glycosphingolipid biosynthesis - ganglio series (ko00604)	[G]	Carbohydrate transport and metabolism	Glycosyltransferase family 29 (sialyltransferase)	CMP-N-acetylneuraminate-beta-galactosamide-alpha-2,3-sialyltransferase 1 OS=Gallus gallus OX=9031 GN=ST3GAL1 PE=2 SV=1	S	Function unknown	CMP-N-acetylneuraminate-beta-galactosamide-alpha-2,3-sialyltransferase 1-like [Oncorhynchus mykiss]
gene34285	--	--	Cellular Component: integral component of membrane (GO:0016021);;	--	--	[R]	General function prediction only	10 TM Acyl Transferase domain found in Cas1p	N-acetylneuraminate 9-O-acetyltransferase OS=Danio rerio OX=7955 GN=casd1 PE=2 SV=2	S	Function unknown	CAS1 domain-containing protein 1-like isoform X1 [Oncorhynchus mykiss]
gene38275	--	--	Molecular Function: G-protein coupled receptor activity (GO:0004930);; Biological Process: G-protein coupled receptor signaling pathway (GO:0007186);; Cellular Component: integral component of membrane (GO:0016021);;	K08410|0|xma:102236564|K08410 G protein-coupled receptor 18 | (RefSeq) gpr18; G protein-coupled receptor 18	--	--	--	7 transmembrane receptor (rhodopsin family);; Serpentine type 7TM GPCR chemoreceptor Srx	Lysophosphatidic acid receptor 6 OS=Gallus gallus OX=9031 GN=LPAR6 PE=1 SV=1	U	Intracellular trafficking, secretion, and vesicular transport	N-arachidonyl glycine receptor [Oncorhynchus mykiss]
gene54824	--	--	Molecular Function: serine-type endopeptidase activity (GO:0004252);; Molecular Function: thiosulfate sulfurtransferase activity (GO:0004792);; Molecular Function: cytokine receptor activity (GO:0004896);; Biological Process: proteolysis (GO:0006508);; Cellular Component: integral component of membrane (GO:0016021);; Biological Process: cytokine-mediated signaling pathway (GO:0019221);;	K09637|4.69211e-80|mze:101464220|K09637 transmembrane protease serine 6 [EC:3.4.21.-] | (RefSeq) tmprss6; transmembrane protease, serine 6	--	[E]	Amino acid transport and metabolism	Low-density lipoprotein receptor domain class A	Very low-density lipoprotein receptor OS=Gallus gallus OX=9031 GN=VLDLR PE=1 SV=1	O	Posttranslational modification, protein turnover, chaperones	transmembrane protease serine 6-like [Oncorhynchus mykiss]
gene3841	--	--	Cellular Component: membrane (GO:0016020);;	--	--	[S]	Function unknown	RDD family	--	S	Function unknown	protein FAM8A1-like [Oncorhynchus kisutch]
gene14429	[R]	General function prediction only	Molecular Function: GTP binding (GO:0005525);; Cellular Component: intracellular (GO:0005622);; Biological Process: small GTPase mediated signal transduction (GO:0007264);; Biological Process: notochord cell vacuolation (GO:0060036);;	K07918|2.49708e-138|mze:101483730|K07918 Ras-related protein Rab-32 | (RefSeq) rab32; RAB32, member RAS oncogene family	--	[T]	Signal transduction mechanisms	Ras family;; Ras of Complex, Roc, domain of DAPkinase;; ADP-ribosylation factor family;; Gtr1/RagA G protein conserved region	Ras-related protein rab7 OS=Epinephelus coioides OX=94232 GN=rab7 PE=1 SV=1	S	Function unknown	ras-related protein Rab-32-like [Oncorhynchus kisutch]
gene22991	--	--	--	K06231|3.64912e-48|bfo:BRAFLDRAFT_117107|K06231 hedgehog interacting protein | (RefSeq) hedgehog interacting protein-like protein	--	--	--	Amyotrophic lateral sclerosis 2 chromosomal region candidate gene 8	--	S	Function unknown	uncharacterized protein LOC110538799 [Oncorhynchus mykiss]
Oncorhynchus_mykiss_newGene_32600	--	--	Molecular Function: DNA binding (GO:0003677);; Biological Process: transposition, DNA-mediated (GO:0006313);; Biological Process: DNA integration (GO:0015074);;	--	--	--	--	Transposase;; Homeodomain-like domain	--	--	--	Tc1-like transporase [Oncorhynchus mykiss]
gene10786	[J]	Translation, ribosomal structure and biogenesis	Molecular Function: nucleotide binding (GO:0000166);; Molecular Function: RNA binding (GO:0003723);;	K13195|3.81823e-34|mze:101465129|K13195 cold-inducible RNA-binding protein | (RefSeq) cirbp; cold inducible RNA binding protein	--	[R]	General function prediction only	RNA recognition motif. (a.k.a. RRM, RBD, or RNP domain)	Cold-inducible RNA-binding protein B OS=Xenopus laevis OX=8355 GN=cirbp-b PE=1 SV=1	S	Function unknown	glycine-rich RNA-binding protein 1-like [Oncorhynchus mykiss]
gene34234	--	--	Molecular Function: oxidoreductase activity (GO:0016491);; Biological Process: oxidation-reduction process (GO:0055114);;	--	--	[HC]	Coenzyme transport and metabolism;; Energy production and conversion	--	Oxidoreductase NAD-binding domain-containing protein 1 OS=Xenopus laevis OX=8355 GN=oxnad1 PE=2 SV=1	C	Energy production and conversion	unnamed protein product [Oncorhynchus mykiss]
Oncorhynchus_mykiss_newGene_9707	--	--	Molecular Function: protein dimerization activity (GO:0046983);;	K09106|3.91807e-38|mze:101475720|K09106 upstream stimulatory factor | (RefSeq) upstream stimulatory factor 2-like	--	[K]	Transcription	--	Upstream stimulatory factor 1 OS=Xenopus borealis OX=8354 GN=usf1 PE=2 SV=1	K	Transcription	upstream stimulatory factor 2-like isoform X1 [Oncorhynchus kisutch]
gene26144	--	--	Biological Process: calcium ion transport (GO:0006816);; Cellular Component: integral component of membrane (GO:0016021);;	K04871|2.63396e-85|xma:102226926|K04871 voltage-dependent calcium channel gamma-6 | (RefSeq) voltage-dependent calcium channel gamma-6 subunit-like	MAPK signaling pathway (ko04010);; Cardiac muscle contraction (ko04260);; Adrenergic signaling in cardiomyocytes (ko04261)	--	--	PMP-22/EMP/MP20/Claudin tight junction;; PMP-22/EMP/MP20/Claudin family	--	U	Intracellular trafficking, secretion, and vesicular transport	voltage-dependent calcium channel gamma-6 subunit-like [Oncorhynchus mykiss]
Oncorhynchus_mykiss_newGene_65156	--	--	--	K20045|2.2704e-21|xma:102223116|K20045 intersectin | (RefSeq) intersectin-2-like	--	[TU]	Signal transduction mechanisms;; Intracellular trafficking, secretion, and vesicular transport	Cytoskeletal-regulatory complex EF hand	Intersectin-1 OS=Xenopus laevis OX=8355 GN=itsn1 PE=1 SV=1	T	Signal transduction mechanisms	intersectin-2-like [Oncorhynchus mykiss]
Oncorhynchus_mykiss_newGene_64704	--	--	--	--	--	--	--	--	--	--	--	5&apos;-nucleotidase-like isoform X2 [Oncorhynchus kisutch]
gene46245	--	--	--	--	--	--	--	MAP7 (E-MAP-115) family	Ensconsin OS=Gallus gallus OX=9031 GN=MAP7 PE=2 SV=1	S	Function unknown	MAP7 domain-containing protein 2-like isoform X5 [Oncorhynchus mykiss]
gene43499	--	--	Molecular Function: structural molecule activity (GO:0005198);; Cellular Component: plasma membrane (GO:0005886);; Cellular Component: bicellular tight junction (GO:0005923);; Cellular Component: integral component of membrane (GO:0016021);;	K06087|5.21823e-57|tru:101068555|K06087 claudin | (RefSeq) claudin-15-like	Cell adhesion molecules (CAMs) (ko04514);; Tight junction (ko04530)	--	--	PMP-22/EMP/MP20/Claudin family	Claudin-7-A OS=Danio rerio OX=7955 GN=cldn7a PE=2 SV=1	S	Function unknown	claudin-15-like [Oncorhynchus mykiss]
gene7417	--	--	Molecular Function: ubiquitin-protein transferase activity (GO:0004842);; Molecular Function: metal ion binding (GO:0046872);;	K10307|0|dre:393404|K10307 F-box protein 30 | (RefSeq) fbxo30b, zgc:63466; F-box protein 30b	--	--	--	F-box;; TRAF-like zinc-finger;; F-box domain	--	--	--	F-box only protein 30-like [Oncorhynchus mykiss]
gene47001	--	--	Biological Process: regulation of cell growth (GO:0001558);; Cellular Component: plasma membrane (GO:0005886);; Cellular Component: cell-cell junction (GO:0005911);; Biological Process: cytoskeletal anchoring at plasma membrane (GO:0007016);;	--	--	--	--	--	--	--	--	trichohyalin-like [Oncorhynchus mykiss]
gene32066	[J]	Translation, ribosomal structure and biogenesis	Molecular Function: nucleotide binding (GO:0000166);; Molecular Function: nucleic acid binding (GO:0003676);;	K12892|1.38779e-50|xma:102229957|K12892 splicing factor, arginine/serine-rich 3 | (RefSeq) serine/arginine-rich splicing factor 3-like	Spliceosome (ko03040);; Herpes simplex infection (ko05168)	[A]	RNA processing and modification	RNA recognition motif. (a.k.a. RRM, RBD, or RNP domain)	Serine/arginine-rich splicing factor 1A OS=Danio rerio OX=7955 GN=srsf1a PE=2 SV=2	S	Function unknown	serine/arginine-rich splicing factor 3 [Salvelinus alpinus]
gene25349	--	--	Molecular Function: nucleotide binding (GO:0000166);; Molecular Function: nucleic acid binding (GO:0003676);; Cellular Component: viral nucleocapsid (GO:0019013);; Cellular Component: intracellular ribonucleoprotein complex (GO:0030529);;	--	--	[R]	General function prediction only	RNA recognition motif. (a.k.a. RRM, RBD, or RNP domain)	Heterogeneous nuclear ribonucleoprotein A3 homolog 2 OS=Xenopus laevis OX=8355 PE=2 SV=1	S	Function unknown	heterogeneous nuclear ribonucleoprotein A1-like [Oncorhynchus mykiss]
gene46981	--	--	Cellular Component: membrane (GO:0016020);;	--	--	[L]	Replication, recombination and repair	Calcineurin-like phosphoesterase	Metallophosphoesterase 1 OS=Danio rerio OX=7955 GN=mppe1 PE=2 SV=1	S	Function unknown	metallophosphoesterase 1-like, partial [Oncorhynchus mykiss]
gene31557	--	--	Cellular Component: nucleosome (GO:0000786);; Molecular Function: DNA binding (GO:0003677);; Cellular Component: nucleus (GO:0005634);; Molecular Function: protein heterodimerization activity (GO:0046982);;	K11252|3.03203e-49|dre:570661|K11252 histone H2B | (RefSeq) zgc:194998; zgc:194989	--	[B]	Chromatin structure and dynamics	Core histone H2A/H2B/H3/H4;; Histone-like transcription factor (CBF/NF-Y) and archaeal histone	Histone H2B OS=Salmo trutta OX=8032 PE=1 SV=2	B	Chromatin structure and dynamics	histone H2B-like [Oncorhynchus mykiss]
gene26761	--	--	--	K20316|2.54242e-44|mze:101482354|K20316 short coiled-coil protein | (RefSeq) scoc; short coiled-coil protein	--	[R]	General function prediction only	Predicted coiled-coil protein (DUF2205)	Short coiled-coil protein A OS=Danio rerio OX=7955 GN=scoca PE=3 SV=1	S	Function unknown	Short coiled-coil protein A [Larimichthys crocea]
gene35057	[H]	Coenzyme transport and metabolism	Molecular Function: GTP cyclohydrolase I activity (GO:0003934);; Cellular Component: cytoplasm (GO:0005737);; Biological Process: tetrahydrofolate biosynthetic process (GO:0046654);;	K01495|4.69592e-135|dre:100192219|K01495 GTP cyclohydrolase I [EC:3.5.4.16] | (RefSeq) gch1, gch1a, wu:fc16b10, zgc:195269; GTP cyclohydrolase 1	Folate biosynthesis (ko00790)	[H]	Coenzyme transport and metabolism	GTP cyclohydrolase I	GTP cyclohydrolase 1 (Fragment) OS=Oncorhynchus mykiss OX=8022 GN=gch1 PE=2 SV=1	H	Coenzyme transport and metabolism	GTP cyclohydrolase 1-like [Oncorhynchus mykiss]
gene50477	--	--	--	K11422|2.10435e-32|mze:101469655|K11422 histone-lysine N-methyltransferase SETD1 [EC:2.1.1.43] | (RefSeq) setd1a; SET domain containing 1A	Lysine degradation (ko00310)	--	--	--	Histone-lysine N-methyltransferase SETD1B-A OS=Danio rerio OX=7955 GN=setd1ba PE=1 SV=2	S	Function unknown	histone-lysine N-methyltransferase SETD1A-like isoform X1 [Oncorhynchus mykiss]
gene35494	--	--	Molecular Function: GTPase activator activity (GO:0005096);; Biological Process: actin cytoskeleton reorganization (GO:0031532);; Biological Process: positive regulation of GTPase activity (GO:0043547);; Biological Process: regulation of dendrite morphogenesis (GO:0048814);; Biological Process: regulation of small GTPase mediated signal transduction (GO:0051056);;	K17701|0|mze:101484001|K17701 signal-induced proliferation-associated 1 like protein 1 | (RefSeq) signal-induced proliferation-associated 1-like protein 1	--	[T]	Signal transduction mechanisms	C-terminal domain of SPAR protein;; Rap/ran-GAP	Rap1 GTPase-activating protein 2 OS=Gallus gallus OX=9031 GN=RAP1GAP2 PE=2 SV=2	S	Function unknown	signal-induced proliferation-associated 1-like protein 1 isoform X1 [Oncorhynchus mykiss]
gene25688	--	--	Cellular Component: integral component of membrane (GO:0016021);;	K20732|2.92639e-79|dre:563348|K20732 transmembrane glycoprotein NMB | (RefSeq) gpnmb, si:ch211-155k24.6; glycoprotein (transmembrane) nmb	--	--	--	--	Protein QNR-71 OS=Coturnix japonica OX=93934 GN=QNR-71 PE=2 SV=2	S	Function unknown	protein QNR-71-like [Oncorhynchus mykiss]
Oncorhynchus_mykiss_newGene_37913	--	--	--	--	--	--	--	--	--	S	Function unknown	PREDICTED: uncharacterized protein LOC106578200 [Salmo salar]
gene28951	--	--	Molecular Function: G-protein coupled serotonin receptor activity (GO:0004993);; Cellular Component: integral component of plasma membrane (GO:0005887);; Biological Process: smooth muscle contraction (GO:0006939);; Biological Process: serotonin receptor signaling pathway (GO:0007210);; Biological Process: chemical synaptic transmission (GO:0007268);; Biological Process: circadian rhythm (GO:00076…	K04163|0|dre:100536080|K04163 5-hydroxytryptamine receptor 7 | (RefSeq) 5-hydroxytryptamine receptor 7-like	Calcium signaling pathway (ko04020);; Neuroactive ligand-receptor interaction (ko04080)	[R]	General function prediction only	7 transmembrane receptor (rhodopsin family);; Serpentine type 7TM GPCR chemoreceptor Srsx	5-hydroxytryptamine receptor 7 OS=Xenopus laevis OX=8355 GN=htr7 PE=2 SV=1	U	Intracellular trafficking, secretion, and vesicular transport	5-hydroxytryptamine receptor 7-like [Oncorhynchus mykiss]
gene6391	--	--	Molecular Function: RNA polymerase II transcription factor activity, sequence-specific DNA binding (GO:0000981);; Cellular Component: nucleus (GO:0005634);; Biological Process: regulation of transcription, DNA-templated (GO:0006355);; Molecular Function: sequence-specific DNA binding (GO:0043565);;	--	--	[K]	Transcription	Forkhead domain	Forkhead box protein B2 OS=Xenopus laevis OX=8355 GN=foxb2 PE=2 SV=1	K	Transcription	forkhead box protein D4-like [Oncorhynchus mykiss]
gene34840	--	--	Molecular Function: nucleic acid binding (GO:0003676);; Molecular Function: metal ion binding (GO:0046872);;	--	--	[R]	General function prediction only	--	Gastrula zinc finger protein XlCGF67.1 (Fragment) OS=Xenopus laevis OX=8355 PE=3 SV=1	S	Function unknown	B-cell CLL/lymphoma 6 member B protein-like isoform X1 [Oncorhynchus mykiss]
gene6466	--	--	Biological Process: regulation of transcription, DNA-templated (GO:0006355);;	K15187|5.40076e-159|xma:102236076|K15187 YEATS domain-containing protein 1/3 | (RefSeq) mllt1; MLLT1, super elongation complex subunit	--	[K]	Transcription	YEATS family	--	K	Transcription	protein ENL-like [Oncorhynchus mykiss]
gene36516	--	--	Molecular Function: zinc ion binding (GO:0008270);;	K10665|4.99823e-33|lcm:102349670|K10665 E3 ubiquitin-protein ligase MARCH10 [EC:2.3.2.27] | (RefSeq) MARCH10; membrane associated ring-CH-type finger 10	--	[A]	RNA processing and modification	RING-variant domain	E3 ubiquitin-protein ligase MARCH8 OS=Xenopus laevis OX=8355 GN=march8 PE=2 SV=2	O	Posttranslational modification, protein turnover, chaperones	probable E3 ubiquitin-protein ligase MARCH10 [Oncorhynchus mykiss]
gene23595	--	--	--	--	--	--	--	--	--	--	--	paralemmin-3-like [Oncorhynchus mykiss]
gene15135	--	--	--	K20054|0|mze:101463886|K20054 disabled homolog 1 | (RefSeq) disabled homolog 1	--	[T]	Signal transduction mechanisms	Phosphotyrosine interaction domain (PTB/PID)	PTB domain-containing engulfment adapter protein 1 OS=Danio rerio OX=7955 GN=gulp1 PE=2 SV=1	U	Intracellular trafficking, secretion, and vesicular transport	disabled homolog 1-like [Oncorhynchus mykiss]
gene1113	--	--	--	--	--	--	--	Immunoglobulin I-set domain;; Immunoglobulin domain;; Immunoglobulin domain;; Immunoglobulin domain;; Immunoglobulin V-set domain	Myosin light chain kinase, smooth muscle OS=Gallus gallus OX=9031 GN=Mylk PE=1 SV=2	S	Function unknown	myopalladin-like isoform X1 [Oncorhynchus mykiss]
gene4529	--	--	--	--	--	--	--	Immunoglobulin domain;; Immunoglobulin domain;; Immunoglobulin domain;; Immunoglobulin I-set domain	--	--	--	uncharacterized protein LOC110509875 [Oncorhynchus mykiss]
gene52705	--	--	Cellular Component: integral component of membrane (GO:0016021);;	--	--	[T]	Signal transduction mechanisms	Leucine rich repeat;; Leucine Rich repeats (2 copies)	Peroxidasin OS=Xenopus tropicalis OX=8364 GN=pxdn PE=2 SV=1	S	Function unknown	leucine-rich repeats and immunoglobulin-like domains protein 1, partial [Oncorhynchus mykiss]
gene19429	[K]	Transcription	Biological Process: signal transduction (GO:0007165);; Cellular Component: integral component of membrane (GO:0016021);;	K18808|0|xma:102222731|K18808 toll-like receptor 13 | (RefSeq) uncharacterized LOC102222731	--	[T]	Signal transduction mechanisms	Leucine rich repeat;; Leucine Rich repeats (2 copies);; TIR domain;; Leucine rich repeats (6 copies);; Leucine-rich repeat;; TIR domain;; Leucine Rich repeat;; Leucine Rich Repeat	Toll-like receptor 2 type-2 OS=Gallus gallus OX=9031 GN=TLR2-2 PE=2 SV=1	S	Function unknown	toll-like receptor 13 [Oncorhynchus mykiss]
gene37255	--	--	Cellular Component: chromatin (GO:0000785);; Molecular Function: DNA binding (GO:0003677);; Cellular Component: nucleus (GO:0005634);; Cellular Component: cytoplasm (GO:0005737);; Biological Process: negative regulation of double-strand break repair via homologous recombination (GO:2000042);;	--	--	--	--	--	PCNA-interacting partner OS=Danio rerio OX=7955 GN=parpbp PE=2 SV=1	S	Function unknown	PCNA-interacting partner-like [Oncorhynchus mykiss]
Oncorhynchus_mykiss_newGene_52536	--	--	--	--	--	--	--	--	--	--	--	unnamed protein product [Oncorhynchus mykiss]
gene14962	[S]	Function unknown	Biological Process: negative regulation of peptidase activity (GO:0010466);; Cellular Component: integral component of membrane (GO:0016021);; Molecular Function: peptidase inhibitor activity (GO:0030414);; Cellular Component: extracellular exosome (GO:0070062);;	--	--	[S]	Function unknown	Cysteine-rich secretory protein family	Peptidase inhibitor 15 OS=Gallus gallus OX=9031 GN=PI15 PE=2 SV=1	S	Function unknown	peptidase inhibitor 15-like [Oncorhynchus mykiss]
gene33767	--	--	Cellular Component: integral component of membrane (GO:0016021);;	--	--	--	--	--	--	S	Function unknown	uncharacterized protein LOC110496214 isoform X1 [Oncorhynchus mykiss]
gene39478	[R]	General function prediction only	Molecular Function: sulfotransferase activity (GO:0008146);; Biological Process: cellular response to xenobiotic stimulus (GO:0071466);;	--	--	[R]	General function prediction only	Sulfotransferase domain	Sulfotransferase family cytosolic 1B member 1 OS=Gallus gallus OX=9031 GN=SULT1B1 PE=2 SV=1	S	Function unknown	sulfotransferase 6B1-like [Oncorhynchus mykiss]
gene16374	--	--	Cellular Component: integral component of membrane (GO:0016021);;	K06263|2.20613e-66|mze:101469620|K06263 platelet glycoprotein IX | (RefSeq) platelet glycoprotein Ib beta chain-like	ECM-receptor interaction (ko04512)	[R]	General function prediction only	--	Leucine-rich repeat transmembrane protein FLRT3 OS=Xenopus laevis OX=8355 GN=flrt3 PE=1 SV=2	S	Function unknown	unnamed protein product [Oncorhynchus mykiss]
gene17393	[D]	Cell cycle control, cell division, chromosome partitioning	Biological Process: cell proliferation (GO:0008283);; Cellular Component: Cajal body (GO:0015030);; Biological Process: protein desumoylation (GO:0016926);; Biological Process: Cajal body organization (GO:0030576);; Molecular Function: SUMO binding (GO:0032183);; Molecular Function: SUMO-specific isopeptidase activity (GO:0070140);;	--	--	--	--	Ubiquitin-specific peptidase-like, SUMO isopeptidase;; Domain of unknown function (DUF4650)	SUMO-specific isopeptidase USPL1 OS=Danio rerio OX=7955 GN=uspl1 PE=1 SV=1	O	Posttranslational modification, protein turnover, chaperones	SUMO-specific isopeptidase USPL1-like [Oncorhynchus mykiss]
gene6488	[MDT]	Cell wall/membrane/envelope biogenesis;; Cell cycle control, cell division, chromosome partitioning;; Signal transduction mechanisms	Molecular Function: ATP binding (GO:0005524);;	K12196|0|ola:101160844|K12196 vacuolar protein-sorting-associated protein 4 | (RefSeq) vps4b; vacuolar protein sorting 4 homolog B	Endocytosis (ko04144)	[O]	Posttranslational modification, protein turnover, chaperones	ATPase family associated with various cellular activities (AAA);; Vps4 C terminal oligomerisation domain;; MIT (microtubule interacting and transport) domain;; IstB-like ATP binding protein;; TIP49 C-terminus;; AAA domain (dynein-related subfamily);; Holliday junction DNA helicase ruvB N-terminus;; AAA domain (Cdc48 subfamily)	Katanin p60 ATPase-containing subunit A-like 1 OS=Danio rerio OX=7955 GN=katnal1 PE=2 SV=1	O	Posttranslational modification, protein turnover, chaperones	vacuolar protein sorting-associated protein 4B-like [Oncorhynchus mykiss]
gene27565	[O]	Posttranslational modification, protein turnover, chaperones	--	K00476|0|tru:101061760|K00476 aspartate beta-hydroxylase [EC:1.14.11.16] | (RefSeq) aspartyl/asparaginyl beta-hydroxylase-like	--	[O]	Posttranslational modification, protein turnover, chaperones	Aspartyl/Asparaginyl beta-hydroxylase;; Aspartyl beta-hydroxylase N-terminal region;; Tetratricopeptide repeat;; Tetratricopeptide repeat;; Tetratricopeptide repeat;; Tetratricopeptide repeat;; Tetratricopeptide repeat;; Tetratricopeptide repeat;; Tetratricopeptide repeat;; TPR repeat	Aspartate beta-hydroxylase domain-containing protein 2 OS=Xenopus tropicalis OX=8364 GN=asphd2 PE=2 SV=1	O	Posttranslational modification, protein turnover, chaperones	aspartyl/asparaginyl beta-hydroxylase-like isoform X2 [Oncorhynchus mykiss]
Oncorhynchus_mykiss_newGene_3941	--	--	--	--	--	[O]	Posttranslational modification, protein turnover, chaperones	--	--	O	Posttranslational modification, protein turnover, chaperones	PREDICTED: proprotein convertase subtilisin/kexin type 6-like [Cyprinus carpio]
gene50821	--	--	--	--	--	--	--	dDENN domain;; Pentapeptide repeats (8 copies)	--	S	Function unknown	uncharacterized protein LOC110514845 [Oncorhynchus mykiss]
Oncorhynchus_mykiss_newGene_52686	--	--	Molecular Function: DNA binding (GO:0003677);; Biological Process: transposition, DNA-mediated (GO:0006313);; Biological Process: DNA integration (GO:0015074);;	--	--	--	--	Domain of unknown function (DUF4744)	--	S	Function unknown	TC1-like transposase [Cyprinus carpio]
gene23673	--	--	--	--	--	[R]	General function prediction only	Zinc finger, C2H2 type;; Zinc-finger double domain;; C2H2-type zinc finger	Ras-responsive element-binding protein 1 OS=Gallus gallus OX=9031 GN=RREB1 PE=2 SV=2	S	Function unknown	B-cell lymphoma/leukemia 11A-like [Oncorhynchus mykiss]
gene3382	[T]	Signal transduction mechanisms	Molecular Function: DNA binding (GO:0003677);; Molecular Function: transcription factor activity, sequence-specific DNA binding (GO:0003700);; Cellular Component: nucleus (GO:0005634);; Cellular Component: transcription factor complex (GO:0005667);; Cellular Component: cytoplasm (GO:0005737);; Biological Process: regulation of transcription, DNA-templated (GO:0006355);; Biological Process: circad…	K02296|0|mze:101470055|K02296 aryl hydrocarbon receptor nuclear translocator-like protein 1 | (RefSeq) aryl hydrocarbon receptor nuclear translocator-like protein 2	Herpes simplex infection (ko05168)	[K]	Transcription	PAS domain;; PAS fold;; PAS fold;; Helix-loop-helix DNA-binding domain;; PAS domain;; PAS fold	Aryl hydrocarbon receptor nuclear translocator-like protein 2 OS=Gallus gallus OX=9031 GN=ARNTL2 PE=1 SV=1	K	Transcription	aryl hydrocarbon receptor nuclear translocator-like protein 2 isoform X1 [Oncorhynchus mykiss]
gene34531	--	--	Cellular Component: nucleus (GO:0005634);; Cellular Component: cytoplasm (GO:0005737);; Cellular Component: integral component of membrane (GO:0016021);; Biological Process: transmembrane transport (GO:0055085);;	K08230|3.77382e-179|xma:102226063|K08230 MFS transporter, LAT3 family, solute carrier family 43, member 3 | (RefSeq) solute carrier family 43 member 3-like	--	--	--	Major Facilitator Superfamily	Large neutral amino acids transporter small subunit 4 OS=Xenopus tropicalis OX=8364 GN=slc43a2 PE=2 SV=1	U	Intracellular trafficking, secretion, and vesicular transport	solute carrier family 43 member 3-like [Oncorhynchus mykiss]
gene37904	--	--	Molecular Function: Rho guanyl-nucleotide exchange factor activity (GO:0005089);; Molecular Function: GTPase activator activity (GO:0005096);; Biological Process: regulation of Rho protein signal transduction (GO:0035023);; Biological Process: positive regulation of GTPase activity (GO:0043547);;	K20629|1.2132e-122|mze:101476214|K20629 active breakpoint cluster region-related protein | (RefSeq) active breakpoint cluster region-related protein-like	--	[T]	Signal transduction mechanisms	RhoGEF domain	Active breakpoint cluster region-related protein OS=Xenopus laevis OX=8355 GN=abr PE=2 SV=1	S	Function unknown	active breakpoint cluster region-related protein-like [Oncorhynchus mykiss]
gene4789	--	--	Molecular Function: phosphomevalonate kinase activity (GO:0004631);; Molecular Function: ATP binding (GO:0005524);; Cellular Component: peroxisome (GO:0005777);; Biological Process: cholesterol biosynthetic process (GO:0006695);; Biological Process: phosphorylation (GO:0016310);; Biological Process: isopentenyl diphosphate biosynthetic process, mevalonate pathway (GO:0019287);;	K13273|1.7484e-86|mze:101478107|K13273 phosphomevalonate kinase [EC:2.7.4.2] | (RefSeq) pmvk; phosphomevalonate kinase	Terpenoid backbone biosynthesis (ko00900);; Peroxisome (ko04146)	--	--	Phosphomevalonate kinase	--	I	Lipid transport and metabolism	phosphomevalonate kinase [Oncorhynchus mykiss]
gene8462	--	--	--	--	--	--	--	--	--	--	--	uncharacterized protein LOC110523673 [Oncorhynchus mykiss]
gene33175	[DZ]	Cell cycle control, cell division, chromosome partitioning;; Cytoskeleton	--	K11494|0|dre:336007|K11494 RCC1 and BTB domain-containing protein | (RefSeq) rcbtb1, fj43a07, wu:fj43a07, zgc:56037; regulator of chromosome condensation (RCC1) and BTB (POZ) domain containing protein 1	--	[S]	Function unknown	Regulator of chromosome condensation (RCC1) repeat;; Regulator of chromosome condensation (RCC1) repeat;; BTB/POZ domain;; BTB And C-terminal Kelch	Protein RCC2 homolog OS=Danio rerio OX=7955 GN=rcc2 PE=2 SV=1	DZ	Cell cycle control, cell division, chromosome partitioning;; Cytoskeleton	LOW QUALITY PROTEIN: RCC1 and BTB domain-containing protein 1-like [Oncorhynchus kisutch]
gene17219	[H]	Coenzyme transport and metabolism	--	K01251|0|mze:101485913|K01251 adenosylhomocysteinase [EC:3.3.1.1] | (RefSeq) ahcyl1; adenosylhomocysteinase like 1	Cysteine and methionine metabolism (ko00270)	[H]	Coenzyme transport and metabolism	S-adenosyl-L-homocysteine hydrolase, NAD binding domain;; S-adenosyl-L-homocysteine hydrolase;; D-isomer specific 2-hydroxyacid dehydrogenase, NAD binding domain;; Tetrahydrofolate dehydrogenase/cyclohydrolase, NAD(P)-binding domain	Adenosylhomocysteinase A OS=Xenopus laevis OX=8355 GN=ahcy-a PE=2 SV=1	H	Coenzyme transport and metabolism	PREDICTED: adenosylhomocysteinase 3 [Melopsittacus undulatus]
gene28447	--	--	Cellular Component: intracellular (GO:0005622);; Molecular Function: zinc ion binding (GO:0008270);;	--	--	[O]	Posttranslational modification, protein turnover, chaperones	SPRY-associated domain;; SPRY domain;; Zinc finger, C3HC4 type (RING finger);; zinc finger of C3HC4-type, RING;; Zinc finger, C3HC4 type (RING finger);; RING-type zinc-finger;; B-box zinc finger;; Zinc finger, C3HC4 type (RING finger)	Nuclear factor 7, ovary OS=Xenopus laevis OX=8355 PE=2 SV=1	S	Function unknown	zinc-binding protein A33-like [Oncorhynchus mykiss]
gene13736	--	--	--	K17602|7.55312e-112|xma:102219220|K17602 YLP motif-containing protein 1 | (RefSeq) ylpm1; YLP motif containing 1	--	[V]	Defense mechanisms	--	--	S	Function unknown	YLP motif-containing protein 1-like [Oncorhynchus mykiss]
gene29128	[G]	Carbohydrate transport and metabolism	Molecular Function: inward rectifier potassium channel activity (GO:0005242);; Cellular Component: integral component of membrane (GO:0016021);; Biological Process: regulation of ion transmembrane transport (GO:0034765);; Biological Process: potassium ion transmembrane transport (GO:0071805);;	K05005|0|mze:101476175|K05005 potassium inwardly-rectifying channel subfamily J member 12 | (RefSeq) ATP-sensitive inward rectifier potassium channel 12	--	[P]	Inorganic ion transport and metabolism	Inward rectifier potassium channel;; Inward rectifier potassium channel N-terminal	ATP-sensitive inward rectifier potassium channel 12 OS=Gallus gallus OX=9031 GN=KCNJ12 PE=1 SV=1	U	Intracellular trafficking, secretion, and vesicular transport	ATP-sensitive inward rectifier potassium channel 12-like [Oncorhynchus mykiss]
gene23611	[I]	Lipid transport and metabolism	Molecular Function: acyl-CoA dehydrogenase activity (GO:0003995);; Biological Process: oxidation-reduction process (GO:0055114);;	K00252|5.18106e-102|mze:101479842|K00252 glutaryl-CoA dehydrogenase [EC:1.3.8.6] | (RefSeq) glutaryl-CoA dehydrogenase, mitochondrial-like	Fatty acid degradation (ko00071);; Lysine degradation (ko00310);; Tryptophan metabolism (ko00380)	[E]	Amino acid transport and metabolism	Acyl-CoA dehydrogenase, C-terminal domain;; Acyl-CoA dehydrogenase, C-terminal domain	--	I	Lipid transport and metabolism	unnamed protein product, partial [Oncorhynchus mykiss]
Oncorhynchus_mykiss_newGene_63789	--	--	--	K12872|1.0875e-13|dre:406495|K12872 pre-mRNA-splicing factor RBM22/SLT11 | (RefSeq) rbm22, fb37a01, wu:fb37a01, wu:fc62e03, wu:fe05c04, zgc:77910; RNA binding motif protein 22	Spliceosome (ko03040)	[R]	General function prediction only	--	Pre-mRNA-splicing factor RBM22 OS=Danio rerio OX=7955 GN=rbm22 PE=2 SV=1	S	Function unknown	unnamed protein product, partial [Oncorhynchus mykiss]
gene49473	--	--	Molecular Function: nucleic acid binding (GO:0003676);; Molecular Function: metal ion binding (GO:0046872);;	--	--	--	--	--	--	--	--	zinc finger and SCAN domain-containing protein 22-like [Oncorhynchus mykiss]
gene55324	[K]	Transcription	Molecular Function: kinase activity (GO:0016301);; Biological Process: phosphorylation (GO:0016310);; Molecular Function: purine ribonucleoside binding (GO:0032550);; Molecular Function: purine ribonucleotide binding (GO:0032555);; Molecular Function: purine ribonucleoside triphosphate binding (GO:0035639);;	K08843|4.7573e-73|mze:101482977|K08843 leucine-rich repeat kinase 1 [EC:2.7.11.1] | (RefSeq) lrrk1; leucine rich repeat kinase 1	--	[R]	General function prediction only	Leucine rich repeat;; Leucine Rich repeats (2 copies)	Leucine-rich repeat-containing protein 69 OS=Xenopus laevis OX=8355 GN=lrrc69 PE=2 SV=1	S	Function unknown	leucine-rich repeat serine/threonine-protein kinase 1-like [Oncorhynchus mykiss]
gene7012	[ET]	Amino acid transport and metabolism;; Signal transduction mechanisms	--	K05202|0|ola:101173029|K05202 glutamate receptor, ionotropic kainate 2 | (RefSeq) glutamate receptor ionotropic, kainate 2	Neuroactive ligand-receptor interaction (ko04080)	[PET]	Inorganic ion transport and metabolism;; Amino acid transport and metabolism;; Signal transduction mechanisms	Ligand-gated ion channel;; Ligated ion channel L-glutamate- and glycine-binding site;; Receptor family ligand binding region;; Bacterial extracellular solute-binding proteins, family 3	Glutamate receptor ionotropic, kainate 2 (Fragment) OS=Xenopus laevis OX=8355 GN=grik2 PE=2 SV=1	U	Intracellular trafficking, secretion, and vesicular transport	glutamate receptor ionotropic, kainate 2-like, partial [Oncorhynchus mykiss]
gene34620	[R]	General function prediction only	--	--	--	[R]	General function prediction only	Zinc finger, C2H2 type;; Zinc-finger double domain;; C2H2-type zinc finger;; Zinc-finger double-stranded RNA-binding	Gastrula zinc finger protein XlCGF7.1 (Fragment) OS=Xenopus laevis OX=8355 PE=3 SV=1	S	Function unknown	zinc finger protein 629-like isoform X1 [Oncorhynchus mykiss]
gene26952	--	--	Cellular Component: integral component of membrane (GO:0016021);;	--	--	--	--	BRICHOS domain	Leukocyte cell-derived chemotaxin 1 OS=Gallus gallus OX=9031 GN=CNMD PE=2 SV=1	S	Function unknown	tenomodulin-like [Oncorhynchus mykiss]
gene37285	--	--	--	--	--	--	--	Immunoglobulin domain	--	S	Function unknown	uncharacterized protein LOC110500086 [Oncorhynchus mykiss]
gene44335	--	--	--	--	--	[R]	General function prediction only	Galactose oxidase, central domain;; Galactose oxidase, central domain;; Kelch motif;; Kelch motif;; Kelch motif;; Kelch motif	Rab9 effector protein with kelch motifs OS=Gallus gallus OX=9031 GN=RABEPK PE=2 SV=1	S	Function unknown	kelch domain-containing protein 1-like [Oncorhynchus mykiss]
gene26485	[BQ]	Chromatin structure and dynamics;; Secondary metabolites biosynthesis, transport and catabolism	Biological Process: angiogenesis (GO:0001525);; Biological Process: liver development (GO:0001889);; Molecular Function: transcription corepressor activity (GO:0003714);; Cellular Component: nucleus (GO:0005634);; Biological Process: regulation of transcription, DNA-templated (GO:0006355);; Biological Process: dorsal/ventral pattern formation (GO:0009953);; Molecular Function: NAD-dependent histo…	K11404|0|mze:101482849|K11404 histone deacetylase 3 [EC:3.5.1.98] | (RefSeq) hdac3; histone deacetylase 3	--	[B]	Chromatin structure and dynamics	Histone deacetylase domain	Histone deacetylase 3 OS=Tetraodon nigroviridis OX=99883 GN=hdac3 PE=3 SV=1	BQ	Chromatin structure and dynamics;; Secondary metabolites biosynthesis, transport and catabolism	PREDICTED: histone deacetylase 3 [Salmo salar]
gene42761	--	--	Molecular Function: G-protein coupled receptor activity (GO:0004930);; Biological Process: cell surface receptor signaling pathway (GO:0007166);; Biological Process: G-protein coupled receptor signaling pathway (GO:0007186);; Cellular Component: integral component of membrane (GO:0016021);;	--	--	[T]	Signal transduction mechanisms	7 transmembrane receptor (Secretin family);; GPCR proteolysis site, GPS, motif	Adhesion G-protein coupled receptor G6 OS=Danio rerio OX=7955 GN=adgrg6 PE=1 SV=1	S	Function unknown	adhesion G-protein coupled receptor G5-like [Oncorhynchus mykiss]
gene43190	--	--	Molecular Function: transcription corepressor activity (GO:0003714);; Cellular Component: cytoplasm (GO:0005737);; Cellular Component: COP9 signalosome (GO:0008180);; Biological Process: protein deneddylation (GO:0010388);; Biological Process: neurogenesis (GO:0022008);; Biological Process: negative regulation of transcription, DNA-templated (GO:0045892);;	K12176|0|xma:102232280|K12176 COP9 signalosome complex subunit 2 | (RefSeq) cops2; COP9 signalosome subunit 2	--	[OT]	Posttranslational modification, protein turnover, chaperones;; Signal transduction mechanisms	PCI domain	COP9 signalosome complex subunit 2 OS=Danio rerio OX=7955 GN=cops2 PE=2 SV=1	O	Posttranslational modification, protein turnover, chaperones	COP9 signalosome complex subunit 2-like [Oncorhynchus mykiss]
gene41403	--	--	Cellular Component: integral component of membrane (GO:0016021);;	K06571|7.96351e-137|mze:101471933|K06571 tetraspanin-7 | (RefSeq) tspan6; tetraspanin 6	--	[R]	General function prediction only	Tetraspanin family	Tetraspanin-36 OS=Danio rerio OX=7955 GN=tspan36 PE=1 SV=2	S	Function unknown	tetraspanin-7-like [Oncorhynchus mykiss]
gene34717	--	--	--	--	--	[T]	Signal transduction mechanisms	RhoGAP domain	SLIT-ROBO Rho GTPase-activating protein 2 OS=Danio rerio OX=7955 GN=srgap2 PE=2 SV=1	S	Function unknown	protein FAM13A-like [Oncorhynchus mykiss]
gene10499	[J]	Translation, ribosomal structure and biogenesis	Molecular Function: nucleotide binding (GO:0000166);; Molecular Function: nucleic acid binding (GO:0003676);; Biological Process: RNA processing (GO:0006396);;	--	--	[A]	RNA processing and modification	RNA recognition motif. (a.k.a. RRM, RBD, or RNP domain);; LSM-interacting associated unstructured	Squamous cell carcinoma antigen recognized by T-cells 3 OS=Danio rerio OX=7955 GN=sart3 PE=2 SV=1	S	Function unknown	squamous cell carcinoma antigen recognized by T-cells 3-like isoform X1 [Oncorhynchus mykiss]
gene31119	--	--	--	K10352|0|dre:555454|K10352 myosin heavy chain | (RefSeq) myh10, dZ204D19.2, si:dz150i12.3, wu:fc46h07, wu:fy19d11; myosin, heavy chain 10, non-muscle	Tight junction (ko04530)	[Z]	Cytoskeleton	Myosin tail;; Myosin head (motor domain);; Myosin N-terminal SH3-like domain;; IQ calmodulin-binding motif	Myosin-9 OS=Gallus gallus OX=9031 GN=MYH9 PE=2 SV=1	Z	Cytoskeleton	myosin-10-like [Oncorhynchus mykiss]
gene7703	[KB]	Transcription;; Chromatin structure and dynamics	Molecular Function: histone acetyltransferase activity (GO:0004402);; Cellular Component: cytoplasm (GO:0005737);; Biological Process: regulation of transcription from RNA polymerase II promoter (GO:0006357);; Biological Process: axonogenesis (GO:0007409);; Cellular Component: transcription elongation factor complex (GO:0008023);; Molecular Function: phosphorylase kinase regulator activity (GO:00…	K07739|1.63185e-180|dre:541509|K07739 elongator complex protein 3 [EC:2.3.1.48] | (RefSeq) elp3, si:ch211-63o20.8, zgc:113140; elongator acetyltransferase complex subunit 3	--	[BK]	Chromatin structure and dynamics;; Transcription	Radical SAM superfamily	Elongator complex protein 3 OS=Danio rerio OX=7955 GN=elp3 PE=2 SV=3	BK	Chromatin structure and dynamics;; Transcription	elongator complex protein 3 [Oncorhynchus mykiss]
gene11615	[J]	Translation, ribosomal structure and biogenesis	Biological Process: ribosomal small subunit assembly (GO:0000028);; Molecular Function: structural constituent of ribosome (GO:0003735);; Biological Process: translation (GO:0006412);; Molecular Function: hydrolase activity (GO:0016787);; Cellular Component: cytosolic small ribosomal subunit (GO:0022627);;	K02962|7.64752e-67|tru:101062318|K02962 small subunit ribosomal protein S17e | (RefSeq) rps17; ribosomal protein S17	Ribosome (ko03010)	[J]	Translation, ribosomal structure and biogenesis	Ribosomal S17	40S ribosomal protein S17 OS=Ictalurus punctatus OX=7998 GN=rps17 PE=2 SV=3	J	Translation, ribosomal structure and biogenesis	hypothetical protein cypCar_00047144 [Cyprinus carpio]
gene35785	--	--	--	K19467|3.08513e-131|tru:101066369|K19467 matrilin-3 | (RefSeq) matrilin-3-like	--	[T]	Signal transduction mechanisms	von Willebrand factor type A domain;; von Willebrand factor type A domain;; Trimeric coiled-coil oligomerisation domain of matrilin	Matrilin-3 OS=Gallus gallus OX=9031 GN=MATN3 PE=2 SV=1	S	Function unknown	matrilin-3-like isoform X1 [Oncorhynchus mykiss]
gene34473	--	--	--	--	--	[S]	Function unknown	NACHT domain;; Caspase recruitment domain;; Type VI secretion, EvfE, EvfF, ImpA, BimE, VC_A0119, VasJ;; Fimbrial assembly protein (PilN);; ATPase family associated with various cellular activities (AAA);; Leucine Rich repeat	--	S	Function unknown	uncharacterized protein LOC110498591 [Oncorhynchus mykiss]
gene45498	--	--	Molecular Function: RNA binding (GO:0003723);;	K13210|4.36373e-157|mze:101477291|K13210 far upstream element-binding protein | (RefSeq) fubp1; far upstream element binding protein 1	--	[A]	RNA processing and modification	KH domain;; Domain of unknown function (DUF1897);; KH domain;; KH domain;; KH domain	Far upstream element-binding protein 2 OS=Gallus gallus OX=9031 GN=KHSRP PE=1 SV=1	S	Function unknown	far upstream element-binding protein 1 [Oncorhynchus mykiss]
gene44705	--	--	Molecular Function: nucleic acid binding (GO:0003676);; Molecular Function: metal ion binding (GO:0046872);;	--	--	[R]	General function prediction only	TERF1-interacting nuclear factor 2 N-terminus;; Zinc finger, C2H2 type;; C2H2-type zinc finger;; Zinc-finger double domain;; Zinc-finger of C2H2 type;; Zinc-finger double-stranded RNA-binding	Zinc finger and BTB domain-containing protein 17 (Fragment) OS=Gallus gallus OX=9031 GN=ZBTB17 PE=2 SV=1	K	Transcription	uncharacterized protein LOC110508459 isoform X1 [Oncorhynchus mykiss]
gene31477	--	--	--	--	--	[R]	General function prediction only	Reverse transcriptase (RNA-dependent DNA polymerase);; Retroviral aspartyl protease	--	L	Replication, recombination and repair	uncharacterized protein K02A2.6-like [Oncorhynchus mykiss]
gene2833	--	--	Molecular Function: nucleic acid binding (GO:0003676);; Molecular Function: exonuclease activity (GO:0004527);; Biological Process: nucleic acid phosphodiester bond hydrolysis (GO:0090305);;	K18340|3.36709e-131|mze:101487596|K18340 apoptosis-enhancing nuclease [EC:3.1.-.-] | (RefSeq) apoptosis-enhancing nuclease-like	--	[L]	Replication, recombination and repair	Exonuclease	RNA exonuclease 4 OS=Xenopus laevis OX=8355 GN=rexo4 PE=2 SV=2	L	Replication, recombination and repair	apoptosis-enhancing nuclease-like [Oncorhynchus mykiss]
gene26068	--	--	Molecular Function: DNA binding (GO:0003677);; Cellular Component: nucleus (GO:0005634);;	--	--	--	--	Homeobox domain;; Homeodomain leucine-zipper encoding, Homez;; Homeobox KN domain	--	K	Transcription	zinc fingers and homeoboxes protein 1-like [Oncorhynchus mykiss]
gene10441	--	--	Molecular Function: ubiquitin-protein transferase activity (GO:0004842);; Biological Process: protein ubiquitination (GO:0016567);; Molecular Function: ligase activity (GO:0016874);;	K17849|0|mze:101478168|K17849 E3 ubiquitin-protein ligase HECTD4 [EC:2.3.2.26] | (RefSeq) hectd4; HECT domain E3 ubiquitin protein ligase 4	--	--	--	HECT-domain (ubiquitin-transferase)	E3 ubiquitin-protein ligase HACE1 OS=Gallus gallus OX=9031 GN=HACE1 PE=2 SV=1	O	Posttranslational modification, protein turnover, chaperones	probable E3 ubiquitin-protein ligase HECTD4 [Oncorhynchus mykiss]
gene16345	--	--	Cellular Component: Golgi membrane (GO:0000139);; Biological Process: protein glycosylation (GO:0006486);; Molecular Function: galactosyltransferase activity (GO:0008378);; Cellular Component: integral component of membrane (GO:0016021);;	K00715|8.92016e-179|mze:101480560|K00715 ganglioside galactosyltransferase [EC:2.4.1.62] | (RefSeq) b3galt4; beta-1,3-galactosyltransferase 4	Other types of O-glycan biosynthesis (ko00514);; Glycosphingolipid biosynthesis - ganglio series (ko00604)	[G]	Carbohydrate transport and metabolism	Galactosyltransferase	Lactosylceramide 1,3-N-acetyl-beta-D-glucosaminyltransferase OS=Xenopus tropicalis OX=8364 GN=b3gnt5 PE=2 SV=1	S	Function unknown	putative UDP-GlcNAc:betaGal beta-1,3-N-acetylglucosaminyltransferase LOC100288842 [Oncorhynchus mykiss]
gene43680	--	--	Biological Process: cell surface receptor signaling pathway (GO:0007166);; Cellular Component: integral component of membrane (GO:0016021);; Molecular Function: gastric inhibitory peptide receptor activity (GO:0016519);; Biological Process: gastric inhibitory peptide signaling pathway (GO:0038192);;	K04580|0|dre:101885360|K04580 gastric inhibitory polypeptide receptor | (RefSeq) gipr, si:ch211-188j1.2; gastric inhibitory polypeptide receptor	Neuroactive ligand-receptor interaction (ko04080)	[T]	Signal transduction mechanisms	7 transmembrane receptor (Secretin family);; Hormone receptor domain;; Ocular albinism type 1 protein	Vasoactive intestinal polypeptide receptor OS=Meleagris gallopavo OX=9103 GN=VIPR1 PE=2 SV=2	U	Intracellular trafficking, secretion, and vesicular transport	glucagon receptor-like [Oncorhynchus mykiss]
gene32010	[K]	Transcription	Molecular Function: ATP binding (GO:0005524);; Cellular Component: nucleus (GO:0005634);; Biological Process: DNA repair (GO:0006281);; Biological Process: DNA recombination (GO:0006310);; Biological Process: regulation of transcription, DNA-templated (GO:0006355);; Biological Process: DNA duplex unwinding (GO:0032508);; Molecular Function: ATP-dependent 5'-3' DNA helicase activity (GO:0043141);;…	K04499|0|mze:101471243|K04499 RuvB-like protein 1 (pontin 52) | (RefSeq) ruvbl1; RuvB like AAA ATPase 1	Wnt signaling pathway (ko04310)	[L]	Replication, recombination and repair	TIP49 C-terminus;; Holliday junction DNA helicase ruvB N-terminus;; ATPase family associated with various cellular activities (AAA);; AAA domain;; AAA domain (dynein-related subfamily);; Sigma-54 interaction domain	RuvB-like 1 OS=Danio rerio OX=7955 GN=ruvbl1 PE=2 SV=1	K	Transcription	ruvB-like 1 [Oncorhynchus mykiss]
gene1667	--	--	Biological Process: determination of left/right symmetry (GO:0007368);; Biological Process: system development (GO:0048731);;	K09220|8.03239e-124|lcm:102367145|K09220 IKAROS family zinc finger protein | (RefSeq) IKZF5; IKAROS family zinc finger 5	--	[R]	General function prediction only	C2H2-type zinc-finger domain;; Zinc-finger double domain	Zinc finger protein Pegasus OS=Gallus gallus OX=9031 GN=IKZF5 PE=2 SV=1	S	Function unknown	zinc finger protein Pegasus-like, partial [Oncorhynchus mykiss]
gene7204	--	--	Cellular Component: ubiquitin ligase complex (GO:0000151);; Biological Process: protein polyubiquitination (GO:0000209);; Cellular Component: cytoplasm (GO:0005737);; Cellular Component: integral component of membrane (GO:0016021);; Molecular Function: ubiquitin conjugating enzyme binding (GO:0031624);; Biological Process: positive regulation of proteasomal ubiquitin-dependent protein catabolic p…	K11977|8.27895e-165|dre:567287|K11977 E3 ubiquitin-protein ligase RNF217 [EC:2.3.2.27] | (RefSeq) rnf217, si:ch211-208c9.4, zgc:174567; ring finger protein 217	--	[O]	Posttranslational modification, protein turnover, chaperones	IBR domain, a half RING-finger domain	Probable E3 ubiquitin-protein ligase RNF217 OS=Xenopus laevis OX=8355 GN=rnf217 PE=2 SV=1	O	Posttranslational modification, protein turnover, chaperones	probable E3 ubiquitin-protein ligase RNF217 [Oncorhynchus mykiss]
gene16730	[P]	Inorganic ion transport and metabolism	Molecular Function: calcium-transporting ATPase activity (GO:0005388);; Molecular Function: ATP binding (GO:0005524);; Cellular Component: integral component of membrane (GO:0016021);; Molecular Function: metal ion binding (GO:0046872);; Biological Process: calcium ion transmembrane transport (GO:0070588);;	K05850|0|pbi:103061711|K05850 Ca2+ transporting ATPase, plasma membrane [EC:3.6.3.8] | (RefSeq) ATP2B3; ATPase plasma membrane Ca2+ transporting 3	Calcium signaling pathway (ko04020);; Adrenergic signaling in cardiomyocytes (ko04261)	[P]	Inorganic ion transport and metabolism	Cation transporting ATPase, C-terminus;; E1-E2 ATPase;; Plasma membrane calcium transporter ATPase C terminal;; Cation transport ATPase (P-type);; haloacid dehalogenase-like hydrolase;; Cation transporter/ATPase, N-terminus;; haloacid dehalogenase-like hydrolase	Plasma membrane calcium-transporting ATPase 2 (Fragment) OS=Oreochromis mossambicus OX=8127 GN=atp2b2 PE=2 SV=1	P	Inorganic ion transport and metabolism	plasma membrane calcium-transporting ATPase 3-like isoform X1 [Oncorhynchus mykiss]
gene53997	--	--	Cellular Component: integral component of membrane (GO:0016021);;	--	--	[T]	Signal transduction mechanisms	Inhibitor of apoptosis-promoting Bax1	--	S	Function unknown	protein lifeguard 1-like, partial [Oncorhynchus mykiss]
Oncorhynchus_mykiss_newGene_33498	--	--	Cellular Component: integral component of membrane (GO:0016021);;	K06249|2.99391e-23|tru:101074793|K06249 reelin [EC:3.4.21.-] | (RefSeq) reln; reelin	Focal adhesion (ko04510);; ECM-receptor interaction (ko04512)	--	--	--	--	O	Posttranslational modification, protein turnover, chaperones	unnamed protein product [Oncorhynchus mykiss]
gene37834	--	--	Molecular Function: structural molecule activity (GO:0005198);; Cellular Component: plasma membrane (GO:0005886);; Cellular Component: bicellular tight junction (GO:0005923);; Cellular Component: integral component of membrane (GO:0016021);;	K06087|6.69461e-122|mze:101477346|K06087 claudin | (RefSeq) claudin-7-A	Cell adhesion molecules (CAMs) (ko04514);; Tight junction (ko04530)	--	--	PMP-22/EMP/MP20/Claudin family;; PMP-22/EMP/MP20/Claudin tight junction	Claudin-7-A OS=Danio rerio OX=7955 GN=cldn7a PE=2 SV=1	U	Intracellular trafficking, secretion, and vesicular transport	PREDICTED: claudin-7-A [Salmo salar]
gene30220	--	--	Molecular Function: sulfotransferase activity (GO:0008146);;	K01025|7.92047e-140|mze:106676355|K01025 [EC:2.8.2.-] | (RefSeq) cytosolic sulfotransferase 3-like	--	[R]	General function prediction only	Sulfotransferase domain;; Sulfotransferase family	Cytosolic sulfotransferase 3 OS=Danio rerio OX=7955 GN=sult1st3 PE=1 SV=1	S	Function unknown	cytosolic sulfotransferase 2-like isoform X1 [Oncorhynchus mykiss]
gene2885	[T]	Signal transduction mechanisms	Molecular Function: protein tyrosine phosphatase activity (GO:0004725);; Biological Process: peptidyl-tyrosine dephosphorylation (GO:0035335);;	K18018|0|mze:101473792|K18018 tyrosine-protein phosphatase non-receptor type 5 [EC:3.1.3.48] | (RefSeq) ptpn5; protein tyrosine phosphatase, non-receptor type 5	MAPK signaling pathway (ko04010)	[T]	Signal transduction mechanisms	Protein-tyrosine phosphatase;; Dual specificity phosphatase, catalytic domain	Receptor-type tyrosine-protein phosphatase S OS=Gallus gallus OX=9031 GN=PTPRS PE=1 SV=3	T	Signal transduction mechanisms	tyrosine-protein phosphatase non-receptor type 5-like [Oncorhynchus mykiss]
gene13985	--		Molecular Function: ephrin receptor activity (GO:0005003);; Molecular Function: ATP binding (GO:0005524);; Cellular Component: integral component of membrane (GO:0016021);; Biological Process: peptidyl-tyrosine phosphorylation (GO:0018108);; Biological Process: ephrin receptor signaling pathway (GO:0048013);;	K05108|0|xma:102230332|K05108 EphA7 [EC:2.7.10.1] | (RefSeq) ephrin type-A receptor 7	--	[T]	Signal transduction mechanisms	Protein tyrosine kinase;; Protein kinase domain;; SAM domain (Sterile alpha motif);; SAM domain (Sterile alpha motif);; Ephrin type-A receptor 2 transmembrane domain;; Fibronectin type III domain;; Ephrin receptor ligand binding domain;; Fibronectin type III domain;; Putative ephrin-receptor like	Ephrin type-A receptor 7 OS=Gallus gallus OX=9031 GN=EPHA7 PE=2 SV=1	T	Signal transduction mechanisms	ephrin type-A receptor 7-like [Oncorhynchus mykiss]
gene7764	--	--	Molecular Function: GTPase activity (GO:0003924);; Molecular Function: GTP binding (GO:0005525);;	K14416|1.9678e-13|mze:101485227|K14416 elongation factor 1 alpha-like protein | (RefSeq) hbs1l; HBS1 like translational GTPase	mRNA surveillance pathway (ko03015)	--	--	HBS1 N-terminus	--	J	Translation, ribosomal structure and biogenesis	uncharacterized protein LOC110522675 [Oncorhynchus mykiss]
gene13539	[IQR]	Lipid transport and metabolism;; Secondary metabolites biosynthesis, transport and catabolism;; General function prediction only	Biological Process: eye development (GO:0001654);; Cellular Component: membrane (GO:0016020);; Biological Process: single-organism metabolic process (GO:0044710);; Biological Process: single-organism cellular process (GO:0044763);;	K00061|1.12544e-151|mze:101481430|K00061 11-cis-retinol dehydrogenase [EC:1.1.1.315] | (RefSeq) rdh5; retinol dehydrogenase 5	Retinol metabolism (ko00830)	[QR]	Secondary metabolites biosynthesis, transport and catabolism;; General function prediction only	short chain dehydrogenase;; Enoyl-(Acyl carrier protein) reductase	D-beta-hydroxybutyrate dehydrogenase, mitochondrial OS=Gallus gallus OX=9031 GN=BDH1 PE=2 SV=1	S	Function unknown	retinol dehydrogenase 7-like [Oncorhynchus mykiss]
gene19234	--	--	--	--	--	[K]	Transcription	mbt repeat;; SAM domain (Sterile alpha motif);; Zinc finger, C2HC type;; SAM domain (Sterile alpha motif)	Lethal(3)malignant brain tumor-like protein 1 OS=Gallus gallus OX=9031 GN=L3MBTL1 PE=3 SV=1	S	Function unknown	lethal(3)malignant brain tumor-like protein 4 [Oncorhynchus mykiss]
gene37210	--	--	Biological Process: apoptotic process (GO:0006915);;	--	--	--	--	--	--	K	Transcription	PRKC apoptosis WT1 regulator protein-like isoform X1 [Oncorhynchus mykiss]
gene34774	[R]	General function prediction only	--	K10260|0|xma:102234382|K10260 F-box and WD-40 domain protein 7 | (RefSeq) fbxw7; F-box and WD repeat domain containing 7	Ubiquitin mediated proteolysis (ko04120)	[R]	General function prediction only	WD domain, G-beta repeat;; Nucleoporin Nup120/160;; Anaphase-promoting complex subunit 4 WD40 domain;; F-box-like;; F-box domain;; Cytolethal distending toxin A/C domain	Beta-TrCP OS=Xenopus laevis OX=8355 GN=fbxw1 PE=1 SV=1	S	Function unknown	F-box/WD repeat-containing protein 7-like [Oncorhynchus mykiss]
gene14779	--	--	Cellular Component: nucleus (GO:0005634);; Biological Process: regulation of transcription, DNA-templated (GO:0006355);; Molecular Function: zinc ion binding (GO:0008270);; Molecular Function: sequence-specific DNA binding (GO:0043565);;	K09375|1.48682e-168|dre:378959|K09375 LIM homeobox protein 6/8 | (RefSeq) lhx8a, cb875, fk78g12, lhx7, lhx8, wu:fk78g12; LIM homeobox 8a	--	[R]	General function prediction only	LIM domain;; Homeobox domain;; Homeobox KN domain	LIM/homeobox protein Lhx9 OS=Astyanax fasciatus OX=223369 GN=lhx9 PE=2 SV=1	K	Transcription	LIM/homeobox protein Lhx8-like isoform X1 [Oncorhynchus mykiss]
gene9894	--	--	--	--	--	--	--	Fibronectin type III domain	Snaclec 6 OS=Bitis arietans OX=8692 PE=2 SV=1	S	Function unknown	uncharacterized protein LOC110525176 isoform X1 [Oncorhynchus mykiss]
gene12574	[O]	Posttranslational modification, protein turnover, chaperones	Cellular Component: cell (GO:0005623);; Cellular Component: integral component of membrane (GO:0016021);; Biological Process: cell redox homeostasis (GO:0045454);;	K09536|0|xma:102217836|K09536 DnaJ homolog subfamily C member 16 | (RefSeq) dnaJ homolog subfamily C member 16-like	--	--	--	DnaJ domain;; Thioredoxin	DnaJ homolog subfamily C member 16 OS=Gallus gallus OX=9031 GN=DNAJC16 PE=2 SV=1	O	Posttranslational modification, protein turnover, chaperones	dnaJ homolog subfamily C member 16-like [Oncorhynchus mykiss]
gene54327	[F]	Nucleotide transport and metabolism	Molecular Function: hydrolase activity (GO:0016787);;	K03574|6.17854e-70|tru:101076956|K03574 8-oxo-dGTP diphosphatase [EC:3.6.1.55] | (RefSeq) nudt15; nudix hydrolase 15	--	--	--	NUDIX domain	--	F	Nucleotide transport and metabolism	nucleotide triphosphate diphosphatase NUDT15-like [Oncorhynchus mykiss]
gene10706	--	--	Molecular Function: chaperone binding (GO:0051087);;	K09558|1.43064e-101|xma:102234123|K09558 BCL2-associated athanogene 4 | (RefSeq) bag4; BCL2 associated athanogene 4	--	[T]	Signal transduction mechanisms	BAG domain	--	O	Posttranslational modification, protein turnover, chaperones	BAG family molecular chaperone regulator 4-like [Oncorhynchus mykiss]
gene34002	--	--	--	K20306|0|dre:100002630|K20306 trafficking protein particle complex subunit 9 | (RefSeq) si:dkey-218f9.10	--	[U]	Intracellular trafficking, secretion, and vesicular transport	Transport protein Trs120 or TRAPPC9, TRAPP II complex subunit	Trafficking protein particle complex subunit 9 OS=Xenopus laevis OX=8355 GN=trappc9 PE=2 SV=1	S	Function unknown	trafficking protein particle complex subunit 9-like [Oncorhynchus mykiss]
gene44399	--	--	Cellular Component: integral component of membrane (GO:0016021);; Biological Process: G-protein coupled purinergic nucleotide receptor signaling pathway (GO:0035589);; Molecular Function: G-protein coupled purinergic nucleotide receptor activity (GO:0045028);;	K08388|1.85841e-123|mze:101468042|K08388 purinergic receptor P2Y, G protein-coupled, 13 | (RefSeq) P2Y purinoceptor 13-like	Neuroactive ligand-receptor interaction (ko04080)	--	--	7 transmembrane receptor (rhodopsin family)	G-protein coupled receptor 183-A OS=Danio rerio OX=7955 GN=gpr183a PE=2 SV=1	U	Intracellular trafficking, secretion, and vesicular transport	P2Y purinoceptor 13-like isoform X1 [Oncorhynchus mykiss]
Oncorhynchus_mykiss_newGene_7275	--	--	Molecular Function: ligase activity (GO:0016874);;	K12168|1.55426e-24|dre:100331355|K12168 E3 ubiquitin-protein ligase HECW2 [EC:2.3.2.26] | (RefSeq) hecw2b, hecw2; HECT, C2 and WW domain containing E3 ubiquitin protein ligase 2b	--	[O]	Posttranslational modification, protein turnover, chaperones	--	--	O	Posttranslational modification, protein turnover, chaperones	PREDICTED: E3 ubiquitin-protein ligase HECW2-like, partial [Salmo salar]
gene37873	[C]	Energy production and conversion	Molecular Function: oxidoreductase activity, acting on NAD(P)H (GO:0016651);; Molecular Function: quinone binding (GO:0048038);; Molecular Function: NAD binding (GO:0051287);; Biological Process: oxidation-reduction process (GO:0055114);;	K03935|0|mze:101467150|K03935 NADH dehydrogenase (ubiquinone) Fe-S protein 2 [EC:1.6.5.3 1.6.99.3] | (RefSeq) ndufs2; NADH:ubiquinone oxidoreductase core subunit S2	Oxidative phosphorylation (ko00190)	[C]	Energy production and conversion	Respiratory-chain NADH dehydrogenase, 49 Kd subunit	--	C	Energy production and conversion	PREDICTED: NADH dehydrogenase [ubiquinone] iron-sulfur protein 2, mitochondrial [Salmo salar]
gene45633	[R]	General function prediction only	Molecular Function: protein kinase activity (GO:0004672);; Molecular Function: ATP binding (GO:0005524);; Biological Process: protein phosphorylation (GO:0006468);; Molecular Function: zinc ion binding (GO:0008270);;	K04416|0|dre:100334486|K04416 mitogen-activated protein kinase kinase kinase 1 [EC:2.7.11.25] | (RefSeq) map3k1, si:rp71-80a19.2; mitogen-activated protein kinase kinase kinase 1, E3 ubiquitin protein ligase	MAPK signaling pathway (ko04010);; Ubiquitin mediated proteolysis (ko04120);; RIG-I-like receptor signaling pathway (ko04622);; GnRH signaling pathway (ko04912)	--	--	Protein kinase domain;; Protein tyrosine kinase;; Kinase-like;; SWIM zinc finger	Serine/threonine-protein kinase PAK 3 OS=Xenopus laevis OX=8355 GN=pak3 PE=2 SV=1	T	Signal transduction mechanisms	mitogen-activated protein kinase kinase kinase 1-like [Oncorhynchus mykiss]
Oncorhynchus_mykiss_newGene_22600	--	--	Molecular Function: nucleic acid binding (GO:0003676);; Cellular Component: nucleus (GO:0005634);; Molecular Function: zinc ion binding (GO:0008270);; Biological Process: RNA splicing (GO:0008380);;	--	--	--	--	--	--	S	Function unknown	zinc finger protein 638-like [Oncorhynchus mykiss]
gene46774	--	--	Molecular Function: protein binding (GO:0005515);;	K17567|9.55592e-31|dre:100144401|K17567 protein phosphatase 1 regulatory subunit 28 | (RefSeq) elfn1b, elfn1, sc:d0369; extracellular leucine-rich repeat and fibronectin type III domain containing 1b	--	--	--	--	--	S	Function unknown	protein ELFN1-like, partial [Oncorhynchus mykiss]
Oncorhynchus_mykiss_newGene_26643	--	--	--	--	--	[TV]	Signal transduction mechanisms;; Defense mechanisms	Lectin C-type domain	--	S	Function unknown	unnamed protein product, partial [Oncorhynchus mykiss]
gene19166	--	--	--	--	--	--	--	Immunoglobulin I-set domain;; Immunoglobulin domain;; Immunoglobulin domain;; Immunoglobulin V-set domain	V-set and transmembrane domain-containing protein 2B OS=Xenopus tropicalis OX=8364 GN=vstm2b PE=2 SV=1	S	Function unknown	V-set and transmembrane domain-containing protein 2A-like [Oncorhynchus mykiss]
gene29333	[R]	General function prediction only	--	--	--	--	--	GH3 auxin-responsive promoter	--	S	Function unknown	GH3 domain-containing protein isoform X1 [Oncorhynchus kisutch]
gene42149	--	--	--	K20721|0|mze:101487500|K20721 reticulon-1 | (RefSeq) rtn1; reticulon 1	--	[U]	Intracellular trafficking, secretion, and vesicular transport	Reticulon	Reticulon-1-A OS=Xenopus laevis OX=8355 GN=rtn1-a PE=2 SV=1	U	Intracellular trafficking, secretion, and vesicular transport	reticulon-1-like isoform X1 [Oncorhynchus mykiss]
gene14029	--	--	Cellular Component: extracellular region (GO:0005576);; Biological Process: multicellular organism development (GO:0007275);;	--	--	--	--	Leg1	Protein LEG1 homolog OS=Oncorhynchus mykiss OX=8022 GN=leg1 PE=2 SV=1	S	Function unknown	protein LEG1 homolog [Oncorhynchus mykiss]
Oncorhynchus_mykiss_newGene_40620	--	--	Molecular Function: DNA binding (GO:0003677);; Biological Process: transposition, DNA-mediated (GO:0006313);; Biological Process: signal transduction (GO:0007165);; Biological Process: DNA integration (GO:0015074);;	--	--	--	--	Homeodomain-like domain	--	--	--	unnamed protein product, partial [Oncorhynchus mykiss]
gene25898	[T]	Signal transduction mechanisms	Molecular Function: DNA binding (GO:0003677);; Molecular Function: protein serine/threonine kinase activity (GO:0004674);; Molecular Function: ATP binding (GO:0005524);; Cellular Component: nucleus (GO:0005634);; Biological Process: regulation of transcription, DNA-templated (GO:0006355);; Biological Process: protein phosphorylation (GO:0006468);;	K17539|0|mze:101472671|K17539 serine/threonine-protein kinase PDIK1L [EC:2.7.11.1] | (RefSeq) pdik1l; PDLIM1 interacting kinase 1 like	--	[OUT]	Posttranslational modification, protein turnover, chaperones;; Intracellular trafficking, secretion, and vesicular transport;; Signal transduction mechanisms	Protein kinase domain;; Protein tyrosine kinase	Serine/threonine-protein kinase pdik1l OS=Danio rerio OX=7955 GN=pdik1l PE=2 SV=1	T	Signal transduction mechanisms	unnamed protein product [Oncorhynchus mykiss]
gene19465	--	--	Cellular Component: integral component of membrane (GO:0016021);;	K06567|1.14778e-95|xma:102238196|K06567 CD226 antigen | (RefSeq) cd226; CD226 molecule	Cell adhesion molecules (CAMs) (ko04514)	--	--	Immunoglobulin V-set domain;; Immunoglobulin domain;; Immunoglobulin domain;; Immunoglobulin I-set domain;; Izumo-like Immunoglobulin domain	Nectin-3-like protein OS=Danio rerio OX=7955 GN=nectin3 PE=2 SV=2	U	Intracellular trafficking, secretion, and vesicular transport	CD226 antigen isoform X1 [Oncorhynchus mykiss]
gene4946	--	--	--	--	--	--	--	ApoM domain	--	O	Posttranslational modification, protein turnover, chaperones	apolipoprotein M [Oncorhynchus mykiss]
gene6928	[O]	Posttranslational modification, protein turnover, chaperones	Molecular Function: ATP binding (GO:0005524);; Biological Process: cellular response to interferon-gamma (GO:0071346);;	K06027|0|mze:101477540|K06027 vesicle-fusing ATPase [EC:3.6.4.6] | (RefSeq) vesicle-fusing ATPase	--	[O]	Posttranslational modification, protein turnover, chaperones	ATPase family associated with various cellular activities (AAA);; Cell division protein 48 (CDC48), N-terminal domain;; Cell division protein 48 (CDC48), domain 2;; AAA domain;; RNA helicase;; AAA domain (Cdc48 subfamily);; AAA domain (dynein-related subfamily);; TIP49 C-terminus;; Holliday junction DNA helicase ruvB N-terminus;; Magnesium chelatase, subunit ChlI	Transitional endoplasmic reticulum ATPase OS=Danio rerio OX=7955 GN=vcp PE=1 SV=1	O	Posttranslational modification, protein turnover, chaperones	vesicle-fusing ATPase-like isoform X2 [Oncorhynchus mykiss]
gene981	--	--	Molecular Function: DNA binding (GO:0003677);; Cellular Component: integral component of membrane (GO:0016021);;	--	--	--	--	Thymopoietin protein;; LEM domain	--	S	Function unknown	lamina-associated polypeptide 2-like [Oncorhynchus mykiss]
gene17198	--	--	Molecular Function: peptide-O-fucosyltransferase activity (GO:0046922);;	K03691|0|dre:403029|K03691 peptide-O-fucosyltransferase [EC:2.4.1.221] | (RefSeq) pofut1, fut12, zgc:110472; protein O-fucosyltransferase 1	Other types of O-glycan biosynthesis (ko00514)	[O]	Posttranslational modification, protein turnover, chaperones	GDP-fucose protein O-fucosyltransferase	--	O	Posttranslational modification, protein turnover, chaperones	GDP-fucose protein O-fucosyltransferase 1 [Oncorhynchus mykiss]
gene12863	[G]	Carbohydrate transport and metabolism	Biological Process: sprouting angiogenesis (GO:0002040);; Cellular Component: integral component of membrane (GO:0016021);; Biological Process: positive regulation of glucose import (GO:0046326);; Molecular Function: D-glucose transmembrane transporter activity (GO:0055056);; Biological Process: transmembrane transport (GO:0055085);;	K07299|0|dre:100321338|K07299 MFS transporter, SP family, solute carrier family 2 (facilitated glucose transporter), member 1 | (RefSeq) slc2a1b, si:dkey-92f12.1; solute carrier family 2 (facilitated glucose transporter), member 1b	Adipocytokine signaling pathway (ko04920)	[G]	Carbohydrate transport and metabolism	Sugar (and other) transporter;; Major Facilitator Superfamily	Solute carrier family 2, facilitated glucose transporter member 1 OS=Gallus gallus OX=9031 GN=SLC2A1 PE=2 SV=1	G	Carbohydrate transport and metabolism	unnamed protein product [Oncorhynchus mykiss]
gene2263	--	--	--	K06847|8.50894e-149|dre:321932|K06847 RGM domain family | (RefSeq) hfe2, DL-M, RGMC, RGMr, hjv, id:ibd3464, wu:fb38f10, zgc:136698; hemochromatosis type 2	--	--	--	Repulsive guidance molecule (RGM) N-terminus;; Repulsive guidance molecule (RGM) C-terminus	Repulsive guidance molecule A OS=Gallus gallus OX=9031 GN=RGMA PE=1 SV=1	O	Posttranslational modification, protein turnover, chaperones	hemojuvelin-like [Oncorhynchus mykiss]
gene3331	[DZ]	Cell cycle control, cell division, chromosome partitioning;; Cytoskeleton	--	--	--	[S]	Function unknown	Regulator of chromosome condensation (RCC1) repeat;; Regulator of chromosome condensation (RCC1) repeat	Serine/threonine-protein kinase Nek9 OS=Xenopus laevis OX=8355 GN=nek9 PE=2 SV=1	DZ	Cell cycle control, cell division, chromosome partitioning;; Cytoskeleton	RCC1 domain-containing protein 1-like isoform X3 [Oncorhynchus mykiss]
gene20168	--	--	--	--	--	[Z]	Cytoskeleton	Growth-Arrest-Specific Protein 2 Domain;; Calponin homology (CH) domain	--	Z	Cytoskeleton	GAS2-like protein 1 [Oncorhynchus mykiss]
gene46974	--	--	--	--	--	[UR]	Intracellular trafficking, secretion, and vesicular transport;; General function prediction only	Dynamin family;; Dynamin central region;; 50S ribosome-binding GTPase	Dynamin-1-like protein OS=Danio rerio OX=7955 GN=dnm1l PE=2 SV=1	S	Function unknown	dynamin-1-like [Oncorhynchus mykiss]
gene3221	--	--	--	K16882|0|mze:101476438|K16882 protein piccolo | (RefSeq) protein piccolo-like	--	--	--	Piccolo Zn-finger	Protein piccolo (Fragment) OS=Gallus gallus OX=9031 GN=PCLO PE=2 SV=1	S	Function unknown	protein piccolo-like isoform X1 [Oncorhynchus mykiss]
gene12261	--	--	--	K10174|0|ola:101154909|K10174 T-box brain protein 1 | (RefSeq) tbr1; T-box, brain 1	--	[K]	Transcription	T-box;; T-box transcription factor-associated	Eomesodermin OS=Xenopus laevis OX=8355 GN=eomes PE=2 SV=1	K	Transcription	T-box brain protein 1-like [Oncorhynchus mykiss]
gene30427	--	--	Molecular Function: aspartic-type endopeptidase activity (GO:0004190);; Biological Process: proteolysis (GO:0006508);; Cellular Component: integral component of membrane (GO:0016021);;	K09595|2.87411e-62|tru:101061916|K09595 minor histocompatibility antigen H13 [EC:3.4.23.-] | (RefSeq) hm13; histocompatibility minor 13	--	[S]	Function unknown	Signal peptide peptidase	Signal peptide peptidase-like 2B OS=Gallus gallus OX=9031 GN=SPPL2B PE=2 SV=1	U	Intracellular trafficking, secretion, and vesicular transport	minor histocompatibility antigen H13-like isoform X2 [Oncorhynchus kisutch]
gene41971	--	--	Molecular Function: DNA binding (GO:0003677);; Molecular Function: transcription factor activity, sequence-specific DNA binding (GO:0003700);; Molecular Function: ATP binding (GO:0005524);; Cellular Component: nucleus (GO:0005634);; Biological Process: regulation of transcription, DNA-templated (GO:0006355);;	K09279|0|xma:102223887|K09279 runt-related transcription factor 3 | (RefSeq) runt-related transcription factor 3-like	--	[K]	Transcription	Runt domain;; Runx inhibition domain	Runt-related transcription factor 1 OS=Xenopus laevis OX=8355 GN=runx1 PE=2 SV=2	K	Transcription	runt-related transcription factor 3-like isoform X3 [Oncorhynchus mykiss]
gene13033	--	--	Molecular Function: vasopressin receptor activity (GO:0005000);; Cellular Component: plasma membrane (GO:0005886);; Biological Process: G-protein coupled receptor signaling pathway (GO:0007186);; Cellular Component: integral component of membrane (GO:0016021);;	K04228|7.60018e-178|mze:101474372|K04228 arginine vasopressin receptor 2 | (RefSeq) vasopressin V2 receptor-like	Neuroactive ligand-receptor interaction (ko04080)	[R]	General function prediction only	7 transmembrane receptor (rhodopsin family);; Serpentine type 7TM GPCR chemoreceptor Srv	Isotocin receptor OS=Catostomus commersonii OX=7971 PE=2 SV=1	U	Intracellular trafficking, secretion, and vesicular transport	vasopressin V2 receptor-like [Oncorhynchus mykiss]
gene9752	--	--	Molecular Function: G-protein coupled receptor activity (GO:0004930);; Biological Process: G-protein coupled receptor signaling pathway (GO:0007186);; Cellular Component: integral component of membrane (GO:0016021);;	K08404|0|mze:101476896|K08404 G protein-coupled receptor 17 | (RefSeq) gpr17; G protein-coupled receptor 17	--	--	--	7 transmembrane receptor (rhodopsin family)	P2Y purinoceptor 4 OS=Xenopus laevis OX=8355 GN=p2ry4 PE=2 SV=1	U	Intracellular trafficking, secretion, and vesicular transport	uracil nucleotide/cysteinyl leukotriene receptor [Oncorhynchus mykiss]
gene2001	--	--	--	--	--	[R]	General function prediction only	Atrophin-1 family	--	K	Transcription	arginine-glutamic acid dipeptide repeats protein-like, partial [Oncorhynchus mykiss]
gene11654	[J]	Translation, ribosomal structure and biogenesis	Molecular Function: aminoacyl-tRNA ligase activity (GO:0004812);; Molecular Function: ATP binding (GO:0005524);; Biological Process: tRNA aminoacylation for protein translation (GO:0006418);;	K01883|0|tru:101074195|K01883 cysteinyl-tRNA synthetase [EC:6.1.1.16] | (RefSeq) cars; cysteinyl-tRNA synthetase	Aminoacyl-tRNA biosynthesis (ko00970)	[J]	Translation, ribosomal structure and biogenesis	tRNA synthetases class I (C) catalytic domain;; tRNA synthetases class I (M);; tRNA synthetases class I (C) catalytic domain	Cysteine--tRNA ligase, cytoplasmic OS=Xenopus tropicalis OX=8364 GN=cars PE=2 SV=1	J	Translation, ribosomal structure and biogenesis	cysteine--tRNA ligase, cytoplasmic-like [Oncorhynchus mykiss]
gene28602	--	--	Cellular Component: endoplasmic reticulum (GO:0005783);; Biological Process: Golgi vesicle transport (GO:0048193);;	K20474|6.64448e-88|dre:562894|K20474 RAD50-interacting protein 1 | (RefSeq) rint1, si:dkey-202b22.4, zgc:153458; RAD50 interactor 1	--	[UD]	Intracellular trafficking, secretion, and vesicular transport;; Cell cycle control, cell division, chromosome partitioning	RINT-1 / TIP-1 family	--	S	Function unknown	RAD50-interacting protein 1-like [Oncorhynchus mykiss]
gene18424	--	--	--	--	--	[O]	Posttranslational modification, protein turnover, chaperones	SPRY domain;; SPRY-associated domain	Zinc-binding protein A33 OS=Pleurodeles waltl OX=8319 PE=1 SV=2	S	Function unknown	E3 ubiquitin-protein ligase TRIM39-like [Oncorhynchus mykiss]
Oncorhynchus_mykiss_newGene_52486	[O]	Posttranslational modification, protein turnover, chaperones	Molecular Function: magnesium ion binding (GO:0000287);; Molecular Function: RNA binding (GO:0003723);; Molecular Function: phenylalanine-tRNA ligase activity (GO:0004826);; Molecular Function: ATP binding (GO:0005524);; Biological Process: phenylalanyl-tRNA aminoacylation (GO:0006432);;	--	--	--	--	IQ calmodulin-binding motif	--	S	Function unknown	unnamed protein product [Oncorhynchus mykiss]
gene35185	--	--	Cellular Component: nucleus (GO:0005634);; Cellular Component: membrane (GO:0016020);;	--	--	[D]	Cell cycle control, cell division, chromosome partitioning	Cyclin, N-terminal domain;; Cyclin, C-terminal domain	Cyclin-L1 OS=Xenopus laevis OX=8355 GN=ccnl1 PE=2 SV=2	DKL	Cell cycle control, cell division, chromosome partitioning;; Transcription;; Replication, recombination and repair	cyclin-K-like isoform X1 [Oncorhynchus mykiss]
gene21218	--	--	Molecular Function: RNA polymerase II transcription factor activity, sequence-specific DNA binding (GO:0000981);; Molecular Function: steroid hormone receptor activity (GO:0003707);; Molecular Function: androgen binding (GO:0005497);; Cellular Component: nucleus (GO:0005634);; Biological Process: regulation of transcription, DNA-templated (GO:0006355);; Molecular Function: zinc ion binding (GO:00…	K08557|0|dre:100005148|K08557 androgen receptor | (RefSeq) ar, NR3C4; androgen receptor	Oocyte meiosis (ko04114)	[T]	Signal transduction mechanisms	Ligand-binding domain of nuclear hormone receptor;; Zinc finger, C4 type (two domains)	Androgen receptor OS=Lithobates catesbeiana OX=8400 GN=ar PE=2 SV=1	K	Transcription	unnamed protein product [Oncorhynchus mykiss]
gene6698	--	--	--	--	--	--	--	--	--	--	--	uncharacterized protein LOC110521721 [Oncorhynchus mykiss]
gene40057	--	--	Molecular Function: actin binding (GO:0003779);; Molecular Function: phospholipid binding (GO:0005543);; Biological Process: protein homooligomerization (GO:0051260);;	K06115|0|pps:100976544|K06115 spectrin beta | (RefSeq) SPTBN4; spectrin beta, non-erythrocytic 4	--	[Z]	Cytoskeleton	Spectrin repeat;; Calponin homology (CH) domain;; Pleckstrin homology domain;; PH domain;; CAMSAP CH domain	Alpha-actinin-4 OS=Gallus gallus OX=9031 GN=ACTN4 PE=1 SV=1	Z	Cytoskeleton	spectrin beta chain, non-erythrocytic 4-like [Oncorhynchus mykiss]
gene43764	--	--	Molecular Function: zinc ion binding (GO:0008270);;	--	--	[K]	Transcription	PHD-finger	Zinc finger protein DPF3 OS=Gallus gallus OX=9031 GN=DPF3 PE=2 SV=1	S	Function unknown	zinc finger protein neuro-d4-like [Oncorhynchus mykiss]
Oncorhynchus_mykiss_newGene_43785	--	--	Molecular Function: nucleic acid binding (GO:0003676);; Molecular Function: GTPase activity (GO:0003924);; Molecular Function: GTP binding (GO:0005525);; Biological Process: intracellular protein transport (GO:0006886);; Biological Process: vesicle-mediated transport (GO:0016192);; Cellular Component: membrane coat (GO:0030117);;	--	--	--	--	--	--	--	--	unnamed protein product [Oncorhynchus mykiss]
Oncorhynchus_mykiss_newGene_7276	--	--	--	--	--	--	--	--	--	--	--	E3 ubiquitin-protein ligase HECW2-like isoform X2 [Oncorhynchus mykiss]
gene18366	--	--	Molecular Function: cysteine-type endopeptidase activity (GO:0004197);; Cellular Component: cytoplasm (GO:0005737);; Biological Process: proteolysis (GO:0006508);; Biological Process: autophagy (GO:0006914);; Biological Process: protein transport (GO:0015031);;	K08342|0|dre:554140|K08342 cysteine protease ATG4 [EC:3.4.22.-] | (RefSeq) atg4a, zgc:111958; autophagy related 4A, cysteine peptidase	Regulation of autophagy (ko04140)	[ZU]	Cytoskeleton;; Intracellular trafficking, secretion, and vesicular transport	Peptidase family C54	Cysteine protease ATG4A OS=Xenopus laevis OX=8355 GN=atg4a PE=2 SV=1	O	Posttranslational modification, protein turnover, chaperones	cysteine protease ATG4A [Oncorhynchus mykiss]
gene11200	[DZ]	Cell cycle control, cell division, chromosome partitioning;; Cytoskeleton	Molecular Function: calcium ion binding (GO:0005509);; Cellular Component: integral component of membrane (GO:0016021);; Molecular Function: carbohydrate binding (GO:0030246);;	K04988|0|mze:101479862|K04988 polycystin 1L2 | (RefSeq) pkd1l2; polycystic kidney disease protein 1-like 2	--	[PT]	Inorganic ion transport and metabolism;; Signal transduction mechanisms	Polycystin cation channel;; PLAT/LH2 domain;; Ion transport protein;; GPCR proteolysis site, GPS, motif;; GPCR proteolysis site, GPS, motif	Polycystin-2 OS=Danio rerio OX=7955 GN=pkd2 PE=1 SV=1	U	Intracellular trafficking, secretion, and vesicular transport	polycystic kidney disease protein 1-like 2 isoform X2 [Oncorhynchus mykiss]
gene35915	--	--	--	--	--	--	--	--	--	--	--	protein Jade-1-like, partial [Oncorhynchus mykiss]
gene34496	[L]	Replication, recombination and repair	Molecular Function: GTP binding (GO:0005525);;	--	--	--	--	Root hair defective 3 GTP-binding protein (RHD3);; Dynamin family;; 50S ribosome-binding GTPase;; Guanylate-binding protein, N-terminal domain	--	S	Function unknown	interferon-induced very large GTPase 1-like [Oncorhynchus mykiss]
gene28826	--	--	Molecular Function: G-protein coupled receptor activity (GO:0004930);; Biological Process: G-protein coupled receptor signaling pathway (GO:0007186);; Biological Process: visual perception (GO:0007601);; Biological Process: phototransduction (GO:0007602);; Cellular Component: integral component of membrane (GO:0016021);;	K04254|1.10913e-126|mze:101474781|K04254 retinal G protein coupled receptor | (RefSeq) rgr; retinal G protein coupled receptor	--	[R]	General function prediction only	7 transmembrane receptor (rhodopsin family)	Melanopsin OS=Rutilus rutilus OX=48668 GN=opn4 PE=2 SV=1	U	Intracellular trafficking, secretion, and vesicular transport	RPE-retinal G protein-coupled receptor-like isoform X1 [Oncorhynchus mykiss]
gene13566	--	--	--	--	--	[K]	Transcription	--	--	O	Posttranslational modification, protein turnover, chaperones	E3 ubiquitin-protein ligase Topors-like [Oncorhynchus mykiss]
gene16496	--	--	Cellular Component: mitochondrion (GO:0005739);; Biological Process: protein transport (GO:0015031);; Molecular Function: metal ion binding (GO:0046872);;	K17780|1.59468e-35|dre:793663|K17780 mitochondrial import inner membrane translocase subunit TIM8 | (RefSeq) timm8b; translocase of inner mitochondrial membrane 8 homolog B (yeast)	--	[U]	Intracellular trafficking, secretion, and vesicular transport	Tim10/DDP family zinc finger	Mitochondrial import inner membrane translocase subunit Tim8 A OS=Xenopus laevis OX=8355 GN=timm8a PE=3 SV=1	O	Posttranslational modification, protein turnover, chaperones	mitochondrial import inner membrane translocase subunit Tim8 A-like [Oncorhynchus mykiss]
Oncorhynchus_mykiss_newGene_45885	--	--	--	--	--	--	--	--	--	S	Function unknown	PREDICTED: small proline-rich protein 3-like, partial [Salmo salar]
gene46027	--	--	Molecular Function: GTPase activity (GO:0003924);; Molecular Function: signal transducer activity (GO:0004871);; Molecular Function: GTP binding (GO:0005525);; Biological Process: adenylate cyclase-modulating G-protein coupled receptor signaling pathway (GO:0007188);; Molecular Function: G-protein beta/gamma-subunit complex binding (GO:0031683);;	K04535|0|dre:564915|K04535 guanine nucleotide-binding protein G(z) subunit alpha | (RefSeq) gnaz; guanine nucleotide binding protein (G protein), alpha z polypeptide	--	[DT]	Cell cycle control, cell division, chromosome partitioning;; Signal transduction mechanisms	G-protein alpha subunit;; ADP-ribosylation factor family;; Gtr1/RagA G protein conserved region	Guanine nucleotide-binding protein G(i) subunit alpha-1 OS=Xenopus laevis OX=8355 GN=gnai1 PE=2 SV=3	S	Function unknown	PREDICTED: guanine nucleotide-binding protein G(z) subunit alpha [Salmo salar]
gene3031	--	--	Molecular Function: GTP binding (GO:0005525);; Cellular Component: septin complex (GO:0031105);;	K16944|0|mze:101477230|K16944 septin 7 | (RefSeq) septin-7-like	--	[DZU]	Cell cycle control, cell division, chromosome partitioning;; Cytoskeleton;; Intracellular trafficking, secretion, and vesicular transport	Septin;; 50S ribosome-binding GTPase	Septin-7 OS=Xenopus laevis OX=8355 GN=sept7 PE=2 SV=1	DZ	Cell cycle control, cell division, chromosome partitioning;; Cytoskeleton	septin-7-like isoform X4 [Oncorhynchus kisutch]
gene32067	--	--	Molecular Function: cyclin-dependent protein serine/threonine kinase inhibitor activity (GO:0004861);; Cellular Component: nucleus (GO:0005634);; Biological Process: cell cycle arrest (GO:0007050);; Biological Process: regulation of mitotic cell cycle (GO:0007346);; Biological Process: negative regulation of protein serine/threonine kinase activity (GO:0071901);; Biological Process: signal transd…	K06625|1.18537e-47|tru:105417819|K06625 cyclin-dependent kinase inhibitor 1A | (RefSeq) cyclin-dependent kinase inhibitor 1-like	ErbB signaling pathway (ko04012);; FoxO signaling pathway (ko04068);; Cell cycle (ko04110);; p53 signaling pathway (ko04115)	[T]	Signal transduction mechanisms	Cyclin-dependent kinase inhibitor	--	T	Signal transduction mechanisms	cyclin-dependent kinase inhibitor 1-like isoform X1 [Oncorhynchus mykiss]
gene30925	--	--	--	--	--	--	--	--	--	--	--	cytokine receptor-like factor 2 [Oncorhynchus mykiss]
gene41812	--	--	--	--	--	[S]	Function unknown	Parkin co-regulated protein	--	S	Function unknown	parkin coregulated gene protein [Salmo salar]
gene33808	--	--	Molecular Function: DNA binding (GO:0003677);; Cellular Component: nucleus (GO:0005634);;	--	--	--	--	Homeobox domain;; Homeodomain leucine-zipper encoding, Homez;; Homeobox KN domain	--	K	Transcription	zinc fingers and homeoboxes protein 1-like [Oncorhynchus kisutch]
gene28753	--	--	--	--	--	[R]	General function prediction only	7 transmembrane receptor (rhodopsin family)	Melanopsin-B OS=Xenopus laevis OX=8355 GN=opn4b PE=2 SV=1	U	Intracellular trafficking, secretion, and vesicular transport	opsin-5-like [Oncorhynchus mykiss]
gene31141	--	--	--	K16938|0|xma:102233741|K16938 septin 3/9/12 | (RefSeq) neuronal-specific septin-3-like	--	[DTZ]	Cell cycle control, cell division, chromosome partitioning;; Signal transduction mechanisms;; Cytoskeleton	Septin;; 50S ribosome-binding GTPase;; RsgA GTPase;; Elongation factor Tu GTP binding domain	Neuronal-specific septin-3 OS=Danio rerio OX=7955 GN=sept3 PE=2 SV=1	DZ	Cell cycle control, cell division, chromosome partitioning;; Cytoskeleton	septin-9-like [Oncorhynchus mykiss]
gene43431	--	--	--	--	--	--	--	SKI/SNO/DAC family;; c-SKI Smad4 binding domain	SKI family transcriptional corepressor 1 homolog-B OS=Danio rerio OX=7955 GN=skor1b PE=2 SV=1	K	Transcription	SKI family transcriptional corepressor 1 homolog-B-like [Oncorhynchus mykiss]
gene32946	--	--	--	--	--	[O]	Posttranslational modification, protein turnover, chaperones	Ulp1 protease family, C-terminal catalytic domain	--	O	Posttranslational modification, protein turnover, chaperones	sentrin-specific protease 7-like [Oncorhynchus mykiss]
gene42022	[O]	Posttranslational modification, protein turnover, chaperones	Molecular Function: nucleotide binding (GO:0000166);; Molecular Function: nucleic acid binding (GO:0003676);;	K09537|4.16686e-157|mze:101468831|K09537 DnaJ homolog subfamily C member 17 | (RefSeq) dnajc17; DnaJ heat shock protein family (Hsp40) member C17	--	[O]	Posttranslational modification, protein turnover, chaperones	DnaJ domain;; RNA recognition motif. (a.k.a. RRM, RBD, or RNP domain)	DnaJ homolog subfamily C member 5 OS=Tetronarce californica OX=7787 GN=dnajc5 PE=1 SV=1	O	Posttranslational modification, protein turnover, chaperones	dnaJ homolog subfamily C member 17-like [Oncorhynchus mykiss]
gene11421	--	--	--	--	--	--	--	Armadillo/beta-catenin-like repeat	--	O	Posttranslational modification, protein turnover, chaperones	HEAT repeat-containing protein 3-like [Oncorhynchus mykiss]
Oncorhynchus_mykiss_newGene_37170	--	--	Cellular Component: integral component of membrane (GO:0016021);;	K10784|8.91831e-21|mze:101471379|K10784 T cell receptor alpha chain V region | (RefSeq) uncharacterized LOC101471379	--	--	--	--	--	S	Function unknown	unnamed protein product [Oncorhynchus mykiss]
gene53149	[R]	General function prediction only	Molecular Function: nucleic acid binding (GO:0003676);; Molecular Function: metal ion binding (GO:0046872);;	--	--	[R]	General function prediction only	Zinc-finger double domain;; Zinc finger, C2H2 type;; C2H2-type zinc finger;; C2H2-type zinc finger	Oocyte zinc finger protein XlCOF22 OS=Xenopus laevis OX=8355 PE=3 SV=1	S	Function unknown	zinc finger protein 501-like, partial [Oncorhynchus mykiss]
gene25802	[J]	Translation, ribosomal structure and biogenesis	Molecular Function: nucleotide binding (GO:0000166);; Molecular Function: RNA binding (GO:0003723);;	K12900|5.19263e-28|mze:101486875|K12900 FUS-interacting serine-arginine-rich protein 1 | (RefSeq) srsf10; serine/arginine-rich splicing factor 10	Spliceosome (ko03040)	[R]	General function prediction only	RNA recognition motif. (a.k.a. RRM, RBD, or RNP domain)	Serine/arginine-rich splicing factor 2 OS=Gallus gallus OX=9031 GN=SRSF2 PE=2 SV=1	S	Function unknown	unnamed protein product [Oncorhynchus mykiss]
gene16007	[L]	Replication, recombination and repair	Molecular Function: GTP binding (GO:0005525);;	--	--	--	--	Dynamin family;; 50S ribosome-binding GTPase;; Guanylate-binding protein, N-terminal domain	--	S	Function unknown	up-regulator of cell proliferation-like [Oncorhynchus mykiss]
gene28820	--	--	Biological Process: apoptotic process (GO:0006915);; Molecular Function: ubiquitin binding (GO:0043130);;	--	--	--	--	WD domain, G-beta repeat	WD repeat-containing protein 92 OS=Danio rerio OX=7955 GN=wdr92 PE=2 SV=1	S	Function unknown	WD repeat-containing protein 92 [Oncorhynchus kisutch]
gene1157	--	--	--	K19352|4.24549e-168|cmk:103182602|K19352 coiled-coil and C2 domain-containing protein 2A | (RefSeq) cc2d2b; coiled-coil and C2 domain containing 2B	--	[R]	General function prediction only	CC2D2A N-terminal C2 domain	--	S	Function unknown	coiled-coil and C2 domain-containing protein 2A-like [Oncorhynchus mykiss]
gene4998	--	--	Molecular Function: hormone activity (GO:0005179);; Cellular Component: extracellular region (GO:0005576);; Cellular Component: cell (GO:0005623);; Biological Process: cellular iron ion homeostasis (GO:0006879);; Biological Process: negative regulation of cell proliferation (GO:0008285);; Biological Process: defense response to bacterium (GO:0042742);;	--	--	--	--	Hepcidin	Hepcidin-1 OS=Salmo salar OX=8030 GN=hamp1 PE=3 SV=1	S	Function unknown	hepcidin-like [Oncorhynchus mykiss]
gene17981	[E]	Amino acid transport and metabolism	Molecular Function: hydrolase activity (GO:0016787);;	K16795|1.20755e-134|mze:101484125|K16795 platelet-activating factor acetylhydrolase IB subunit beta/gamma [EC:3.1.1.47] | (RefSeq) pafah1b2; platelet-activating factor acetylhydrolase IB subunit beta	Ether lipid metabolism (ko00565)	[TV]	Signal transduction mechanisms;; Defense mechanisms	GDSL-like Lipase/Acylhydrolase family	Platelet-activating factor acetylhydrolase IB subunit beta OS=Gallus gallus OX=9031 GN=PAFAH1B2 PE=2 SV=1	S	Function unknown	LOW QUALITY PROTEIN: platelet-activating factor acetylhydrolase IB subunit beta-like [Oncorhynchus kisutch]
gene774	--	--	Biological Process: signal transduction (GO:0007165);;	K09855|0|mze:101465220|K09855 Ras association domain-containing protein 7/8 | (RefSeq) ras association domain-containing protein 8-like	--	[W]	Extracellular structures	Ras association (RalGDS/AF-6) domain	--	S	Function unknown	ras association domain-containing protein 8-like [Oncorhynchus kisutch]
Oncorhynchus_mykiss_newGene_66094	[N]	Cell motility	Molecular Function: ribonuclease activity (GO:0004540);; Molecular Function: protein kinase activity (GO:0004672);; Molecular Function: ATP binding (GO:0005524);; Biological Process: mRNA processing (GO:0006397);; Biological Process: protein phosphorylation (GO:0006468);; Biological Process: RNA phosphodiester bond hydrolysis (GO:0090501);;	--	--	[T]	Signal transduction mechanisms	Protein kinase domain;; Protein tyrosine kinase	Dual specificity mitogen-activated protein kinase kinase 6 OS=Danio rerio OX=7955 GN=map2k6 PE=1 SV=2	T	Signal transduction mechanisms	uncharacterized protein LOC110506975 [Oncorhynchus mykiss]
gene8678	--	--	Cellular Component: lysosome (GO:0005764);; Cellular Component: integral component of membrane (GO:0016021);;	--	--	[S]	Function unknown	Frag1/DRAM/Sfk1 family	Modulator of macroautophagy TMEM150B-A OS=Xenopus laevis OX=8355 GN=tmem150b-a PE=2 SV=1	S	Function unknown	transmembrane protein 150C-like isoform X1 [Oncorhynchus mykiss]
gene20341	--	--	Cellular Component: integral component of membrane (GO:0016021);;	--	--	[S]	Function unknown	Frag1/DRAM/Sfk1 family	Transmembrane protein 150A OS=Xenopus tropicalis OX=8364 GN=tmem150a PE=2 SV=1	S	Function unknown	PREDICTED: transmembrane protein 150A-like [Salmo salar]
gene819	--	--	--	K19947|0|lcm:102360081|K19947 protein-methionine sulfoxide oxidase MICAL [EC:1.14.13.-] | (RefSeq) MICAL3; microtubule associated monooxygenase, calponin and LIM domain containing 3	--	[TZ]	Signal transduction mechanisms;; Cytoskeleton	Protein of unknown function (DUF3585);; Calponin homology (CH) domain;; CAMSAP CH domain;; LIM domain;; FAD binding domain	Protein-methionine sulfoxide oxidase mical3a OS=Danio rerio OX=7955 GN=mical3a PE=2 SV=2	Z	Cytoskeleton	protein-methionine sulfoxide oxidase mical3a-like isoform X1 [Oncorhynchus mykiss]
Oncorhynchus_mykiss_newGene_45314	--	--	Cellular Component: membrane (GO:0016020);; Biological Process: regulation of apoptotic process (GO:0042981);;	--	--	--	--	Caspase recruitment domain	--	O	Posttranslational modification, protein turnover, chaperones	uncharacterized protein LOC110514412 [Oncorhynchus mykiss]
gene50344	[R]	General function prediction only	Molecular Function: neurotransmitter:sodium symporter activity (GO:0005328);; Molecular Function: gamma-aminobutyric acid:sodium symporter activity (GO:0005332);; Cellular Component: integral component of plasma membrane (GO:0005887);; Biological Process: neurotransmitter transport (GO:0006836);; Biological Process: gamma-aminobutyric acid transport (GO:0015812);; Biological Process: transmembran…	K05034|7.02931e-71|tru:101061665|K05034 solute carrier family 6 (neurotransmitter transporter, GABA) member 1 | (RefSeq) sodium- and chloride-dependent GABA transporter 1-like	--	[T]	Signal transduction mechanisms	Sodium:neurotransmitter symporter family	Sodium- and chloride-dependent glycine transporter 2 OS=Xenopus laevis OX=8355 GN=slc6a5 PE=2 SV=1	P	Inorganic ion transport and metabolism	sodium- and chloride-dependent GABA transporter 1-like, partial [Oncorhynchus mykiss]
gene44479	[X]	--	--	--	--	--	--	Fibronectin type III domain	Fibronectin type-III domain-containing protein 3a OS=Gallus gallus OX=9031 GN=FNDC3A PE=2 SV=2	S	Function unknown	fibronectin type-III domain-containing protein 3A [Oncorhynchus mykiss]
Oncorhynchus_mykiss_newGene_20436	--	--	Molecular Function: ubiquitin-protein transferase activity (GO:0004842);; Biological Process: protein ubiquitination (GO:0016567);;	K09561|3.12964e-42|mze:101475001|K09561 STIP1 homology and U-box containing protein 1 [EC:2.3.2.27] | (RefSeq) stub1; STIP1 homology and U-box containing protein 1	Ubiquitin mediated proteolysis (ko04120);; Protein processing in endoplasmic reticulum (ko04141)	[O]	Posttranslational modification, protein turnover, chaperones	--	STIP1 homology and U box-containing protein 1 OS=Gallus gallus OX=9031 GN=STUB1 PE=2 SV=1	O	Posttranslational modification, protein turnover, chaperones	STIP1 homology and U box-containing protein 1-like [Oncorhynchus mykiss]
gene42344	--	--	--	--	--	[R]	General function prediction only	Zinc finger, C2H2 type;; Zinc-finger double domain;; C2H2-type zinc finger	Myoneurin OS=Danio rerio OX=7955 GN=mynn PE=2 SV=1	S	Function unknown	B-cell lymphoma/leukemia 11B-like isoform X1 [Oncorhynchus mykiss]
gene26136	--	--	Cellular Component: nucleus (GO:0005634);; Molecular Function: zinc ion binding (GO:0008270);; Biological Process: negative regulation of cell proliferation (GO:0008285);; Biological Process: histone acetylation (GO:0016573);; Molecular Function: methylated histone binding (GO:0035064);; Biological Process: positive regulation of apoptotic process (GO:0043065);;	K11346|2.2323e-140|dre:322113|K11346 inhibitor of growth protein 4 | (RefSeq) ing4, wu:fb11d09, wu:fb50e02, zgc:110619; inhibitor of growth family, member 4	--	[B]	Chromatin structure and dynamics	Inhibitor of growth proteins N-terminal histone-binding	Inhibitor of growth protein 4 OS=Gallus gallus OX=9031 GN=ING4 PE=2 SV=1	B	Chromatin structure and dynamics	inhibitor of growth protein 4-like isoform X2 [Oncorhynchus mykiss]
gene9960	--	--	Cellular Component: integral component of membrane (GO:0016021);;	--	--	[R]	General function prediction only	LMBR1-like membrane protein	LMBR1 domain-containing protein 2-B OS=Danio rerio OX=7955 GN=lmbrd2b PE=2 SV=1	S	Function unknown	LMBR1 domain-containing protein 2-B-like [Oncorhynchus mykiss]
gene27231	--	--	Molecular Function: transcription factor activity, sequence-specific DNA binding (GO:0003700);; Cellular Component: nucleus (GO:0005634);; Cellular Component: cytoplasm (GO:0005737);; Biological Process: brain development (GO:0007420);; Biological Process: dorsal/ventral pattern formation (GO:0009953);; Biological Process: positive regulation of BMP signaling pathway (GO:0030513);; Biological Pro…	--	--	[K]	Transcription	TSC-22/dip/bun family	TSC22 domain family protein 1 OS=Gallus gallus OX=9031 GN=TSC22D1 PE=2 SV=2	K	Transcription	uncharacterized protein LOC110489223 isoform X1 [Oncorhynchus mykiss]
gene21980	--	--	Cellular Component: mitochondrion (GO:0005739);; Biological Process: mitochondrial respiratory chain complex IV assembly (GO:0033617);;	K18186|1.7071e-36|mze:101484897|K18186 protein PET100, animal type | (RefSeq) pet100; PET100 homolog	--	[S]	Function unknown	Pet100	--	S	Function unknown	PREDICTED: protein PET100 homolog, mitochondrial-like [Salmo salar]
gene8898	[F]	Nucleotide transport and metabolism	--	K00942|2.87495e-106|xma:102235645|K00942 guanylate kinase [EC:2.7.4.8] | (RefSeq) guanylate kinase-like	Purine metabolism (ko00230)	[F]	Nucleotide transport and metabolism	Guanylate kinase;; AAA ATPase domain;; ABC transporter;; AAA domain;; RsgA GTPase;; 50S ribosome-binding GTPase;; AAA domain;; AAA domain;; P-loop containing region of AAA domain;; RNA helicase;; CobW/HypB/UreG, nucleotide-binding domain;; NACHT domain;; AAA domain;; AAA domain;; AAA domain;; Adenovirus IVa2 protein;; Zeta toxin;; NTPase;; ATPase family associated with various cellular activities…	MAGUK p55 subfamily member 5-A OS=Danio rerio OX=7955 GN=mpp5a PE=1 SV=2	F	Nucleotide transport and metabolism	MAGUK p55 subfamily member 5-like isoform X3 [Oncorhynchus mykiss]
gene8914	--	--	Cellular Component: nucleus (GO:0005634);; Biological Process: regulation of transcription, DNA-templated (GO:0006355);; Molecular Function: zinc ion binding (GO:0008270);; Molecular Function: sequence-specific DNA binding (GO:0043565);;	K09375|0|mze:101479906|K09375 LIM homeobox protein 6/8 | (RefSeq) lhx8; LIM homeobox 8	--	[R]	General function prediction only	LIM domain;; Homeobox domain;; Homeobox KN domain	LIM/homeobox protein Lhx9 OS=Astyanax fasciatus OX=223369 GN=lhx9 PE=2 SV=1	K	Transcription	LIM/homeobox protein Lhx8-like isoform X1 [Oncorhynchus mykiss]
gene12947	[M]	Cell wall/membrane/envelope biogenesis	Molecular Function: protein serine/threonine kinase activity (GO:0004674);; Molecular Function: ATP binding (GO:0005524);; Biological Process: protein phosphorylation (GO:0006468);;	K15596|0|mze:101468598|K15596 cyclin-dependent kinase 18 [EC:2.7.11.22] | (RefSeq) cdk18; cyclin-dependent kinase 18	--	[R]	General function prediction only	Protein kinase domain;; Protein tyrosine kinase;; Haspin like kinase domain;; Kinase-like	Cyclin-dependent kinase 14 OS=Xenopus tropicalis OX=8364 GN=cdk14 PE=2 SV=1	T	Signal transduction mechanisms	cyclin-dependent kinase 18-like isoform X1 [Oncorhynchus mykiss]
Oncorhynchus_mykiss_newGene_63426	--	--	Molecular Function: nucleic acid binding (GO:0003676);; Molecular Function: protein kinase C activity (GO:0004697);; Molecular Function: ATP binding (GO:0005524);; Biological Process: protein phosphorylation (GO:0006468);; Biological Process: intracellular protein transport (GO:0006886);; Biological Process: vesicle-mediated transport (GO:0016192);; Cellular Component: membrane coat (GO:0030117);…	--	--	[R]	General function prediction only	--	--	S	Function unknown	unnamed protein product [Oncorhynchus mykiss]
Oncorhynchus_mykiss_newGene_37314	--	--	--	--	--	--	--	--	--	S	Function unknown	DNA repair-scaffolding protein [Oncorhynchus kisutch]
gene12912	[R]	General function prediction only	Molecular Function: voltage-gated potassium channel activity (GO:0005249);; Cellular Component: cytoplasm (GO:0005737);; Cellular Component: integral component of membrane (GO:0016021);; Biological Process: potassium ion transmembrane transport (GO:0071805);;	K04883|4.50297e-171|xma:102227926|K04883 potassium voltage-gated channel Shaker-related subfamily A, beta member 2 | (RefSeq) voltage-gated potassium channel subunit beta-2	--	[C]	Energy production and conversion	Aldo/keto reductase family	Voltage-gated potassium channel subunit beta-2 OS=Xenopus laevis OX=8355 GN=kcnab2 PE=2 SV=1	C	Energy production and conversion	PREDICTED: voltage-gated potassium channel subunit beta-2-like isoform X2 [Salmo salar]
gene48078	[M]	Cell wall/membrane/envelope biogenesis	Molecular Function: glycogen (starch) synthase activity (GO:0004373);; Biological Process: glycogen biosynthetic process (GO:0005978);;	K00693|1.31251e-81|mze:101485531|K00693 glycogen synthase [EC:2.4.1.11] | (RefSeq) gys1; glycogen synthase 1	Starch and sucrose metabolism (ko00500);; Insulin signaling pathway (ko04910)	[G]	Carbohydrate transport and metabolism	Glycogen synthase	--	M	Cell wall/membrane/envelope biogenesis	glycogen [starch] synthase, muscle-like, partial [Oncorhynchus mykiss]
gene23463	--	--	Cellular Component: extracellular region (GO:0005576);; Molecular Function: growth factor activity (GO:0008083);;	--	--	--	--	Transforming growth factor beta like domain	Glial cell line-derived neurotrophic factor OS=Danio rerio OX=7955 GN=gdnf PE=2 SV=1	O	Posttranslational modification, protein turnover, chaperones	persephin-like [Oncorhynchus mykiss]
gene13366	[T]	Signal transduction mechanisms	Molecular Function: protein serine/threonine kinase activity (GO:0004674);; Molecular Function: ATP binding (GO:0005524);; Biological Process: protein phosphorylation (GO:0006468);;	K08867|3.19561e-174|xma:102234975|K08867 WNK lysine deficient protein kinase [EC:2.7.11.1] | (RefSeq) serine/threonine-protein kinase WNK2-like	--	[R]	General function prediction only	Protein kinase domain;; Oxidative-stress-responsive kinase 1 C-terminal domain;; Protein tyrosine kinase	Serine/threonine-protein kinase B-raf OS=Coturnix japonica OX=93934 GN=BRAF PE=2 SV=1	T	Signal transduction mechanisms	serine/threonine-protein kinase WNK1-like, partial [Oncorhynchus mykiss]
gene46452	--	--	--	--	--	[E]	Amino acid transport and metabolism	Serine hydrolase (FSH1)	Esterase OVCA2 OS=Danio rerio OX=7955 GN=ovca2 PE=2 SV=1	S	Function unknown	esterase OVCA2 isoform X2 [Oncorhynchus mykiss]
Oncorhynchus_mykiss_newGene_59270	--	--	Cellular Component: extracellular space (GO:0005615);; Biological Process: defense response to virus (GO:0051607);; Biological Process: cellular response to type I interferon (GO:0071357);; Biological Process: cellular response to virus (GO:0098586);;	--	--	--	--	Ubiquitin family;; Ubiquitin-2 like Rad60 SUMO-like	--	S	Function unknown	unnamed protein product [Oncorhynchus mykiss]
gene23223	[IQR]	Lipid transport and metabolism;; Secondary metabolites biosynthesis, transport and catabolism;; General function prediction only	--	K11150|1.07959e-102|xma:102218649|K11150 retinol dehydrogenase 8 [EC:1.1.1.-] | (RefSeq) retinol dehydrogenase 8-like	Retinol metabolism (ko00830)	[Q]	Secondary metabolites biosynthesis, transport and catabolism	--	--	S	Function unknown	PREDICTED: retinol dehydrogenase 8-like [Salmo salar]
gene10754	--	--	Biological Process: protein glycosylation (GO:0006486);; Molecular Function: fucosyltransferase activity (GO:0008417);; Cellular Component: integral component of membrane (GO:0016021);; Cellular Component: Golgi cisterna membrane (GO:0032580);; Biological Process: fucosylation (GO:0036065);;	K07635|2.58727e-127|tru:446078|K07635 galactoside alpha-1,3-fucosyltransferase 7 [EC:2.4.1.-] | (RefSeq) fut7b; alpha3-fucosyltransferase	Other types of O-glycan biosynthesis (ko00514);; Glycosphingolipid biosynthesis - lacto and neolacto series (ko00601)	[GE]	Carbohydrate transport and metabolism;; Amino acid transport and metabolism	Glycosyltransferase family 10 (fucosyltransferase) C-term;; Fucosyltransferase, N-terminal	Alpha-(1,3)-fucosyltransferase 11 OS=Oryzias latipes OX=8090 GN=fut11 PE=2 SV=1	S	Function unknown	alpha-(1,3)-fucosyltransferase 7-like [Oncorhynchus mykiss]
gene37085	[K]	Transcription	Cellular Component: proteinaceous extracellular matrix (GO:0005578);; Biological Process: visual perception (GO:0007601);; Biological Process: collagen fibril organization (GO:0030199);; Biological Process: embryonic camera-type eye morphogenesis (GO:0048596);;	K08122|6.46455e-177|mze:101466877|K08122 lumican | (RefSeq) lum; lumican	--	[R]	General function prediction only	Leucine rich repeat;; Leucine Rich repeats (2 copies);; Leucine rich repeat N-terminal domain;; Leucine Rich repeat;; Leucine Rich Repeat	Lumican OS=Gallus gallus OX=9031 GN=LUM PE=1 SV=1	S	Function unknown	lumican-like [Oncorhynchus mykiss]
gene19891	--	--	Molecular Function: guanyl-nucleotide exchange factor activity (GO:0005085);; Cellular Component: intracellular (GO:0005622);; Biological Process: small GTPase mediated signal transduction (GO:0007264);; Biological Process: positive regulation of GTPase activity (GO:0043547);;	--	--	--	--	RasGEF domain;; SH2 domain	Breast cancer anti-estrogen resistance protein 3 homolog OS=Xenopus laevis OX=8355 GN=bcar3 PE=2 SV=1	S	Function unknown	SH2 domain-containing protein 3C-like isoform X2 [Oncorhynchus mykiss]
Oncorhynchus_mykiss_newGene_58579	--	--	--	--	--	--	--	--	--	--	--	chitinase-like protein PB1E7.04c [Oncorhynchus kisutch]
gene735	--	--	--	K16674|0|tru:101080128|K16674 four-jointed box protein 1 | (RefSeq) fjx1; four jointed box 1	--	--	--	--	Four-jointed box protein 1 OS=Xiphophorus maculatus OX=8083 GN=fjx1 PE=2 SV=1	S	Function unknown	four-jointed box protein 1-like [Oncorhynchus mykiss]
gene1574	[V]	Defense mechanisms	Molecular Function: ATP binding (GO:0005524);; Biological Process: transport (GO:0006810);; Cellular Component: integral component of membrane (GO:0016021);; Molecular Function: ATPase activity (GO:0016887);;	--	--	[IR]	Lipid transport and metabolism;; General function prediction only	ABC-2 type transporter;; ABC-2 family transporter protein;; ABC transporter	--	V	Defense mechanisms	uncharacterized protein LOC110532855 [Oncorhynchus mykiss]
gene22116	--	--	Molecular Function: beta-1,4-mannosylglycoprotein 4-beta-N-acetylglucosaminyltransferase activity (GO:0003830);; Biological Process: protein N-linked glycosylation (GO:0006487);; Cellular Component: membrane (GO:0016020);;	K00737|0|dre:570828|K00737 beta-1,4-mannosyl-glycoprotein beta-1,4-N-acetylglucosaminyltransferase [EC:2.4.1.144] | (RefSeq) mgat3b, mgat3; mannosyl (beta-1,4-)-glycoprotein beta-1,4-N-acetylglucosaminyltransferase b	N-Glycan biosynthesis (ko00510)	--	--	Glycosyltransferase family 17	--	S	Function unknown	beta-1,4-mannosyl-glycoprotein 4-beta-N-acetylglucosaminyltransferase-like [Oncorhynchus mykiss]
gene10456	--	--	--	K10421|0|mze:101463599|K10421 CAP-Gly domain-containing linker protein 1 | (RefSeq) clip1; CAP-Gly domain containing linker protein 1	mTOR signaling pathway (ko04150)	[ZR]	Cytoskeleton;; General function prediction only	CAP-Gly domain;; CLIP1 zinc knuckle	CAP-Gly domain-containing linker protein 1 OS=Gallus gallus OX=9031 GN=CLIP1 PE=2 SV=1	D	Cell cycle control, cell division, chromosome partitioning	CAP-Gly domain-containing linker protein 1-like isoform X1 [Oncorhynchus mykiss]
gene40322	--	--	--	--	--	[TZ]	Signal transduction mechanisms;; Cytoskeleton	Formin Homology 2 Domain	Inverted formin-2 OS=Xenopus laevis OX=8355 GN=inf2 PE=2 SV=1	S	Function unknown	inverted formin-2-like [Oncorhynchus mykiss]
Oncorhynchus_mykiss_newGene_15040	--	--	Molecular Function: GTP binding (GO:0005525);; Cellular Component: intracellular (GO:0005622);; Biological Process: small GTPase mediated signal transduction (GO:0007264);;	K07920|6.33139e-24|myb:102262826|K07920 Ras-related protein Rab-33B | (RefSeq) ras-related protein Rab-33B-like	--	[TU]	Signal transduction mechanisms;; Intracellular trafficking, secretion, and vesicular transport	Ras family;; Ras of Complex, Roc, domain of DAPkinase	Ras-related protein Rab-33B OS=Gallus gallus OX=9031 GN=RAB33B PE=2 SV=1	S	Function unknown	ras-related protein Rab-33B-like [Oncorhynchus mykiss]
gene46064	--	--	Molecular Function: nucleic acid binding (GO:0003676);;	K11276|1.02271e-97|tru:101078706|K11276 nucleophosmin 1 | (RefSeq) npm1; nucleophosmin	--	--	--	Nucleoplasmin/nucleophosmin domain;; Nucleophosmin C-terminal domain	Nucleophosmin OS=Xenopus laevis OX=8355 GN=npm1 PE=1 SV=1	S	Function unknown	nucleophosmin-like [Oncorhynchus mykiss]
gene47003	--	--	Molecular Function: protein serine/threonine kinase activity (GO:0004674);; Molecular Function: ATP binding (GO:0005524);; Biological Process: protein phosphorylation (GO:0006468);;	K06640|6.32343e-45|xma:102225301|K06640 serine/threonine-protein kinase ATR [EC:2.7.11.1] | (RefSeq) atr; ATR serine/threonine kinase	Fanconi anemia pathway (ko03460);; Cell cycle (ko04110);; p53 signaling pathway (ko04115)	[TBLD]	Signal transduction mechanisms;; Chromatin structure and dynamics;; Replication, recombination and repair;; Cell cycle control, cell division, chromosome partitioning	Phosphatidylinositol 3- and 4-kinase	Serine/threonine-protein kinase atr OS=Xenopus laevis OX=8355 GN=atr PE=1 SV=2	BDLTU	Chromatin structure and dynamics;; Cell cycle control, cell division, chromosome partitioning;; Replication, recombination and repair;; Signal transduction mechanisms;; Intracellular trafficking, secretion, and vesicular transport	serine/threonine-protein kinase ATR [Oncorhynchus mykiss]
Oncorhynchus_mykiss_newGene_1137	--	--	--	--	--	--	--	--	--	--	--	protein SFI1 homolog [Salvelinus alpinus]
Oncorhynchus_mykiss_newGene_66074	--	--	--	K06766|6.48849e-26|tru:101074131|K06766 neogenin | (RefSeq) neo1; neogenin 1	Cell adhesion molecules (CAMs) (ko04514)	[T]	Signal transduction mechanisms	Fibronectin type III domain	Neogenin (Fragment) OS=Gallus gallus OX=9031 PE=2 SV=1	S	Function unknown	PREDICTED: neogenin-like [Salmo salar]
Oncorhynchus_mykiss_newGene_37910	--	--	--	--	--	--	--	--	--	--	--	anaphase-promoting complex subunit 10 [Oncorhynchus mykiss]
gene14661	--	--	Cellular Component: integral component of membrane (GO:0016021);; Molecular Function: heparan sulfate sulfotransferase activity (GO:0034483);; Biological Process: epiboly involved in gastrulation with mouth forming second (GO:0055113);; Biological Process: regulation of canonical Wnt signaling pathway (GO:0060828);; Biological Process: regulation of cell-cell adhesion mediated by cadherin (GO:200…	K02513|0|mze:101488004|K02513 heparan sulfate 2-O-sulfotransferase HS2ST1 [EC:2.8.2.-] | (RefSeq) hs2st1; heparan sulfate 2-O-sulfotransferase 1	Glycosaminoglycan biosynthesis - heparan sulfate / heparin (ko00534)	[O]	Posttranslational modification, protein turnover, chaperones	Sulfotransferase family	Heparan sulfate 2-O-sulfotransferase 1 OS=Gallus gallus OX=9031 GN=HS2ST1 PE=1 SV=1	S	Function unknown	heparan sulfate 2-O-sulfotransferase 1-like [Oncorhynchus mykiss]
gene28348	--	--	--	--	--	--	--	TAFA family	--	S	Function unknown	protein FAM19A2-like [Oncorhynchus mykiss]
gene28104	--	--	--	--	--	--	--	--	--	--	--	uncharacterized protein LOC110490181 [Oncorhynchus mykiss]
gene55119	[E]	Amino acid transport and metabolism	Biological Process: amino acid transmembrane transport (GO:0003333);; Molecular Function: amino acid transmembrane transporter activity (GO:0015171);; Cellular Component: integral component of membrane (GO:0016021);;	K13868|2.0999e-54|mze:101464823|K13868 solute carrier family 7 (L-type amino acid transporter), member 9 | (RefSeq) slc7a9; solute carrier family 7 member 9	--	[E]	Amino acid transport and metabolism	Amino acid permease	Y+L amino acid transporter 2 OS=Xenopus tropicalis OX=8364 GN=slc7a6 PE=2 SV=1	E	Amino acid transport and metabolism	b(0,+)-type amino acid transporter 1-like [Oncorhynchus mykiss]
gene35577	--	--	Cellular Component: integral component of membrane (GO:0016021);;	--	--	--	--	Beta-casein like protein	--	S	Function unknown	keratinocyte-associated protein 3-like [Oncorhynchus kisutch]
Oncorhynchus_mykiss_newGene_36429	--	--	--	--	--	--	--	--	--	--	--	unnamed protein product [Oncorhynchus mykiss]
gene49545	--	--	Cellular Component: voltage-gated calcium channel complex (GO:0005891);; Molecular Function: low voltage-gated calcium channel activity (GO:0008332);; Biological Process: regulation of ion transmembrane transport (GO:0034765);; Biological Process: calcium ion import (GO:0070509);; Biological Process: calcium ion transmembrane transport (GO:0070588);;	K04855|7.47053e-48|tru:101061940|K04855 voltage-dependent calcium channel T type alpha-1H | (RefSeq) voltage-dependent T-type calcium channel subunit alpha-1H-like	MAPK signaling pathway (ko04010);; Calcium signaling pathway (ko04020)	[PT]	Inorganic ion transport and metabolism;; Signal transduction mechanisms	--	--	U	Intracellular trafficking, secretion, and vesicular transport	voltage-dependent T-type calcium channel subunit alpha-1H-like, partial [Oncorhynchus mykiss]
gene14330	--	--	Molecular Function: DNA binding (GO:0003677);; Biological Process: transposition, DNA-mediated (GO:0006313);; Biological Process: neuron-neuron synaptic transmission (GO:0007270);; Biological Process: DNA integration (GO:0015074);;	--	--	[T]	Signal transduction mechanisms	Guanylate-kinase-associated protein (GKAP) protein	Disks large-associated protein 1 OS=Danio rerio OX=7955 GN=dlgap1 PE=3 SV=2	S	Function unknown	disks large-associated protein 2-like [Oncorhynchus mykiss]
gene15212	--	--	Molecular Function: nucleotide binding (GO:0000166);;	K12875|2.38076e-123|mze:101464651|K12875 apoptotic chromatin condensation inducer in the nucleus | (RefSeq) acin1; apoptotic chromatin condensation inducer 1	RNA transport (ko03013);; mRNA surveillance pathway (ko03015);; Spliceosome (ko03040)	[B]	Chromatin structure and dynamics	RNSP1-SAP18 binding (RSB) motif	--	S	Function unknown	apoptotic chromatin condensation inducer in the nucleus-like [Oncorhynchus mykiss]
gene16565	--	--	Molecular Function: carbohydrate binding (GO:0030246);;	K17527|2.38454e-150|dre:767641|K17527 intelectin | (RefSeq) si:ch211-194p6.4; zgc:153219	--	--	--	Fibrinogen beta and gamma chains, C-terminal globular domain	Intelectin OS=Oncorhynchus mykiss OX=8022 GN=itln PE=1 SV=1	S	Function unknown	intelectin [Oncorhynchus mykiss]
gene7147	--	--	Cellular Component: extracellular region (GO:0005576);; Cellular Component: collagen trimer (GO:0005581);;	K19479|3.11715e-103|mze:101475390|K19479 collagen, type X, alpha | (RefSeq) collagen alpha-1(X) chain-like	--	--	--	Collagen triple helix repeat (20 copies);; C1q domain	Collagen alpha-1(X) chain OS=Gallus gallus OX=9031 GN=COL10A1 PE=1 SV=4	S	Function unknown	collagen alpha-1(X) chain-like [Oncorhynchus mykiss]
gene51805	--	--	Cellular Component: integral component of membrane (GO:0016021);;	--	--	--	--	--	Uncharacterized protein C16orf52 homolog B OS=Xenopus laevis OX=8355 PE=2 SV=1	S	Function unknown	hypothetical protein XENTR_v900234252mg, partial [Xenopus tropicalis]
Oncorhynchus_mykiss_newGene_43340	[R]	General function prediction only	--	--	--	--	--	Herpes virus major outer envelope glycoprotein (BLLF1);; Major surface glycoprotein;; Domain of unknown function (DUF4744)	--	S	Function unknown	unnamed protein product, partial [Oncorhynchus mykiss]
gene5096	--	--	--	K04446|0|mze:101485322|K04446 nuclear factor of activated T-cells, cytoplasmic 1 | (RefSeq) nfatc1; nuclear factor of activated T-cells 1	MAPK signaling pathway (ko04010);; Wnt signaling pathway (ko04310);; AGE-RAGE signaling pathway in diabetic complications (ko04933)	--	--	Rel homology dimerisation domain;; Rel homology DNA-binding domain;; IPT/TIG domain	--	K	Transcription	nuclear factor of activated T-cells, cytoplasmic 1-like isoform X1 [Oncorhynchus mykiss]
Oncorhynchus_mykiss_newGene_12277	--	--	--	K05069|4.96418e-09|mze:101486983|K05069 interleukin 2 receptor beta | (RefSeq) interleukin-2 receptor subunit beta-like	Cytokine-cytokine receptor interaction (ko04060);; Endocytosis (ko04144)	--	--	--	--	U	Intracellular trafficking, secretion, and vesicular transport	interleukin-2 receptor subunit beta-like [Oncorhynchus mykiss]
gene16861	[R]	General function prediction only	Cellular Component: nucleus (GO:0005634);; Cellular Component: chromosome (GO:0005694);; Molecular Function: zinc ion binding (GO:0008270);; Molecular Function: histone-lysine N-methyltransferase activity (GO:0018024);; Biological Process: histone lysine methylation (GO:0034968);;	K11419|0|dre:326906|K11419 histone-lysine N-methyltransferase SUV39H [EC:2.1.1.43] | (RefSeq) suv39h1b, fe47h06, wu:fb18a10, wu:fe47h06, zgc:136593; suppressor of variegation 3-9 homolog 1b	Lysine degradation (ko00310)	[BK]	Chromatin structure and dynamics;; Transcription	SET domain;; Pre-SET motif;; Chromo (CHRromatin Organisation MOdifier) domain	Histone-lysine N-methyltransferase SUV39H1 OS=Xenopus laevis OX=8355 GN=suv39h1 PE=2 SV=1	S	Function unknown	histone-lysine N-methyltransferase SUV39H1-like isoform X1 [Oncorhynchus mykiss]
gene25141	--	--	--	--	--	--	--	US22 like	--	S	Function unknown	uncharacterized protein LOC110486979 isoform X1 [Oncorhynchus mykiss]
gene7597	--	--	Molecular Function: metal ion binding (GO:0046872);;	K13619|0|dre:570320|K13619 phospholipase DDHD1 [EC:3.1.1.-] | (RefSeq) ddhd1b, ddhd1, si:dkey-29m11.6, si:dkey-63j12.5; DDHD domain containing 1b	--	[IU]	Lipid transport and metabolism;; Intracellular trafficking, secretion, and vesicular transport	DDHD domain;; WWE domain	--	S	Function unknown	phospholipase DDHD1-like [Oncorhynchus mykiss]
gene34856	[R]	General function prediction only	Molecular Function: nucleic acid binding (GO:0003676);; Molecular Function: metal ion binding (GO:0046872);;	K09228|1.5921e-32|mde:101892748|K09228 KRAB domain-containing zinc finger protein | (RefSeq) zinc finger protein Xfin	--	[R]	General function prediction only	Zinc-finger double domain;; Zinc finger, C2H2 type;; C2H2-type zinc finger	Oocyte zinc finger protein XlCOF20 (Fragment) OS=Xenopus laevis OX=8355 PE=3 SV=1	S	Function unknown	uncharacterized protein LOC110498491 isoform X1 [Oncorhynchus mykiss]
gene25751	--	--	--	--	--	--	--	--	Protein FAM133 OS=Gallus gallus OX=9031 GN=FAM133 PE=2 SV=1	S	Function unknown	protein FAM133B isoform X2 [Oncorhynchus mykiss]
Oncorhynchus_mykiss_newGene_54575	--	--	Molecular Function: methyltransferase activity (GO:0008168);; Cellular Component: integral component of membrane (GO:0016021);; Molecular Function: oxidoreductase activity, acting on paired donors, with incorporation or reduction of molecular oxygen, 2-oxoglutarate as one donor, and incorporation of one atom each of oxygen into both donors (GO:0016706);; Biological Process: methylation (GO:003225…	--	--	--	--	--	--	S	Function unknown	unnamed protein product [Oncorhynchus mykiss]
gene43535	--	--	Molecular Function: tRNA binding (GO:0000049);; Molecular Function: mRNA binding (GO:0003729);; Molecular Function: translation initiation factor activity (GO:0003743);; Biological Process: translational initiation (GO:0006413);; Biological Process: regulation of translation (GO:0006417);; Cellular Component: cytosolic small ribosomal subunit (GO:0022627);; Molecular Function: ribosome binding (G…	K15026|0|dre:573991|K15026 translation initiation factor 2A | (RefSeq) eif2a, im:7145971, zgc:110460; eukaryotic translation initiation factor 2A	--	[J]	Translation, ribosomal structure and biogenesis	Eukaryotic translation initiation factor eIF2A	Eukaryotic translation initiation factor 2A OS=Danio rerio OX=7955 GN=eif2a PE=2 SV=1	J	Translation, ribosomal structure and biogenesis	eukaryotic translation initiation factor 2A-like [Oncorhynchus mykiss]
gene557	--	--	Molecular Function: transcription factor activity, RNA polymerase II transcription factor binding (GO:0001076);; Molecular Function: DNA binding (GO:0003677);; Molecular Function: transcription coactivator activity (GO:0003713);; Biological Process: regulation of transcription from RNA polymerase II promoter (GO:0006357);; Cellular Component: core-binding factor complex (GO:0016513);; Cellular Co…	--	--	[K]	Transcription	Core binding factor beta subunit	--	K	Transcription	PREDICTED: core-binding factor subunit beta isoform X1 [Salmo salar]
gene39327	--	--	Biological Process: signal transduction (GO:0007165);;	--	--	--	--	Death domain	--	S	Function unknown	ectodysplasin-A receptor-associated adapter protein-like isoform X1 [Oncorhynchus kisutch]
gene45481	--	--	Molecular Function: mechanically-gated ion channel activity (GO:0008381);; Cellular Component: integral component of membrane (GO:0016021);; Biological Process: ion transmembrane transport (GO:0034220);;	--	--	[S]	Function unknown	Piezo non-specific cation channel, R-Ras-binding domain	--	S	Function unknown	PREDICTED: piezo-type mechanosensitive ion channel component 2-like, partial [Salmo salar]
Oncorhynchus_mykiss_newGene_59205	--	--	--	--	--	--	--	--	--	--	--	uncharacterized protein LOC111963096 isoform X2 [Salvelinus alpinus]
gene37312	[R]	General function prediction only	Cellular Component: intracellular (GO:0005622);; Biological Process: protein ubiquitination (GO:0016567);; Biological Process: intracellular signal transduction (GO:0035556);;	K10335|9.82525e-145|dre:563551|K10335 ankyrin repeat and SOCS box protein 13 | (RefSeq) asb13a.2, si:dkey-108d22.2; ankyrin repeat and SOCS box containing 13a, tandem duplicate 2	--	[R]	General function prediction only	Ankyrin repeats (many copies);; Ankyrin repeats (3 copies);; Ankyrin repeat;; Ankyrin repeat;; Ankyrin repeats (many copies);; SOCS box	Caskin-2 OS=Xenopus laevis OX=8355 GN=caskin2 PE=2 SV=1	S	Function unknown	ankyrin repeat and SOCS box protein 13-like isoform X1 [Oncorhynchus mykiss]
gene32933	--	--	--	--	--	--	--	Cortactin-binding protein-2	Filamin A-interacting protein 1-like OS=Danio rerio OX=7955 GN=filip1l PE=2 SV=1	S	Function unknown	filamin A-interacting protein 1-like isoform X1 [Oncorhynchus mykiss]
gene4034	--	--	Molecular Function: arylesterase activity (GO:0004064);;	K01045|2.48164e-40|ola:101175104|K01045 arylesterase / paraoxonase [EC:3.1.1.2 3.1.8.1] | (RefSeq) serum paraoxonase/arylesterase 2-like	--	--	--	--	Serum paraoxonase/arylesterase 2 OS=Gallus gallus OX=9031 GN=PON2 PE=2 SV=1	G	Carbohydrate transport and metabolism	serum paraoxonase/lactonase 3-like [Oncorhynchus mykiss]
gene1660	[I]	Lipid transport and metabolism	Molecular Function: acyl-CoA dehydrogenase activity (GO:0003995);; Molecular Function: flavin adenine dinucleotide binding (GO:0050660);; Biological Process: oxidation-reduction process (GO:0055114);;	K09478|3.35219e-81|mze:101471898|K09478 short/branched chain acyl-CoA dehydrogenase [EC:1.3.99.12] | (RefSeq) acadsb; acyl-CoA dehydrogenase, short/branched chain	Fatty acid degradation (ko00071);; Valine, leucine and isoleucine degradation (ko00280);; Fatty acid metabolism (ko01212)	[I]	Lipid transport and metabolism	Acyl-CoA dehydrogenase, N-terminal domain;; Acyl-CoA dehydrogenase, C-terminal domain	--	I	Lipid transport and metabolism	LOW QUALITY PROTEIN: short/branched chain specific acyl-CoA dehydrogenase, mitochondrial-like [Salvelinus alpinus]
gene2572	--	--	--	--	--	--	--	--	--	--	--	uncharacterized protein LOC110489123 [Oncorhynchus mykiss]
gene49538	--	--	--	--	--	--	--	--	Stonustoxin subunit beta OS=Synanceia horrida OX=13279 PE=1 SV=3	S	Function unknown	stonustoxin subunit beta-like [Oncorhynchus mykiss]
gene33018	--	--	Molecular Function: DNA binding (GO:0003677);; Cellular Component: nucleus (GO:0005634);; Biological Process: double-strand break repair (GO:0006302);; Biological Process: DNA recombination (GO:0006310);;	K10980|1.18564e-89|mze:101470251|K10980 non-homologous end-joining factor 1 | (RefSeq) nhej1; non-homologous end joining factor 1	Non-homologous end-joining (ko03450)	--	--	XLF-Cernunnos, XRcc4-like factor, NHEJ component	Non-homologous end-joining factor 1 OS=Danio rerio OX=7955 GN=nhej1 PE=2 SV=1	A	RNA processing and modification	non-homologous end-joining factor 1-like isoform X2 [Oncorhynchus mykiss]
gene34968	[G]	Carbohydrate transport and metabolism	Molecular Function: beta-galactosidase activity (GO:0004565);; Biological Process: carbohydrate metabolic process (GO:0005975);;	K12309|5.19175e-29|ola:101167424|K12309 beta-galactosidase [EC:3.2.1.23] | (RefSeq) glb1; galactosidase beta 1	Galactose metabolism (ko00052);; Other glycan degradation (ko00511);; Glycosaminoglycan degradation (ko00531);; Sphingolipid metabolism (ko00600);; Glycosphingolipid biosynthesis - ganglio series (ko00604);; Lysosome (ko04142)	[G]	Carbohydrate transport and metabolism	--	--	G	Carbohydrate transport and metabolism	beta-galactosidase-like [Oncorhynchus mykiss]
gene46434	[R]	General function prediction only	Molecular Function: methyltransferase activity (GO:0008168);; Biological Process: methylation (GO:0032259);;	--	--	[R]	General function prediction only	Methyltransferase domain;; Methyltransferase domain;; Methyltransferase domain;; Methyltransferase domain;; Methyltransferase domain;; ubiE/COQ5 methyltransferase family	--	Q	Secondary metabolites biosynthesis, transport and catabolism	Williams-Beuren syndrome chromosomal region 27 protein [Oncorhynchus mykiss]
gene8359	--	--	Cellular Component: nucleus (GO:0005634);; Biological Process: regulation of transcription, DNA-templated (GO:0006355);; Biological Process: multicellular organism development (GO:0007275);; Molecular Function: enhancer binding (GO:0035326);;	K09293|0|mze:101470942|K09293 paired box protein 8 | (RefSeq) paired box protein Pax-8	--	[K]	Transcription	'Paired box' domain;; Paired-box protein 2 C terminal;; Homeodomain-like domain	Paired box protein Pax-8 (Fragment) OS=Xenopus tropicalis OX=8364 GN=pax8 PE=2 SV=2	K	Transcription	paired box protein Pax-8-like isoform X2 [Oncorhynchus kisutch]
gene24109	--	--	--	--	--	--	--	SOUL heme-binding protein	Heme-binding protein 1 OS=Xenopus laevis OX=8355 GN=hebp1 PE=2 SV=1	S	Function unknown	heme-binding protein 1-like [Oncorhynchus mykiss]
Oncorhynchus_mykiss_newGene_1944	[T]	Signal transduction mechanisms	Molecular Function: protein serine/threonine kinase activity (GO:0004674);; Molecular Function: ATP binding (GO:0005524);; Biological Process: protein phosphorylation (GO:0006468);;	K04456|4.1157e-149|mze:101480630|K04456 RAC serine/threonine-protein kinase [EC:2.7.11.1] | (RefSeq) akt2; RAC-beta serine/threonine-protein kinase	MAPK signaling pathway (ko04010);; ErbB signaling pathway (ko04012);; FoxO signaling pathway (ko04068);; mTOR signaling pathway (ko04150);; Apoptosis (ko04210);; Adrenergic signaling in cardiomyocytes (ko04261);; VEGF signaling pathway (ko04370);; Focal adhesion (ko04510);; Tight junction (ko04530);; Toll-like receptor signaling pathway (ko04620);; Insulin signaling pathway (ko04910);; Progestero…	[T]	Signal transduction mechanisms	Protein kinase domain;; Protein tyrosine kinase;; Protein kinase C terminal domain;; Kinase-like;; Transposase	RAC-beta serine/threonine-protein kinase A OS=Xenopus laevis OX=8355 GN=akt2-a PE=2 SV=1	T	Signal transduction mechanisms	unnamed protein product [Oncorhynchus mykiss]
gene19033	[M]	Cell wall/membrane/envelope biogenesis	--	--	--	[TV]	Signal transduction mechanisms;; Defense mechanisms	Lectin C-type domain;; Homeobox associated leucine zipper	Lactose-binding lectin l-2 OS=Anguilla japonica OX=7937 GN=l-2 PE=1 SV=2	S	Function unknown	CD209 antigen-like protein C, partial [Oncorhynchus mykiss]
gene8170	[NW]	Cell motility;; Extracellular structures	Molecular Function: metalloendopeptidase activity (GO:0004222);; Biological Process: proteolysis (GO:0006508);; Molecular Function: zinc ion binding (GO:0008270);;	--	--	[O]	Posttranslational modification, protein turnover, chaperones	Astacin (Peptidase family M12A)	Low choriolytic enzyme OS=Oryzias latipes OX=8090 GN=lce PE=1 SV=1	O	Posttranslational modification, protein turnover, chaperones	astacin-like metalloprotease toxin 5 isoform X1 [Oncorhynchus mykiss]
gene49892	--	--	--	K08622|4.93119e-108|dre:560364|K08622 a disintegrin and metalloproteinase with thrombospondin motifs 7 [EC:3.4.24.-] | (RefSeq) adamts7; ADAM metallopeptidase with thrombospondin type 1 motif 7	--	[O]	Posttranslational modification, protein turnover, chaperones	Thrombospondin type 1 domain;; Mucin-like	--	S	Function unknown	A disintegrin and metalloproteinase with thrombospondin motifs 7-like, partial [Oncorhynchus mykiss]
Oncorhynchus_mykiss_newGene_2994	--	--	--	--	--	--	--	--	--	--	--	PREDICTED: uncharacterized protein LOC109194839 isoform X2 [Oreochromis niloticus]
gene28940	[T]	Signal transduction mechanisms	Molecular Function: voltage-gated potassium channel activity (GO:0005249);; Cellular Component: voltage-gated potassium channel complex (GO:0008076);; Biological Process: regulation of ion transmembrane transport (GO:0034765);; Biological Process: protein homooligomerization (GO:0051260);; Biological Process: potassium ion transmembrane transport (GO:0071805);;	K04902|0|mze:101482462|K04902 potassium voltage-gated channel subfamily G member 3 | (RefSeq) potassium voltage-gated channel subfamily G member 3-like	--	[P]	Inorganic ion transport and metabolism	Ion transport protein;; BTB/POZ domain;; Ion channel	Potassium voltage-gated channel subfamily G member 2 OS=Gallus gallus OX=9031 GN=KCNG2 PE=2 SV=1	P	Inorganic ion transport and metabolism	potassium voltage-gated channel subfamily G member 3-like [Oncorhynchus mykiss]
gene53089	--	--	Molecular Function: GTP binding (GO:0005525);; Cellular Component: intracellular (GO:0005622);; Biological Process: small GTPase mediated signal transduction (GO:0007264);; Cellular Component: membrane (GO:0016020);; Molecular Function: hydrolase activity (GO:0016787);;	K07208|6.79968e-59|tru:101075993|K07208 Ras homolog enriched in brain | (RefSeq) rheb; Ras homolog enriched in brain	mTOR signaling pathway (ko04150);; Insulin signaling pathway (ko04910)	[R]	General function prediction only	Ras family;; Ras of Complex, Roc, domain of DAPkinase;; 50S ribosome-binding GTPase	Ras-related protein Rap-1b OS=Xenopus tropicalis OX=8364 GN=rap1b PE=2 SV=1	S	Function unknown	GTP-binding protein Rheb isoform X2 [Salvelinus alpinus]
gene44902	--	--	--	--	--	--	--	--	--	S	Function unknown	uncharacterized protein LOC110508646 [Oncorhynchus mykiss]
gene32456	--	--	Biological Process: cytoplasmic translation (GO:0002181);; Molecular Function: structural constituent of ribosome (GO:0003735);; Biological Process: translational elongation (GO:0006414);; Cellular Component: cytosolic large ribosomal subunit (GO:0022625);; Cellular Component: preribosome, large subunit precursor (GO:0030687);; Molecular Function: large ribosomal subunit rRNA binding (GO:0070180)…	K02943|6.52237e-29|tru:101075478|K02943 large subunit ribosomal protein LP2 | (RefSeq) rplp2; ribosomal protein lateral stalk subunit P2	Ribosome (ko03010)	[J]	Translation, ribosomal structure and biogenesis	60s Acidic ribosomal protein	--	J	Translation, ribosomal structure and biogenesis	60S acidic ribosomal protein P2-like isoform X1 [Oncorhynchus mykiss]
Oncorhynchus_mykiss_newGene_11514	[R]	General function prediction only	--	--	--	[R]	General function prediction only	Zinc-finger double domain;; Zinc finger, C2H2 type;; C2H2-type zinc finger;; C2H2-type zinc finger	Oocyte zinc finger protein XlCOF6 (Fragment) OS=Xenopus laevis OX=8355 PE=3 SV=1	S	Function unknown	zinc finger protein 239-like, partial [Oncorhynchus mykiss]
gene30518	--	--	Molecular Function: nucleic acid binding (GO:0003676);; Molecular Function: metal ion binding (GO:0046872);;	--	--	[R]	General function prediction only	Zinc-finger double domain;; C2H2-type zinc-finger domain;; Zinc finger, C2H2 type;; C2H2-type zinc finger;; C2H2-type zinc finger	Gastrula zinc finger protein XlCGF26.1 (Fragment) OS=Xenopus laevis OX=8355 PE=3 SV=1	S	Function unknown	zinc finger protein 335 isoform X1 [Oncorhynchus mykiss]
gene42041	--	--	--	--	--	--	--	FSIP1 family	Fibrous sheath-interacting protein 1 OS=Danio rerio OX=7955 GN=fsip1 PE=2 SV=1	S	Function unknown	fibrous sheath-interacting protein 1 isoform X1 [Oncorhynchus mykiss]
gene27570	[G]	Carbohydrate transport and metabolism	--	K00854|0|dre:393350|K00854 xylulokinase [EC:2.7.1.17] | (RefSeq) xylb, zgc:64119; xylulokinase homolog (H. influenzae)	Pentose and glucuronate interconversions (ko00040)	[G]	Carbohydrate transport and metabolism	FGGY family of carbohydrate kinases, N-terminal domain	--	G	Carbohydrate transport and metabolism	xylulose kinase [Oncorhynchus mykiss]
gene39801	--	--	Molecular Function: transcription factor activity, sequence-specific DNA binding (GO:0003700);; Cellular Component: nucleus (GO:0005634);; Biological Process: regulation of transcription, DNA-templated (GO:0006355);; Molecular Function: sequence-specific DNA binding (GO:0043565);;	--	--	--	--	--	--	K	Transcription	forkhead box protein L1-like [Oncorhynchus mykiss]
gene18461	--	--	Molecular Function: GTP binding (GO:0005525);; Cellular Component: intracellular (GO:0005622);; Biological Process: small GTPase mediated signal transduction (GO:0007264);;	K07935|2.50443e-91|mze:101487984|K07935 intraflagellar transport protein 22 | (RefSeq) ift22; intraflagellar transport 22	--	--	--	Ras of Complex, Roc, domain of DAPkinase;; Ras family	Intraflagellar transport protein 22 homolog OS=Danio rerio OX=7955 GN=ift22 PE=2 SV=1	S	Function unknown	intraflagellar transport protein 22 homolog [Oncorhynchus mykiss]
gene11126	--	--	Molecular Function: G-protein coupled receptor activity (GO:0004930);; Biological Process: G-protein coupled receptor signaling pathway (GO:0007186);; Cellular Component: integral component of membrane (GO:0016021);;	--	--	[T]	Signal transduction mechanisms	7 transmembrane receptor (rhodopsin family);; Serpentine type 7TM GPCR chemoreceptor Srx	Alpha-1A adrenergic receptor OS=Oryzias latipes OX=8090 GN=adra1a PE=3 SV=1	U	Intracellular trafficking, secretion, and vesicular transport	unnamed protein product [Oncorhynchus mykiss]
gene40846	--	--	--	K19404|7.89041e-75|lcm:102357225|K19404 phosphatidic acid-selective&#160;phospholipase A1 [EC:3.1.1.-] | (RefSeq) lipase member H-like	--	--	--	Lipase	Lipase member H-A OS=Xenopus laevis OX=8355 GN=liph-a PE=2 SV=1	O	Posttranslational modification, protein turnover, chaperones	lipase member I-like [Oncorhynchus mykiss]
gene21133	--	--	--	K12484|3.2651e-107|mze:101465789|K12484 Rab11 family-interacting protein 1/2/5 | (RefSeq) rab11fip1; RAB11 family interacting protein 1	Endocytosis (ko04144)	--	--	FIP domain;; C2 domain	--	S	Function unknown	protein MLP1-like [Oncorhynchus mykiss]
Oncorhynchus_mykiss_newGene_3003	--	--	Molecular Function: DNA binding (GO:0003677);; Biological Process: transposition, DNA-mediated (GO:0006313);; Biological Process: DNA integration (GO:0015074);;	--	--	--	--	Helix-turn-helix domain;; Winged helix-turn helix;; DDE superfamily endonuclease	--	--	--	unnamed protein product [Oncorhynchus mykiss]
gene34643	--	--	Molecular Function: zinc ion binding (GO:0008270);;	K13149|1.83243e-89|pss:102461152|K13149 integrator complex subunit 12 | (RefSeq) INTS12; integrator complex subunit 12	--	[R]	General function prediction only	PHD-finger	Integrator complex subunit 12 OS=Xenopus tropicalis OX=8364 GN=ints12 PE=2 SV=1	S	Function unknown	integrator complex subunit 12-like isoform X1 [Oncorhynchus mykiss]
gene12265	--	--	Cellular Component: integral component of membrane (GO:0016021);;	--	--	[X]	--	Myelin proteolipid protein (PLP or lipophilin)	Proteolipid protein DM gamma OS=Squalus acanthias OX=7797 PE=2 SV=1	U	Intracellular trafficking, secretion, and vesicular transport	unnamed protein product [Oncorhynchus mykiss]
gene38773	--	--	--	K20282|0|mze:101468995|K20282 GRIP and coiled-coil domain-containing protein 2 | (RefSeq) gcc2; GRIP and coiled-coil domain containing 2	--	[U]	Intracellular trafficking, secretion, and vesicular transport	Rab binding domain;; GRIP domain	--	U	Intracellular trafficking, secretion, and vesicular transport	GRIP and coiled-coil domain-containing protein 2-like [Oncorhynchus mykiss]
gene20281	--	--	Cellular Component: integral component of membrane (GO:0016021);; Molecular Function: ribosome binding (GO:0043022);;	--	--	[S]	Function unknown	LETM1-like protein	LETM1 domain-containing protein LETM2, mitochondrial OS=Xenopus tropicalis OX=8364 GN=letm2 PE=2 SV=1	S	Function unknown	LETM1 domain-containing protein LETM2, mitochondrial-like [Oncorhynchus mykiss]
Oncorhynchus_mykiss_newGene_37624	--	--	Molecular Function: microtubule motor activity (GO:0003777);; Molecular Function: ATP binding (GO:0005524);; Cellular Component: microtubule (GO:0005874);; Biological Process: microtubule-based movement (GO:0007018);; Molecular Function: microtubule binding (GO:0008017);;	K10396|2.57911e-84|ola:101155960|K10396 kinesin family member 5 | (RefSeq) kinesin-1 heavy chain	Endocytosis (ko04144)	[Z]	Cytoskeleton	--	--	Z	Cytoskeleton	PREDICTED: kinesin-1 heavy chain-like isoform X1 [Salmo salar]
gene36263	--	--	--	K19347|0|mze:101478415|K19347 SUN domain-containing protein 1/2 | (RefSeq) SUN domain-containing protein 1-like	--	[D]	Cell cycle control, cell division, chromosome partitioning	Sad1 / UNC-like C-terminal;; Mitochondrial RNA binding protein MRP	--	S	Function unknown	SUN domain-containing protein 1-like isoform X1 [Oncorhynchus mykiss]
gene5799	--	--	--	--	--	--	--	Cortactin-binding protein-2	Filamin A-interacting protein 1-like OS=Danio rerio OX=7955 GN=filip1l PE=2 SV=1	S	Function unknown	filamin A-interacting protein 1-like isoform X2 [Oncorhynchus mykiss]
Oncorhynchus_mykiss_newGene_33901	--	--	Biological Process: intra-Golgi vesicle-mediated transport (GO:0006891);; Cellular Component: Golgi transport complex (GO:0017119);;	K20295|3.66381e-170|tru:101065861|K20295 conserved oligomeric Golgi complex subunit 8 | (RefSeq) conserved oligomeric Golgi complex subunit 8-like	--	[U]	Intracellular trafficking, secretion, and vesicular transport	Dor1-like family;; Vps51/Vps67	--	S	Function unknown	conserved oligomeric Golgi complex subunit 8, partial [Oncorhynchus mykiss]
gene39709	--	--	Molecular Function: cysteine-type endopeptidase inhibitor activity (GO:0004869);; Cellular Component: extracellular region (GO:0005576);; Biological Process: negative regulation of endopeptidase activity (GO:0010951);;	K13899|1.51754e-37|mze:101488042|K13899 cystatin-C | (RefSeq) cystatin-like	--	--	--	Cystatin domain;; Aspartic acid proteinase inhibitor	Cystatin OS=Oncorhynchus mykiss OX=8022 PE=2 SV=1	O	Posttranslational modification, protein turnover, chaperones	unnamed protein product [Oncorhynchus mykiss]
gene41577	--	--	Molecular Function: cytokine activity (GO:0005125);; Molecular Function: cytokine receptor binding (GO:0005126);; Cellular Component: extracellular space (GO:0005615);; Biological Process: immune response (GO:0006955);; Biological Process: positive regulation of gene expression (GO:0010628);;	K05434|1.2933e-13|mze:105940966|K05434 interleukin 21 | (RefSeq) interleukin-21-like	Cytokine-cytokine receptor interaction (ko04060)	--	--	--	--	S	Function unknown	unnamed protein product [Oncorhynchus mykiss]
gene30197	--	--	Cellular Component: Golgi apparatus (GO:0005794);; Biological Process: transport (GO:0006810);;	K18739|0|ola:101171665|K18739 protein bicaudal D | (RefSeq) protein bicaudal D homolog 2-like	--	[U]	Intracellular trafficking, secretion, and vesicular transport	Microtubule-associated protein Bicaudal-D	--	U	Intracellular trafficking, secretion, and vesicular transport	protein bicaudal D homolog 2-like [Oncorhynchus mykiss]
gene37888	--	--	--	K12474|5.1035e-94|tru:105416852|K12474 low density lipoprotein receptor adapter protein 1 | (RefSeq) uncharacterized LOC105416852	Endocytosis (ko04144)	--	--	Phosphotyrosine interaction domain (PTB/PID)	--	--	--	uncharacterized protein LOC110500571 isoform X1 [Oncorhynchus mykiss]
gene7896	--	--	--	--	--	--	--	NACHT domain;; Leucine Rich repeat;; PAAD/DAPIN/Pyrin domain;; Fish-specific NACHT associated domain	Protein NLRC5 OS=Ictalurus punctatus OX=7998 GN=nlrc5 PE=2 SV=1	S	Function unknown	NACHT, LRR and PYD domains-containing protein 3-like [Oncorhynchus mykiss]
Oncorhynchus_mykiss_newGene_15199	--	--	--	--	--	--	--	--	Leucine-rich repeat-containing protein 28 OS=Xenopus tropicalis OX=8364 GN=lrrc28 PE=2 SV=1	S	Function unknown	PREDICTED: leucine-rich repeat-containing protein 28-like isoform X2 [Salmo salar]
gene37175	--	--	Cellular Component: integral component of plasma membrane (GO:0005887);; Biological Process: G-protein coupled acetylcholine receptor signaling pathway (GO:0007213);; Biological Process: regulation of heart contraction (GO:0008016);; Molecular Function: G-protein coupled acetylcholine receptor activity (GO:0016907);; Cellular Component: cell junction (GO:0030054);; Cellular Component: postsynapti…	K04130|0|xma:102225705|K04130 muscarinic acetylcholine receptor M2 | (RefSeq) muscarinic acetylcholine receptor M2-like	Calcium signaling pathway (ko04020);; Neuroactive ligand-receptor interaction (ko04080);; Regulation of actin cytoskeleton (ko04810)	[T]	Signal transduction mechanisms	7 transmembrane receptor (rhodopsin family)	Muscarinic acetylcholine receptor M2 OS=Gallus gallus OX=9031 GN=CHRM2 PE=3 SV=1	U	Intracellular trafficking, secretion, and vesicular transport	muscarinic acetylcholine receptor M2-like [Oncorhynchus mykiss]
Oncorhynchus_mykiss_newGene_59203	--	--	Molecular Function: 3-beta-hydroxy-delta5-steroid dehydrogenase activity (GO:0003854);; Biological Process: steroid biosynthetic process (GO:0006694);; Cellular Component: integral component of membrane (GO:0016021);; Biological Process: cell migration (GO:0016477);; Biological Process: oxidation-reduction process (GO:0055114);;	--	--	--	--	--	--	--	--	Fc receptor-like protein 4 [Oncorhynchus mykiss]
gene14250	--	--	Cellular Component: integral component of membrane (GO:0016021);;	--	--	--	--	Transmembrane protein 251	Transmembrane protein 251 OS=Danio rerio OX=7955 GN=tmem251 PE=2 SV=1	S	Function unknown	transmembrane protein 251 [Oncorhynchus mykiss]
gene49840	[R]	General function prediction only	--	--	--	[R]	General function prediction only	Zinc-finger double domain;; Zinc finger, C2H2 type;; C2H2-type zinc finger;; zinc-finger C2H2-type;; C2HE / C2H2 / C2HC zinc-binding finger;; C2H2-type zinc finger;; Zinc ribbon domain;; Phorbol esters/diacylglycerol binding domain (C1 domain);; Protein of unknown function (FYDLN_acid)	Oocyte zinc finger protein XlCOF6 (Fragment) OS=Xenopus laevis OX=8355 PE=3 SV=1	S	Function unknown	zinc finger protein 135-like [Oncorhynchus mykiss]
gene52488	--	--	Molecular Function: iron ion transmembrane transporter activity (GO:0005381);; Cellular Component: integral component of membrane (GO:0016021);; Biological Process: iron ion transmembrane transport (GO:0034755);;	K14685|9.89775e-141|mze:101469428|K14685 solute carrier family 40 (iron-regulated transporter), member 1 | (RefSeq) solute carrier family 40 member 1-like	--	[P]	Inorganic ion transport and metabolism	Ferroportin1 (FPN1)	Solute carrier family 40 member 1 OS=Danio rerio OX=7955 GN=slc40a1 PE=2 SV=2	U	Intracellular trafficking, secretion, and vesicular transport	solute carrier family 40 member 1-like [Oncorhynchus mykiss]
gene50395	--	--	Biological Process: rRNA processing (GO:0006364);; Cellular Component: small-subunit processome (GO:0032040);;	K14555|3.54382e-18|mze:101474429|K14555 U3 small nucleolar RNA-associated protein 13 | (RefSeq) tbl3; transducin beta like 3	Ribosome biogenesis in eukaryotes (ko03008)	--	--	--	--	S	Function unknown	acidic leucine-rich nuclear phosphoprotein 32 family member B-like [Oncorhynchus mykiss]
gene29718	--	--	Biological Process: regulation of cell growth (GO:0001558);; Molecular Function: integrin binding (GO:0005178);; Molecular Function: insulin-like growth factor binding (GO:0005520);; Cellular Component: proteinaceous extracellular matrix (GO:0005578);; Biological Process: cell adhesion (GO:0007155);; Biological Process: signal transduction (GO:0007165);; Biological Process: cell-cell signaling (G…	--	--	--	--	Insulin-like growth factor binding protein;; von Willebrand factor type C domain;; Cystine-knot domain	Protein NOV OS=Gallus gallus OX=9031 GN=NOV PE=2 SV=1	S	Function unknown	WNT1-inducible-signaling pathway protein 2-like [Oncorhynchus mykiss]
Oncorhynchus_mykiss_newGene_6338	--	--	Biological Process: phosphoenolpyruvate-dependent sugar phosphotransferase system (GO:0009401);; Cellular Component: integral component of membrane (GO:0016021);; Molecular Function: semaphorin receptor activity (GO:0017154);; Biological Process: semaphorin-plexin signaling pathway (GO:0071526);;	K06821|1.30374e-56|mze:101481412|K06821 plexin B | (RefSeq) plexin-B2-like	--	--	--	IPT/TIG domain	--	U	Intracellular trafficking, secretion, and vesicular transport	plexin-B2-like [Oncorhynchus mykiss]
gene39818	--	--	Biological Process: ubiquitin-dependent protein catabolic process (GO:0006511);; Biological Process: protein deubiquitination (GO:0016579);; Molecular Function: thiol-dependent ubiquitinyl hydrolase activity (GO:0036459);;	K11855|0|xma:102237818|K11855 ubiquitin carboxyl-terminal hydrolase 36/42 [EC:3.4.19.12] | (RefSeq) usp42; ubiquitin specific peptidase 42	--	[O]	Posttranslational modification, protein turnover, chaperones	Ubiquitin carboxyl-terminal hydrolase;; Ubiquitin carboxyl-terminal hydrolase	Ubiquitin carboxyl-terminal hydrolase 22 OS=Danio rerio OX=7955 GN=usp22 PE=2 SV=1	O	Posttranslational modification, protein turnover, chaperones	ubiquitin carboxyl-terminal hydrolase 42-like [Oncorhynchus mykiss]
gene33297	--	--	Molecular Function: protein dimerization activity (GO:0046983);;	K09075|1.57855e-37|tru:101069975|K09075 nescient helix-loop-helix protein | (RefSeq) helix-loop-helix protein 2-like	--	[K]	Transcription	Helix-loop-helix DNA-binding domain	--	K	Transcription	PREDICTED: helix-loop-helix protein 2-like [Salmo salar]
Oncorhynchus_mykiss_newGene_49131	[X]	--	Cellular Component: integral component of membrane (GO:0016021);;	--	--	--	--	Reverse transcriptase (RNA-dependent DNA polymerase)	NXPE family member 3 OS=Danio rerio OX=7955 GN=nxpe3 PE=2 SV=1	S	Function unknown	unnamed protein product [Oncorhynchus mykiss]
gene2524	--	--	Cellular Component: integral component of membrane (GO:0016021);;	--	--	--	--	Immunoglobulin I-set domain	--	S	Function unknown	uncharacterized protein LOC110488747 [Oncorhynchus mykiss]
gene18766	[R]	General function prediction only	Molecular Function: binding (GO:0005488);;	--	--	[R]	General function prediction only	Zinc-finger double domain;; Zinc finger, C2H2 type;; C2H2-type zinc finger;; LYAR-type C2HC zinc finger	Oocyte zinc finger protein XlCOF20 (Fragment) OS=Xenopus laevis OX=8355 PE=3 SV=1	S	Function unknown	zinc finger protein 583-like [Oncorhynchus mykiss]
gene49659	[I]	Lipid transport and metabolism	Molecular Function: acyl-CoA dehydrogenase activity (GO:0003995);; Molecular Function: flavin adenine dinucleotide binding (GO:0050660);; Biological Process: oxidation-reduction process (GO:0055114);;	--	--	[EI]	Amino acid transport and metabolism;; Lipid transport and metabolism	Acyl-CoA dehydrogenase, C-terminal domain	--	I	Lipid transport and metabolism	long-chain specific acyl-CoA dehydrogenase, mitochondrial-like [Oncorhynchus mykiss]
gene28229	[EH]	Amino acid transport and metabolism;; Coenzyme transport and metabolism	Cellular Component: mitochondrion (GO:0005739);; Biological Process: aspartate biosynthetic process (GO:0006532);; Biological Process: leucine biosynthetic process (GO:0009098);; Biological Process: valine biosynthetic process (GO:0009099);; Molecular Function: pyridoxal phosphate binding (GO:0030170);; Molecular Function: L-leucine transaminase activity (GO:0052654);; Molecular Function: L-valin…	K00826|0|dre:337412|K00826 branched-chain amino acid aminotransferase [EC:2.6.1.42] | (RefSeq) bcat1, fj66g02, wu:fj66g02, zgc:73157; branched chain amino-acid transaminase 1, cytosolic	Cysteine and methionine metabolism (ko00270);; Valine, leucine and isoleucine degradation (ko00280);; Valine, leucine and isoleucine biosynthesis (ko00290);; Pantothenate and CoA biosynthesis (ko00770);; 2-Oxocarboxylic acid metabolism (ko01210);; Biosynthesis of amino acids (ko01230)	[E]	Amino acid transport and metabolism	Amino-transferase class IV	--	E	Amino acid transport and metabolism	branched-chain-amino-acid aminotransferase, cytosolic [Oncorhynchus mykiss]
gene31339	--	--	--	--	--	--	--	SERTA motif	--	K	Transcription	SERTA domain-containing protein 2-like [Oncorhynchus mykiss]
gene36576	[T]	Signal transduction mechanisms	--	K09095|0|dre:555192|K09095 hypoxia-inducible factor 2 alpha | (RefSeq) epas1b, epas1, wu:fq36f01; endothelial PAS domain protein 1b	--	[TK]	Signal transduction mechanisms;; Transcription	PAS fold;; PAS domain;; Hypoxia-inducible factor-1;; PAS fold;; PAS domain;; PAS fold	Hypoxia-inducible factor 1-alpha OS=Gallus gallus OX=9031 GN=HIF1A PE=2 SV=2	K	Transcription	endothelial PAS domain-containing protein 1 [Oncorhynchus mykiss]
gene28375	--	--	Biological Process: chemical synaptic transmission (GO:0007268);; Molecular Function: melanin-concentrating hormone activity (GO:0030354);;	K05229|8.03606e-22|mze:101477262|K05229 pro-melanin-concentrating hormone | (RefSeq) pro-MCH 2-like	--	--	--	--	--	U	Intracellular trafficking, secretion, and vesicular transport	uncharacterized protein LOC110490424 isoform X1 [Oncorhynchus mykiss]
Oncorhynchus_mykiss_newGene_5112	--	--	--	--	--	--	--	--	--	--	--	transcriptional regulator ATRX-like [Oncorhynchus mykiss]
gene1625	--	--	Molecular Function: DNA binding (GO:0003677);; Cellular Component: nucleus (GO:0005634);; Biological Process: regulation of transcription, DNA-templated (GO:0006355);; Biological Process: multicellular organism development (GO:0007275);; Molecular Function: metal ion binding (GO:0046872);;	--	--	[K]	Transcription	Transcription factor COE1 DNA-binding domain	Transcription factor COE3 OS=Xenopus laevis OX=8355 GN=coe3 PE=2 SV=2	S	Function unknown	transcription factor COE3-like, partial [Oncorhynchus kisutch]
gene6301	--	--	Cellular Component: troponin complex (GO:0005861);;	--	--	[Z]	Cytoskeleton	Troponin	Troponin I, fast skeletal muscle OS=Coturnix japonica OX=93934 GN=TNNI2 PE=3 SV=2	Z	Cytoskeleton	troponin I, fast skeletal muscle-like [Oncorhynchus mykiss]
gene42493	--	--	--	--	--	--	--	FAM150 family	--	O	Posttranslational modification, protein turnover, chaperones	ALK and LTK ligand 2-like [Oncorhynchus mykiss]
gene5729	--	--	Cellular Component: integral component of membrane (GO:0016021);;	--	--	--	--	Immunoglobulin V-set domain;; Immunoglobulin domain;; Immunoglobulin I-set domain;; Immunoglobulin domain	--	--	--	uncharacterized protein LOC110520453 [Oncorhynchus mykiss]
gene55273	--	--	Cellular Component: endoplasmic reticulum membrane (GO:0005789);; Biological Process: transport (GO:0006810);; Cellular Component: integral component of membrane (GO:0016021);;	K20348|1.33605e-52|mze:101485390|K20348 p24 family protein gamma-1 | (RefSeq) transmembrane emp24 domain-containing protein 1-like	--	[U]	Intracellular trafficking, secretion, and vesicular transport	emp24/gp25L/p24 family/GOLD	Transmembrane emp24 domain-containing protein 1 OS=Xenopus tropicalis OX=8364 GN=tmed1 PE=2 SV=1	U	Intracellular trafficking, secretion, and vesicular transport	transmembrane emp24 domain-containing protein 1-like [Oncorhynchus mykiss]
Oncorhynchus_mykiss_newGene_365	--	--	Molecular Function: DNA binding (GO:0003677);; Biological Process: transposition, DNA-mediated (GO:0006313);; Biological Process: DNA integration (GO:0015074);; Cellular Component: integral component of membrane (GO:0016021);;	--	--	--	--	DDE superfamily endonuclease;; Transposase	--	S	Function unknown	unnamed protein product [Oncorhynchus mykiss]
gene50617	--	--	--	K14617|4.40094e-87|mze:101481761|K14617 LMBR1 domain-containing protein 1 | (RefSeq) lmbrd1; LMBR1 domain containing 1	--	--	--	LMBR1-like membrane protein	Probable lysosomal cobalamin transporter OS=Danio rerio OX=7955 GN=lmbrd1 PE=2 SV=1	U	Intracellular trafficking, secretion, and vesicular transport	PREDICTED: probable lysosomal cobalamin transporter [Salmo salar]
gene41225	--	--	Cellular Component: membrane (GO:0016020);;	--	--	--	--	--	--	--	--	uncharacterized protein LOC110504771 [Oncorhynchus mykiss]
gene5845	[R]	General function prediction only	--	--	--	[A]	RNA processing and modification	Lysine methyltransferase;; Methyltransferase domain	Protein N-lysine methyltransferase METTL21A OS=Xenopus tropicalis OX=8364 GN=mettl21a PE=2 SV=1	S	Function unknown	protein-lysine methyltransferase METTL21C-like [Oncorhynchus mykiss]
gene4415	[ET]	Amino acid transport and metabolism;; Signal transduction mechanisms	--	K05212|0|tru:101079593|K05212 glutamate receptor ionotropic, NMDA 2D | (RefSeq) glutamate receptor ionotropic, NMDA 2D-like	Calcium signaling pathway (ko04020);; Neuroactive ligand-receptor interaction (ko04080)	[PET]	Inorganic ion transport and metabolism;; Amino acid transport and metabolism;; Signal transduction mechanisms	Ligated ion channel L-glutamate- and glycine-binding site;; Bacterial extracellular solute-binding proteins, family 3;; Receptor family ligand binding region	Glutamate receptor ionotropic, NMDA 2A OS=Xenopus laevis OX=8355 GN=grin2a PE=1 SV=1	U	Intracellular trafficking, secretion, and vesicular transport	glutamate receptor ionotropic, NMDA 2D-like [Oncorhynchus mykiss]
gene45707	--	--	--	K10429|0|mze:101470400|K10429 microtubule-associated protein 1 | (RefSeq) map1b; microtubule associated protein 1B	--	[Z]	Cytoskeleton	--	Electromotor neuron-associated protein 1 (Fragment) OS=Tetronarce californica OX=7787 PE=2 SV=1	S	Function unknown	microtubule-associated protein 1B-like [Oncorhynchus mykiss]
gene34991	--	--	--	--	--	--	--	Calcineurin-binding protein (Calsarcin)	--	O	Posttranslational modification, protein turnover, chaperones	myozenin-2-like [Oncorhynchus mykiss]
Oncorhynchus_mykiss_newGene_22533	--	--	--	--	--	--	--	--	--	--	--	uncharacterized protein LOC110498250, partial [Oncorhynchus mykiss]
gene16700	[X]	--	--	K06761|0|ola:101160409|K06761 contactin 3 | (RefSeq) contactin-3-like	--	[T]	Signal transduction mechanisms	Immunoglobulin domain;; Immunoglobulin I-set domain;; Immunoglobulin domain;; Immunoglobulin domain;; Fibronectin type III domain;; Immunoglobulin V-set domain;; CD80-like C2-set immunoglobulin domain	Contactin-5 OS=Gallus gallus OX=9031 GN=CNTN5 PE=1 SV=1	S	Function unknown	contactin-3-like [Oncorhynchus mykiss]
gene28448	--	--	Cellular Component: intracellular (GO:0005622);; Molecular Function: zinc ion binding (GO:0008270);;	K12012|0|xma:102238383|K12012 tripartite motif-containing protein 35 | (RefSeq) tripartite motif-containing protein 35-like	--	[O]	Posttranslational modification, protein turnover, chaperones	SPRY-associated domain;; SPRY domain;; RING-type zinc-finger;; Zinc finger, C3HC4 type (RING finger);; zinc finger of C3HC4-type, RING;; Zinc finger, C3HC4 type (RING finger);; Zinc finger, C3HC4 type (RING finger);; B-box zinc finger	Zinc-binding protein A33 OS=Pleurodeles waltl OX=8319 PE=1 SV=2	S	Function unknown	tripartite motif-containing protein 35-like isoform X1 [Oncorhynchus mykiss]
Oncorhynchus_mykiss_newGene_19357	--	--	Biological Process: activation of MAPKK activity (GO:0000186);; Molecular Function: MAP kinase kinase kinase activity (GO:0004709);; Molecular Function: ATP binding (GO:0005524);; Cellular Component: intracellular (GO:0005622);; Cellular Component: membrane (GO:0016020);;	--	--	--	--	--	--	S	Function unknown	Tc1-like transporase [Oncorhynchus mykiss]
gene34610	--	--	Molecular Function: nucleic acid binding (GO:0003676);; Molecular Function: metal ion binding (GO:0046872);;	--	--	[R]	General function prediction only	Zinc-finger double domain;; Zinc finger, C2H2 type;; C2H2-type zinc finger	Gastrula zinc finger protein XlCGF8.2DB (Fragment) OS=Xenopus laevis OX=8355 PE=3 SV=1	S	Function unknown	B-cell CLL/lymphoma 6 member B protein-like [Oncorhynchus mykiss]
gene34607	--	--	Molecular Function: nucleic acid binding (GO:0003676);; Molecular Function: metal ion binding (GO:0046872);;	--	--	[R]	General function prediction only	Zinc-finger double domain;; Zinc finger, C2H2 type;; C2H2-type zinc finger	Oocyte zinc finger protein XlCOF6.1 (Fragment) OS=Xenopus laevis OX=8355 PE=3 SV=1	S	Function unknown	Krueppel-like factor 12 isoform X1 [Oncorhynchus mykiss]
gene42932	--	--	Biological Process: ribosome biogenesis (GO:0042254);;	K02896|1.07607e-87|xma:102235760|K02896 large subunit ribosomal protein L24e | (RefSeq) rsl24d1; ribosomal L24 domain containing 1	Ribosome (ko03010)	[J]	Translation, ribosomal structure and biogenesis	Ribosomal protein L24e	Probable ribosome biogenesis protein RLP24 OS=Danio rerio OX=7955 GN=rsl24d1 PE=2 SV=1	J	Translation, ribosomal structure and biogenesis	probable ribosome biogenesis protein RLP24 [Oncorhynchus kisutch]
Oncorhynchus_mykiss_newGene_26783	--	--	--	--	--	[S]	Function unknown	--	UPF0668 protein C10orf76 homolog OS=Danio rerio OX=7955 GN=zgc:63733 PE=2 SV=2	S	Function unknown	PREDICTED: UPF0668 protein C10orf76 homolog [Salmo salar]
gene38867	[G]	Carbohydrate transport and metabolism	--	K20049|0|mze:101476190|K20049 low-density lipoprotein receptor-related protein 1B | (RefSeq) lrp1b; LDL receptor related protein 1B	--	[T]	Signal transduction mechanisms	Low-density lipoprotein receptor domain class A;; Low-density lipoprotein receptor repeat class B;; Coagulation Factor Xa inhibitory site;; SMP-30/Gluconolaconase/LRE-like region;; Domain of unknown function (DUF5050);; Complement Clr-like EGF-like;; Calcium-binding EGF domain;; Low-density lipoprotein receptor domain class A;; Low-density lipoprotein receptor repeat class B;; Coagulation Factor …	Low-density lipoprotein receptor-related protein 1 OS=Gallus gallus OX=9031 GN=LRP1 PE=2 SV=1	S	Function unknown	LOW QUALITY PROTEIN: low-density lipoprotein receptor-related protein 1B-like [Oncorhynchus mykiss]
gene25353	--	--	Cellular Component: integral component of membrane (GO:0016021);;	--	--	--	--	TMC domain	Transmembrane channel-like protein 7 OS=Gallus gallus OX=9031 GN=Tmc7 PE=2 SV=1	U	Intracellular trafficking, secretion, and vesicular transport	transmembrane channel-like protein 6 [Oncorhynchus mykiss]
gene1304	[I]	Lipid transport and metabolism	Cellular Component: integral component of membrane (GO:0016021);; Molecular Function: sphingolipid delta-4 desaturase activity (GO:0042284);; Biological Process: ceramide biosynthetic process (GO:0046513);; Biological Process: oxidation-reduction process (GO:0055114);;	K04712|0|mze:101475928|K04712 sphingolipid Delta-4 desaturase [EC:1.14.-.-] | (RefSeq) degs1; delta 4-desaturase, sphingolipid 1	Sphingolipid metabolism (ko00600)	[I]	Lipid transport and metabolism	Fatty acid desaturase;; Sphingolipid Delta4-desaturase (DES)	Sphingolipid delta(4)-desaturase DES1 OS=Gallus gallus OX=9031 GN=DEGS1 PE=2 SV=1	I	Lipid transport and metabolism	sphingolipid delta(4)-desaturase DES1-like [Oncorhynchus mykiss]
gene29007	--	--	Biological Process: ubiquitin-dependent protein catabolic process (GO:0006511);; Molecular Function: zinc ion binding (GO:0008270);; Biological Process: protein deubiquitination (GO:0016579);; Molecular Function: thiol-dependent ubiquitinyl hydrolase activity (GO:0036459);;	K11366|0|mze:101485380|K11366 ubiquitin carboxyl-terminal hydrolase 22/27/51 [EC:3.4.19.12] | (RefSeq) ubiquitin carboxyl-terminal hydrolase 22-like	--	[O]	Posttranslational modification, protein turnover, chaperones	Ubiquitin carboxyl-terminal hydrolase;; Ubiquitin carboxyl-terminal hydrolase;; Zn-finger in ubiquitin-hydrolases and other protein	Ubiquitin carboxyl-terminal hydrolase 22 OS=Danio rerio OX=7955 GN=usp22 PE=2 SV=1	O	Posttranslational modification, protein turnover, chaperones	ubiquitin carboxyl-terminal hydrolase 22 [Oncorhynchus mykiss]
gene26949	[O]	Posttranslational modification, protein turnover, chaperones	Cellular Component: nuclear chromatin (GO:0000790);; Biological Process: in utero embryonic development (GO:0001701);; Cellular Component: XY body (GO:0001741);; Molecular Function: ATP binding (GO:0005524);; Cellular Component: cytosol (GO:0005829);; Biological Process: postreplication repair (GO:0006301);; Biological Process: positive regulation of cell proliferation (GO:0008284);; Biological P…	K10573|2.29301e-108|ocu:100339096|K10573 ubiquitin-conjugating enzyme E2 A [EC:2.3.2.23] | (RefSeq) UBE2A; ubiquitin conjugating enzyme E2 A	Ubiquitin mediated proteolysis (ko04120)	[O]	Posttranslational modification, protein turnover, chaperones	Ubiquitin-conjugating enzyme	Ubiquitin-conjugating enzyme E2 D4 OS=Xenopus laevis OX=8355 GN=ube2d4 PE=1 SV=1	O	Posttranslational modification, protein turnover, chaperones	PREDICTED: LOW QUALITY PROTEIN: ubiquitin-conjugating enzyme E2 A [Stegastes partitus]
gene28198	--	--	--	K04608|0|mze:101467017|K04608 metabotropic glutamate receptor 6/7/8 | (RefSeq) metabotropic glutamate receptor 8-like	Neuroactive ligand-receptor interaction (ko04080)	[PT]	Inorganic ion transport and metabolism;; Signal transduction mechanisms	7 transmembrane sweet-taste receptor of 3 GCPR;; Receptor family ligand binding region;; Nine Cysteines Domain of family 3 GPCR	G-protein coupled receptor family C group 6 member A OS=Danio rerio OX=7955 GN=gprc6a PE=1 SV=1	U	Intracellular trafficking, secretion, and vesicular transport	metabotropic glutamate receptor 8-like [Oncorhynchus mykiss]
Oncorhynchus_mykiss_newGene_37134	--	--	--	--	--	--	--	Immunoglobulin V-set domain	--	S	Function unknown	unnamed protein product [Oncorhynchus mykiss]
Oncorhynchus_mykiss_newGene_45350	--	--	--	--	--	--	--	--	--	--	--	unnamed protein product [Oncorhynchus mykiss]
gene35640	--	--	Molecular Function: inositol-1,4,5-trisphosphate 3-kinase activity (GO:0008440);; Biological Process: phosphorylation (GO:0016310);;	K00911|0|mze:101475297|K00911 1D-myo-inositol-triphosphate 3-kinase [EC:2.7.1.127] | (RefSeq) itpka; inositol-trisphosphate 3-kinase A	Inositol phosphate metabolism (ko00562);; Calcium signaling pathway (ko04020);; Phosphatidylinositol signaling system (ko04070)	[I]	Lipid transport and metabolism	Inositol polyphosphate kinase	--	I	Lipid transport and metabolism	inositol-trisphosphate 3-kinase A-like isoform X1 [Oncorhynchus mykiss]
gene20110	[O]	Posttranslational modification, protein turnover, chaperones	Biological Process: protein polyubiquitination (GO:0000209);; Molecular Function: ubiquitin-protein transferase activity (GO:0004842);; Molecular Function: ATP binding (GO:0005524);; Biological Process: ubiquitin-dependent protein catabolic process (GO:0006511);; Biological Process: positive regulation of protein ubiquitination (GO:0031398);; Molecular Function: mitogen-activated protein kinase k…	K06689|7.10069e-99|ssc:100524597|K06689 ubiquitin-conjugating enzyme E2 D [EC:2.3.2.23] | (RefSeq) UBE2D4; ubiquitin conjugating enzyme E2 D4 (putative)	Ubiquitin mediated proteolysis (ko04120);; Protein processing in endoplasmic reticulum (ko04141)	[O]	Posttranslational modification, protein turnover, chaperones	Ubiquitin-conjugating enzyme	Ubiquitin-conjugating enzyme E2 D4 OS=Xenopus laevis OX=8355 GN=ube2d4 PE=1 SV=1	O	Posttranslational modification, protein turnover, chaperones	ubiquitin-conjugating enzyme E2 D4 [Danio rerio]
gene4444	[T]	Signal transduction mechanisms	Molecular Function: calcium channel activity (GO:0005262);; Cellular Component: integral component of membrane (GO:0016021);; Cellular Component: apical part of cell (GO:0045177);; Biological Process: calcium ion transmembrane transport (GO:0070588);;	K04975|0|tru:446000|K04975 transient receptor potential cation channel subfamily V member 6 | (RefSeq) trpv6, CaT, ECaC; transient receptor potential cation channel, subfamily V, member 6	--	[PT]	Inorganic ion transport and metabolism;; Signal transduction mechanisms	Ankyrin repeats (3 copies);; Ankyrin repeats (many copies);; Ankyrin repeat;; Ion transport protein;; Ankyrin repeat;; Ankyrin repeats (many copies)	Transient receptor potential cation channel subfamily V member 4 OS=Gallus gallus OX=9031 GN=TRPV4 PE=1 SV=1	P	Inorganic ion transport and metabolism	transient receptor potential cation channel subfamily V member 6-like [Oncorhynchus mykiss]
Oncorhynchus_mykiss_newGene_2873	--	--	Molecular Function: nucleic acid binding (GO:0003676);; Molecular Function: ubiquitin-protein transferase activity (GO:0004842);; Cellular Component: nucleus (GO:0005634);; Molecular Function: zinc ion binding (GO:0008270);; Biological Process: protein ubiquitination (GO:0016567);; Molecular Function: ligase activity (GO:0016874);;	--	--	[O]	Posttranslational modification, protein turnover, chaperones	DWNN domain	--	S	Function unknown	Retinoblastoma-binding protein 6 [Salmo salar]
gene28313	--	--	Molecular Function: Rho guanyl-nucleotide exchange factor activity (GO:0005089);; Cellular Component: intracellular (GO:0005622);; Biological Process: regulation of Rho protein signal transduction (GO:0035023);; Biological Process: positive regulation of GTPase activity (GO:0043547);;	K20683|0|xma:102231352|K20683 Rho guanine nucleotide exchange factor 3/8 | (RefSeq) net1; neuroepithelial cell transforming 1	--	[T]	Signal transduction mechanisms	RhoGEF domain;; Pleckstrin homology domain;; PH domain	Rho guanine nucleotide exchange factor 3 OS=Gallus gallus OX=9031 GN=Arhgef3 PE=2 SV=1	T	Signal transduction mechanisms	neuroepithelial cell-transforming gene 1 protein-like [Oncorhynchus mykiss]
gene53900	--	--	Molecular Function: zinc ion binding (GO:0008270);;	K09188|1.65499e-51|tru:101071853|K09188 histone-lysine N-methyltransferase MLL3 [EC:2.1.1.43] | (RefSeq) histone-lysine N-methyltransferase 2C-like	Lysine degradation (ko00310)	[R]	General function prediction only	PHD-finger	PHD finger protein 10 OS=Danio rerio OX=7955 GN=phf10 PE=2 SV=2	S	Function unknown	histone-lysine N-methyltransferase 2C-like [Oncorhynchus mykiss]
gene34633	[T]	Signal transduction mechanisms	Molecular Function: kinase activity (GO:0016301);; Biological Process: phosphorylation (GO:0016310);;	K04685|9.32529e-46|xma:102224758|K04685 cyclin-dependent kinase inhibitor 2B | (RefSeq) cdkn2b, CDNK2X, cdkn2a/b; cyclin dependent kinase inhibitor 2B	FoxO signaling pathway (ko04068);; Cell cycle (ko04110);; TGF-beta signaling pathway (ko04350)	[R]	General function prediction only	Ankyrin repeats (3 copies);; Ankyrin repeats (many copies);; Ankyrin repeats (many copies);; Ankyrin repeat;; Ankyrin repeat	Inversin OS=Danio rerio OX=7955 GN=invs PE=2 SV=1	S	Function unknown	cyclin-dependent kinase 4 inhibitor B-like [Oncorhynchus mykiss]
Oncorhynchus_mykiss_newGene_49599	--	--	Molecular Function: protein kinase activity (GO:0004672);;	K04421|2.95796e-12|mze:101475626|K04421 mitogen-activated protein kinase kinase kinase 3 [EC:2.7.11.25] | (RefSeq) mitogen-activated protein kinase kinase kinase 3-like	MAPK signaling pathway (ko04010);; GnRH signaling pathway (ko04912)	--	--	--	--	T	Signal transduction mechanisms	PREDICTED: mitogen-activated protein kinase kinase kinase 3-like [Salmo salar]
gene36382	--	--	Molecular Function: transcription factor activity, sequence-specific DNA binding (GO:0003700);; Cellular Component: nucleus (GO:0005634);; Biological Process: regulation of transcription, DNA-templated (GO:0006355);; Biological Process: multicellular organism development (GO:0007275);; Molecular Function: sequence-specific DNA binding (GO:0043565);;	K09305|5.86258e-139|tru:101079873|K09305 homeobox protein HoxA/B/C5 | (RefSeq) hoxb5b; homeobox protein Hox-B5b	--	[R]	General function prediction only	Homeobox domain	Homeobox protein Hox-B5b OS=Takifugu rubripes OX=31033 GN=hoxb5b PE=3 SV=1	K	Transcription	homeobox protein Hox-B5b-like [Oncorhynchus mykiss]
gene12751	[K]	Transcription	Cellular Component: integral component of membrane (GO:0016021);;	--	--	[R]	General function prediction only	Leucine rich repeat;; Leucine Rich repeats (2 copies);; Leucine rich repeats (6 copies);; Leucine-rich repeat;; Immunoglobulin I-set domain;; Immunoglobulin domain;; Immunoglobulin domain;; Immunoglobulin domain;; Immunoglobulin V-set domain;; Leucine Rich Repeat	Leucine-rich repeat and immunoglobulin-like domain-containing nogo receptor-interacting protein 1-B OS=Danio rerio OX=7955 GN=lingo1b PE=1 SV=1	S	Function unknown	leucine-rich repeat neuronal protein 1-like [Oncorhynchus mykiss]
Oncorhynchus_mykiss_newGene_39647	--	--	--	--	--	--	--	--	--	--	--	hypothetical protein XENTR_v90013177mg [Xenopus tropicalis]
gene24263	--	--	--	--	--	[R]	General function prediction only	Zinc finger, C2H2 type;; C2H2-type zinc finger;; Zinc-finger double-stranded RNA-binding;; C2H2-type zinc finger;; Zinc-finger double domain	Zinc finger protein Xfin OS=Xenopus laevis OX=8355 PE=1 SV=1	S	Function unknown	zinc finger protein 850-like isoform X3 [Oncorhynchus mykiss]
gene41136	--	--	--	--	--	--	--	HOOK protein	Daple-like protein OS=Xenopus laevis OX=8355 GN=ccdc88c PE=1 SV=1	S	Function unknown	daple-like protein [Oncorhynchus mykiss]
gene16756	--	--	--	K15348|0|mze:101487243|K15348 pleckstrin homology domain-containing family M member 2 | (RefSeq) plekhm2; pleckstrin homology and RUN domain containing M2	Salmonella infection (ko05132)	--	--	RUN domain;; PH domain	--	S	Function unknown	pleckstrin homology domain-containing family M member 2-like isoform X1 [Oncorhynchus mykiss]
gene6685	[K]	Transcription	Cellular Component: integral component of membrane (GO:0016021);;	--	--	[R]	General function prediction only	Pannexin-like TM region of LRRC8;; Leucine rich repeat;; Leucine Rich repeats (2 copies)	Volume-regulated anion channel subunit LRRC8E OS=Xenopus tropicalis OX=8364 GN=lrrc8e PE=2 SV=1	S	Function unknown	unnamed protein product [Oncorhynchus mykiss]
Oncorhynchus_mykiss_newGene_5401	--	--	Molecular Function: DNA binding (GO:0003677);; Molecular Function: motor activity (GO:0003774);; Molecular Function: ATP binding (GO:0005524);; Biological Process: transposition, DNA-mediated (GO:0006313);; Biological Process: DNA integration (GO:0015074);; Cellular Component: myosin complex (GO:0016459);;	--	--	--	--	Transposase	--	S	Function unknown	TC1-like transposase [Cyprinus carpio]
gene4045	--	--	Molecular Function: nucleic acid binding (GO:0003676);; Molecular Function: metal ion binding (GO:0046872);;	K09219|1.41926e-158|dre:541533|K09219 scratch | (RefSeq) scrt1b, zgc:113646; scratch family zinc finger 1b	--	[K]	Transcription	Zinc finger, C2H2 type;; C2H2-type zinc finger;; Zinc-finger double domain;; C2H2-type zinc finger;; Zinc-finger double-stranded RNA-binding;; Zinc-finger of C2H2 type	Zinc finger protein SNAI2 OS=Xenopus laevis OX=8355 GN=snai2 PE=1 SV=1	S	Function unknown	transcriptional repressor scratch 1-like isoform X1 [Oncorhynchus mykiss]
gene5444	[J]	Translation, ribosomal structure and biogenesis	Molecular Function: NAD+ ADP-ribosyltransferase activity (GO:0003950);;	K15261|0|dre:100148704|K15261 poly [ADP-ribose] polymerase 10/14/15 [EC:2.4.2.30] | (RefSeq) poly [ADP-ribose] polymerase 14	--	--	--	Macro domain;; Poly(ADP-ribose) polymerase catalytic domain;; WWE domain	O-acetyl-ADP-ribose deacetylase MACROD2 OS=Xenopus laevis OX=8355 GN=macrod2 PE=2 SV=1	S	Function unknown	poly [ADP-ribose] polymerase 14-like isoform X1 [Oncorhynchus mykiss]
gene17766	--	--	Biological Process: intracellular protein transport (GO:0006886);; Molecular Function: protein transporter activity (GO:0008565);; Biological Process: vesicle-mediated transport (GO:0016192);; Cellular Component: clathrin adaptor complex (GO:0030131);;	K11825|0|dre:334632|K11825 AP-2 complex subunit beta-1 | (RefSeq) ap2b1, fa16e07, wu:fa16c06, wu:fa16e07, wu:fc18c08, zgc:55659; adaptor-related protein complex 2, beta 1 subunit	Endocytosis (ko04144)	[U]	Intracellular trafficking, secretion, and vesicular transport	Adaptin N terminal region;; non-SMC mitotic condensation complex subunit 1;; Beta2-adaptin appendage, C-terminal sub-domain;; HEAT repeats;; HEAT repeat;; Adaptin C-terminal domain;; Armadillo/beta-catenin-like repeat;; Nuclear condensing complex subunits, C-term domain	--	U	Intracellular trafficking, secretion, and vesicular transport	AP-1 complex subunit beta-1-like [Oncorhynchus mykiss]
gene10134	--	--	--	K04281|4.03389e-07|mze:101467965|K04281 calpastatin | (RefSeq) cast; calpastatin	--	--	--	Calpain inhibitor	--	O	Posttranslational modification, protein turnover, chaperones	calphotin-like [Oncorhynchus mykiss]
gene37954	--	--	--	--	--	[T]	Signal transduction mechanisms	Armadillo/beta-catenin-like repeat;; HEAT-like repeat	Rap1 GTPase-GDP dissociation stimulator 1-B OS=Xenopus laevis OX=8355 GN=rap1gds1-b PE=2 SV=1	S	Function unknown	rap1 GTPase-GDP dissociation stimulator 1-like [Oncorhynchus mykiss]
Oncorhynchus_mykiss_newGene_65002	--	--	Cellular Component: ruffle (GO:0001726);; Molecular Function: structural constituent of cytoskeleton (GO:0005200);; Molecular Function: inorganic anion exchanger activity (GO:0005452);; Cellular Component: nucleus (GO:0005634);; Cellular Component: focal adhesion (GO:0005925);; Biological Process: mRNA processing (GO:0006397);; Biological Process: cytoskeletal anchoring at plasma membrane (GO:000…	--	--	--	--	--	--	--	--	unnamed protein product [Oncorhynchus mykiss]
gene36471	--	--	--	K14996|0|mze:101487400|K14996 solute carrier family 38 (sodium-coupled neutral amino acid transporter), member 10 | (RefSeq) slc38a10; solute carrier family 38 member 10	--	[E]	Amino acid transport and metabolism	Transmembrane amino acid transporter protein	Putative sodium-coupled neutral amino acid transporter 10 OS=Xenopus laevis OX=8355 GN=slc38a10 PE=2 SV=1	E	Amino acid transport and metabolism	putative sodium-coupled neutral amino acid transporter 10 isoform X2 [Oncorhynchus mykiss]
gene7316	[K]	Transcription	Cellular Component: proteinaceous extracellular matrix (GO:0005578);; Cellular Component: extracellular space (GO:0005615);; Molecular Function: heparin binding (GO:0008201);; Biological Process: Roundabout signaling pathway (GO:0035385);; Molecular Function: Roundabout binding (GO:0048495);; Biological Process: axon extension involved in axon guidance (GO:0048846);; Biological Process: regulatio…	--	--	[R]	General function prediction only	Leucine rich repeat;; Leucine Rich repeats (2 copies);; Leucine rich repeats (6 copies);; Leucine-rich repeat;; Leucine Rich Repeat	Leucine-rich repeat-containing G-protein coupled receptor 4 OS=Danio rerio OX=7955 GN=lgr4 PE=2 SV=1	S	Function unknown	leucine-rich repeat-containing protein 15-like [Oncorhynchus mykiss]
gene15918	--	--	Molecular Function: calcium-dependent cysteine-type endopeptidase activity (GO:0004198);; Molecular Function: calcium ion binding (GO:0005509);; Cellular Component: intracellular (GO:0005622);; Biological Process: proteolysis (GO:0006508);; Cellular Component: integral component of membrane (GO:0016021);;	K01367|0|dre:406768|K01367 calpain-1 [EC:3.4.22.52] | (RefSeq) Capn1, fj67g01, wu:fj67g01; zgc:55262	Protein processing in endoplasmic reticulum (ko04141);; Apoptosis (ko04210)	[OT]	Posttranslational modification, protein turnover, chaperones;; Signal transduction mechanisms	Calpain large subunit, domain III;; Calpain family cysteine protease;; EF-hand domain pair;; EF hand;; EF-hand domain;; EF-hand domain pair;; EF hand	Calpain-1 catalytic subunit OS=Gallus gallus OX=9031 PE=1 SV=2	O	Posttranslational modification, protein turnover, chaperones	calpain-1 catalytic subunit-like [Oncorhynchus mykiss]
gene43299	--	--	--	--	--	--	--	PDZ domain (Also known as DHR or GLGF);; PDZ domain	Disks large homolog 2 OS=Danio rerio OX=7955 GN=dlg2 PE=2 SV=1	O	Posttranslational modification, protein turnover, chaperones	pro-interleukin-16 [Oncorhynchus mykiss]
Oncorhynchus_mykiss_newGene_40450	--	--	--	--	--	--	--	Immunoglobulin V-set domain;; Immunoglobulin domain	--	--	--	uncharacterized protein LOC110534043 [Oncorhynchus mykiss]
gene19352	--	--	--	--	--	--	--	Myeloma-overexpressed-like	COP9 signalosome complex subunit 9 OS=Danio rerio OX=7955 GN=cops9 PE=3 SV=2	S	Function unknown	PREDICTED: myeloma-overexpressed gene 2 protein homolog [Takifugu rubripes]
gene28154	--	--	--	K09409|6.13128e-92|dre:555242|K09409 forkhead box protein P | (RefSeq) foxp2; forkhead box P2	--	[K]	Transcription	Forkhead domain	Forkhead box protein P2 OS=Xenopus laevis OX=8355 GN=foxp2 PE=2 SV=1	K	Transcription	forkhead box protein P2-like [Oncorhynchus mykiss]
gene39883	[Z]	Cytoskeleton	Biological Process: endocardial cushion formation (GO:0003272);; Molecular Function: ATP binding (GO:0005524);; Cellular Component: cytoplasm (GO:0005737);; Cellular Component: cytoskeleton (GO:0005856);; Biological Process: positive regulation of gene expression (GO:0010628);; Cellular Component: lamellipodium (GO:0030027);; Cellular Component: filopodium (GO:0030175);; Biological Process: embry…	K12314|0|ccw:104684380|K12314 actin, alpha cardiac muscle | (RefSeq) ACTC1; actin, alpha, cardiac muscle 1	Cardiac muscle contraction (ko04260);; Adrenergic signaling in cardiomyocytes (ko04261)	[Z]	Cytoskeleton	Actin	Actin, alpha skeletal muscle 2 OS=Xenopus laevis OX=8355 GN=act2 PE=2 SV=1	Z	Cytoskeleton	nuclear pore complex protein Nup133 [Patagioenas fasciata monilis]
Oncorhynchus_mykiss_newGene_11412	--	--	Molecular Function: nucleic acid binding (GO:0003676);; Molecular Function: metal ion binding (GO:0046872);;	--	--	--	--	--	--	--	--	PREDICTED: uncharacterized protein LOC106592258, partial [Salmo salar]
Oncorhynchus_mykiss_newGene_42795	--	--	--	K02202|5.23586e-15|ola:101155202|K02202 cyclin-dependent kinase 7 [EC:2.7.11.22 2.7.11.23] | (RefSeq) cdk7; cyclin dependent kinase 7	Basal transcription factors (ko03022);; Nucleotide excision repair (ko03420);; Cell cycle (ko04110)	[DKL]	Cell cycle control, cell division, chromosome partitioning;; Transcription;; Replication, recombination and repair	--	Cyclin-dependent kinase 7 OS=Carassius auratus OX=7957 GN=cdk7 PE=2 SV=1	T	Signal transduction mechanisms	unnamed protein product [Oncorhynchus mykiss]
Oncorhynchus_mykiss_newGene_51214	--	--	Biological Process: rRNA processing (GO:0006364);; Biological Process: regulation of gene expression (GO:0010468);; Cellular Component: macromolecular complex (GO:0032991);; Cellular Component: intracellular part (GO:0044424);; Biological Process: regulation of cellular process (GO:0050794);;	K14550|2.02939e-22|dre:334446|K14550 U3 small nucleolar RNA-associated protein 10 | (RefSeq) heatr1, BAP28, BAP28-like, fi69e12, flj10359, wu:fi69e12, zC146F4.2, zgc:63510; HEAT repeat containing 1	Ribosome biogenesis in eukaryotes (ko03008)	--	--	--	HEAT repeat-containing protein 1 OS=Danio rerio OX=7955 GN=heatr1 PE=2 SV=1	J	Translation, ribosomal structure and biogenesis	unnamed protein product [Oncorhynchus mykiss]
gene6326	--	--	--	K12605|0|pss:102460265|K12605 CCR4-NOT transcription complex subunit 2 | (RefSeq) CNOT2; CCR4-NOT transcription complex subunit 2	RNA degradation (ko03018)	[KDR]	Transcription;; Cell cycle control, cell division, chromosome partitioning;; General function prediction only	NOT2 / NOT3 / NOT5 family	--	K	Transcription	CCR4-NOT transcription complex subunit 2 isoform X1 [Oncorhynchus mykiss]
gene44761	--	--	Molecular Function: nucleic acid binding (GO:0003676);; Molecular Function: metal ion binding (GO:0046872);;	--	--	[R]	General function prediction only	Zinc finger, C2H2 type	Gastrula zinc finger protein XlCGF48.2 (Fragment) OS=Xenopus laevis OX=8355 PE=2 SV=1	S	Function unknown	zinc finger protein 473 homolog [Oncorhynchus mykiss]
gene22169	--	--	Cellular Component: integral component of membrane (GO:0016021);;	--	--	--	--	Immunoglobulin V-set domain;; Immunoglobulin domain;; Immunoglobulin I-set domain;; Immunoglobulin domain	--	S	Function unknown	Ig-like V-type domain-containing protein FAM187A [Oncorhynchus mykiss]
gene40574	[O]	Posttranslational modification, protein turnover, chaperones	Cellular Component: extracellular space (GO:0005615);;	K09501|0|ola:100529194|K09501 serpin peptidase inhibitor, clade H, member 1 | (RefSeq) serpinh1, hsp47; serpin family H member 1	--	[V]	Defense mechanisms	Serpin (serine protease inhibitor)	Serpin H1 OS=Gallus gallus OX=9031 GN=SERPINH1 PE=1 SV=2	O	Posttranslational modification, protein turnover, chaperones	serpin H1-like [Oncorhynchus mykiss]
gene29336	--	--	Molecular Function: nucleic acid binding (GO:0003676);; Molecular Function: metal ion binding (GO:0046872);;	K09228|1.45552e-87|acs:103281476|K09228 KRAB domain-containing zinc finger protein | (RefSeq) zinc finger protein 658B	--	[R]	General function prediction only	TERF1-interacting nuclear factor 2 N-terminus;; Zinc finger, C2H2 type;; C2H2-type zinc finger;; Zinc-finger double domain;; Zinc-finger double-stranded RNA-binding	Zinc finger protein Xfin OS=Xenopus laevis OX=8355 PE=1 SV=1	S	Function unknown	zinc finger protein 91-like isoform X1 [Oncorhynchus mykiss]
gene8577	--	--	Molecular Function: G-protein coupled receptor activity (GO:0004930);; Biological Process: G-protein coupled receptor signaling pathway (GO:0007186);; Cellular Component: integral component of membrane (GO:0016021);;	--	--	[T]	Signal transduction mechanisms	7 transmembrane receptor (rhodopsin family)	--	S	Function unknown	rhodopsin-like [Oncorhynchus mykiss]
Oncorhynchus_mykiss_newGene_47142	--	--	--	--	--	[R]	General function prediction only	--	--	S	Function unknown	uncharacterized protein LOC111948290 [Oryzias latipes]
gene28729	--	--	Cellular Component: integral component of membrane (GO:0016021);;	--	--	--	--	--	Integral membrane protein GPR137B OS=Xenopus laevis OX=8355 GN=gpr137b PE=2 SV=1	U	Intracellular trafficking, secretion, and vesicular transport	integral membrane protein GPR137B [Oncorhynchus mykiss]
gene9168	--	--	--	K16734|1.76022e-170|mze:101465562|K16734 SAC3 domain-containing protein 1 | (RefSeq) sac3d1; SAC3 domain containing 1	--	[UD]	Intracellular trafficking, secretion, and vesicular transport;; Cell cycle control, cell division, chromosome partitioning	SAC3/GANP family	--	DU	Cell cycle control, cell division, chromosome partitioning;; Intracellular trafficking, secretion, and vesicular transport	SAC3 domain-containing protein 1 isoform X1 [Oncorhynchus mykiss]
gene6737	--	--	Cellular Component: proteasome complex (GO:0000502);; Biological Process: proteasome assembly (GO:0043248);;	K11878|2.40127e-38|mze:101468954|K11878 proteasome assembly chaperone 4 | (RefSeq) psmg4; proteasome assembly chaperone 4	--	--	--	Proteasome assembly chaperone 4	--	O	Posttranslational modification, protein turnover, chaperones	proteasome assembly chaperone 4 isoform X1 [Oncorhynchus mykiss]
gene41789	--	--	Cellular Component: integral component of membrane (GO:0016021);;	--	--	[X]	--	Putative transmembrane family 234	--	S	Function unknown	transmembrane protein 234 [Oncorhynchus mykiss]
Oncorhynchus_mykiss_newGene_47103	--	--	Cellular Component: extracellular region (GO:0005576);; Biological Process: positive regulation of gene expression (GO:0010628);; Biological Process: response to stimulus (GO:0050896);;	K05444|1.02132e-20|tru:105417731|K05444 interleukin 19/20/24 | (RefSeq) interleukin-24-like	--	--	--	--	--	S	Function unknown	interleukin 22 precursor [Oncorhynchus mykiss]
gene41286	--	--	Cellular Component: intracellular (GO:0005622);; Biological Process: intracellular protein transport (GO:0006886);; Biological Process: immune response (GO:0006955);; Biological Process: sensory organ development (GO:0007423);; Cellular Component: integral component of membrane (GO:0016021);; Biological Process: antigen processing and presentation (GO:0019882);; Molecular Function: MHC class II p…	K06505|2.4384e-51|mze:101482220|K06505 CD74 antigen | (RefSeq) cd74; CD74 molecule	Herpes simplex infection (ko05168)	--	--	CLIP, MHC2 interacting;; Class II MHC-associated invariant chain trimerisation domain	--	U	Intracellular trafficking, secretion, and vesicular transport	invariant chain INVX [Oncorhynchus mykiss]
Oncorhynchus_mykiss_newGene_45452	--	--	Molecular Function: nucleotide binding (GO:0000166);; Molecular Function: methyltransferase activity (GO:0008168);; Biological Process: cellular process (GO:0009987);; Molecular Function: oxidoreductase activity, acting on paired donors, with incorporation or reduction of molecular oxygen, 2-oxoglutarate as one donor, and incorporation of one atom each of oxygen into both donors (GO:0016706);; Bi…	--	--	[R]	General function prediction only	Reverse transcriptase (RNA-dependent DNA polymerase);; Immunoglobulin C1-set domain;; Immunoglobulin C1-set domain;; CD80-like C2-set immunoglobulin domain;; Immunoglobulin C1-set domain;; CD80-like C2-set immunoglobulin domain	Ig heavy chain C region, membrane-bound form OS=Heterodontus francisci OX=7792 PE=4 SV=1	S	Function unknown	putative RNA-directed DNA polymerase from transposon X-element [Larimichthys crocea]
gene21553	--	--	--	K21122|0|dre:567050|K21122 ubiquitin carboxyl-terminal hydrolase 28 [EC:3.4.19.12] | (RefSeq) usp28, im:7138195; ubiquitin specific peptidase 28	--	[O]	Posttranslational modification, protein turnover, chaperones	Ubiquitin carboxyl-terminal hydrolase;; Ubiquitin carboxyl-terminal hydrolase	Ubiquitin carboxyl-terminal hydrolase 28 OS=Gallus gallus OX=9031 GN=USP28 PE=2 SV=1	O	Posttranslational modification, protein turnover, chaperones	ubiquitin carboxyl-terminal hydrolase 28-like isoform X1 [Oncorhynchus mykiss]
gene22965	--	--	Molecular Function: aminoacyl-tRNA ligase activity (GO:0004812);;	K15438|6.0015e-72|mze:101481380|K15438 aminoacyl tRNA synthase complex-interacting multifunctional protein 2 | (RefSeq) aimp2; aminoacyl tRNA synthetase complex interacting multifunctional protein 2	--	--	--	AIMP2 lysyl-tRNA synthetase binding domain	--	J	Translation, ribosomal structure and biogenesis	aminoacyl tRNA synthase complex-interacting multifunctional protein 2-like [Oncorhynchus mykiss]
gene4471	--	--	--	--	--	--	--	--	--	--	--	tumor necrosis factor receptor superfamily member 5-like isoform X1 [Oncorhynchus mykiss]
gene35521	[F]	Nucleotide transport and metabolism	Molecular Function: magnesium ion binding (GO:0000287);; Molecular Function: actin binding (GO:0003779);; Molecular Function: adenylosuccinate synthase activity (GO:0004019);; Molecular Function: GTP binding (GO:0005525);; Cellular Component: cytoplasm (GO:0005737);; Biological Process: cellular component organization (GO:0016043);; Biological Process: 'de novo' AMP biosynthetic process (GO:00442…	K01939|0|mze:101469135|K01939 adenylosuccinate synthase [EC:6.3.4.4] | (RefSeq) adssl1; adenylosuccinate synthase like 1	Purine metabolism (ko00230);; Alanine, aspartate and glutamate metabolism (ko00250)	[F]	Nucleotide transport and metabolism	Adenylosuccinate synthetase	Adenylosuccinate synthetase isozyme 1 C OS=Salmo salar OX=8030 GN=adssl1c PE=2 SV=1	F	Nucleotide transport and metabolism	adenylosuccinate synthetase isozyme 1 C [Oncorhynchus mykiss]
Oncorhynchus_mykiss_newGene_54397	--	--	Molecular Function: protein serine/threonine phosphatase activity (GO:0004722);; Biological Process: protein dephosphorylation (GO:0006470);;	K17503|0|mze:101471645|K17503 protein phosphatase 1H [EC:3.1.3.16] | (RefSeq) protein phosphatase 1H-like	--	[T]	Signal transduction mechanisms	Protein phosphatase 2C;; Protein phosphatase 2C	Protein phosphatase 1H OS=Xenopus tropicalis OX=8364 GN=ppm1h PE=2 SV=1	T	Signal transduction mechanisms	protein phosphatase 1H [Salvelinus alpinus]
Oncorhynchus_mykiss_newGene_5685	--	--	--	--	--	--	--	Immunoglobulin V-set domain	Ig heavy chain V region 3 OS=Carassius auratus OX=7957 PE=4 SV=1	S	Function unknown	Ig kappa chain V-I region Walker precursor [Salmo salar]
Oncorhynchus_mykiss_newGene_28663	--	--	--	--	--	--	--	--	--	--	--	PREDICTED: sterile alpha motif domain-containing protein 3 [Salmo salar]
gene14363	[R]	General function prediction only	--	--	--	[R]	General function prediction only	WD domain, G-beta repeat;; Anaphase-promoting complex subunit 4 WD40 domain	WD repeat-containing protein 1 OS=Gallus gallus OX=9031 GN=WDR1 PE=2 SV=1	S	Function unknown	WD repeat-containing protein 20-like [Oncorhynchus mykiss]
gene21486	--	--	Biological Process: protein homooligomerization (GO:0051260);;	--	--	[R]	General function prediction only	BTB/POZ domain	BTB/POZ domain-containing protein KCTD7 OS=Danio rerio OX=7955 GN=kctd7 PE=2 SV=2	S	Function unknown	BTB/POZ domain-containing protein KCTD7-like [Oncorhynchus mykiss]
gene16945	--	--	--	--	--	--	--	DAZ associated protein 2 (DAZAP2)	--	S	Function unknown	DAZ-associated protein 2-like [Oncorhynchus kisutch]
gene33610	--	--	--	--	--	--	--	--	--	S	Function unknown	uncharacterized protein LOC110496065 [Oncorhynchus mykiss]
gene51405	--	--	Cellular Component: integral component of membrane (GO:0016021);;	K06756|1.04192e-42|mze:101476481|K06756 neuronal cell adhesion molecule | (RefSeq) neuronal cell adhesion molecule-like	Cell adhesion molecules (CAMs) (ko04514)	[T]	Signal transduction mechanisms	Fibronectin type III domain	Neuronal cell adhesion molecule OS=Gallus gallus OX=9031 PE=1 SV=1	S	Function unknown	neuronal cell adhesion molecule-like, partial [Oncorhynchus mykiss]
gene51576	--	--	Cellular Component: nucleus (GO:0005634);; Biological Process: regulation of transcription, DNA-templated (GO:0006355);;	--	--	[B]	Chromatin structure and dynamics	--	Transducin-like enhancer protein 3-B OS=Danio rerio OX=7955 GN=tle3b PE=1 SV=2	S	Function unknown	protein groucho-2-like [Oncorhynchus mykiss]
Oncorhynchus_mykiss_newGene_42499	--	--	Molecular Function: voltage-gated calcium channel activity (GO:0005245);; Cellular Component: voltage-gated calcium channel complex (GO:0005891);; Biological Process: regulation of ion transmembrane transport (GO:0034765);; Biological Process: calcium ion transmembrane transport (GO:0070588);;	K04849|0|ola:101157063|K04849 voltage-dependent calcium channel N type alpha-1B | (RefSeq) voltage-dependent N-type calcium channel subunit alpha-1B-like	MAPK signaling pathway (ko04010);; Calcium signaling pathway (ko04020)	[PT]	Inorganic ion transport and metabolism;; Signal transduction mechanisms	Ion transport protein;; Voltage-dependent L-type calcium channel, IQ-associated;; Polycystin cation channel	Probable voltage-dependent N-type calcium channel subunit alpha-1B OS=Diplobatis ommata OX=1870830 PE=2 SV=1	U	Intracellular trafficking, secretion, and vesicular transport	voltage-dependent N-type calcium channel subunit alpha-1B-like [Oncorhynchus kisutch]
gene14317	--	--	Cellular Component: integral component of membrane (GO:0016021);; Molecular Function: peptide-methionine (R)-S-oxide reductase activity (GO:0033743);; Molecular Function: metal ion binding (GO:0046872);; Biological Process: oxidation-reduction process (GO:0055114);;	--	--	[R]	General function prediction only	Yippee zinc-binding/DNA-binding /Mis18, centromere assembly	Protein yippee-like 1 OS=Coturnix japonica OX=93934 GN=YPEL1 PE=3 SV=1	S	Function unknown	unnamed protein product [Oncorhynchus mykiss]
gene12573	[F]	Nucleotide transport and metabolism	Molecular Function: cytidine deaminase activity (GO:0004126);; Molecular Function: zinc ion binding (GO:0008270);; Biological Process: cytidine deamination (GO:0009972);;	K01489|1.64998e-76|mze:101485793|K01489 cytidine deaminase [EC:3.5.4.5] | (RefSeq) cda; cytidine deaminase	Pyrimidine metabolism (ko00240);; Drug metabolism - other enzymes (ko00983)	[F]	Nucleotide transport and metabolism	Cytidine and deoxycytidylate deaminase zinc-binding region;; Cytidine and deoxycytidylate deaminase zinc-binding region	--	F	Nucleotide transport and metabolism	cytidine deaminase-like [Oncorhynchus mykiss]
gene15205	[S]	Function unknown	Molecular Function: ATP binding (GO:0005524);; Cellular Component: nucleus (GO:0005634);; Molecular Function: hydrolase activity, acting on acid anhydrides (GO:0016817);;	K04494|0|mze:101482276|K04494 chromodomain helicase DNA binding protein 8 [EC:3.6.4.12] | (RefSeq) chd8; chromodomain helicase DNA binding protein 8	Wnt signaling pathway (ko04310)	[K]	Transcription	SNF2 family N-terminal domain;; BRK domain;; Chromo (CHRromatin Organisation MOdifier) domain;; Helicase conserved C-terminal domain;; Type III restriction enzyme, res subunit	Chromodomain-helicase-DNA-binding protein 8 OS=Danio rerio OX=7955 GN=chd8 PE=3 SV=2	L	Replication, recombination and repair	chromodomain-helicase-DNA-binding protein 8-like [Oncorhynchus mykiss]
gene22225	--	--	Molecular Function: structural molecule activity (GO:0005198);; Cellular Component: intermediate filament (GO:0005882);;	K07604|1.59828e-165|mze:101469858|K07604 type I keratin, acidic | (RefSeq) keratin, type I cytoskeletal 13	--	--	--	Intermediate filament protein	Keratin, type I cytoskeletal 13 OS=Oncorhynchus mykiss OX=8022 GN=krt13 PE=2 SV=1	Z	Cytoskeleton	keratin, type I cytoskeletal 13-like [Oncorhynchus mykiss]
Oncorhynchus_mykiss_newGene_3856	--	--	Molecular Function: ubiquitin-protein transferase activity (GO:0004842);; Biological Process: protein ubiquitination (GO:0016567);;	K09561|2.26598e-21|xma:102236953|K09561 STIP1 homology and U-box containing protein 1 [EC:2.3.2.27] | (RefSeq) stub1; STIP1 homology and U-box containing protein 1	Ubiquitin mediated proteolysis (ko04120);; Protein processing in endoplasmic reticulum (ko04141)	[O]	Posttranslational modification, protein turnover, chaperones	--	STIP1 homology and U box-containing protein 1 OS=Gallus gallus OX=9031 GN=STUB1 PE=2 SV=1	O	Posttranslational modification, protein turnover, chaperones	E3 ubiquitin-protein ligase CHIP-like [Oncorhynchus mykiss]
gene3964	--	--	Molecular Function: transcription factor activity, sequence-specific DNA binding (GO:0003700);; Biological Process: regulation of transcription, DNA-templated (GO:0006355);; Molecular Function: sequence-specific DNA binding (GO:0043565);; Molecular Function: metal ion binding (GO:0046872);;	K09047|2.50575e-56|mze:101486831|K09047 cyclic AMP-responsive element-binding protein 5 | (RefSeq) creb5; cAMP responsive element binding protein 5	Adrenergic signaling in cardiomyocytes (ko04261)	[K]	Transcription	--	Cyclic AMP-dependent transcription factor ATF-2 OS=Gallus gallus OX=9031 GN=ATF2 PE=2 SV=1	K	Transcription	cyclic AMP-responsive element-binding protein 5-like, partial [Oncorhynchus mykiss]
gene37386	--	--	Molecular Function: sulfotransferase activity (GO:0008146);;	K11823|9.68653e-115|mze:101486484|K11823 sulfotransferase 4A1 [EC:2.8.2.-] | (RefSeq) sult4a1; sulfotransferase family 4A member 1	--	[R]	General function prediction only	Sulfotransferase domain;; Sulfotransferase family	Sulfotransferase family cytosolic 1B member 1 OS=Gallus gallus OX=9031 GN=SULT1B1 PE=2 SV=1	S	Function unknown	sulfotransferase 4A1 [Oncorhynchus mykiss]
gene52861	--	--	--	K12641|1.52525e-91|ola:101160250|K12641 lamin A/C | (RefSeq) lamin-A-like	Apoptosis (ko04210)	[DY]	Cell cycle control, cell division, chromosome partitioning;; Nuclear structure	Lamin Tail Domain	Lamin-A OS=Xenopus laevis OX=8355 GN=lmna PE=2 SV=1	S	Function unknown	lamin-A-like, partial [Oncorhynchus mykiss]
gene779	--	--	Molecular Function: Rho guanyl-nucleotide exchange factor activity (GO:0005089);; Cellular Component: intracellular (GO:0005622);; Biological Process: regulation of Rho protein signal transduction (GO:0035023);; Biological Process: positive regulation of GTPase activity (GO:0043547);;	--	--	[T]	Signal transduction mechanisms	RhoGEF domain;; Domain of unknown function (DUF4675);; Pleckstrin homology domain	--	T	Signal transduction mechanisms	pleckstrin homology domain-containing family G member 7-like [Oncorhynchus mykiss]
Oncorhynchus_mykiss_newGene_18827	--	--	Cellular Component: intracellular (GO:0005622);; Molecular Function: zinc ion binding (GO:0008270);;	--	--	--	--	--	--	S	Function unknown	PREDICTED: tripartite motif-containing protein 16-like [Salmo salar]
gene49928	--	--	Biological Process: somitogenesis (GO:0001756);; Biological Process: heart field specification (GO:0003128);; Biological Process: atrioventricular valve morphogenesis (GO:0003181);; Cellular Component: extracellular region (GO:0005576);;	--	--	--	--	Fibronectin type I domain	Fibronectin (Fragments) OS=Gallus gallus OX=9031 GN=FN1 PE=2 SV=3	O	Posttranslational modification, protein turnover, chaperones	unnamed protein product [Oncorhynchus mykiss]
gene20073	[F]	Nucleotide transport and metabolism	Cellular Component: integral component of membrane (GO:0016021);; Molecular Function: hydrolase activity (GO:0016787);;	K12305|0|mze:101474178|K12305 ectonucleoside triphosphate diphosphohydrolase 4 [EC:3.6.1.6] | (RefSeq) entpd4; ectonucleoside triphosphate diphosphohydrolase 4	Purine metabolism (ko00230);; Pyrimidine metabolism (ko00240);; Lysosome (ko04142)	[F]	Nucleotide transport and metabolism	GDA1/CD39 (nucleoside phosphatase) family	Ectonucleoside triphosphate diphosphohydrolase 7 OS=Xenopus tropicalis OX=8364 GN=entpd7 PE=2 SV=1	GO	Carbohydrate transport and metabolism;; Posttranslational modification, protein turnover, chaperones	ectonucleoside triphosphate diphosphohydrolase 4-like isoform X1 [Oncorhynchus mykiss]
gene10348	[T]	Signal transduction mechanisms	Cellular Component: intracellular (GO:0005622);; Biological Process: protein ubiquitination (GO:0016567);; Biological Process: intracellular signal transduction (GO:0035556);;	K10328|0|mze:101476579|K10328 ankyrin repeat and SOCS box protein 6 | (RefSeq) asb6; ankyrin repeat and SOCS box containing 6	--	[R]	General function prediction only	Ankyrin repeats (many copies);; Ankyrin repeats (3 copies);; Ankyrin repeat;; Ankyrin repeats (many copies);; Ankyrin repeat;; SOCS box	Serine/threonine-protein phosphatase 6 regulatory ankyrin repeat subunit B OS=Gallus gallus OX=9031 GN=ANKRD44 PE=2 SV=1	S	Function unknown	ankyrin repeat and SOCS box protein 6 isoform X1 [Oncorhynchus kisutch]
gene13680	--	--	--	--	--	--	--	Domain of unknown function (DUF4796)	--	S	Function unknown	MKRN2 opposite strand protein-like [Oncorhynchus mykiss]
gene40677	--	--	Molecular Function: G-protein coupled receptor activity (GO:0004930);; Molecular Function: olfactory receptor activity (GO:0004984);; Cellular Component: plasma membrane (GO:0005886);; Biological Process: G-protein coupled receptor signaling pathway (GO:0007186);; Cellular Component: integral component of membrane (GO:0016021);; Biological Process: detection of chemical stimulus involved in senso…	K04257|1.38956e-136|dre:80368|K04257 olfactory receptor | (RefSeq) or107-1, ZF1A, olfr7.1, or7.1, or9, or9a, orzf1a, zor9; odorant receptor, family D, subfamily 107, member 1	--	--	--	Olfactory receptor;; 7 transmembrane receptor (rhodopsin family);; Serpentine type 7TM GPCR chemoreceptor Srsx;; Serpentine type 7TM GPCR chemoreceptor Srx	Olfactory receptor-like protein COR4 OS=Gallus gallus OX=9031 GN=COR4 PE=3 SV=1	S	Function unknown	olfactory receptor 51I1-like [Oncorhynchus mykiss]
gene44107	[O]	Posttranslational modification, protein turnover, chaperones	--	K17592|0|mze:101478555|K17592 sacsin | (RefSeq) sacs; sacsin molecular chaperone	--	--	--	HEPN domain;; Ubiquitin family	--	S	Function unknown	sacsin-like [Oncorhynchus mykiss]
gene37877	--	--	--	K16777|0|xma:102226248|K16777 neuralized-like protein 4 | (RefSeq) neurl4; neuralized E3 ubiquitin protein ligase 4	--	[T]	Signal transduction mechanisms	Neuralized	Neuralized-like protein 4 OS=Xenopus tropicalis OX=8364 GN=neurl4 PE=2 SV=1	S	Function unknown	neuralized-like protein 4 [Oncorhynchus mykiss]
gene45985	--	--	Cellular Component: integral component of membrane (GO:0016021);;	--	--	--	--	MAM domain, meprin/A5/mu;; Low-density lipoprotein receptor domain class A	Thyroid hormone-induced protein B OS=Xenopus laevis OX=8355 PE=2 SV=2	S	Function unknown	apical endosomal glycoprotein isoform X2 [Oncorhynchus mykiss]
gene3916	[R]	General function prediction only	--	K12352|0|tru:101079664|K12352 sphingomyelin phosphodiesterase 3 [EC:3.1.4.12] | (RefSeq) sphingomyelin phosphodiesterase 3-like	Sphingolipid metabolism (ko00600)	--	--	--	Sphingomyelin phosphodiesterase 5 OS=Danio rerio OX=7955 GN=smpd5 PE=1 SV=1	S	Function unknown	sphingomyelin phosphodiesterase 5-like [Oncorhynchus mykiss]
gene16865	--	--	Molecular Function: nucleic acid binding (GO:0003676);; Molecular Function: metal ion binding (GO:0046872);;	--	--	[R]	General function prediction only	Zinc-finger double domain;; Zinc finger, C2H2 type;; C2H2-type zinc finger	Oocyte zinc finger protein XlCOF15 (Fragment) OS=Xenopus laevis OX=8355 PE=3 SV=1	S	Function unknown	myeloid zinc finger 1-like [Oncorhynchus mykiss]
gene2100	--	--	Cellular Component: integral component of membrane (GO:0016021);;	K06170|1.01143e-60|mze:101481793|K06170 presenilin enhancer 2 | (RefSeq) psenen; presenilin enhancer gamma-secretase subunit	Notch signaling pathway (ko04330)	[S]	Function unknown	Presenilin enhancer-2 subunit of gamma secretase	Gamma-secretase subunit PEN-2 OS=Danio rerio OX=7955 GN=psenen PE=3 SV=1	S	Function unknown	gamma-secretase subunit PEN-2-like [Oncorhynchus mykiss]
gene1722	--	--	--	--	--	--	--	XPG domain containing;; XPG N-terminal domain	Protein asteroid homolog 1 OS=Danio rerio OX=7955 GN=aste1 PE=2 SV=1	S	Function unknown	protein asteroid homolog 1-like [Oncorhynchus mykiss]
gene15533	--	--	Molecular Function: mechanically-gated ion channel activity (GO:0008381);; Cellular Component: integral component of membrane (GO:0016021);; Biological Process: ion transmembrane transport (GO:0034220);;	--	--	[S]	Function unknown	Piezo	--	S	Function unknown	piezo-type mechanosensitive ion channel component 2-like [Oncorhynchus mykiss]
gene9791	--	--	--	K09228|9.93151e-23|mze:101476218|K09228 KRAB domain-containing zinc finger protein | (RefSeq) zinc finger protein 14-like	--	[R]	General function prediction only	TERF1-interacting nuclear factor 2 N-terminus;; Zinc finger, C2H2 type	Zinc finger protein Xfin OS=Xenopus laevis OX=8355 PE=1 SV=1	K	Transcription	zinc finger protein 420-like [Oncorhynchus mykiss]
gene12552	--	--	Molecular Function: receptor binding (GO:0005102);;	--	--	--	--	Ki-ras-induced actin-interacting protein-IP3R-interacting domain	--	O	Posttranslational modification, protein turnover, chaperones	uncharacterized protein LOC110527686 [Oncorhynchus mykiss]
gene24808	--	--	Molecular Function: calcium ion binding (GO:0005509);; Biological Process: response to lipopolysaccharide (GO:0032496);;	K12758|1.66509e-83|dre:447930|K12758 fast skeletal myosin light chain 2 | (RefSeq) mylpfb, zgc:103639; myosin light chain, phosphorylatable, fast skeletal muscle b	Focal adhesion (ko04510);; Tight junction (ko04530);; Regulation of actin cytoskeleton (ko04810)	[Z]	Cytoskeleton	EF-hand domain;; EF hand;; EF-hand domain pair	Myosin regulatory light chain 2, skeletal muscle isoform OS=Gallus gallus OX=9031 GN=MYLPF PE=1 SV=2	DTZ	Cell cycle control, cell division, chromosome partitioning;; Signal transduction mechanisms;; Cytoskeleton	myosin regulatory light chain 2, skeletal muscle isoform type 2-like [Oncorhynchus kisutch]
gene4474	--	--	Molecular Function: Rho guanyl-nucleotide exchange factor activity (GO:0005089);; Biological Process: regulation of Rho protein signal transduction (GO:0035023);; Biological Process: positive regulation of GTPase activity (GO:0043547);;	--	--	[T]	Signal transduction mechanisms	RhoGEF domain	Triple functional domain protein OS=Danio rerio OX=7955 GN=trio PE=3 SV=1	T	Signal transduction mechanisms	pleckstrin homology domain-containing family G member 5-like isoform X2 [Oncorhynchus mykiss]
gene11764	--	--	Cellular Component: nuclear telomere cap complex (GO:0000783);; Molecular Function: double-stranded telomeric DNA binding (GO:0003691);; Biological Process: telomeric loop formation (GO:0031627);; Biological Process: protection from non-homologous end joining at telomere (GO:0031848);; Molecular Function: protein homodimerization activity (GO:0042803);;	K11111|2.67297e-17|dre:192316|K11111 telomeric repeat-binding factor 2 | (RefSeq) terfa, CHUNP6903, wu:fi15d05, wu:fi22b03, zgc:111909, zgc:114011; telomeric repeat binding factor a	--	--	--	Myb-like DNA-binding domain;; Myb-like DNA-binding domain	Telomeric repeat-binding factor 2 OS=Gallus gallus OX=9031 GN=TERF2 PE=1 SV=2	K	Transcription	telomeric repeat-binding factor 2-like, partial [Oncorhynchus mykiss]
gene43701	--	--	Molecular Function: cytokine activity (GO:0005125);; Molecular Function: cytokine receptor binding (GO:0005126);; Cellular Component: extracellular space (GO:0005615);; Biological Process: immune response (GO:0006955);;	--	--	--	--	Interleukin 15	--	S	Function unknown	uncharacterized protein LOC110507504 [Oncorhynchus mykiss]
gene49470	--	--	Molecular Function: nucleic acid binding (GO:0003676);; Molecular Function: metal ion binding (GO:0046872);;	--	--	[R]	General function prediction only	Zinc-finger double domain;; Zinc finger, C2H2 type	Gastrula zinc finger protein XlCGF52.1 (Fragment) OS=Xenopus laevis OX=8355 PE=3 SV=1	S	Function unknown	zinc finger protein 2 homolog [Oncorhynchus mykiss]
gene46630	--	--	Molecular Function: ubiquitin-protein transferase activity (GO:0004842);; Biological Process: protein ubiquitination (GO:0016567);; Molecular Function: ligase activity (GO:0016874);;	K10594|9.4538e-85|xma:102223057|K10594 E3 ubiquitin-protein ligase HERC1 [EC:2.3.2.26] | (RefSeq) probable E3 ubiquitin-protein ligase HERC1	Ubiquitin mediated proteolysis (ko04120)	[S]	Function unknown	WD domain, G-beta repeat;; Anaphase-promoting complex subunit 4 WD40 domain	Probable cytosolic iron-sulfur protein assembly protein ciao1-A OS=Salmo salar OX=8030 GN=ciao1a PE=2 SV=1	DZ	Cell cycle control, cell division, chromosome partitioning;; Cytoskeleton	probable E3 ubiquitin-protein ligase HERC1, partial [Oncorhynchus kisutch]
Oncorhynchus_mykiss_newGene_37721	--	--	Molecular Function: scavenger receptor activity (GO:0005044);; Biological Process: receptor-mediated endocytosis (GO:0006898);; Cellular Component: membrane (GO:0016020);;	K06456|1.87964e-18|mze:101470484|K06456 T-cell surface glycoprotein CD6 | (RefSeq) T-cell differentiation antigen CD6-like	Cell adhesion molecules (CAMs) (ko04514)	--	--	--	--	U	Intracellular trafficking, secretion, and vesicular transport	unnamed protein product [Oncorhynchus mykiss]
gene7709	[I]	Lipid transport and metabolism	Molecular Function: acetate-CoA ligase activity (GO:0003987);; Molecular Function: ATP binding (GO:0005524);; Molecular Function: AMP binding (GO:0016208);; Biological Process: acetyl-CoA biosynthetic process from acetate (GO:0019427);;	K01895|0|xma:102218182|K01895 acetyl-CoA synthetase [EC:6.2.1.1] | (RefSeq) acetyl-coenzyme A synthetase 2-like, mitochondrial	Glycolysis / Gluconeogenesis (ko00010);; Pyruvate metabolism (ko00620);; Propanoate metabolism (ko00640);; Carbon metabolism (ko01200)	[I]	Lipid transport and metabolism	AMP-binding enzyme;; Acetyl-coenzyme A synthetase N-terminus;; AMP-binding enzyme C-terminal domain	Acetoacetyl-CoA synthetase OS=Danio rerio OX=7955 GN=aacs PE=2 SV=1	I	Lipid transport and metabolism	acetyl-coenzyme A synthetase 2-like, mitochondrial [Oncorhynchus mykiss]
gene21347	--	--	Cellular Component: nucleus (GO:0005634);; Cellular Component: cytoplasm (GO:0005737);; Biological Process: apoptotic process (GO:0006915);; Biological Process: mitotic cell cycle checkpoint (GO:0007093);; Biological Process: multicellular organism development (GO:0007275);; Molecular Function: zinc ion binding (GO:0008270);; Molecular Function: UDP-N-acetylmuramoylalanyl-D-glutamyl-2,6-diaminopi…	K08742|2.48559e-139|ola:101157637|K08742 E3 ubiquitin-protein ligase SIAH2 [EC:2.3.2.27] | (RefSeq) E3 ubiquitin-protein ligase Siah2-like	--	[R]	General function prediction only	Seven in absentia protein family	E3 ubiquitin-protein ligase Siah2 OS=Danio rerio OX=7955 GN=siah2l PE=2 SV=2	O	Posttranslational modification, protein turnover, chaperones	E3 ubiquitin-protein ligase Siah2 isoform X2 [Oncorhynchus mykiss]
gene47981	--	--	--	--	--	[R]	General function prediction only	--	--	S	Function unknown	unnamed protein product [Oncorhynchus mykiss]
gene38729	[R]	General function prediction only	--	K14556|0|mze:101481037|K14556 U3 small nucleolar RNA-associated protein 12 | (RefSeq) wdr3; WD repeat domain 3	Ribosome biogenesis in eukaryotes (ko03008)	[A]	RNA processing and modification	WD domain, G-beta repeat;; Dip2/Utp12 Family;; Anaphase-promoting complex subunit 4 WD40 domain	WD repeat-containing protein 61 OS=Danio rerio OX=7955 GN=wdr61 PE=2 SV=1	S	Function unknown	WD repeat-containing protein 3-like [Oncorhynchus mykiss]
gene1043	--	--	--	--	--	--	--	--	--	S	Function unknown	V-type immunoglobulin domain-containing suppressor of T-cell activation [Oncorhynchus mykiss]
gene17790	[T]	Signal transduction mechanisms	Molecular Function: fibroblast growth factor-activated receptor activity (GO:0005007);; Molecular Function: ATP binding (GO:0005524);; Biological Process: positive regulation of cell proliferation (GO:0008284);; Biological Process: fibroblast growth factor receptor signaling pathway (GO:0008543);; Cellular Component: integral component of membrane (GO:0016021);; Biological Process: peptidyl-tyros…	K05095|0|mze:101477307|K05095 fibroblast growth factor receptor 4 [EC:2.7.10.1] | (RefSeq) fgfr4; fibroblast growth factor receptor 4	MAPK signaling pathway (ko04010);; Endocytosis (ko04144);; Regulation of actin cytoskeleton (ko04810)	[T]	Signal transduction mechanisms	Protein tyrosine kinase;; Immunoglobulin domain;; Protein kinase domain;; Immunoglobulin I-set domain;; Immunoglobulin domain;; Immunoglobulin domain;; Immunoglobulin V-set domain;; Ig-like domain on T-cell surface glycoprotein CD3 epsilon chain	Fibroblast growth factor receptor 4 OS=Danio rerio OX=7955 GN=fgfr4 PE=1 SV=1	T	Signal transduction mechanisms	fibroblast growth factor receptor 4-like [Oncorhynchus mykiss]
gene3049	[IQR]	Lipid transport and metabolism;; Secondary metabolites biosynthesis, transport and catabolism;; General function prediction only	--	--	--	--	--	short chain dehydrogenase	--	S	Function unknown	uncharacterized protein LOC110494333 [Oncorhynchus mykiss]
gene6166	--	--	--	--	--	--	--	--	--	S	Function unknown	uncharacterized protein LOC110522718 [Oncorhynchus mykiss]
Oncorhynchus_mykiss_newGene_43754	--	--	Molecular Function: DNA binding (GO:0003677);; Biological Process: transposition, DNA-mediated (GO:0006313);; Biological Process: DNA integration (GO:0015074);;	--	--	--	--	Helix-turn-helix domain;; Transposase	--	S	Function unknown	unnamed protein product [Oncorhynchus mykiss]
gene15916	[G]	Carbohydrate transport and metabolism	Biological Process: kidney development (GO:0001822);; Cellular Component: integral component of plasma membrane (GO:0005887);; Biological Process: larval locomotory behavior (GO:0008345);; Biological Process: potassium ion import (GO:0010107);; Molecular Function: ATP-activated inward rectifier potassium channel activity (GO:0015272);; Biological Process: regulation of ion transmembrane transport…	K05003|0|mze:101477345|K05003 potassium inwardly-rectifying channel subfamily J member 10 | (RefSeq) ATP-sensitive inward rectifier potassium channel 10-like	--	[P]	Inorganic ion transport and metabolism	Inward rectifier potassium channel	Inward rectifier potassium channel 2 OS=Gallus gallus OX=9031 GN=KCNJ2 PE=2 SV=1	U	Intracellular trafficking, secretion, and vesicular transport	ATP-sensitive inward rectifier potassium channel 10-like [Oncorhynchus mykiss]
gene16197	--	--	--	K10510|0|mze:101464922|K10510 zinc finger and BTB domain-containing protein 38 | (RefSeq) zbtb4; uncharacterized LOC101464922	--	[R]	General function prediction only	Zinc finger, C2H2 type;; Zinc-finger double-stranded RNA-binding	Transcriptional regulator Kaiso OS=Xenopus laevis OX=8355 GN=zbtb33 PE=1 SV=2	S	Function unknown	zinc finger and BTB domain-containing protein 38-like, partial [Oncorhynchus mykiss]
gene9753	--	--	Molecular Function: hydrolase activity (GO:0016787);; Biological Process: phosphatidylinositol dephosphorylation (GO:0046856);;	K03084|0|mze:101476435|K03084 phosphatidylinositol-3,4,5-trisphosphate 5-phosphatase 1 [EC:3.1.3.86] | (RefSeq) inpp5d; inositol polyphosphate-5-phosphatase D	Inositol phosphate metabolism (ko00562);; Phosphatidylinositol signaling system (ko04070)	[U]	Intracellular trafficking, secretion, and vesicular transport	SH2 domain	Phosphatidylinositol 3,4,5-trisphosphate 5-phosphatase 1 OS=Xenopus laevis OX=8355 GN=inpp5d PE=2 SV=1	T	Signal transduction mechanisms	phosphatidylinositol 3,4,5-trisphosphate 5-phosphatase 1-like [Oncorhynchus mykiss]
Oncorhynchus_mykiss_newGene_13212	--	--	--	--	--	--	--	Two component regulator propeller;; 23S rRNA methylase leader peptide (ErmC);; Domain of unknown function (DUF4253);; Regulatory subunit of type II PKA R-subunit	--	S	Function unknown	hypothetical protein XENTR_v90030140mg [Xenopus tropicalis]
gene49980	--	--	Cellular Component: condensed chromosome outer kinetochore (GO:0000940);; Biological Process: mitotic cell cycle (GO:0007067);; Biological Process: spindle checkpoint (GO:0031577);; Biological Process: protein localization to kinetochore (GO:0034501);; Molecular Function: kinetochore binding (GO:0043515);; Biological Process: cell division (GO:0051301);;	--	--	--	--	--	Protein Spindly OS=Danio rerio OX=7955 GN=spdl1 PE=2 SV=1	Z	Cytoskeleton	unnamed protein product [Oncorhynchus mykiss]
Oncorhynchus_mykiss_newGene_53372	--	--	Biological Process: autophagosome assembly (GO:0000045);; Cellular Component: autophagosome membrane (GO:0000421);; Biological Process: autophagy of mitochondrion (GO:0000422);; Cellular Component: cytosol (GO:0005829);; Biological Process: cellular response to nitrogen starvation (GO:0006995);; Molecular Function: microtubule binding (GO:0008017);;	K10435|4.10484e-13|ola:105354249|K10435 microtubule-associated protein 1 light chain | (RefSeq) map1lc3b; microtubule associated protein 1 light chain 3 beta	--	[Z]	Cytoskeleton	--	--	U	Intracellular trafficking, secretion, and vesicular transport	microtubule-associated proteins 1A/1B light chain 3B [Astyanax mexicanus]
Oncorhynchus_mykiss_newGene_40012	--	--	Molecular Function: magnesium ion binding (GO:0000287);; Molecular Function: RNA binding (GO:0003723);; Molecular Function: phenylalanine-tRNA ligase activity (GO:0004826);; Molecular Function: ATP binding (GO:0005524);; Biological Process: phenylalanyl-tRNA aminoacylation (GO:0006432);;	--	--	--	--	IQ calmodulin-binding motif;; MYM-type Zinc finger with FCS sequence motif;; Lactocin 705 family	--	S	Function unknown	unnamed protein product [Oncorhynchus mykiss]
Oncorhynchus_mykiss_newGene_2129	--	--	--	--	--	--	--	--	--	--	--	OX-2 membrane glycoprotein-like [Oncorhynchus mykiss]
gene40362	[T]	Signal transduction mechanisms	--	K05743|0|mze:101472506|K05743 LIM domain kinase 1 [EC:2.7.11.1] | (RefSeq) LIM domain kinase 1-like	Regulation of actin cytoskeleton (ko04810)	--	--	Protein tyrosine kinase;; Protein kinase domain;; LIM domain;; PDZ domain (Also known as DHR or GLGF);; Lipopolysaccharide kinase (Kdo/WaaP) family	LIM domain kinase 1 OS=Gallus gallus OX=9031 GN=LIMK1 PE=1 SV=1	T	Signal transduction mechanisms	LIM domain kinase 1-like isoform X1 [Oncorhynchus mykiss]
gene43475	[O]	Posttranslational modification, protein turnover, chaperones	--	K01415|0|dre:793465|K01415 endothelin-converting enzyme [EC:3.4.24.71] | (RefSeq) ece2b, ECE2, si:dkey-83h2.6; endothelin converting enzyme 2b	--	[E]	Amino acid transport and metabolism	Peptidase family M13;; Peptidase family M13	--	O	Posttranslational modification, protein turnover, chaperones	endothelin-converting enzyme 2-like isoform X1 [Oncorhynchus mykiss]
gene43202	--	--	Molecular Function: cation:chloride symporter activity (GO:0015377);; Cellular Component: integral component of membrane (GO:0016021);; Biological Process: chloride transmembrane transport (GO:1902476);;	K14425|2.20742e-61|ola:101173045|K14425 solute carrier family 12 (sodium/potassium/chloride transporter), member 1 | (RefSeq) slc12a1; solute carrier family 12 member 1	--	[P]	Inorganic ion transport and metabolism	Amino acid permease N-terminal	Solute carrier family 12 member 2 OS=Squalus acanthias OX=7797 GN=SLC12A2 PE=1 SV=1	E	Amino acid transport and metabolism	solute carrier family 12 member 1-like [Oncorhynchus mykiss]
gene33004	[P]	Inorganic ion transport and metabolism	Molecular Function: copper ion binding (GO:0005507);; Biological Process: metal ion transport (GO:0030001);;	K17686|0|mze:101464702|K17686 Cu+-exporting ATPase [EC:3.6.3.54] | (RefSeq) atp7b; ATPase copper transporting beta	--	[P]	Inorganic ion transport and metabolism	Heavy-metal-associated domain;; haloacid dehalogenase-like hydrolase;; E1-E2 ATPase;; haloacid dehalogenase-like hydrolase	Sarcoplasmic/endoplasmic reticulum calcium ATPase 1 OS=Makaira nigricans OX=13604 GN=atp2a1 PE=2 SV=2	P	Inorganic ion transport and metabolism	copper-transporting ATPase 2-like [Oncorhynchus mykiss]
gene29719	--	--	Molecular Function: G-protein coupled receptor activity (GO:0004930);; Biological Process: G-protein coupled receptor signaling pathway (GO:0007186);; Cellular Component: integral component of membrane (GO:0016021);;	K04270|2.1313e-125|mze:101472069|K04270 purinergic receptor P2Y, G protein-coupled, 1 | (RefSeq) P2Y purinoceptor 1-like	Neuroactive ligand-receptor interaction (ko04080)	--	--	7 transmembrane receptor (rhodopsin family)	P2Y purinoceptor 1 OS=Meleagris gallopavo OX=9103 GN=P2RY1 PE=2 SV=1	S	Function unknown	P2Y purinoceptor 1-like [Oncorhynchus mykiss]
gene23116	[R]	General function prediction only	--	--	--	[R]	General function prediction only	Zinc-finger double domain;; Zinc finger, C2H2 type;; C2H2-type zinc finger;; C2H2-type zinc finger;; C2HE / C2H2 / C2HC zinc-binding finger;; Zinc ribbon domain;; zinc-finger C2H2-type;; Phorbol esters/diacylglycerol binding domain (C1 domain);; LYAR-type C2HC zinc finger;; Zinc-finger double-stranded RNA-binding	Oocyte zinc finger protein XlCOF6 (Fragment) OS=Xenopus laevis OX=8355 PE=3 SV=1	S	Function unknown	zinc finger protein 239-like [Oncorhynchus kisutch]
gene31933	--	--	Cellular Component: nucleus (GO:0005634);; Biological Process: regulation of transcription, DNA-templated (GO:0006355);; Molecular Function: sequence-specific DNA binding (GO:0043565);;	K09294|1.20185e-128|dre:58043|K09294 homeobox protein HoxA/B/C/D9 | (RefSeq) hoxc9a, BZ-39, bz39, hoxc9, zgc:109844; homeobox C9a	--	[K]	Transcription	Hox9 activation region;; Homeobox domain	Homeobox protein Hox-C9 OS=Oryzias latipes OX=8090 GN=hoxc9 PE=2 SV=1	K	Transcription	homeobox protein Hox-C9a-like [Oncorhynchus mykiss]
gene10205	--	--	Molecular Function: nucleic acid binding (GO:0003676);; Molecular Function: metal ion binding (GO:0046872);;	K10505|6.95132e-179|mze:101473380|K10505 zinc finger and BTB domain-containing protein 26 | (RefSeq) zinc finger and BTB domain-containing protein 26-like	--	[R]	General function prediction only	BTB/POZ domain;; Zinc finger, C2H2 type;; Zinc-finger double domain;; C2H2-type zinc finger	Zinc finger and BTB domain-containing protein 14 OS=Gallus gallus OX=9031 GN=ZBTB14 PE=2 SV=1	S	Function unknown	zinc finger and BTB domain-containing protein 26-like isoform X1 [Oncorhynchus mykiss]
gene41805	[O]	Posttranslational modification, protein turnover, chaperones	Biological Process: response to oxidative stress (GO:0006979);; Molecular Function: peptide-methionine (S)-S-oxide reductase activity (GO:0008113);; Cellular Component: integral component of membrane (GO:0016021);; Biological Process: protein repair (GO:0030091);; Biological Process: oxidation-reduction process (GO:0055114);;	K07304|1.62817e-111|ola:101163534|K07304 peptide-methionine (S)-S-oxide reductase [EC:1.8.4.11] | (RefSeq) mitochondrial peptide methionine sulfoxide reductase-like	--	[O]	Posttranslational modification, protein turnover, chaperones	Peptide methionine sulfoxide reductase	--	O	Posttranslational modification, protein turnover, chaperones	uncharacterized protein LOC110505275 isoform X1 [Oncorhynchus mykiss]
Oncorhynchus_mykiss_newGene_1489	--	--	--	--	--	--	--	--	--	--	--	PREDICTED: uncharacterized protein LOC106566474 [Salmo salar]
gene42508	[O]	Posttranslational modification, protein turnover, chaperones	Molecular Function: metallocarboxypeptidase activity (GO:0004181);; Biological Process: proteolysis (GO:0006508);; Molecular Function: zinc ion binding (GO:0008270);;	K08638|0|xma:102231008|K08638 carboxypeptidase X1 [EC:3.4.17.-] | (RefSeq) probable carboxypeptidase X1	--	[R]	General function prediction only	Zinc carboxypeptidase;; Carboxypeptidase regulatory-like domain	Carboxypeptidase E OS=Lophius americanus OX=8073 GN=cpe PE=2 SV=1	E	Amino acid transport and metabolism	probable carboxypeptidase X1 [Oncorhynchus mykiss]
gene40827	--	--	--	K14861|6.40207e-76|mze:101477769|K14861 nucleolar pre-ribosomal-associated protein 1 | (RefSeq) urb1; URB1 ribosome biogenesis 1 homolog (S. cerevisiae)	--	[S]	Function unknown	Nucleolar pre-ribosomal-associated protein 1	--	S	Function unknown	nucleolar pre-ribosomal-associated protein 1-like [Oncorhynchus mykiss]
Oncorhynchus_mykiss_newGene_5998	--	--	--	K08824|3.1603e-11|xma:102220412|K08824 cyclin-dependent kinase-like [EC:2.7.11.22] | (RefSeq) cdkl1; cyclin dependent kinase like 1	--	[R]	General function prediction only	--	Cyclin-dependent kinase-like 1 OS=Danio rerio OX=7955 GN=cdkl1 PE=2 SV=1	T	Signal transduction mechanisms	PREDICTED: cyclin-dependent kinase-like 1 [Poecilia mexicana]
Oncorhynchus_mykiss_newGene_24250	--	--	Molecular Function: DNA binding (GO:0003677);; Molecular Function: cytokine activity (GO:0005125);; Cellular Component: nucleus (GO:0005634);; Cellular Component: chromosome (GO:0005694);; Biological Process: transposition, DNA-mediated (GO:0006313);; Biological Process: inflammatory response (GO:0006954);; Biological Process: DNA integration (GO:0015074);;	K10802|2.55543e-17|xma:102231753|K10802 high mobility group protein B1 | (RefSeq) high mobility group protein B1-like	Base excision repair (ko03410)	[R]	General function prediction only	HMG (high mobility group) box;; HMG-box domain	High mobility group-T protein OS=Oncorhynchus mykiss OX=8022 PE=2 SV=2	B	Chromatin structure and dynamics	high-mobility group box 1, partial [Oncorhynchus mykiss]
gene41738	--	--	Molecular Function: protein kinase activity (GO:0004672);; Molecular Function: ATP binding (GO:0005524);; Biological Process: protein phosphorylation (GO:0006468);; Cellular Component: integral component of membrane (GO:0016021);;	K17548|0|mze:101478809|K17548 protein kinase domain-containing protein, cytoplasmic | (RefSeq) extracellular tyrosine-protein kinase PKDCC-like	--	[T]	Signal transduction mechanisms	Protein-kinase domain of FAM69	--	T	Signal transduction mechanisms	unnamed protein product [Oncorhynchus mykiss]
gene10145	--	--	Cellular Component: integral component of membrane (GO:0016021);;	--	--	--	--	TMC domain	Transmembrane channel-like protein 2-B OS=Danio rerio OX=7955 GN=tmc2b PE=2 SV=2	U	Intracellular trafficking, secretion, and vesicular transport	transmembrane channel-like protein 2 [Oncorhynchus mykiss]
gene24452	--	--	Molecular Function: oxygen transporter activity (GO:0005344);; Molecular Function: iron ion binding (GO:0005506);; Cellular Component: hemoglobin complex (GO:0005833);; Biological Process: oxygen transport (GO:0015671);; Molecular Function: oxygen binding (GO:0019825);; Molecular Function: heme binding (GO:0020037);;	K13826|2.37934e-77|dre:30597|K13826 hemoglobin subunit zeta | (RefSeq) hbae1, HBA2r, HBAA1, SI:dZ118J2.10, SI:dZ118J2.8, dZ118J2.6, hba2, si:by119c3.1, si:by119c3.3, si:xx-119c3.3, wu:fa12a11, wu:fb74f06, zgc:86936; hemoglobin, alpha embryonic 1	--	[C]	Energy production and conversion	Globin	Hemoglobin subunit alpha-2 OS=Gobionotothen gibberifrons OX=36202 GN=hba2 PE=1 SV=1	C	Energy production and conversion	hemoglobin embryonic subunit alpha-like [Oncorhynchus mykiss]
Oncorhynchus_mykiss_newGene_49376	--	--	Cellular Component: integral component of membrane (GO:0016021);;	K10082|9.78357e-33|lcm:102354406|K10082 lectin, mannose-binding 2 | (RefSeq) LMAN2; lectin, mannose binding 2	Protein processing in endoplasmic reticulum (ko04141)	[U]	Intracellular trafficking, secretion, and vesicular transport	--	--	U	Intracellular trafficking, secretion, and vesicular transport	vesicular integral-membrane protein VIP36-like isoform X2 [Oncorhynchus kisutch]
Oncorhynchus_mykiss_newGene_65190	[R]	General function prediction only	--	K09230|2.75303e-56|cmy:102939544|K09230 SCAN domain-containing zinc finger protein | (RefSeq) zinc finger protein 572-like	--	[R]	General function prediction only	Zinc-finger double domain;; Zinc finger, C2H2 type;; C2H2-type zinc finger;; Phorbol esters/diacylglycerol binding domain (C1 domain)	Oocyte zinc finger protein XlCOF22 OS=Xenopus laevis OX=8355 PE=3 SV=1	S	Function unknown	PREDICTED: gastrula zinc finger protein XlCGF42.1-like isoform X1 [Salmo salar]
Oncorhynchus_mykiss_newGene_21586	--	--	--	--	--	--	--	--	--	--	--	unnamed protein product [Oncorhynchus mykiss]
gene20059	--	--	Molecular Function: guanyl-nucleotide exchange factor activity (GO:0005085);; Cellular Component: intracellular (GO:0005622);; Biological Process: small GTPase mediated signal transduction (GO:0007264);; Biological Process: positive regulation of GTPase activity (GO:0043547);;	K17707|0|mze:101465048|K17707 dedicator of cytokinesis protein 5 | (RefSeq) dock5; dedicator of cytokinesis 5	--	[T]	Signal transduction mechanisms	DOCK N-terminus;; Dock homology region 2;; C2 domain in Dock180 and Zizimin proteins;; Variant SH3 domain;; SH3 domain;; Variant SH3 domain	--	S	Function unknown	dedicator of cytokinesis protein 5-like isoform X1 [Oncorhynchus mykiss]
gene12651	--	--	Molecular Function: G-protein coupled receptor binding (GO:0001664);; Molecular Function: GTPase activity (GO:0003924);; Molecular Function: signal transducer activity (GO:0004871);; Molecular Function: GTP binding (GO:0005525);; Cellular Component: heterotrimeric G-protein complex (GO:0005834);; Biological Process: adenylate cyclase-modulating G-protein coupled receptor signaling pathway (GO:000…	K04631|0|lcm:102361168|K04631 guanine nucleotide-binding protein G(t) subunit alpha 1/2 | (RefSeq) GNAT1; G protein subunit alpha transducin 1	Phototransduction (ko04744)	[DT]	Cell cycle control, cell division, chromosome partitioning;; Signal transduction mechanisms	G-protein alpha subunit;; ADP-ribosylation factor family	Guanine nucleotide-binding protein G(t) subunit alpha OS=Xenopus laevis OX=8355 GN=gnat PE=2 SV=2	S	Function unknown	PREDICTED: guanine nucleotide-binding protein G(t) subunit alpha-like [Salmo salar]
gene40358	[R]	General function prediction only	Biological Process: establishment of mitotic spindle orientation (GO:0000132);; Cellular Component: cytoplasm (GO:0005737);; Cellular Component: microtubule organizing center (GO:0005815);; Cellular Component: microtubule (GO:0005874);; Cellular Component: microtubule associated complex (GO:0005875);; Biological Process: transport (GO:0006810);; Biological Process: mitotic cell cycle (GO:0007067)…	K16794|0|xma:102225619|K16794 platelet-activating factor acetylhydrolase IB subunit alpha | (RefSeq) lissencephaly-1 homolog	Ether lipid metabolism (ko00565)	[S]	Function unknown	WD domain, G-beta repeat;; Anaphase-promoting complex subunit 4 WD40 domain;; Nucleoporin Nup120/160;; LisH;; Eukaryotic translation initiation factor eIF2A	Lissencephaly-1 homolog A OS=Salmo salar OX=8030 GN=pafah1b1-1 PE=2 SV=1	S	Function unknown	lissencephaly-1 homolog A [Oncorhynchus kisutch]
gene26813	[F]	Nucleotide transport and metabolism	Molecular Function: nucleic acid binding (GO:0003676);; Molecular Function: hydrolase activity (GO:0016787);; Molecular Function: metal ion binding (GO:0046872);;	--	--	--	--	DNA/RNA non-specific endonuclease	--	F	Nucleotide transport and metabolism	endonuclease domain-containing 1 protein-like, partial [Oncorhynchus mykiss]
gene40258	--	--	--	K19678|7.11798e-57|pss:102456384|K19678 intraflagellar transport protein 80 | (RefSeq) IFT80; intraflagellar transport 80	--	[R]	General function prediction only	--	--	S	Function unknown	PREDICTED: intraflagellar transport protein 80 homolog isoform X1 [Salmo salar]
gene23461	--	--	Molecular Function: GTP binding (GO:0005525);;	--	--	--	--	AIG1 family	--	S	Function unknown	GTPase IMAP family member 4-like [Oncorhynchus mykiss]
gene23326	--	--	--	--	--	--	--	--	--	S	Function unknown	PREDICTED: MYCBP-associated protein [Salmo salar]
gene14684	--	--	Cellular Component: extracellular region (GO:0005576);; Molecular Function: growth factor activity (GO:0008083);;	--	--	--	--	Transforming growth factor beta like domain	Glial cell line-derived neurotrophic factor OS=Danio rerio OX=7955 GN=gdnf PE=2 SV=1	O	Posttranslational modification, protein turnover, chaperones	artemin-like [Oncorhynchus mykiss]
gene7906	[R]	General function prediction only	--	K12494|0|dre:559329|K12494 PH and SEC7 domain-containing protein | (RefSeq) psd3l, fj59e03, wu:fj59e03; pleckstrin and Sec7 domain containing 3, like	Endocytosis (ko04144)	[U]	Intracellular trafficking, secretion, and vesicular transport	Sec7 domain;; Pleckstrin homology domain;; PH domain	Rho GTPase-activating protein 21 OS=Xenopus tropicalis OX=8364 GN=arhgap21 PE=2 SV=1	S	Function unknown	PH and SEC7 domain-containing protein 3-like isoform X1 [Oncorhynchus mykiss]
gene52481	--	--	--	K19915|4.93039e-63|dre:100000374|K19915 synaptotagmin-17 | (RefSeq) syt17; synaptotagmin XVII	--	[TU]	Signal transduction mechanisms;; Intracellular trafficking, secretion, and vesicular transport	C2 domain	Synaptotagmin-17 OS=Xenopus tropicalis OX=8364 GN=syt17 PE=2 SV=1	S	Function unknown	synaptotagmin-17, partial [Oncorhynchus mykiss]
gene11208	[CI]	Energy production and conversion;; Lipid transport and metabolism	Cellular Component: integral component of membrane (GO:0016021);; Molecular Function: heme binding (GO:0020037);; Molecular Function: metal ion binding (GO:0046872);;	--	--	[C]	Energy production and conversion	Cytochrome b5-like Heme/Steroid binding domain	Cytochrome b5 OS=Gallus gallus OX=9031 GN=CYB5A PE=1 SV=4	CI	Energy production and conversion;; Lipid transport and metabolism	cytochrome b5-like [Oncorhynchus mykiss]
gene17720	--	--	Cellular Component: integral component of membrane (GO:0016021);;	--	--	--	--	--	Uncharacterized protein C11orf87 homolog OS=Xenopus tropicalis OX=8364 PE=2 SV=1	S	Function unknown	uncharacterized protein C11orf87 homolog [Oncorhynchus mykiss]
Oncorhynchus_mykiss_newGene_45765	--	--	--	K15199|1.0145e-16|ola:101155747|K15199 general transcription factor 3C polypeptide 1 | (RefSeq) gtf3c1; general transcription factor IIIC subunit 1	--	[K]	Transcription	--	--	K	Transcription	PREDICTED: general transcription factor 3C polypeptide 1-like [Salmo salar]
gene34232	--	--	Cellular Component: integral component of membrane (GO:0016021);;	K20732|0|xma:102233242|K20732 transmembrane glycoprotein NMB | (RefSeq) gpnmb; glycoprotein nmb	--	--	--	PKD domain	Protein QNR-71 OS=Coturnix japonica OX=93934 GN=QNR-71 PE=2 SV=2	S	Function unknown	transmembrane glycoprotein NMB isoform X1 [Oncorhynchus mykiss]
gene33780	[O]	Posttranslational modification, protein turnover, chaperones	Molecular Function: threonine-type endopeptidase activity (GO:0004298);; Cellular Component: nucleus (GO:0005634);; Cellular Component: cytoplasm (GO:0005737);; Cellular Component: proteasome core complex (GO:0005839);; Biological Process: proteolysis involved in cellular protein catabolic process (GO:0051603);;	K02739|2.64585e-160|xma:102218986|K02739 20S proteasome subunit beta 2 [EC:3.4.25.1] | (RefSeq) proteasome subunit beta type-7-like	Proteasome (ko03050)	[O]	Posttranslational modification, protein turnover, chaperones	Proteasome subunit;; Proteasome beta subunits C terminal	Proteasome subunit beta type-9 OS=Salmo salar OX=8030 GN=psmb9-a PE=2 SV=1	O	Posttranslational modification, protein turnover, chaperones	proteasome subunit beta type-7-like [Oncorhynchus mykiss]
gene2364	--	--	Cellular Component: Elongator holoenzyme complex (GO:0033588);;	--	--	[S]	Function unknown	Elongation complex protein 6;; Elongation complex protein 6	Elongator complex protein 6 OS=Danio rerio OX=7955 GN=elp6 PE=2 SV=2	K	Transcription	elongator complex protein 6-like [Oncorhynchus mykiss]
gene50566	--	--	Cellular Component: integral component of membrane (GO:0016021);;	--	--	--	--	Serine incorporator (Serinc)	--	S	Function unknown	serine incorporator 4-like [Oncorhynchus mykiss]
gene50997	--	--	--	--	--	[O]	Posttranslational modification, protein turnover, chaperones	SPRY-associated domain;; Zinc finger, C3HC4 type (RING finger);; Zinc finger, C3HC4 type (RING finger);; zinc finger of C3HC4-type, RING;; Zinc finger, C3HC4 type (RING finger);; B-box zinc finger;; RING-type zinc-finger;; U-box domain	Zinc-binding protein A33 OS=Pleurodeles waltl OX=8319 PE=1 SV=2	S	Function unknown	tripartite motif-containing protein 35-like, partial [Oncorhynchus mykiss]
gene42363	--	--	Cellular Component: integral component of membrane (GO:0016021);;	--	--	--	--	CECR6/TMEM121 family	Transmembrane protein 121 OS=Gallus gallus OX=9031 GN=TMEM121 PE=2 SV=1	S	Function unknown	PREDICTED: transmembrane protein 121-like isoform X1 [Salmo salar]
gene22826	[P]	Inorganic ion transport and metabolism	Molecular Function: calcium-activated potassium channel activity (GO:0015269);; Cellular Component: integral component of membrane (GO:0016021);; Biological Process: potassium ion transmembrane transport (GO:0071805);;	K04947|0|dre:565691|K04947 potassium channel subfamily T member 2 | (RefSeq) potassium channel subfamily T member 2-like	--	[P]	Inorganic ion transport and metabolism	Calcium-activated BK potassium channel alpha subunit;; Ion channel	Potassium channel subfamily T member 1 OS=Gallus gallus OX=9031 GN=KCNT1 PE=1 SV=1	U	Intracellular trafficking, secretion, and vesicular transport	potassium channel subfamily T member 2-like [Oncorhynchus mykiss]
gene39683	--	--	Molecular Function: galanin receptor activity (GO:0004966);; Biological Process: neuropeptide signaling pathway (GO:0007218);; Cellular Component: integral component of membrane (GO:0016021);;	K04231|2.58498e-169|xma:102232678|K04231 galanin receptor 2 | (RefSeq) galanin receptor type 2-like	Neuroactive ligand-receptor interaction (ko04080)	[R]	General function prediction only	7 transmembrane receptor (rhodopsin family);; Serpentine type 7TM GPCR chemoreceptor Srw;; Serpentine type 7TM GPCR chemoreceptor Srv	G-protein coupled receptor 54 OS=Oreochromis niloticus OX=8128 GN=gpr54 PE=2 SV=1	U	Intracellular trafficking, secretion, and vesicular transport	galanin receptor type 2-like [Oncorhynchus mykiss]
gene13968	[Z]	Cytoskeleton	--	--	--	[Z]	Cytoskeleton	Actin	Actin, alpha cardiac muscle 1 OS=Xenopus laevis OX=8355 GN=actc1 PE=2 SV=1	Z	Cytoskeleton	uncharacterized protein LOC110529491 [Oncorhynchus mykiss]
gene8638	[O]	Posttranslational modification, protein turnover, chaperones	Molecular Function: ATP binding (GO:0005524);; Molecular Function: kinase activity (GO:0016301);; Biological Process: phosphorylation (GO:0016310);;	K00933|0|tru:101069967|K00933 creatine kinase [EC:2.7.3.2] | (RefSeq) ckmt2; creatine kinase, mitochondrial 2	Arginine and proline metabolism (ko00330)	[C]	Energy production and conversion	ATP:guanido phosphotransferase, C-terminal catalytic domain;; ATP:guanido phosphotransferase, N-terminal domain	Creatine kinase S-type, mitochondrial OS=Gallus gallus OX=9031 GN=CKMT2 PE=1 SV=2	E	Amino acid transport and metabolism	creatine kinase S-type, mitochondrial-like [Oncorhynchus kisutch]
gene26278	--	--	Cellular Component: endoplasmic reticulum (GO:0005783);; Biological Process: glycosaminoglycan biosynthetic process (GO:0006024);; Biological Process: heparan sulfate proteoglycan biosynthetic process (GO:0015012);; Molecular Function: glucuronosyltransferase activity (GO:0015020);; Cellular Component: integral component of membrane (GO:0016021);;	K02366|1.4308e-115|ola:101167217|K02366 glucuronyl/N-acetylglucosaminyl transferase EXT1 [EC:2.4.1.224 2.4.1.225] | (RefSeq) exostosin-1b-like	Glycosaminoglycan biosynthesis - heparan sulfate / heparin (ko00534)	[GMW]	Carbohydrate transport and metabolism;; Cell wall/membrane/envelope biogenesis;; Extracellular structures	Glycosyl transferase family 64 domain	Exostosin-1b OS=Danio rerio OX=7955 GN=ext1b PE=2 SV=1	S	Function unknown	exostosin-1b-like, partial [Oncorhynchus mykiss]
gene7990	[O]	Posttranslational modification, protein turnover, chaperones	Cellular Component: cell (GO:0005623);; Molecular Function: electron carrier activity (GO:0009055);; Molecular Function: protein disulfide oxidoreductase activity (GO:0015035);; Biological Process: cell redox homeostasis (GO:0045454);; Biological Process: oxidation-reduction process (GO:0055114);;	K05309|1.56172e-125|mze:101478781|K05309 microsomal prostaglandin-E synthase 2 [EC:5.3.99.3] | (RefSeq) ptges2; prostaglandin E synthase 2	Arachidonic acid metabolism (ko00590)	[R]	General function prediction only	Glutaredoxin;; Glutathione S-transferase, N-terminal domain;; Glutathione S-transferase, N-terminal domain;; Glutathione S-transferase, N-terminal domain	Prostaglandin E synthase 2 OS=Danio rerio OX=7955 GN=ptges2 PE=2 SV=1	I	Lipid transport and metabolism	prostaglandin E synthase 2-like isoform X1 [Oncorhynchus mykiss]
gene30828	[R]	General function prediction only	--	K09228|4.89881e-122|tup:102475152|K09228 KRAB domain-containing zinc finger protein | (RefSeq) ZNF180; zinc finger protein 180	--	[R]	General function prediction only	Zinc-finger double domain;; Zinc finger, C2H2 type;; C2H2-type zinc finger;; C2H2-type zinc finger;; Zinc ribbon domain;; Phorbol esters/diacylglycerol binding domain (C1 domain);; LYAR-type C2HC zinc finger	Oocyte zinc finger protein XlCOF6 (Fragment) OS=Xenopus laevis OX=8355 PE=3 SV=1	S	Function unknown	zinc finger protein 2 homolog [Oncorhynchus mykiss]
gene55132	--	--	--	--	--	--	--	--	--	S	Function unknown	PREDICTED: sperm-associated antigen 17-like, partial [Salmo salar]
gene45802	--	--	Biological Process: blood coagulation (GO:0007596);; Molecular Function: thrombin-activated receptor activity (GO:0015057);; Cellular Component: integral component of membrane (GO:0016021);; Biological Process: thrombin-activated receptor signaling pathway (GO:0070493);;	K03914|5.83314e-116|tru:101078307|K03914 coagulation factor II (thrombin) receptor | (RefSeq) proteinase-activated receptor 1-like	Calcium signaling pathway (ko04020);; Neuroactive ligand-receptor interaction (ko04080);; Endocytosis (ko04144);; Regulation of actin cytoskeleton (ko04810)	--	--	7 transmembrane receptor (rhodopsin family)	Proteinase-activated receptor 1 OS=Xenopus laevis OX=8355 GN=f2r PE=1 SV=1	U	Intracellular trafficking, secretion, and vesicular transport	proteinase-activated receptor 1-like [Oncorhynchus mykiss]
gene47238	--	--	Molecular Function: carbohydrate binding (GO:0030246);;	K17527|3.5956e-153|xma:102220362|K17527 intelectin | (RefSeq) intelectin-like	--	--	--	Fibrinogen beta and gamma chains, C-terminal globular domain	Intelectin OS=Oncorhynchus mykiss OX=8022 GN=itln PE=1 SV=1	S	Function unknown	intelectin-like [Oncorhynchus mykiss]
gene15653	--	--	Cellular Component: integral component of membrane (GO:0016021);;	K18261|1.33284e-51|xma:102221409|K18261 dysferlin | (RefSeq) dysf; dysferlin	--	[M]	Cell wall/membrane/envelope biogenesis	C2 domain	--	S	Function unknown	dysferlin-like [Oncorhynchus mykiss]
gene3232	[T]	Signal transduction mechanisms	Molecular Function: nucleotide binding (GO:0000166);; Molecular Function: IMP dehydrogenase activity (GO:0003938);; Cellular Component: nucleus (GO:0005634);; Cellular Component: cytoplasm (GO:0005737);; Biological Process: GMP biosynthetic process (GO:0006177);; Molecular Function: metal ion binding (GO:0046872);; Biological Process: oxidation-reduction process (GO:0055114);;	K00088|0|xma:102227261|K00088 IMP dehydrogenase [EC:1.1.1.205] | (RefSeq) impdh1; inosine monophosphate dehydrogenase 1	Purine metabolism (ko00230);; Drug metabolism - other enzymes (ko00983)	[F]	Nucleotide transport and metabolism	IMP dehydrogenase / GMP reductase domain;; CBS domain;; Nitronate monooxygenase;; FMN-dependent dehydrogenase;; Histidine biosynthesis protein	Inosine-5&apos;-monophosphate dehydrogenase 1a OS=Danio rerio OX=7955 GN=impdh1a PE=2 SV=1	S	Function unknown	inosine-5&apos;-monophosphate dehydrogenase 1b-like isoform X2 [Oncorhynchus mykiss]
gene43278	--	--	Molecular Function: zinc ion binding (GO:0008270);; Cellular Component: integral component of membrane (GO:0016021);; Molecular Function: ligase activity (GO:0016874);;	K10658|5.32357e-98|dre:791214|K10658 E3 ubiquitin-protein ligase MARCH3 [EC:2.3.2.27] | (RefSeq) si:cabz01068867.1; zgc:158785	--	[A]	RNA processing and modification	RING-variant domain	E3 ubiquitin-protein ligase MARCH3 OS=Xenopus tropicalis OX=8364 GN=march3 PE=2 SV=1	O	Posttranslational modification, protein turnover, chaperones	E3 ubiquitin-protein ligase MARCH3-like [Oncorhynchus mykiss]
gene27074	--	--	--	K04348|8.87308e-80|xma:102235928|K04348 serine/threonine-protein phosphatase 2B catalytic subunit [EC:3.1.3.16] | (RefSeq) serine/threonine-protein phosphatase 2B catalytic subunit alpha isoform-like	MAPK signaling pathway (ko04010);; Calcium signaling pathway (ko04020);; Oocyte meiosis (ko04114);; Wnt signaling pathway (ko04310);; VEGF signaling pathway (ko04370)	[R]	General function prediction only	--	--	T	Signal transduction mechanisms	serine/threonine-protein phosphatase 2B catalytic subunit alpha isoform-like [Oncorhynchus mykiss]
gene1788	--	--	--	K14827|0|mze:101481791|K14827 pre-rRNA-processing protein IPI1 | (RefSeq) tex10; testis expressed 10	--	[S]	Function unknown	Rix1 complex component involved in 60S ribosome maturation	Testis-expressed protein 10 homolog OS=Danio rerio OX=7955 GN=tex10 PE=2 SV=2	S	Function unknown	testis-expressed protein 10 homolog [Oncorhynchus mykiss]
gene13867	--	--	Cellular Component: extracellular region (GO:0005576);;	--	--	--	--	Zona pellucida-like domain	--	U	Intracellular trafficking, secretion, and vesicular transport	uncharacterized protein LOC110529392 isoform X1 [Oncorhynchus mykiss]
gene29011	--	--	Biological Process: phospholipid metabolic process (GO:0006644);; Molecular Function: N-methyltransferase activity (GO:0008170);; Cellular Component: integral component of membrane (GO:0016021);; Biological Process: methylation (GO:0032259);;	K00551|2.41095e-83|dre:393127|K00551 phosphatidylethanolamine N-methyltransferase [EC:2.1.1.17] | (RefSeq) pemt, zgc:55479; phosphatidylethanolamine N-methyltransferase	Glycerophospholipid metabolism (ko00564)	[I]	Lipid transport and metabolism	Phospholipid methyltransferase	--	I	Lipid transport and metabolism	unnamed protein product [Oncorhynchus mykiss]
Oncorhynchus_mykiss_newGene_60860	--	--	Biological Process: lymph vessel development (GO:0001945);; Biological Process: heart looping (GO:0001947);; Biological Process: sprouting angiogenesis (GO:0002040);; Biological Process: heart jogging (GO:0003146);; Molecular Function: transforming growth factor beta-activated receptor activity (GO:0005024);; Molecular Function: binding (GO:0005488);; Biological Process: phosphorylation (GO:00163…	K04671|3.88171e-101|dre:555655|K04671 bone morphogenetic protein receptor type-2 [EC:2.7.11.30] | (RefSeq) bmpr2b; bone morphogenetic protein receptor, type II b (serine/threonine kinase)	Cytokine-cytokine receptor interaction (ko04060);; TGF-beta signaling pathway (ko04350)	[T]	Signal transduction mechanisms	--	--	T	Signal transduction mechanisms	LOW QUALITY PROTEIN: bone morphogenetic protein receptor type-2-like, partial [Oncorhynchus kisutch]
gene1158	--	--	Cellular Component: nucleus (GO:0005634);;	--	--	--	--	Cyclin, C-terminal domain;; Cyclin, N-terminal domain	Cyclin-J OS=Xenopus laevis OX=8355 GN=ccnj PE=2 SV=1	D	Cell cycle control, cell division, chromosome partitioning	cyclin-J isoform X1 [Oncorhynchus mykiss]
Oncorhynchus_mykiss_newGene_35084	--	--	--	K03155|5.50713e-81|mze:101478453|K03155 timeless | (RefSeq) timeless; timeless circadian clock	--	[L]	Replication, recombination and repair	Timeless protein C terminal region;; Timeless protein C terminal region	--	K	Transcription	protein timeless homolog [Salvelinus alpinus]
gene13594	--	--	--	K08826|3.79226e-55|ola:101164719|K08826 homeodomain interacting protein kinase [EC:2.7.11.1] | (RefSeq) homeodomain-interacting protein kinase 1-like	--	[R]	General function prediction only	--	--	T	Signal transduction mechanisms	homeodomain-interacting protein kinase 1-like [Oncorhynchus mykiss]
gene4373	[C]	Energy production and conversion	Molecular Function: NADH dehydrogenase (ubiquinone) activity (GO:0008137);; Molecular Function: FMN binding (GO:0010181);; Molecular Function: NAD binding (GO:0051287);; Molecular Function: 4 iron, 4 sulfur cluster binding (GO:0051539);; Biological Process: oxidation-reduction process (GO:0055114);;	K03942|0|mze:101485676|K03942 NADH dehydrogenase (ubiquinone) flavoprotein 1 [EC:1.6.5.3 1.6.99.3] | (RefSeq) NADH dehydrogenase [ubiquinone] flavoprotein 1, mitochondrial-like	Oxidative phosphorylation (ko00190)	[C]	Energy production and conversion	Respiratory-chain NADH dehydrogenase 51 Kd subunit;; NADH-ubiquinone oxidoreductase-F iron-sulfur binding region;; SLBB domain	--	C	Energy production and conversion	NADH dehydrogenase [ubiquinone] flavoprotein 1, mitochondrial-like [Oncorhynchus mykiss]
gene22920	--	--	--	--	--	--	--	von Willebrand factor type A domain;; von Willebrand factor type A domain	--	S	Function unknown	von Willebrand factor A domain-containing protein 3A [Oncorhynchus kisutch]
gene19184	--	--	Molecular Function: motor activity (GO:0003774);; Molecular Function: actin binding (GO:0003779);; Molecular Function: ATP binding (GO:0005524);; Cellular Component: myosin complex (GO:0016459);;	K17751|1.07055e-63|xma:102230019|K17751 myosin heavy chain 6/7 | (RefSeq) myosin-6	Cardiac muscle contraction (ko04260);; Adrenergic signaling in cardiomyocytes (ko04261);; Tight junction (ko04530)	[Z]	Cytoskeleton	Myosin head (motor domain)	Myosin heavy chain, fast skeletal muscle OS=Cyprinus carpio OX=7962 PE=2 SV=2	Z	Cytoskeleton	PREDICTED: myosin-6-like, partial [Salmo salar]
gene19125	--	--	Molecular Function: translation elongation factor activity (GO:0003746);; Molecular Function: ubiquitin-protein transferase activity (GO:0004842);; Biological Process: translational elongation (GO:0006414);; Biological Process: positive regulation of transcription elongation from RNA polymerase II promoter (GO:0032968);; Biological Process: protein ubiquitination involved in ubiquitin-dependent p…	K03872|4.21986e-76|xtr:549174|K03872 transcription elongation factor B, polypeptide 1 | (RefSeq) eloc, tceb1; elongin C	Ubiquitin mediated proteolysis (ko04120)	[K]	Transcription	Skp1 family, tetramerisation domain	--	K	Transcription	unnamed protein product, partial [Oncorhynchus mykiss]
Oncorhynchus_mykiss_newGene_4160	[Q]	Secondary metabolites biosynthesis, transport and catabolism	Molecular Function: DNA binding (GO:0003677);; Molecular Function: mRNA 3'-UTR binding (GO:0003730);; Biological Process: transposition, DNA-mediated (GO:0006313);; Molecular Function: zinc ion binding (GO:0008270);; Biological Process: posttranscriptional regulation of gene expression (GO:0010608);; Biological Process: DNA integration (GO:0015074);; Cellular Component: membrane (GO:0016020);; Bi…	--	--	--	--	--	--	S	Function unknown	unnamed protein product [Oncorhynchus mykiss]
gene47354	--	--	Molecular Function: GTPase activator activity (GO:0005096);; Biological Process: positive regulation of GTPase activity (GO:0043547);;	K12489|1.14067e-80|dre:100009646|K12489 Arf-GAP with coiled-coil, ANK repeat and PH domain-containing protein | (RefSeq) acap3b, zgc:158388; ArfGAP with coiled-coil, ankyrin repeat and PH domains 3b	Endocytosis (ko04144)	[T]	Signal transduction mechanisms	Putative GTPase activating protein for Arf	Arf-GAP with coiled-coil, ANK repeat and PH domain-containing protein 2 OS=Gallus gallus OX=9031 GN=ACAP2 PE=2 SV=1	U	Intracellular trafficking, secretion, and vesicular transport	arf-GAP with coiled-coil, ANK repeat and PH domain-containing protein 3-like [Oncorhynchus mykiss]
gene42685	[R]	General function prediction only	--	K17985|0|lcm:102357663|K17985 activating molecule in BECN1-regulated autophagy protein 1 | (RefSeq) AMBRA1; autophagy and beclin 1 regulator 1	--	[T]	Signal transduction mechanisms	7 transmembrane receptor (rhodopsin family);; WD domain, G-beta repeat;; Serpentine type 7TM GPCR chemoreceptor Srsx	Muscarinic acetylcholine receptor M4 OS=Gallus gallus OX=9031 GN=CHRM4 PE=2 SV=1	S	Function unknown	activating molecule in BECN1-regulated autophagy protein 1-like isoform X1 [Oncorhynchus mykiss]
Oncorhynchus_mykiss_newGene_66416	--	--	Cellular Component: ruffle (GO:0001726);; Molecular Function: protein kinase activity (GO:0004672);; Molecular Function: structural constituent of cytoskeleton (GO:0005200);; Molecular Function: inorganic anion exchanger activity (GO:0005452);; Molecular Function: calcium ion binding (GO:0005509);; Molecular Function: ATP binding (GO:0005524);; Cellular Component: focal adhesion (GO:0005925);; Bi…	--	--	--	--	--	--	--	--	PREDICTED: uncharacterized protein K02A2.6-like [Salmo salar]
gene4236	--	--	Cellular Component: integral component of membrane (GO:0016021);;	--	--	--	--	--	--	U	Intracellular trafficking, secretion, and vesicular transport	claudin-12-like [Oncorhynchus mykiss]
gene45400	[T]	Signal transduction mechanisms	Molecular Function: protein serine/threonine kinase activity (GO:0004674);; Molecular Function: ATP binding (GO:0005524);; Biological Process: phosphorylation (GO:0016310);;	K07178|1.7692e-165|dre:406268|K07178 RIO kinase 1 [EC:2.7.11.1] | (RefSeq) riok1, fb99f04, wu:fb99f04, zgc:56195; RIO kinase 1 (yeast)	Ribosome biogenesis in eukaryotes (ko03008)	[TD]	Signal transduction mechanisms;; Cell cycle control, cell division, chromosome partitioning	RIO1 family	--	T	Signal transduction mechanisms	serine/threonine-protein kinase RIO1 [Oncorhynchus mykiss]
gene31721	--	--	Biological Process: gastrulation (GO:0007369);; Biological Process: convergent extension (GO:0060026);;	--	--	--	--	PH domain;; PH domain	Differentially expressed in FDCP 6 homolog OS=Danio rerio OX=7955 GN=def6 PE=2 SV=1	S	Function unknown	differentially expressed in FDCP 6 homolog [Oncorhynchus mykiss]
gene46022	--	--	--	--	--	--	--	Protein of unknown function (DUF2475)	Protein FAM166B OS=Danio rerio OX=7955 GN=fam166b PE=2 SV=1	S	Function unknown	protein FAM166B-like [Oncorhynchus mykiss]
Oncorhynchus_mykiss_newGene_2961	[H]	Coenzyme transport and metabolism	--	--	--	--	--	--	--	--	--	--
gene4069	[R]	General function prediction only	Molecular Function: binding (GO:0005488);; Molecular Function: hydrolase activity (GO:0016787);;	K01122|2.78788e-150|mze:101467357|K01122 ectonucleotide pyrophosphatase/phosphodiesterase family member 2 [EC:3.1.4.39] | (RefSeq) enpp2; ectonucleotide pyrophosphatase/phosphodiesterase 2	Ether lipid metabolism (ko00565)	[R]	General function prediction only	Type I phosphodiesterase / nucleotide pyrophosphatase;; Somatomedin B domain	Venom phosphodiesterase 2 OS=Crotalus adamanteus OX=8729 PE=1 SV=1	S	Function unknown	ectonucleotide pyrophosphatase/phosphodiesterase family member 2-like [Oncorhynchus mykiss]
gene1376	[G]	Carbohydrate transport and metabolism	--	K18622|0|mze:101484045|K18622 adducin | (RefSeq) gamma-adducin-like	--	[TZ]	Signal transduction mechanisms;; Cytoskeleton	Class II Aldolase and Adducin N-terminal domain	--	G	Carbohydrate transport and metabolism	gamma-adducin [Oncorhynchus mykiss]
gene23533	[E]	Amino acid transport and metabolism	Molecular Function: aminopeptidase activity (GO:0004177);; Biological Process: proteolysis (GO:0006508);; Molecular Function: metal ion binding (GO:0046872);;	K01262|4.29303e-128|dre:406253|K01262 Xaa-Pro aminopeptidase [EC:3.4.11.9] | (RefSeq) xpnpep1, fa02e02, wu:fa02e02, zgc:56366, zgc:77772; X-prolyl aminopeptidase (aminopeptidase P) 1, soluble	--	[E]	Amino acid transport and metabolism	Metallopeptidase family M24;; C-terminal region of peptidase_M24;; Creatinase/Prolidase N-terminal domain;; Creatinase/Prolidase N-terminal domain	--	E	Amino acid transport and metabolism	xaa-Pro aminopeptidase 1-like [Oncorhynchus mykiss]
gene25006	--	--	Biological Process: insulin receptor signaling pathway (GO:0008286);; Biological Process: regulation of actin filament polymerization (GO:0030833);; Cellular Component: intracellular part (GO:0044424);; Biological Process: positive regulation of cytoskeleton organization (GO:0051495);;	K20127|3.54073e-176|dre:550528|K20127 BAI1-associated protein 2-like protein | (RefSeq) baiap2l1b, zgc:110192; BAI1-associated protein 2-like 1b	--	--	--	IRSp53/MIM homology domain;; Variant SH3 domain;; Variant SH3 domain;; SH3 domain	Brain-specific angiogenesis inhibitor 1-associated protein 2-like protein 2 OS=Danio rerio OX=7955 GN=baiap2l2 PE=3 SV=1	Z	Cytoskeleton	brain-specific angiogenesis inhibitor 1-associated protein 2-like protein 1 [Oncorhynchus mykiss]
gene43081	[R]	General function prediction only	Molecular Function: nucleic acid binding (GO:0003676);; Molecular Function: metal ion binding (GO:0046872);;	K20828|0|ola:101160405|K20828 zinc finger protein 143/76 | (RefSeq) znf143; zinc finger protein 143	--	[R]	General function prediction only	Zinc-finger double domain;; Zinc finger, C2H2 type;; C2H2-type zinc finger;; Copper resistance protein K;; Zinc-finger double-stranded RNA-binding	Zinc finger protein 143 OS=Danio rerio OX=7955 GN=znf143 PE=2 SV=2	S	Function unknown	zinc finger protein 143-like isoform X1 [Oncorhynchus mykiss]
gene10536	--	--	Molecular Function: DNA binding (GO:0003677);; Cellular Component: integral component of membrane (GO:0016021);;	--	--	[K]	Transcription	--	--	S	Function unknown	SET-binding protein [Oncorhynchus mykiss]
gene45395	--	--	Molecular Function: protein serine/threonine kinase activity (GO:0004674);; Molecular Function: ATP binding (GO:0005524);; Cellular Component: cytosol (GO:0005829);; Biological Process: protein phosphorylation (GO:0006468);; Biological Process: ER to Golgi vesicle-mediated transport (GO:0006888);; Cellular Component: endomembrane system (GO:0012505);; Biological Process: intracellular signal tran…	K08875|0|dre:564177|K08875 nuclear receptor-binding protein | (RefSeq) nrbp2a, nrbp2; nuclear receptor binding protein 2a	--	[T]	Signal transduction mechanisms	Protein tyrosine kinase;; Protein kinase domain	--	S	Function unknown	nuclear receptor-binding protein 2-like isoform X1 [Oncorhynchus kisutch]
gene2878	[R]	General function prediction only	Molecular Function: GTP binding (GO:0005525);; Cellular Component: intracellular (GO:0005622);; Biological Process: small GTPase mediated signal transduction (GO:0007264);;	K17047|2.60861e-125|mze:101478292|K17047 Ras-related protein Rab-19 | (RefSeq) ras-related protein Rab-19-like	--	[TU]	Signal transduction mechanisms;; Intracellular trafficking, secretion, and vesicular transport	Ras family;; Ras of Complex, Roc, domain of DAPkinase;; ADP-ribosylation factor family;; Gtr1/RagA G protein conserved region	Ras-related protein Rab-19 OS=Xenopus tropicalis OX=8364 GN=rab19 PE=2 SV=1	S	Function unknown	ras-related protein Rab-19-like isoform X1 [Oncorhynchus kisutch]
gene51279	--	--	Molecular Function: mRNA binding (GO:0003729);; Cellular Component: U1 snRNP (GO:0005685);; Biological Process: mRNA splice site selection (GO:0006376);; Cellular Component: U2-type prespliceosome (GO:0071004);;	--	--	[A]	RNA processing and modification	LUC7 N_terminus	--	A	RNA processing and modification	luc7-like protein 3 isoform X1 [Oncorhynchus mykiss]
gene6480	[T]	Signal transduction mechanisms	Biological Process: peptidyl-lysine modification to peptidyl-hypusine (GO:0008612);; Cellular Component: integral component of membrane (GO:0016021);; Molecular Function: deoxyhypusine monooxygenase activity (GO:0019135);; Molecular Function: metal ion binding (GO:0046872);; Biological Process: oxidation-reduction process (GO:0055114);;	K06072|0|dre:321732|K06072 deoxyhypusine monooxygenase [EC:1.14.99.29] | (RefSeq) dohh, fb33c04, hlrc1, wu:fb33c04, zgc:56338; deoxyhypusine hydroxylase/monooxygenase	--	[R]	General function prediction only	HEAT repeats;; PBS lyase HEAT-like repeat;; HEAT repeat	Deoxyhypusine hydroxylase OS=Danio rerio OX=7955 GN=dohh PE=2 SV=1	C	Energy production and conversion	deoxyhypusine hydroxylase [Oncorhynchus mykiss]
gene8531	[O]	Posttranslational modification, protein turnover, chaperones	Molecular Function: iron ion binding (GO:0005506);; Biological Process: iron-sulfur cluster assembly (GO:0016226);; Molecular Function: iron-sulfur cluster binding (GO:0051536);;	--	--	[C]	Energy production and conversion	NifU-like N terminal domain	--	C	Energy production and conversion	iron-sulfur cluster scaffold protein b [Oncorhynchus mykiss]
gene34221	--	--	--	--	--	--	--	Calcium binding and coiled-coil domain (CALCOCO1) like	Tax1-binding protein 1 homolog B OS=Danio rerio OX=7955 GN=tax1bp1b PE=2 SV=3	S	Function unknown	tax1-binding protein 1 homolog A-like [Oncorhynchus mykiss]
Oncorhynchus_mykiss_newGene_48409	--	--	--	--	--	--	--	--	--	S	Function unknown	unnamed protein product, partial [Oncorhynchus mykiss]
gene37578	--	--	--	K07187|0|mze:101476715|K07187 insulin receptor substrate 2 | (RefSeq) insulin receptor substrate 2-B	FoxO signaling pathway (ko04068);; Insulin signaling pathway (ko04910);; Adipocytokine signaling pathway (ko04920)	--	--	PTB domain (IRS-1 type);; PH domain	Insulin receptor substrate 2-B OS=Xenopus laevis OX=8355 GN=irs2-b PE=2 SV=1	T	Signal transduction mechanisms	insulin receptor substrate 2-B-like [Oncorhynchus mykiss]
gene20655	[O]	Posttranslational modification, protein turnover, chaperones	Molecular Function: serine-type endopeptidase activity (GO:0004252);; Biological Process: proteolysis (GO:0006508);;	K01352|3.70726e-87|mze:101479592|K01352 granzyme A [EC:3.4.21.78] | (RefSeq) granzyme A-like	Neuroactive ligand-receptor interaction (ko04080)	[E]	Amino acid transport and metabolism	Trypsin;; Trypsin-like peptidase domain;; Domain of unknown function (DUF1986)	Trypsin II-P29 OS=Gallus gallus OX=9031 PE=2 SV=1	O	Posttranslational modification, protein turnover, chaperones	granzyme A-like isoform X1 [Oncorhynchus mykiss]
gene27582	--	--	Biological Process: regulation of cell growth (GO:0001558);; Molecular Function: actin binding (GO:0003779);; Molecular Function: structural molecule activity (GO:0005198);; Cellular Component: cytoplasm (GO:0005737);; Cellular Component: cytoskeleton (GO:0005856);; Cellular Component: plasma membrane (GO:0005886);; Cellular Component: cell-cell junction (GO:0005911);; Biological Process: cytoske…	K06107|0|lcm:102354711|K06107 erythrocyte membrane protein band 4.1 | (RefSeq) EPB41L3; erythrocyte membrane protein band 4.1 like 3	Tight junction (ko04530)	[R]	General function prediction only	4.1 protein C-terminal domain (CTD);; FERM C-terminal PH-like domain;; SAB domain;; FERM central domain;; FERM adjacent (FA);; FERM N-terminal domain	Cytoskeletal protein 4.1 OS=Xenopus laevis OX=8355 GN=epb41 PE=2 SV=1	S	Function unknown	band 4.1-like protein 3 isoform X2 [Oncorhynchus mykiss]
gene22199	--	--	Biological Process: cell fate specification (GO:0001708);; Molecular Function: transcription factor activity, sequence-specific DNA binding (GO:0003700);; Cellular Component: nucleus (GO:0005634);; Biological Process: regulation of transcription, DNA-templated (GO:0006355);; Biological Process: brain development (GO:0007420);; Molecular Function: sequence-specific DNA binding (GO:0043565);;	K09305|4.40013e-168|dre:30317|K09305 homeobox protein HoxA/B/C5 | (RefSeq) hoxb5a, ZF-21, ZF21, hox-2.1, hox-B5, hoxb5, wu:fc38c09, z-18; homeobox B5a	--	[R]	General function prediction only	Homeobox domain	Homeobox protein Hox-B5a OS=Danio rerio OX=7955 GN=hoxb5a PE=2 SV=2	K	Transcription	homeobox protein Hox-B5a [Oncorhynchus mykiss]
Oncorhynchus_mykiss_newGene_59104	--	--	Molecular Function: nucleic acid binding (GO:0003676);;	--	--	--	--	--	--	--	--	uncharacterized protein LOC110494027 isoform X1 [Oncorhynchus mykiss]
Oncorhynchus_mykiss_newGene_45501	--	--	Molecular Function: protein disulfide isomerase activity (GO:0003756);; Cellular Component: endoplasmic reticulum (GO:0005783);; Biological Process: protein folding (GO:0006457);; Cellular Component: cell surface (GO:0009986);; Biological Process: response to endoplasmic reticulum stress (GO:0034976);; Biological Process: cell redox homeostasis (GO:0045454);;	K08056|1.77329e-42|dre:405841|K08056 protein disulfide isomerase family A, member 3 [EC:5.3.4.1] | (RefSeq) zgc:77086	Protein processing in endoplasmic reticulum (ko04141)	[O]	Posttranslational modification, protein turnover, chaperones	--	Protein disulfide-isomerase A3 OS=Gallus gallus OX=9031 GN=PDIA3 PE=2 SV=1	O	Posttranslational modification, protein turnover, chaperones	protein disulfide-isomerase A3 [Salvelinus alpinus]
gene40240	--	--	Molecular Function: metalloendopeptidase activity (GO:0004222);; Cellular Component: proteinaceous extracellular matrix (GO:0005578);; Biological Process: proteolysis (GO:0006508);; Molecular Function: zinc ion binding (GO:0008270);;	K08623|0|mze:101469870|K08623 a disintegrin and metalloproteinase with thrombospondin motifs 8 [EC:3.4.24.-] | (RefSeq) adamts8; ADAM metallopeptidase with thrombospondin type 1 motif 8	--	[O]	Posttranslational modification, protein turnover, chaperones	ADAM-TS Spacer 1;; Reprolysin family propeptide;; Reprolysin (M12B) family zinc metalloprotease;; Thrombospondin type 1 domain;; Metallo-peptidase family M12B Reprolysin-like;; Metallo-peptidase family M12	Zinc metalloproteinase/disintegrin OS=Gloydius saxatilis OX=92067 PE=2 SV=1	O	Posttranslational modification, protein turnover, chaperones	A disintegrin and metalloproteinase with thrombospondin motifs 8-like [Oncorhynchus mykiss]
gene16908	--	--	Molecular Function: actin binding (GO:0003779);; Molecular Function: tropomyosin binding (GO:0005523);; Biological Process: muscle contraction (GO:0006936);; Biological Process: pointed-end actin filament capping (GO:0051694);;	--	--	[Z]	Cytoskeleton	Tropomodulin	Leiomodin-2 OS=Gallus gallus OX=9031 GN=LMOD2 PE=1 SV=2	S	Function unknown	leiomodin-1-like [Oncorhynchus mykiss]
Oncorhynchus_mykiss_newGene_49581	--	--	Molecular Function: protein kinase activity (GO:0004672);; Molecular Function: calcium ion binding (GO:0005509);; Molecular Function: ATP binding (GO:0005524);; Biological Process: protein phosphorylation (GO:0006468);;	--	--	--	--	--	--	--	--	unnamed protein product [Oncorhynchus mykiss]
gene6690	--	--	Cellular Component: integral component of membrane (GO:0016021);;	K05843|0|dre:100332594|K05843 transforming growth factor, beta receptor III | (RefSeq) tgfbr3, si:ch73-18k18.1; transforming growth factor, beta receptor III	--	--	--	Zona pellucida-like domain	--	U	Intracellular trafficking, secretion, and vesicular transport	transforming growth factor beta receptor type 3-like [Oncorhynchus mykiss]
gene54183	--	--	--	--	--	[RP]	General function prediction only;; Inorganic ion transport and metabolism	--	--	S	Function unknown	von Willebrand factor A domain-containing protein 7-like, partial [Oncorhynchus mykiss]
gene18944	[M]	Cell wall/membrane/envelope biogenesis	Cellular Component: integral component of membrane (GO:0016021);;	--	--	[TV]	Signal transduction mechanisms;; Defense mechanisms	Lectin C-type domain	Lactose-binding lectin l-2 OS=Anguilla japonica OX=7937 GN=l-2 PE=1 SV=2	S	Function unknown	C-type lectin domain family 4 member M-like [Oncorhynchus mykiss]
gene26841	--	--	Biological Process: nuclear-transcribed mRNA catabolic process, nonsense-mediated decay (GO:0000184);; Molecular Function: RNA cap binding (GO:0000339);; Cellular Component: nucleus (GO:0005634);; Cellular Component: cytoplasm (GO:0005737);; Cellular Component: nuclear cap binding complex (GO:0005846);; Biological Process: 7-methylguanosine mRNA capping (GO:0006370);; Biological Process: mRNA exp…	K12882|0|mze:101468950|K12882 nuclear cap-binding protein subunit 1 | (RefSeq) ncbp1; nuclear cap binding protein subunit 1	RNA transport (ko03013);; mRNA surveillance pathway (ko03015);; Spliceosome (ko03040)	[A]	RNA processing and modification	MIF4G like;; MIF4G like;; MIF4G domain	Nuclear cap-binding protein subunit 1 OS=Salmo salar OX=8030 GN=ncbp1 PE=2 SV=1	A	RNA processing and modification	nuclear cap-binding protein subunit 1 isoform X1 [Oncorhynchus mykiss]
gene17618	--	--	Cellular Component: cytoplasm (GO:0005737);; Molecular Function: superoxide-generating NADPH oxidase activity (GO:0016175);; Molecular Function: phosphatidylinositol binding (GO:0035091);; Biological Process: response to peptide hormone (GO:0043434);; Biological Process: oxidation-reduction process (GO:0055114);; Biological Process: cellular response to lipopolysaccharide (GO:0071222);;	K08011|0|tru:445890|K08011 neutrophil cytosolic factor 1 | (RefSeq) ncf1, p47phox; neutrophil cytosolic factor 1	Phagosome (ko04145)	[C]	Energy production and conversion	SH3 domain;; SH3 terminal domain of 2nd SH3 on Neutrophil cytosol factor 1;; Variant SH3 domain;; Variant SH3 domain;; PX domain	SH3 and PX domain-containing protein 2A OS=Danio rerio OX=7955 GN=sh3pxd2a PE=3 SV=2	A	RNA processing and modification	neutrophil cytosolic factor 1 isoform X2 [Salvelinus alpinus]
Oncorhynchus_mykiss_newGene_66580	--	--	Molecular Function: FMN binding (GO:0010181);; Biological Process: oxidation-reduction process (GO:0055114);;	K15449|4.59416e-13|dre:562076|K15449 tRNA wybutosine-synthesizing protein 1 [EC:4.1.3.44] | (RefSeq) tyw1, im:6898509, wu:fb74d01, zgc:153368; tRNA-yW synthesizing protein 1 homolog (S. cerevisiae)	--	--	--	--	S-adenosyl-L-methionine-dependent tRNA 4-demethylwyosine synthase OS=Danio rerio OX=7955 GN=tyw1 PE=2 SV=1	C	Energy production and conversion	unnamed protein product [Oncorhynchus mykiss]
gene40369	--	--	--	K16756|1.70209e-134|mze:101469340|K16756 coiled-coil domain-containing protein 64 | (RefSeq) bicaudal D-related protein 1-like	--	--	--	--	BICD family-like cargo adapter 2 OS=Xenopus laevis OX=8355 GN=bicdl2 PE=2 SV=1	S	Function unknown	BICD family-like cargo adapter 1 isoform X1 [Oncorhynchus mykiss]
gene31272	--	--	Molecular Function: signal recognition particle binding (GO:0005047);; Cellular Component: signal recognition particle, endoplasmic reticulum targeting (GO:0005786);; Biological Process: SRP-dependent cotranslational protein targeting to membrane (GO:0006614);; Molecular Function: 7S RNA binding (GO:0008312);; Molecular Function: endoplasmic reticulum signal peptide binding (GO:0030942);;	K03107|0|mze:101470543|K03107 signal recognition particle subunit SRP68 | (RefSeq) srp68; signal recognition particle 68	Protein export (ko03060)	[U]	Intracellular trafficking, secretion, and vesicular transport	RNA-binding signal recognition particle 68	--	U	Intracellular trafficking, secretion, and vesicular transport	signal recognition particle subunit SRP68-like [Oncorhynchus mykiss]
gene30450	[R]	General function prediction only	Molecular Function: ARF guanyl-nucleotide exchange factor activity (GO:0005086);; Biological Process: regulation of ARF protein signal transduction (GO:0032012);; Biological Process: positive regulation of GTPase activity (GO:0043547);;	K18442|0|dre:100334572|K18442 brefeldin A-inhibited guanine nucleotide-exchange protein | (RefSeq) arfgef2, si:dkey-192i18.4; ADP-ribosylation factor guanine nucleotide-exchange factor 2 (brefeldin A-inhibited)	Endocytosis (ko04144)	[U]	Intracellular trafficking, secretion, and vesicular transport	Sec7 domain;; Dimerisation and cyclophilin-binding domain of Mon2;; Domain of unknown function (DUF1981)	--	S	Function unknown	brefeldin A-inhibited guanine nucleotide-exchange protein 2-like [Oncorhynchus mykiss]
gene9983	--	--	Cellular Component: integral component of membrane (GO:0016021);;	--	--	--	--	MAC/Perforin domain	--	U	Intracellular trafficking, secretion, and vesicular transport	macrophage-expressed gene 1 protein [Oncorhynchus mykiss]
gene10901	[G]	Carbohydrate transport and metabolism	Biological Process: drug transmembrane transport (GO:0006855);; Molecular Function: drug transmembrane transporter activity (GO:0015238);; Cellular Component: integral component of membrane (GO:0016021);;	K08155|0|mze:101478189|K08155 MFS transporter, DHA1 family, solute carrier family 18 (vesicular amine transporter), member 1/2 | (RefSeq) slc18a1; solute carrier family 18 member A1	--	[U]	Intracellular trafficking, secretion, and vesicular transport	Major Facilitator Superfamily;; Sugar (and other) transporter	Vesicular acetylcholine transporter OS=Torpedo marmorata OX=7788 PE=2 SV=2	U	Intracellular trafficking, secretion, and vesicular transport	chromaffin granule amine transporter-like isoform X1 [Oncorhynchus mykiss]
gene52609	--	--	--	--	--	--	--	AIG1 family;; 50S ribosome-binding GTPase	--	S	Function unknown	GTPase IMAP family member 4-like [Oncorhynchus mykiss]
gene35307	[E]	Amino acid transport and metabolism	Biological Process: amino acid transmembrane transport (GO:0003333);; Molecular Function: amino acid transmembrane transporter activity (GO:0015171);; Cellular Component: integral component of membrane (GO:0016021);;	--	--	[E]	Amino acid transport and metabolism	Amino acid permease;; Amino acid permease	Y+L amino acid transporter 2 OS=Danio rerio OX=7955 GN=slc7a6 PE=2 SV=1	E	Amino acid transport and metabolism	b(0,+)-type amino acid transporter 1-like isoform X2 [Oncorhynchus mykiss]
gene23643	--	--	Molecular Function: GTP binding (GO:0005525);; Cellular Component: cytoplasm (GO:0005737);; Biological Process: cell cycle (GO:0007049);;	K16938|0|dre:554123|K16938 septin 3/9/12 | (RefSeq) sept3, zgc:110051; septin 3	--	[DTZ]	Cell cycle control, cell division, chromosome partitioning;; Signal transduction mechanisms;; Cytoskeleton	Septin;; 50S ribosome-binding GTPase;; Dynamin family	Neuronal-specific septin-3 OS=Danio rerio OX=7955 GN=sept3 PE=2 SV=1	DZ	Cell cycle control, cell division, chromosome partitioning;; Cytoskeleton	neuronal-specific septin-3 [Oncorhynchus mykiss]
gene46553	[L]	Replication, recombination and repair	--	K14779|1.64691e-78|rro:104672987|K14779 ATP-dependent RNA helicase DDX52/ROK1 [EC:3.6.4.13] | (RefSeq) DDX52; DExD-box helicase 52	--	[A]	RNA processing and modification	Helicase conserved C-terminal domain;; DEAD/DEAH box helicase	Eukaryotic initiation factor 4A-II OS=Gallus gallus OX=9031 GN=EIF4A2 PE=2 SV=1	L	Replication, recombination and repair	probable ATP-dependent RNA helicase DDX52 [Oncorhynchus mykiss]
gene23538	--	--	Biological Process: atrioventricular valve development (GO:0003171);;	K16865|9.82826e-109|mze:101473860|K16865 programmed cell death protein 4 | (RefSeq) pdcd4; programmed cell death 4	--	[T]	Signal transduction mechanisms	MA3 domain	Programmed cell death protein 4 OS=Gallus gallus OX=9031 GN=PDCD4 PE=2 SV=1	S	Function unknown	programmed cell death protein 4-like [Oncorhynchus mykiss]
gene13194	--	--	--	K09268|2.11303e-87|dre:562381|K09268 transcription factor SOX4/11/12 (SOX group C) | (RefSeq) sox12, si:dkey-76p14.4, zK76P14.4; SRY (sex determining region Y)-box 12	--	[K]	Transcription	HMG (high mobility group) box;; HMG-box domain	Transcription factor Sox-11-B OS=Xenopus laevis OX=8355 GN=sox11-b PE=1 SV=2	B	Chromatin structure and dynamics	transcription factor SOX-4-like [Oncorhynchus mykiss]
gene36487	--	--	--	--	--	--	--	--	--	S	Function unknown	coiled-coil domain-containing protein 57 isoform X1 [Oncorhynchus mykiss]
gene21330	[I]	Lipid transport and metabolism	Molecular Function: phospholipase D activity (GO:0004630);; Cellular Component: intracellular (GO:0005622);; Biological Process: phosphatidic acid biosynthetic process (GO:0006654);; Biological Process: regulation of cell migration (GO:0030334);; Molecular Function: phosphatidylinositol binding (GO:0035091);; Biological Process: inositol lipid-mediated signaling (GO:0048017);; Biological Process:…	K01115|0|tru:101066278|K01115 phospholipase D1/2 [EC:3.1.4.4] | (RefSeq) pld2; phospholipase D2	Glycerophospholipid metabolism (ko00564);; Ether lipid metabolism (ko00565);; Endocytosis (ko04144);; GnRH signaling pathway (ko04912)	[I]	Lipid transport and metabolism	PX domain;; PLD-like domain;; Phospholipase D Active site motif	--	I	Lipid transport and metabolism	phospholipase D2-like [Oncorhynchus mykiss]
gene16391	--	--	--	--	--	[K]	Transcription	SSXT protein (N-terminal region)	Calcium-responsive transactivator OS=Xenopus laevis OX=8355 GN=ss18l1 PE=2 SV=1	K	Transcription	calcium-responsive transactivator-like isoform X7 [Oncorhynchus mykiss]
gene16905	--	--	Biological Process: regulation of cell cycle (GO:0051726);;	--	--	[D]	Cell cycle control, cell division, chromosome partitioning	Cyclin, N-terminal domain	--	O	Posttranslational modification, protein turnover, chaperones	CDK5 and ABL1 enzyme substrate 2-like isoform X1 [Oncorhynchus mykiss]
Oncorhynchus_mykiss_newGene_50280	--	--	--	--	--	--	--	--	--	--	--	unnamed protein product [Oncorhynchus mykiss]
gene11661	--	--	Molecular Function: carnitine O-palmitoyltransferase activity (GO:0004095);; Cellular Component: integral component of membrane (GO:0016021);;	K08765|5.95329e-76|mze:101469965|K08765 carnitine O-palmitoyltransferase 1, liver isoform [EC:2.3.1.21] | (RefSeq) carnitine O-palmitoyltransferase 1, liver isoform-like	Fatty acid degradation (ko00071);; Fatty acid metabolism (ko01212);; PPAR signaling pathway (ko03320);; Adipocytokine signaling pathway (ko04920)	[I]	Lipid transport and metabolism	Choline/Carnitine o-acyltransferase	Carnitine O-acetyltransferase OS=Columba livia OX=8932 GN=CRAT PE=1 SV=1	S	Function unknown	PREDICTED: carnitine O-palmitoyltransferase 1, liver isoform-like, partial [Salmo salar]
gene42768	--	--	Biological Process: double-strand break repair via homologous recombination (GO:0000724);; Biological Process: nucleotide-excision repair (GO:0006289);; Cellular Component: checkpoint clamp complex (GO:0030896);; Biological Process: intra-S DNA damage checkpoint (GO:0031573);; Biological Process: mitotic DNA replication checkpoint (GO:0033314);; Cellular Component: site of double-strand break (GO…	--	--	[S]	Function unknown	Essential protein Yae1, N terminal	--	S	Function unknown	oral cancer-overexpressed protein 1 isoform X2 [Oncorhynchus mykiss]
gene27116	--	--	Cellular Component: Golgi apparatus (GO:0005794);; Cellular Component: membrane (GO:0016020);; Biological Process: vesicle-mediated transport (GO:0016192);;	--	--	[F]	Nucleotide transport and metabolism	--	--	U	Intracellular trafficking, secretion, and vesicular transport	unnamed protein product [Oncorhynchus mykiss]
Oncorhynchus_mykiss_newGene_10656	--	--	--	K14299|2.83312e-10|ola:101167897|K14299 nucleoporin SEH1 | (RefSeq) seh1l; SEH1 like nucleoporin	RNA transport (ko03013);; mTOR signaling pathway (ko04150)	--	--	--	--	U	Intracellular trafficking, secretion, and vesicular transport	nucleoporin SEH1-like [Oncorhynchus mykiss]
gene18594	--	--	--	--	--	--	--	SEA domain	--	S	Function unknown	mucin-5AC-like, partial [Oncorhynchus mykiss]
gene24244	--	--	--	K16582|1.04009e-21|mze:101477995|K16582 tubulin polyglutamylase TTLL6/13 [EC:6.-.-.-] | (RefSeq) ttll6; tubulin tyrosine ligase like 6	--	--	--	--	Tubulin polyglutamylase ttll6 OS=Danio rerio OX=7955 GN=ttll6 PE=2 SV=1	S	Function unknown	E3 ubiquitin-protein ligase Smurf1-like [Oncorhynchus mykiss]
Oncorhynchus_mykiss_newGene_32470	[R]	General function prediction only	--	--	--	[R]	General function prediction only	--	Transmembrane and TPR repeat-containing protein 2 OS=Xenopus laevis OX=8355 GN=tmtc2 PE=2 SV=1	S	Function unknown	unnamed protein product [Oncorhynchus mykiss]
gene16604	[H]	Coenzyme transport and metabolism	Biological Process: response to hypoxia (GO:0001666);; Molecular Function: 5-aminolevulinate synthase activity (GO:0003870);; Cellular Component: mitochondrial inner membrane (GO:0005743);; Cellular Component: mitochondrial matrix (GO:0005759);; Biological Process: protoporphyrinogen IX biosynthetic process (GO:0006782);; Molecular Function: pyridoxal phosphate binding (GO:0030170);;	K00643|0|mze:101479627|K00643 5-aminolevulinate synthase [EC:2.3.1.37] | (RefSeq) alas2; 5'-aminolevulinate synthase 2	Glycine, serine and threonine metabolism (ko00260);; Porphyrin and chlorophyll metabolism (ko00860)	[H]	Coenzyme transport and metabolism	Aminotransferase class I and II;; 5-aminolevulinate synthase presequence;; Aminotransferase class-V;; Cys/Met metabolism PLP-dependent enzyme	5-aminolevulinate synthase, erythroid-specific, mitochondrial OS=Opsanus tau OX=8068 GN=alas2 PE=2 SV=1	H	Coenzyme transport and metabolism	5-aminolevulinate synthase, erythroid-specific, mitochondrial-like [Oncorhynchus kisutch]
gene12505	--	--	Molecular Function: DNA binding (GO:0003677);; Molecular Function: nuclease activity (GO:0004518);; Molecular Function: zinc ion binding (GO:0008270);; Biological Process: nucleic acid phosphodiester bond hydrolysis (GO:0090305);;	--	--	--	--	THAP domain	--	S	Function unknown	uncharacterized protein LOC110527645 [Oncorhynchus mykiss]
gene53097	--	--	Molecular Function: ubiquitin-protein transferase activity (GO:0004842);; Biological Process: protein ubiquitination (GO:0016567);;	K09561|3.61022e-29|dre:324243|K09561 STIP1 homology and U-box containing protein 1 [EC:2.3.2.27] | (RefSeq) stub1, wu:fc22f04, zgc:56076; STIP1 homology and U-Box containing protein 1	Ubiquitin mediated proteolysis (ko04120);; Protein processing in endoplasmic reticulum (ko04141)	[O]	Posttranslational modification, protein turnover, chaperones	--	STIP1 homology and U box-containing protein 1 OS=Gallus gallus OX=9031 GN=STUB1 PE=2 SV=1	O	Posttranslational modification, protein turnover, chaperones	E3 ubiquitin-protein ligase CHIP-like [Oncorhynchus mykiss]
Oncorhynchus_mykiss_newGene_14612	--	--	Molecular Function: DNA binding (GO:0003677);; Molecular Function: protein kinase activity (GO:0004672);; Biological Process: transposition, DNA-mediated (GO:0006313);; Biological Process: phosphate-containing compound metabolic process (GO:0006796);; Biological Process: signal transduction (GO:0007165);; Biological Process: DNA integration (GO:0015074);; Molecular Function: hydrolase activity (G…	--	--	--	--	Transposase	--	S	Function unknown	Putative transposase [Dicentrarchus labrax]
gene52911	[K]	Transcription	--	K10268|1.5636e-60|tru:101072398|K10268 F-box and leucine-rich repeat protein 2/20 | (RefSeq) fbxl2; F-box and leucine rich repeat protein 2	--	[R]	General function prediction only	Leucine Rich repeat;; Leucine Rich repeats (2 copies);; Leucine Rich Repeat	Protein AMN1 homolog OS=Danio rerio OX=7955 GN=amn1 PE=2 SV=1	S	Function unknown	F-box/LRR-repeat protein 20-like isoform X2 [Oncorhynchus mykiss]
gene19612	--	--	Molecular Function: DNA binding (GO:0003677);; Cellular Component: nucleus (GO:0005634);; Biological Process: regulation of transcription, DNA-templated (GO:0006355);;	K19383|2.90158e-91|mze:101465438|K19383 homeobox protein TGIF1 | (RefSeq) homeobox protein AKR-like	TGF-beta signaling pathway (ko04350)	[K]	Transcription	Homeobox KN domain;; Homeobox domain	Homeobox protein AKR OS=Gallus gallus OX=9031 PE=2 SV=1	K	Transcription	homeobox protein AKR-like [Oncorhynchus kisutch]
gene50866	[T]	Signal transduction mechanisms	Cellular Component: extracellular region (GO:0005576);; Biological Process: immune response (GO:0006955);; Molecular Function: chemokine activity (GO:0008009);; Biological Process: cell chemotaxis (GO:0060326);;	K16595|8.63324e-13|cfa:445451|K16595 C-C motif chemokine 13 | (RefSeq) CCL13, MCP-4; chemokine (C-C motif) ligand 13	Cytokine-cytokine receptor interaction (ko04060);; Chemokine signaling pathway (ko04062);; NF-kappa B signaling pathway (ko04064)	--	--	Small cytokines (intecrine/chemokine), interleukin-8 like	C-C motif chemokine 4 homolog OS=Gallus gallus OX=9031 GN=CCL4 PE=3 SV=4	U	Intracellular trafficking, secretion, and vesicular transport	small inducible cytokine A13 isoform X3 [Oncorhynchus mykiss]
gene22428	--	--	Cellular Component: integral component of membrane (GO:0016021);;	K17348|9.31886e-81|xma:102219743|K17348 tetraspanin-1 | (RefSeq) tetraspanin-1-like	--	[R]	General function prediction only	Tetraspanin family	Tetraspanin-9 OS=Xenopus laevis OX=8355 GN=tspan9 PE=2 SV=1	S	Function unknown	tetraspanin-1-like [Oncorhynchus mykiss]
gene2383	[R]	General function prediction only	Biological Process: toll-like receptor signaling pathway (GO:0002224);; Molecular Function: transmembrane signaling receptor activity (GO:0004888);; Cellular Component: integral component of membrane (GO:0016021);;	--	--	[T]	Signal transduction mechanisms	Leucine rich repeat;; TIR domain;; Leucine Rich repeats (2 copies);; TIR domain;; Leucine rich repeats (6 copies);; Leucine Rich Repeat	Toll-like receptor 2 type-1 OS=Gallus gallus OX=9031 GN=TLR2-1 PE=2 SV=1	S	Function unknown	toll-like receptor 2 type-2 [Oncorhynchus mykiss]
gene40915	[I]	Lipid transport and metabolism	Molecular Function: methyltransferase activity (GO:0008168);; Biological Process: methylation (GO:0032259);;	K05929|0|mze:101475026|K05929 phosphoethanolamine N-methyltransferase [EC:2.1.1.103] | (RefSeq) phosphoethanolamine N-methyltransferase 3-like	Glycerophospholipid metabolism (ko00564)	[IR]	Lipid transport and metabolism;; General function prediction only	Methyltransferase domain;; Methyltransferase domain;; Methyltransferase domain;; Methyltransferase domain;; Methyltransferase domain;; AdoMet dependent proline di-methyltransferase;; CheR methyltransferase, SAM binding domain;; ubiE/COQ5 methyltransferase family;; Nodulation protein S (NodS);; Ribosomal RNA adenine dimethylase;; Tellurite resistance protein TehB;; O-methyltransferase	--	S	Function unknown	phosphoethanolamine N-methyltransferase 3-like [Oncorhynchus mykiss]
gene9568	--	--	Cellular Component: Golgi membrane (GO:0000139);; Molecular Function: calcium channel activity (GO:0005262);; Biological Process: ER overload response (GO:0006983);; Cellular Component: integral component of endoplasmic reticulum membrane (GO:0030176);; Biological Process: endoplasmic reticulum calcium ion homeostasis (GO:0032469);; Biological Process: calcium ion transmembrane transport (GO:0070…	--	--	[S]	Function unknown	Integral membrane protein DUF106	Calcium load-activated calcium channel OS=Danio rerio OX=7955 GN=tmco1 PE=2 SV=1	S	Function unknown	transmembrane and coiled-coil domains 1 [Salmo salar]
gene27709	--	--	--	--	--	--	--	Centrosome-associated N terminus;; Centrosome-associated C terminus	Protein FAM110B OS=Danio rerio OX=7955 GN=fam110b PE=2 SV=1	O	Posttranslational modification, protein turnover, chaperones	protein FAM110B-like [Oncorhynchus kisutch]
gene38665	[UW]	Intracellular trafficking, secretion, and vesicular transport;; Extracellular structures	Molecular Function: extracellular matrix structural constituent (GO:0005201);; Cellular Component: proteinaceous extracellular matrix (GO:0005578);; Cellular Component: collagen trimer (GO:0005581);;	K06237|0|tru:101077014|K06237 collagen, type IV, alpha | (RefSeq) col4a1; collagen type IV alpha 1 chain	Focal adhesion (ko04510);; ECM-receptor interaction (ko04512);; AGE-RAGE signaling pathway in diabetic complications (ko04933)	[W]	Extracellular structures	Collagen triple helix repeat (20 copies);; C-terminal tandem repeated domain in type 4 procollagen	Collagen alpha-1(XXVII) chain B OS=Danio rerio OX=7955 GN=col27a1b PE=2 SV=1	S	Function unknown	collagen alpha-1(IV) chain-like [Oncorhynchus mykiss]
gene1835	--	--	--	K06102|3.25191e-165|mze:101483907|K06102 cingulin | (RefSeq) cgn; cingulin	Tight junction (ko04530)	--	--	Myosin tail	Cingulin OS=Danio rerio OX=7955 GN=cgn PE=2 SV=1	Z	Cytoskeleton	cingulin-like, partial [Oncorhynchus mykiss]
gene4228	--	--	Cellular Component: Golgi membrane (GO:0000139);; Biological Process: protein glycosylation (GO:0006486);; Cellular Component: integral component of membrane (GO:0016021);; Molecular Function: transferase activity, transferring glycosyl groups (GO:0016757);; Molecular Function: carbohydrate binding (GO:0030246);;	K00710|0|xma:102222804|K00710 polypeptide N-acetylgalactosaminyltransferase [EC:2.4.1.41] | (RefSeq) galnt1; polypeptide N-acetylgalactosaminyltransferase 1	Mucin type O-Glycan biosynthesis (ko00512)	[O]	Posttranslational modification, protein turnover, chaperones	Glycosyl transferase family 2;; Ricin-type beta-trefoil lectin domain	Polypeptide N-acetylgalactosaminyltransferase 11 OS=Xenopus tropicalis OX=8364 GN=galnt11 PE=1 SV=2	S	Function unknown	polypeptide N-acetylgalactosaminyltransferase 1 [Oncorhynchus mykiss]
gene23676	--	--	Biological Process: intracellular protein transport (GO:0006886);; Biological Process: ER to Golgi vesicle-mediated transport (GO:0006888);; Molecular Function: zinc ion binding (GO:0008270);; Cellular Component: COPII vesicle coat (GO:0030127);; Biological Process: embryonic neurocranium morphogenesis (GO:0048702);; Biological Process: erythrocyte development (GO:0048821);; Biological Process: c…	K14006|0|mze:101466658|K14006 protein transport protein SEC23 | (RefSeq) sec23b; protein transport protein Sec23B	Protein processing in endoplasmic reticulum (ko04141)	[U]	Intracellular trafficking, secretion, and vesicular transport	Sec23/Sec24 trunk domain;; Sec23/Sec24 beta-sandwich domain;; Sec23/Sec24 helical domain;; Gelsolin repeat;; Sec23/Sec24 zinc finger	Protein transport protein Sec23A OS=Gallus gallus OX=9031 GN=SEC23A PE=2 SV=1	U	Intracellular trafficking, secretion, and vesicular transport	protein transport protein Sec23A [Oncorhynchus mykiss]
gene861	[T]	Signal transduction mechanisms	Molecular Function: transcription factor activity, sequence-specific DNA binding (GO:0003700);; Cellular Component: nucleus (GO:0005634);; Cellular Component: transcription factor complex (GO:0005667);; Cellular Component: cytoplasm (GO:0005737);; Biological Process: regulation of transcription, DNA-templated (GO:0006355);; Molecular Function: protein dimerization activity (GO:0046983);;	K02296|0|tru:101069900|K02296 aryl hydrocarbon receptor nuclear translocator-like protein 1 | (RefSeq) arntl; aryl hydrocarbon receptor nuclear translocator like	Herpes simplex infection (ko05168)	[K]	Transcription	PAS domain;; PAS fold;; PAS fold;; Helix-loop-helix DNA-binding domain;; PAS domain	Aryl hydrocarbon receptor nuclear translocator-like protein 1 OS=Tyto alba OX=56313 GN=ARNTL PE=2 SV=1	K	Transcription	aryl hydrocarbon receptor nuclear translocator-like protein 1 [Oncorhynchus mykiss]
gene24135	[Z]	Cytoskeleton	Molecular Function: ATP binding (GO:0005524);;	K05692|0|hmg:100206987|K05692 actin beta/gamma 1 | (RefSeq) actin, non-muscle 6.2-like	Phagosome (ko04145)	[Z]	Cytoskeleton	Actin	Actin, cytoplasmic 1 OS=Xenopus laevis OX=8355 GN=actb PE=2 SV=1	Z	Cytoskeleton	PREDICTED: actin, non-muscle 6.2 [Salmo salar]
gene14438	--	--	--	--	--	[R]	General function prediction only	SAM domain (Sterile alpha motif);; SAM domain (Sterile alpha motif)	--	S	Function unknown	unnamed protein product [Oncorhynchus mykiss]
gene4658	--	--	Molecular Function: sulfotransferase activity (GO:0008146);;	K16949|2.56987e-105|cmk:103182565|K16949 amine sulfotransferase [EC:2.8.2.3] | (RefSeq) amine sulfotransferase-like	--	[R]	General function prediction only	Sulfotransferase domain;; Sulfotransferase family	Sulfotransferase family cytosolic 1B member 1 OS=Gallus gallus OX=9031 GN=SULT1B1 PE=2 SV=1	S	Function unknown	amine sulfotransferase-like isoform X1 [Oncorhynchus mykiss]
gene27677	--	--	--	--	--	--	--	--	--	S	Function unknown	uncharacterized protein LOC110489830 [Oncorhynchus mykiss]
gene31505	--	--	Cellular Component: intracellular (GO:0005622);; Biological Process: vacuolar transport (GO:0007034);;	K12194|1.49611e-74|ola:101163168|K12194 charged multivesicular body protein 4 | (RefSeq) chmp4b; charged multivesicular body protein 4B	Endocytosis (ko04144)	[U]	Intracellular trafficking, secretion, and vesicular transport	Snf7	Charged multivesicular body protein 4b OS=Danio rerio OX=7955 GN=chmp4b PE=2 SV=1	U	Intracellular trafficking, secretion, and vesicular transport	charged multivesicular body protein 4b-like [Oncorhynchus mykiss]
gene26295	--	--	--	--	--	--	--	--	--	--	--	protein PRRC2A-like [Oncorhynchus mykiss]
gene30045	--	--	Molecular Function: DNA binding (GO:0003677);; Biological Process: regulation of transcription, DNA-templated (GO:0006355);;	K11471|0|dre:403066|K11471 additional sex combs-like protein | (RefSeq) asxl1, si:dkey-202m22.4; additional sex combs like transcriptional regulator 1	--	--	--	Asx homology domain;; PHD domain of transcriptional enhancer, Asx;; HB1, ASXL, restriction endonuclease HTH domain	Putative Polycomb group protein ASXL2 OS=Gallus gallus OX=9031 GN=ASXL2 PE=2 SV=1	S	Function unknown	putative Polycomb group protein ASXL1 isoform X1 [Oncorhynchus mykiss]
gene32083	--	--	Cellular Component: cytoplasm (GO:0005737);; Cellular Component: mRNA cleavage and polyadenylation specificity factor complex (GO:0005847);; Biological Process: termination of RNA polymerase II transcription (GO:0006369);; Biological Process: mRNA polyadenylation (GO:0006378);; Molecular Function: CTD phosphatase activity (GO:0008420);; Biological Process: dephosphorylation of RNA polymerase II C…	K15544|5.84754e-133|mze:101468049|K15544 RNA polymerase II subunit A C-terminal domain phosphatase SSU72 [EC:3.1.3.16] | (RefSeq) ssu72; SSU72 homolog, RNA polymerase II CTD phosphatase	mRNA surveillance pathway (ko03015)	[K]	Transcription	Ssu72-like protein	RNA polymerase II subunit A C-terminal domain phosphatase SSU72 OS=Danio rerio OX=7955 GN=ssu72 PE=2 SV=1	K	Transcription	Ssu72 RNA polymerase II CTD phosphatase-like [Salmo salar]
Oncorhynchus_mykiss_newGene_22492	--	--	Molecular Function: amyloid-beta binding (GO:0001540);; Cellular Component: nucleus (GO:0005634);; Cellular Component: cytoplasm (GO:0005737);; Biological Process: regulation of transcription, DNA-templated (GO:0006355);; Molecular Function: transcription factor binding (GO:0008134);;	K04530|3.00714e-22|dre:564990|K04530 amyloid beta A4 precursor protein-binding family B member 2 | (RefSeq) apbb2b, si:ch211-201g8.2; amyloid beta (A4) precursor protein-binding, family B, member 2b	--	--	--	--	--	O	Posttranslational modification, protein turnover, chaperones	PREDICTED: amyloid beta A4 precursor protein-binding family B member 1-like [Esox lucius]
gene55095	--	--	Cellular Component: integral component of membrane (GO:0016021);;	K18259|1.84109e-157|xma:102217515|K18259 protein amnionless | (RefSeq) amn; amnion associated transmembrane protein	--	--	--	Amnionless	--	S	Function unknown	protein amnionless-like [Oncorhynchus mykiss]
gene31639	[O]	Posttranslational modification, protein turnover, chaperones	Molecular Function: ATP binding (GO:0005524);;	K02207|3.02054e-127|ola:101168034|K02207 ubiquitin-conjugating enzyme E2 R [EC:2.3.2.23] | (RefSeq) ube2r2; ubiquitin conjugating enzyme E2 R2	Ubiquitin mediated proteolysis (ko04120);; Herpes simplex infection (ko05168)	[O]	Posttranslational modification, protein turnover, chaperones	Ubiquitin-conjugating enzyme	Ubiquitin-conjugating enzyme E2 D4 OS=Xenopus laevis OX=8355 GN=ube2d4 PE=1 SV=1	O	Posttranslational modification, protein turnover, chaperones	ubiquitin-conjugating enzyme E2 R2 isoform X1 [Salvelinus alpinus]
gene28929	--	--	Molecular Function: protein tyrosine phosphatase activity (GO:0004725);; Molecular Function: protein tyrosine/serine/threonine phosphatase activity (GO:0008138);; Biological Process: peptidyl-tyrosine dephosphorylation (GO:0035335);;	K01110|0|xma:102226067|K01110 phosphatidylinositol-3,4,5-trisphosphate 3-phosphatase and dual-specificity protein phosphatase PTEN [EC:3.1.3.16 3.1.3.48 3.1.3.67] | (RefSeq) phosphatidylinositol 3,4,5-trisphosphate 3-phosphatase and dual-specificity protein phosphatase PTEN-like	Inositol phosphate metabolism (ko00562);; FoxO signaling pathway (ko04068);; Phosphatidylinositol signaling system (ko04070);; p53 signaling pathway (ko04115);; mTOR signaling pathway (ko04150);; Focal adhesion (ko04510);; Tight junction (ko04530)	[TR]	Signal transduction mechanisms;; General function prediction only	C2 domain of PTEN tumour-suppressor protein;; Dual specificity phosphatase, catalytic domain;; Protein-tyrosine phosphatase	Phosphatidylinositol 3,4,5-trisphosphate 3-phosphatase and dual-specificity protein phosphatase PTEN OS=Xenopus laevis OX=8355 GN=pten PE=2 SV=1	T	Signal transduction mechanisms	phosphatidylinositol 3,4,5-trisphosphate 3-phosphatase and dual-specificity protein phosphatase PTEN-like isoform X2 [Oncorhynchus kisutch]
Oncorhynchus_mykiss_newGene_54714	--	--	--	--	--	--	--	--	--	L	Replication, recombination and repair	PREDICTED: DNA annealing helicase and endonuclease ZRANB3-like [Salmo salar]
gene42212	--	--	Cellular Component: integral component of membrane (GO:0016021);;	--	--	[U]	Intracellular trafficking, secretion, and vesicular transport	Yip1 domain	Protein YIPF5 OS=Xenopus laevis OX=8355 GN=yipf5 PE=2 SV=1	U	Intracellular trafficking, secretion, and vesicular transport	protein YIPF7-like [Oncorhynchus mykiss]
gene586	[R]	General function prediction only	Biological Process: histone H4-K20 trimethylation (GO:0034773);; Molecular Function: histone methyltransferase activity (H4-K20 specific) (GO:0042799);;	K11429|0|dre:572849|K11429 histone-lysine N-methyltransferase SUV420H [EC:2.1.1.43] | (RefSeq) suv420h1, kmt5b, wu:fb97g06, wu:fi57g03, zgc:103527; suppressor of variegation 4-20 homolog 1 (Drosophila)	Lysine degradation (ko00310)	[B]	Chromatin structure and dynamics	SET domain;; Domain of unknown function (DUF4516);; Transposase;; Gonadotropin-releasing hormone	Histone-lysine N-methyltransferase KMT5B OS=Danio rerio OX=7955 GN=kmt5b PE=2 SV=2	S	Function unknown	histone-lysine N-methyltransferase KMT5B-like isoform X1 [Oncorhynchus mykiss]
Oncorhynchus_mykiss_newGene_33863	--	--	--	--	--	--	--	--	--	--	--	hypothetical protein XENTR_v90030360mg, partial [Xenopus tropicalis]
gene49062	--	--	Molecular Function: DNA binding (GO:0003677);; Biological Process: regulation of transcription, DNA-templated (GO:0006355);;	--	--	[J]	Translation, ribosomal structure and biogenesis	--	--	K	Transcription	LOW QUALITY PROTEIN: calcium-regulated heat stable protein 1-like [Salvelinus alpinus]
gene7774	--	--	Biological Process: DNA repair (GO:0006281);; Biological Process: response to ionizing radiation (GO:0010212);; Cellular Component: SOSS complex (GO:0070876);;	--	--	--	--	SOSS complex subunit C	SOSS complex subunit C OS=Salmo salar OX=8030 GN=inip PE=3 SV=1	S	Function unknown	PREDICTED: SOSS complex subunit C isoform X1 [Salmo salar]
gene10630	[I]	Lipid transport and metabolism	Molecular Function: iron ion binding (GO:0005506);; Biological Process: fatty acid biosynthetic process (GO:0006633);; Cellular Component: integral component of membrane (GO:0016021);; Molecular Function: oxidoreductase activity (GO:0016491);; Biological Process: oxidation-reduction process (GO:0055114);;	K10223|4.77329e-83|ola:101157865|K10223 cholesterol 25-hydroxylase [EC:1.14.99.38] | (RefSeq) cholesterol 25-hydroxylase-like protein	Primary bile acid biosynthesis (ko00120)	[I]	Lipid transport and metabolism	Fatty acid hydroxylase superfamily	Cholesterol 25-hydroxylase-like protein OS=Danio rerio OX=7955 GN=ch25h PE=2 SV=1	I	Lipid transport and metabolism	cholesterol 25-hydroxylase-like protein [Oncorhynchus mykiss]
gene30007	[C]	Energy production and conversion	Cellular Component: mitochondrial inner membrane (GO:0005743);; Biological Process: tricarboxylic acid cycle (GO:0006099);; Molecular Function: succinate dehydrogenase (ubiquinone) activity (GO:0008177);; Molecular Function: electron carrier activity (GO:0009055);; Molecular Function: metal ion binding (GO:0046872);; Molecular Function: 2 iron, 2 sulfur cluster binding (GO:0051537);; Molecular Fu…	K00235|0|mze:101478036|K00235 succinate dehydrogenase (ubiquinone) iron-sulfur subunit [EC:1.3.5.1] | (RefSeq) succinate dehydrogenase [ubiquinone] iron-sulfur subunit, mitochondrial	Citrate cycle (TCA cycle) (ko00020);; Oxidative phosphorylation (ko00190);; Carbon metabolism (ko01200)	[C]	Energy production and conversion	2Fe-2S iron-sulfur cluster binding domain;; 4Fe-4S dicluster domain;; 4Fe-4S dicluster domain;; 4Fe-4S dicluster domain	Succinate dehydrogenase [ubiquinone] iron-sulfur subunit, mitochondrial OS=Danio rerio OX=7955 GN=sdhb PE=2 SV=1	C	Energy production and conversion	succinate dehydrogenase [ubiquinone] iron-sulfur subunit, mitochondrial-like [Oncorhynchus mykiss]
gene16335	[R]	General function prediction only	Molecular Function: protein serine/threonine kinase activity (GO:0004674);; Molecular Function: ATP binding (GO:0005524);; Biological Process: protein phosphorylation (GO:0006468);;	K04443|0|dre:327321|K04443 mitogen-activated protein kinase-activated protein kinase 2 [EC:2.7.11.1] | (RefSeq) mapkapk2a, mapkapk2, wu:fb30e10, wu:fc56c10, wu:fi03a01; mitogen-activated protein kinase-activated protein kinase 2a	MAPK signaling pathway (ko04010);; VEGF signaling pathway (ko04370)	[T]	Signal transduction mechanisms	Protein kinase domain;; Protein tyrosine kinase;; Lipopolysaccharide kinase (Kdo/WaaP) family	MAP kinase-interacting serine/threonine-protein kinase 1 OS=Xenopus tropicalis OX=8364 GN=mknk1 PE=2 SV=1	T	Signal transduction mechanisms	MAP kinase-activated protein kinase 2-like [Oncorhynchus mykiss]
gene16757	--	--	--	K19501|0|mze:101487727|K19501 anoctamin-7 | (RefSeq) ano7p1; anoctamin-7	--	[S]	Function unknown	Calcium-activated chloride channel;; Dimerisation domain of Ca+-activated chloride-channel, anoctamin	Anoctamin-10 OS=Danio rerio OX=7955 GN=ano10 PE=2 SV=1	U	Intracellular trafficking, secretion, and vesicular transport	anoctamin-7-like isoform X1 [Oncorhynchus mykiss]
Oncorhynchus_mykiss_newGene_41873	[C]	Energy production and conversion	Molecular Function: NADH dehydrogenase (ubiquinone) activity (GO:0008137);; Molecular Function: FMN binding (GO:0010181);; Molecular Function: NAD binding (GO:0051287);; Molecular Function: 4 iron, 4 sulfur cluster binding (GO:0051539);; Biological Process: oxidation-reduction process (GO:0055114);;	K03942|1.18051e-53|mze:101485676|K03942 NADH dehydrogenase (ubiquinone) flavoprotein 1 [EC:1.6.5.3 1.6.99.3] | (RefSeq) NADH dehydrogenase [ubiquinone] flavoprotein 1, mitochondrial-like	Oxidative phosphorylation (ko00190)	[C]	Energy production and conversion	Respiratory-chain NADH dehydrogenase 51 Kd subunit	--	C	Energy production and conversion	unnamed protein product, partial [Oncorhynchus mykiss]
gene12353	--	--	--	--	--	--	--	Uncharacterised protein family UPF0728	UPF0728 protein C10orf53 homolog OS=Danio rerio OX=7955 GN=zgc:153142 PE=3 SV=1	S	Function unknown	UPF0728 protein C10orf53 homolog [Oncorhynchus kisutch]
gene38952	[R]	General function prediction only	Molecular Function: aminocarboxymuconate-semialdehyde decarboxylase activity (GO:0001760);; Cellular Component: cytosol (GO:0005829);; Biological Process: tryptophan catabolic process (GO:0006569);; Molecular Function: hydrolase activity (GO:0016787);; Biological Process: regulation of quinolinate biosynthetic process (GO:1904984);;	K03392|0|dre:557166|K03392 aminocarboxymuconate-semialdehyde decarboxylase [EC:4.1.1.45] | (RefSeq) acmsd, zgc:162888; aminocarboxymuconate semialdehyde decarboxylase	Tryptophan metabolism (ko00380)	[R]	General function prediction only	Amidohydrolase	--	S	Function unknown	2-amino-3-carboxymuconate-6-semialdehyde decarboxylase [Oncorhynchus mykiss]
gene11546	--	--	--	--	--	--	--	TMC domain	Transmembrane channel-like protein 3 OS=Gallus gallus OX=9031 GN=Tmc3 PE=2 SV=1	U	Intracellular trafficking, secretion, and vesicular transport	transmembrane channel-like protein 3 [Oncorhynchus mykiss]
gene51234	[I]	Lipid transport and metabolism	Molecular Function: iron ion binding (GO:0005506);; Biological Process: fatty acid biosynthetic process (GO:0006633);; Molecular Function: oxidoreductase activity (GO:0016491);; Biological Process: oxidation-reduction process (GO:0055114);;	K07750|5.19484e-70|xma:102218750|K07750 methylsterol monooxygenase [EC:1.14.13.72] | (RefSeq) faxdc2; fatty acid hydroxylase domain containing 2	Steroid biosynthesis (ko00100)	[I]	Lipid transport and metabolism	Fatty acid hydroxylase superfamily	Methylsterol monooxygenase 1 OS=Gallus gallus OX=9031 GN=MSMO1 PE=2 SV=1	I	Lipid transport and metabolism	unnamed protein product [Oncorhynchus mykiss]
gene2136	[M]	Cell wall/membrane/envelope biogenesis	--	--	--	[WV]	Extracellular structures;; Defense mechanisms	von Willebrand factor type D domain;; IgGFc binding protein;; C8 domain;; Trypsin Inhibitor like cysteine rich domain;; TILa domain	Alpha-tectorin OS=Gallus gallus OX=9031 GN=TECTA PE=1 SV=1	S	Function unknown	IgGFc-binding protein-like [Oncorhynchus mykiss]
gene29644	[T]	Signal transduction mechanisms	Molecular Function: transmembrane receptor protein serine/threonine kinase activity (GO:0004675);; Molecular Function: signal transducer, downstream of receptor, with serine/threonine kinase activity (GO:0004702);; Molecular Function: ATP binding (GO:0005524);; Biological Process: transmembrane receptor protein serine/threonine kinase signaling pathway (GO:0007178);; Cellular Component: integral …	K13594|0|ola:101169359|K13594 activin receptor-like kinase 1 [EC:2.7.11.30] | (RefSeq) serine/threonine-protein kinase receptor R3-like	--	[T]	Signal transduction mechanisms	Protein tyrosine kinase;; Protein kinase domain;; Transforming growth factor beta type I GS-motif	Activin receptor type-1 OS=Gallus gallus OX=9031 GN=ACVR1 PE=2 SV=1	T	Signal transduction mechanisms	serine/threonine-protein kinase receptor R3-like [Oncorhynchus mykiss]
gene21804	--	--	Cellular Component: integral component of membrane (GO:0016021);;	--	--	--	--	Fibronectin type III domain	--	S	Function unknown	interleukin-27 receptor alpha [Oncorhynchus mykiss]
gene39095	--	--	Cellular Component: integral component of membrane (GO:0016021);;	--	--	--	--	--	--	S	Function unknown	uncharacterized protein LOC110501968 isoform X1 [Oncorhynchus mykiss]
Oncorhynchus_mykiss_newGene_39396	--	--	Cellular Component: intracellular (GO:0005622);; Biological Process: intracellular signal transduction (GO:0035556);; Molecular Function: metal ion binding (GO:0046872);;	K16733|1.31694e-145|shr:100927360|K16733 Rac GTPase-activating protein 1 | (RefSeq) RACGAP1; Rac GTPase activating protein 1	--	[R]	General function prediction only	Phorbol esters/diacylglycerol binding domain (C1 domain);; RhoGAP domain;; RhoGAP domain	Rho GTPase-activating protein 26 OS=Xenopus tropicalis OX=8364 GN=arhgap26 PE=2 SV=1	S	Function unknown	PREDICTED: rac GTPase-activating protein 1 [Esox lucius]
gene34528	--	--	Biological Process: single organismal cell-cell adhesion (GO:0016337);; Molecular Function: cadherin binding (GO:0045296);;	K05690|2.73642e-47|tru:101067270|K05690 catenin (cadherin-associated protein), delta 1 | (RefSeq) catenin delta-1-like	Adherens junction (ko04520)	[TW]	Signal transduction mechanisms;; Extracellular structures	Armadillo/beta-catenin-like repeat	Catenin delta-1 OS=Xenopus laevis OX=8355 GN=ctnnd1 PE=1 SV=1	U	Intracellular trafficking, secretion, and vesicular transport	PREDICTED: catenin delta-1-like [Salmo salar]
gene55022	--	--	Biological Process: lysosome organization (GO:0007040);;	--	--	[TU]	Signal transduction mechanisms;; Intracellular trafficking, secretion, and vesicular transport	--	--	S	Function unknown	lysosomal-trafficking regulator-like [Oncorhynchus mykiss]
gene29959	--	--	Molecular Function: calcitonin receptor activity (GO:0004948);; Biological Process: cell surface receptor signaling pathway (GO:0007166);; Biological Process: G-protein coupled receptor signaling pathway (GO:0007186);; Cellular Component: integral component of membrane (GO:0016021);;	K04577|0|mze:101474403|K04577 calcitonin receptor-like | (RefSeq) calcitonin gene-related peptide type 1 receptor-like	Neuroactive ligand-receptor interaction (ko04080);; Vascular smooth muscle contraction (ko04270)	[T]	Signal transduction mechanisms	7 transmembrane receptor (Secretin family);; Hormone receptor domain;; Transposase	Calcitonin gene-related peptide type 1 receptor OS=Xenopus tropicalis OX=8364 GN=calcrl PE=2 SV=1	U	Intracellular trafficking, secretion, and vesicular transport	calcitonin gene-related peptide type 1 receptor-like [Oncorhynchus mykiss]
gene20554	--	--	--	--	--	[R]	General function prediction only	Phosphatidylethanolamine-binding protein	--	S	Function unknown	phosphatidylethanolamine-binding protein 1 isoform X1 [Oncorhynchus mykiss]
Oncorhynchus_mykiss_newGene_17071	--	--	--	--	--	--	--	--	--	--	--	uncharacterized protein LOC110528531 [Oncorhynchus mykiss]
gene8278	--	--	--	--	--	--	--	--	NMDA receptor synaptonuclear signaling and neuronal migration factor OS=Danio rerio OX=7955 GN=nsmf PE=2 SV=1	K	Transcription	NMDA receptor synaptonuclear signaling and neuronal migration factor-like [Oncorhynchus mykiss]
gene18673	--	--	Molecular Function: G-protein coupled receptor activity (GO:0004930);; Biological Process: G-protein coupled receptor signaling pathway (GO:0007186);; Cellular Component: integral component of membrane (GO:0016021);;	--	--	--	--	7 transmembrane receptor (rhodopsin family)	--	U	Intracellular trafficking, secretion, and vesicular transport	melanopsin-like [Oncorhynchus mykiss]
gene11150	--	--	--	K14678|0|mze:101484445|K14678 lysyl oxidase-like protein 1 [EC:1.4.3.-] | (RefSeq) loxl1; lysyl oxidase like 1	--	--	--	Lysyl oxidase	Protein-lysine 6-oxidase OS=Gallus gallus OX=9031 GN=LOX PE=2 SV=1	O	Posttranslational modification, protein turnover, chaperones	lysyl oxidase homolog 1-like [Oncorhynchus mykiss]
gene52277	--	--	--	--	--	--	--	--	Zinc finger protein 750 OS=Danio rerio OX=7955 GN=znf750 PE=2 SV=2	K	Transcription	zinc finger protein 750-like [Oncorhynchus mykiss]
gene3415	--	--	--	K19947|0|mze:101483062|K19947 protein-methionine sulfoxide oxidase MICAL [EC:1.14.13.-] | (RefSeq) mical3; microtubule associated monooxygenase, calponin and LIM domain containing 3	--	[TZ]	Signal transduction mechanisms;; Cytoskeleton	Protein of unknown function (DUF3585);; Calponin homology (CH) domain;; CAMSAP CH domain;; LIM domain;; FAD binding domain	Protein-methionine sulfoxide oxidase mical3a OS=Danio rerio OX=7955 GN=mical3a PE=2 SV=2	Z	Cytoskeleton	protein-methionine sulfoxide oxidase mical3a-like [Oncorhynchus mykiss]
gene3379	--	--	Molecular Function: steroid hormone receptor activity (GO:0003707);; Molecular Function: thyroid hormone receptor activity (GO:0004887);; Cellular Component: nucleus (GO:0005634);; Biological Process: regulation of transcription, DNA-templated (GO:0006355);; Molecular Function: zinc ion binding (GO:0008270);; Molecular Function: bile acid binding (GO:0032052);; Biological Process: steroid hormone…	K08537|0|dre:436847|K08537 farnesoid X receptor | (RefSeq) nr1h4, zgc:110190, zgc:92742; nuclear receptor subfamily 1, group H, member 4	--	[T]	Signal transduction mechanisms	Zinc finger, C4 type (two domains);; Ligand-binding domain of nuclear hormone receptor	Retinoic acid receptor beta OS=Coturnix japonica OX=93934 GN=RARB PE=2 SV=1	K	Transcription	bile acid receptor-like isoform X1 [Oncorhynchus mykiss]
gene15470	--	--	Cellular Component: integral component of membrane (GO:0016021);;	--	--	--	--	Brain specific membrane anchored protein	--	U	Intracellular trafficking, secretion, and vesicular transport	transmembrane protein 59 [Oncorhynchus mykiss]
gene41530	--	--	--	--	--	--	--	--	--	S	Function unknown	selenoprotein H [Oncorhynchus mykiss]
gene47675	--	--	Biological Process: ubiquitin-dependent protein catabolic process (GO:0006511);; Biological Process: protein deubiquitination (GO:0016579);; Molecular Function: thiol-dependent ubiquitinyl hydrolase activity (GO:0036459);;	K11839|5.22507e-159|xma:102229326|K11839 ubiquitin carboxyl-terminal hydrolase 8 [EC:3.4.19.12] | (RefSeq) usp8; ubiquitin specific peptidase 8	Endocytosis (ko04144)	[O]	Posttranslational modification, protein turnover, chaperones	Ubiquitin carboxyl-terminal hydrolase;; Ubiquitin carboxyl-terminal hydrolase	Ubiquitin carboxyl-terminal hydrolase 2 OS=Gallus gallus OX=9031 GN=USP2 PE=2 SV=1	O	Posttranslational modification, protein turnover, chaperones	ubiquitin carboxyl-terminal hydrolase 8-like [Oncorhynchus mykiss]
Oncorhynchus_mykiss_newGene_23028	--	--	--	K20915|1.33081e-15|tru:101079380|K20915 tumor suppressor p53-binding protein 1 | (RefSeq) tp53bp1; tumor protein p53 binding protein 1	--	--	--	--	--	S	Function unknown	tumor suppressor p53-binding protein 1-like [Oncorhynchus kisutch]
[truncated: 49,606 more rows]

## Sheet: Function_anno.stat
#Anno_Database	Annotated_Number	300<=length<1000	length>=1000
COG_Annotation	12987	1402	11509
GO_Annotation	32756	5763	26433
KEGG_Annotation	29321	4952	23895
KOG_Annotation	32543	5103	26962
[truncated: 5 more rows]

## Sheet: GO.list
Oncorhynchus_mykiss_newGene_1	GO:0005743	GO:0008137	GO:0016021	GO:0042773	GO:0070469
[truncated: 32,755 more rows]
[truncated: 121 more columns]

[truncated: 3 more sheets: GO_tree.stat, Kegg.pathway, Kegg.ko]
