# Supplementary material for: Innate and early immune responses to Yersinia ruckeri in the spleen of rainbow trout (Oncorhynchus mykiss)
Source: Research Square preprint supplement (doi:10.21203/rs.3.rs-219853/v1), 2021-02-23
Supplement: Supplementary file 5 [file 36a52ec9fe03778234dcc39e.xlsx]

## Sheet: Sheet1
Summary of information regarding the annotation of new genes
Annotated databases	NR	Swiss-Prot	GO	COG	KOG	Pfam	KEGG	eggNOG	All
New Gene Number	7626	1847	4328	580	2358	2674	2360	5411	7737
Ratio (%)	98.57	23.87	55.94	7.5	30.48	34.56	30.5	69.94
